# Supplementary material for: A household randomised-control trial of insecticide-treated screening for malarial control in unimproved houses in Tanzania
Source: Research Square preprint supplement (doi:10.21203/rs.3.rs-6218916/v1), 2025-03-28
Supplement: Supplementary file 1 [file 34bf18de365b1e78b246ec71.xlsx]

## Sheet: Sheet1
Serial Number	Sample ID	PCR results	Number of mosquitoes analysed
36	1088	Anopheles funestus	1
17	1109	Anopheles funestus	1
35	1116	Anopheles funestus	1
32	1121	Anopheles funestus	1
5	1240	Anopheles funestus	1
22	1262	Anopheles funestus	1
27	1267	Anopheles funestus	1
33	1320	Anopheles funestus	1
4	1324	Anopheles funestus	6
37	1331	Anopheles funestus	1
16	1333	Anopheles funestus	2
31	1337	Anopheles funestus	1
34	1337	Anopheles funestus	10
9	1338	Anopheles funestus	1
14	1340	Anopheles funestus	4
1	1343	Anopheles funestus	2
26	1344	Anopheles funestus	2
3	1345	Anopheles funestus	1
12	1345	Anopheles funestus	3
30	1346	Anopheles funestus	1
11	1347	Anopheles funestus	6
2	1348	Anopheles funestus	1
6	1348	Anopheles leeson	1
18	1349	Anopheles funestus	4
10	1352	Anopheles funestus	1
13	1353	Anopheles funestus	1
28	1353	Anopheles funestus	4
23	1354	Anopheles funestus	2
29	1354	Anopheles funestus	2
8	1356	Anopheles funestus	2
15	1357	Anopheles funestus	1
19	1364	Anopheles funestus	1
20	1364	Anopheles funestus	1
24	1376	Anopheles funestus	1
21	1383	Anopheles funestus	2
7	1417	Anopheles funestus	1
25	1444	Anopheles funestus	1
