# Supplementary material for: A household randomised-control trial of insecticide-treated screening for malarial control in unimproved houses in Tanzania
Source: Research Square preprint supplement (doi:10.21203/rs.3.rs-6218916/v1), 2025-03-28
Supplement: Supplementary file 2 [file 3b04b618ffba1c7e263dc3dd.xlsx]

## Sheet: Baseline data
submissiondate	parent_key	interviewer	tablet	village	hamlet	interviewdate	housecode1	consent	ageresponder	icf	responder	keyhhinformation	v00generalinformation	linenumber	relationship	age	gender	education	educationother	occupation	occupationother	slepthere	sleptnet	v01readwrite	v02education	v03numsleepinghouse	v03houseusedsleeping	v031houseownership	v04sleptinhousev045yearsbel	v04sleptinhousev04above5bel	v04sleptinhousev0418yearabo	v04sleptinhousev04pregnant	v05sleptundernetv055yearsbe	v05sleptundernetv05above5be	v05sleptundernetv0518yearab	v05sleptundernetv05pregnant	v06id	v06roofmaterial	v06otherroofmaterial	v07nueaves	v08nuwindows	v081windowmaterial	v081otherwindowmaterial	v09nudoor	v091doormaterial	v091otherdoormaterial	v010ceiling	v011wallmaterial	v011otherwallmaterial
May 16, 2021 7:00:47 PM	uuid:34520f9e-ad2d-4d8b-a16e-5cd0f932cc5e	5	11	1	Miembe Saba	May 6, 2021	1004	1	75	1004	1	uuid:34520f9e-ad2d-4d8b-a16e-5cd0f932cc5e/household-information[2]	2	2	2	50	1	2		5		1	2	1	1	1	1	2	0	0	2	0	0	0	0	0	1	3		4	2	2		2	2		2	2
May 16, 2021 7:00:50 PM	uuid:f064ba0b-e7fc-45ac-aef1-120d05346c71	5	11	1	Miembe Saba	May 6, 2021	1006	1	35	1006	1	uuid:f064ba0b-e7fc-45ac-aef1-120d05346c71/household-information[4]	7	4	3	8	1	2		0		1	1	2	0	1	1	2	2	4	1	0	2	4	1	0	1	3		4	3	1		2	2		2	2
May 16, 2021 7:00:52 PM	uuid:3d16c434-9fec-4cbf-a09d-84b1760a6967	5	11	1	Miembe Saba	May 7, 2021	1007	1	60	1007	1	uuid:3d16c434-9fec-4cbf-a09d-84b1760a6967/household-information[1]	1	1	1	60	2	1		3		1	1	2	1	1	1	2	0	0	1	0	0	0	1	0	1	3		4	4	3		1	2		2	2
May 16, 2021 6:57:17 PM	uuid:9859ff6e-8178-44f9-a2f9-94682f30c104	2	12	1	Miembe Saba	May 6, 2021	1013	1	39	1013	1	uuid:9859ff6e-8178-44f9-a2f9-94682f30c104/household-information[3]	5	3	3	16	1	2		3		1	1	1	2	1	1	2	1	2	2	0	1	2	2	0	1	3		2	4	2		2	2		2	2
May 16, 2021 6:57:18 PM	uuid:e7a0386d-aaa0-45f9-b6ea-64dfd381091b	7	12	1	Miembe Saba	May 6, 2021	1014	1	32	1014	2	uuid:e7a0386d-aaa0-45f9-b6ea-64dfd381091b/household-information[1]	5	1	2	32	2	2		3		1	1	1	2	1	1	2	1	2	2	0	1	2	2	0	1	3		4	4	2		2	2		2	2
May 16, 2021 6:57:20 PM	uuid:16377df0-c780-4e73-8b6f-24270fa4740c	2	12	1	Miembe Saba	May 6, 2021	1015	1	67	1015	2	uuid:16377df0-c780-4e73-8b6f-24270fa4740c/household-information[1]	2	1	2	67	2	2		3		1	1	1	2	1	1	2	0	0	2	0	0	0	2	0	1	3		4	2	1		2	1		2	2
May 16, 2021 6:57:22 PM	uuid:eecd5d51-dbb8-4989-adf6-81f3894c078a	2	12	1	Miembe Saba	May 7, 2021	1016	1	46	1016	1	uuid:eecd5d51-dbb8-4989-adf6-81f3894c078a/household-information[1]	5	1	1	46	1	2		3		1	1	1	2	1	1	2	1	2	2	0	1	2	2	0	1	3		4	4	2		1	2		2	2
May 16, 2021 6:57:23 PM	uuid:01dacbb5-42b1-40f4-9fb4-631e256201a0	2	12	1	Miembe Saba	May 7, 2021	1018	1	19	1018	1	uuid:01dacbb5-42b1-40f4-9fb4-631e256201a0/household-information[1]	1	1	1	19	1	2		3		1	1	1	2	1	1	2	0	0	1	0	0	0	1	0	1	3		4	2	2		1	2		2	2
May 16, 2021 7:00:56 PM	uuid:6dd1f43d-cda1-4ba9-98bb-53ecea5214fc	1	11	1	Mswelezi	May 10, 2021	1019	1	30	1019	2	uuid:6dd1f43d-cda1-4ba9-98bb-53ecea5214fc/household-information[4]	4	4	3	3	2	0		0		1	1	1	2	1	1	2	1	1	2	0	1	1	2	0	1	1		4	2	2		1	3		2	2
May 16, 2021 7:05:32 PM	uuid:94a83a28-76d6-45b0-91d9-e997bdd539ea	9	13	1	Miembe Saba	May 7, 2021	1022	1	20	1022	2	uuid:94a83a28-76d6-45b0-91d9-e997bdd539ea/household-information[1]	4	1	1	31	1	2		3		1	1	1	2	1	1	2	2	0	2	0	2	0	2	0	1	3		7	1	2		3	5	Processed wood	2	2
May 16, 2021 7:05:35 PM	uuid:dd9a2beb-f7b2-44e1-8565-5446ac14cdb0	9	13	1	Miembe Saba	May 7, 2021	1024	1	40	1024	1	uuid:dd9a2beb-f7b2-44e1-8565-5446ac14cdb0/household-information[3]	3	3	3	9	1	2		6	student	1	2	2	2	2	1	2	0	2	1	0	0	0	0	0	2	3		6	0			1	5	Processed wood	2	2
May 16, 2021 7:05:37 PM	uuid:b397415f-3a42-46c0-ac54-64c3823312f6	9	13	1	Miembe Saba	May 7, 2021	1026	1	41	1026	1	uuid:b397415f-3a42-46c0-ac54-64c3823312f6/household-information[1]	5	1	1	41	1	2		2		1	1	1	2	1	1	2	0	1	2	0	0	1	2	0	1	3		6	4	5	Processed wood	2	5	Processed wood	2	2
May 16, 2021 7:05:39 PM	uuid:a79625ad-747a-4861-947b-fd547a60737a	10	13	1	Miembe Saba	May 7, 2021	1027	1	71	1027	1	uuid:a79625ad-747a-4861-947b-fd547a60737a/household-information[6]	7	6	6	7	2	1		6	student	1	1	2	0	1	1	2	1	3	3	0	1	3	3	0	1	3		3	5	5	Processed wood	2	5	Processed wood	2	2
May 16, 2021 7:05:40 PM	uuid:75d7ae37-aa87-4980-9783-d600a9c5f69a	9	13	1	Miembe Saba	May 7, 2021	1028	1	28	1028	2	uuid:75d7ae37-aa87-4980-9783-d600a9c5f69a/household-information[5]	5	5	3	4	2	0		0		1	1	1	2	1	1	2	2	1	2	0	2	1	2	0	1	3		6	2	5	steel bar	2	5	Processed wood	2	2
May 16, 2021 7:00:59 PM	uuid:2a47fbc0-e057-4143-a314-9b317f308496	5	11	1	Mswelezi	May 10, 2021	1029	1	20	1029	3	uuid:2a47fbc0-e057-4143-a314-9b317f308496/household-information[2]	3	2	3	20	1	2		3		1	2	1	2	1	1	2	0	1	2	0	0	0	0	0	1	3		4	2	3		1	2		2	2
May 16, 2021 7:16:58 PM	uuid:16b5b42e-5390-464d-ad14-4ffd33067c2f	11	14	1	Miembe Saba	May 7, 2021	1033	1	79	1033	1	uuid:16b5b42e-5390-464d-ad14-4ffd33067c2f/household-information[1]	1	1	1	79	2	0		3		1	2	2	0	1	1	2	0	0	1	0	0	0	1	0	1	3		4	2	1		2	2		2	2
May 16, 2021 7:17:01 PM	uuid:54242d3f-d5c5-4a55-ba86-2fbb882e96e8	4	14	1	Miembe Saba	May 7, 2021	1034	1	21	1034	3	uuid:54242d3f-d5c5-4a55-ba86-2fbb882e96e8/household-information[8]	8	8	3	10	2	2		0		2		1	2	2	1	2	0	1	1	0	0	0	0	0	2	3		3	2	1		2	1		2	2
May 16, 2021 7:17:07 PM	uuid:7e566d24-9754-43e5-80b6-9f998adcb79f	4	14	1	Miembe Saba	May 7, 2021	1037	1	34	1037	1	uuid:7e566d24-9754-43e5-80b6-9f998adcb79f/household-information[1]	6	1	1	34	2	2		3		1	1	1	2	1	1	2	1	3	2	0	1	3	2	0	1	3		4	6	2		2	2		2	2
May 16, 2021 6:57:24 PM	uuid:076a4b39-68a6-4ed1-bb0d-f29769754c47	2	12	1	Mswelezi	May 10, 2021	1040	1	35	1040	2	uuid:076a4b39-68a6-4ed1-bb0d-f29769754c47/household-information[1]	3	1	1	35	2	2		3		1	1	1	2	1	1	2	1	0	2	0	1	0	2	0	1	3		4	2	2		2	2		2	2
May 16, 2021 7:19:20 PM	uuid:8826ce84-5676-4dc3-a7cf-411e56387acc	12	15	1	Miembe Saba	May 16, 2021	1041	1	65	1041	2	uuid:8826ce84-5676-4dc3-a7cf-411e56387acc/household-information[4]	7	4	6	2	1	0		0		1	1	1	2	2	2	2	2	0	5	0	2	0	5	0	2	3		4	2	2		2	2		2	6
May 16, 2021 7:14:24 PM	uuid:3d2f231e-1484-4f5c-b375-3936e7e9c3fc	13	15	1	Miembe Saba	May 7, 2021	1045	1	59	1045	1	uuid:3d2f231e-1484-4f5c-b375-3936e7e9c3fc/household-information[1]	3	1	1	59	2	2		3		1	1	1	2	1	1	2	0	1	2	0	0	1	2	0	1	3		4	6	2		3	2		2	2
May 16, 2021 7:14:26 PM	uuid:5809e1e3-8803-4319-bb40-ae9c10a6f107	13	15	1	Miembe Saba	May 7, 2021	1047	1	68	1047	1	uuid:5809e1e3-8803-4319-bb40-ae9c10a6f107/household-information[1]	3	1	1	68	2	2		3		1	1	1	2	1	1	2	0	0	3	0	0	0	3	0	1	3		4	2	2		1	2		2	2
May 16, 2021 6:57:25 PM	uuid:9425db72-5cee-4a85-9c89-966fc6ce39ae	7	12	1	Mswelezi	May 10, 2021	1049	1	27	1049	1	uuid:9425db72-5cee-4a85-9c89-966fc6ce39ae/household-information[3]	3	3	3	9	1	2		0		1	2	1	2	1	1	2	0	1	2	0	0	0	0	0	1	3		4	2	2		2	2		2	2
May 16, 2021 7:05:04 PM	uuid:4a960a20-2c5f-449b-a698-3edd32f25ced	14	16	1	Miembe Saba	May 6, 2021	1052	1	81	1052	3	uuid:4a960a20-2c5f-449b-a698-3edd32f25ced/household-information[6]	6	6	6	5	1	1		0		1	1	2	0	1	1	2	0	3	3	0	0	1	0	0	1	3		6	4	2		2	2		2	2
May 16, 2021 7:05:07 PM	uuid:19fdfa9c-4540-48de-957f-c9af84496378	3	16	1	Miembe Saba	May 6, 2021	1053	1	37	1053	1	uuid:19fdfa9c-4540-48de-957f-c9af84496378/household-information[2]	3	2	3	16	1	2		3		1	1	1	2	1	1	2	0	2	1	1	0	2	1	0	1	3		4	4	5	steel bar	2	2		2	5
May 16, 2021 7:05:09 PM	uuid:6c6b58e7-d7be-4d76-8251-db1f0b9754ac	14	16	1	Miembe Saba	May 6, 2021	1054	1	31	1054	1	uuid:6c6b58e7-d7be-4d76-8251-db1f0b9754ac/household-information[2]	3	2	3	10	1	2		0		1	1	1	2	1	2	2	0	2	1	0	0	2	1	0	1	3		4	2	5	Sticks & Net	2	2		2	2
May 16, 2021 7:05:16 PM	uuid:62400f3a-f428-4329-a0a8-532432d907cb	3	16	1	Miembe Saba	May 6, 2021	1055	1	30	1055	2	uuid:62400f3a-f428-4329-a0a8-532432d907cb/household-information[2]	7	2	2	30	2	2		3		2		1	2	1	1	2	1	2	4	0	1	2	4	0	1	3		4	2	1		2	2		2	4
May 16, 2021 7:05:27 PM	uuid:b2de9558-3af5-42b8-b364-f38bcead2aca	14	16	1	Miembe Saba	May 6, 2021	1056	1	45	1056	2	uuid:b2de9558-3af5-42b8-b364-f38bcead2aca/household-information[6]	6	6	6	1	2	0		0		1	1	1	2	1	1	2	1	3	2	0	1	3	2	0	1	3		2	4	5	Processed wood & steel bar	2	2		2	2
May 16, 2021 7:05:30 PM	uuid:c171edd6-4158-4ab1-b2ce-587191b3ec32	3	16	1	Miembe Saba	May 7, 2021	1057	1	41	1057	1	uuid:c171edd6-4158-4ab1-b2ce-587191b3ec32/household-information[2]	4	2	3	15	2	3		0		2		1	2	1	1	2	0	3	1	0	0	3	1	0	1	3		2	4	2		2	2		2	2
May 16, 2021 7:05:32 PM	uuid:33d6efd2-673c-4ae7-8c36-b20a91328c80	14	16	1	Miembe Saba	May 7, 2021	1058	1	63	1058	2	uuid:33d6efd2-673c-4ae7-8c36-b20a91328c80/household-information[4]	5	4	2	60	2	2		3		1	1	1	2	1	1	2	0	2	3	0	0	1	3	0	1	3		6	1	2		1	2		2	2
May 16, 2021 7:05:34 PM	uuid:d5a80224-a564-4309-8121-66d466f3b5de	3	16	1	Miembe Saba	May 7, 2021	1059	1	35	1059	1	uuid:d5a80224-a564-4309-8121-66d466f3b5de/household-information[2]	8	2	2	30	2	2		3		1	1	1	2	1	1	2	1	4	3	0	1	4	3	0	1	3		6	4	5	Steel bar & net	2	2		2	2
May 16, 2021 6:57:27 PM	uuid:ac59fe01-d5f4-4cff-b3aa-6f2a04643273	7	12	1	Mswelezi	May 10, 2021	1060	1	55	1060	1	uuid:ac59fe01-d5f4-4cff-b3aa-6f2a04643273/household-information[2]	2	2	2	35	2	0		3		1	2	2	0	1	1	2	0	0	2	0	0	0	0	0	1	3		4	2	2		2	2		2	2
May 16, 2021 7:13:32 PM	uuid:ee029c72-bb22-4eab-a9a9-9e98362e9f6d	16	17	1	Miembe Saba	May 6, 2021	1062	1	49	1062	1	uuid:ee029c72-bb22-4eab-a9a9-9e98362e9f6d/household-information[3]	5	3	3	30	1	2		3		1	2	1	2	1	1	2	0	1	4	0	0	0	2	0	1	3		4	8	2		2	2		2	5
May 16, 2021 7:13:41 PM	uuid:1e56b085-036e-4e77-811b-3e9e6a7c12b4	16	17	1	Miembe Saba	May 6, 2021	1064	1	30	1064	2	uuid:1e56b085-036e-4e77-811b-3e9e6a7c12b4/household-information[2]	3	2	2	30	2	2		3		1	1	1	2	1	1	2	1	0	2	0	1	0	2	0	1	3		6	1	2		1	2		2	2
May 16, 2021 7:13:44 PM	uuid:abee7f9e-149a-4571-ab45-ee3006730c54	6	17	1	Miembe Saba	May 7, 2021	1067	1	27	1067	1	uuid:abee7f9e-149a-4571-ab45-ee3006730c54/household-information[1]	1	1	1	27	1	2		2		1	2	1	2	1	1	2	0	0	1	0	0	0	0	0	1	3		6	2	1		2	2		2	2
May 16, 2021 7:01:03 PM	uuid:71f45429-9e0b-4086-981f-d63e1fe2d468	5	11	1	Mikuyuni	May 10, 2021	1069	1	29	1069	3	uuid:71f45429-9e0b-4086-981f-d63e1fe2d468/household-information[1]	1	1	1	22	1	2		3		1	1	1	2	1	1	2	0	0	1	0	0	0	1	0	1	3		4	1	2		1	2		2	2
May 16, 2021 7:05:41 PM	uuid:f6064804-a35d-42c0-8ba6-9bfbfa38beae	10	13	1	Mswelezi	May 10, 2021	1071	1	25	1071	2	uuid:f6064804-a35d-42c0-8ba6-9bfbfa38beae/household-information[3]	4	3	3	5	2	0		0		1	1	1	4	1	1	2	2	0	1	0	2	0	1	0	1	3		6	7	5	steel bar	1	5	Processed wood	2	6
May 16, 2021 7:05:43 PM	uuid:f575c268-34f1-4414-ae9c-30ce4e8c461f	9	13	1	Mswelezi	May 10, 2021	1072	1	31	1072	1	uuid:f575c268-34f1-4414-ae9c-30ce4e8c461f/household-information[1]	4	1	1	31	1	2		3		1	1	1	2	1	1	2	1	1	2	0	1	1	2	0	1	3		6	1	5	Processed wood	1	5	Processed wood	2	2
May 16, 2021 7:05:48 PM	uuid:f376b00e-f1f1-4f33-a377-1c768aeb6e53	9	13	1	Tobora	May 12, 2021	1075	1	35	1075	1	uuid:f376b00e-f1f1-4f33-a377-1c768aeb6e53/household-information[5]	7	5	3	12	2	2		6	student	1	1	1	2	2	2	2	2	3	2	0	2	3	2	0	2	3		4	0			1	5	Processed wood	2	2
May 16, 2021 6:57:27 PM	uuid:83561ca9-f0ab-4543-a5d9-d9d9f8107bd8	2	12	1	Mikuyuni	May 10, 2021	1076	1	25	1076	3	uuid:83561ca9-f0ab-4543-a5d9-d9d9f8107bd8/household-information[3]	3	3	9	28	1	2		1		2		1	3	1	1	2	0	0	3	0	0	0	0	0	1	3		4	3	2		2	2		2	2
May 16, 2021 7:17:11 PM	uuid:f0d91edb-efb5-425e-b62e-817ec1b05a6a	11	14	1	Mswelezi	May 10, 2021	1078	1	39	1078	2	uuid:f0d91edb-efb5-425e-b62e-817ec1b05a6a/household-information[6]	9	6	3	9	2	2		0		1	1	2	2	1	1	2	3	3	3	0	3	3	3	0	1	3		6	3	1		2	2		2	2
May 16, 2021 7:17:12 PM	uuid:f52f268a-e3f7-44f3-8b7d-037d15eb02bf	11	14	1	Mswelezi	May 10, 2021	1079	1	33	1079	2	uuid:f52f268a-e3f7-44f3-8b7d-037d15eb02bf/household-information[4]	6	4	3	3	1	0		0		1	1	1	2	1	1	2	2	2	2	0	2	2	2	0	1	1		4	1	1		1	1		2	2
May 16, 2021 7:14:29 PM	uuid:6d57eca1-a5df-432c-aa9f-8509ab2fd3fa	12	15	1	Mswelezi	May 10, 2021	1085	1	25	1085	2	uuid:6d57eca1-a5df-432c-aa9f-8509ab2fd3fa/household-information[2]	5	2	2	25	2	0		3		1	1	1	2	1	1	2	1	2	2	0	1	2	2	0	1	3		4	2	2		2	2		2	2
May 16, 2021 7:05:37 PM	uuid:fde9bd9d-ffeb-43be-bb28-8f564ff5c03c	3	16	1	Mswelezi	May 10, 2021	1089	1	89	1089	3	uuid:fde9bd9d-ffeb-43be-bb28-8f564ff5c03c/household-information[1]	6	1	1	31	2	2		3		1	1	1	2	1	1	2	0	3	3	0	0	3	3	0	1	3		6	2	5	Net	2	2		2	2
May 16, 2021 7:05:47 PM	uuid:7875887b-2d50-4347-aeab-734882177fb6	10	13	1	Mikuyuni	May 10, 2021	1092	1	30	1092	1	uuid:7875887b-2d50-4347-aeab-734882177fb6/household-information[3]	3	3	3	1	2	0		0		1	1	1	2	1	1	2	1	1	1	0	1	1	1	0	1	3		4	1	5	steel bar	1	5	Processed wood	2	2
May 16, 2021 7:13:49 PM	uuid:32527225-97c1-4aa1-b98e-a94a6b1dd43a	16	17	1	Mswelezi	May 10, 2021	1098	1	22	1098	1	uuid:32527225-97c1-4aa1-b98e-a94a6b1dd43a/household-information[1]	1	1	1	22	1	2		4		1	2	1	2	1	1	2	0	0	1	0	0	0	0	0	1	3		4	1	2		1	2		2	2
May 16, 2021 7:17:13 PM	uuid:6837751d-a184-48fd-b8e9-7aea5984a020	11	14	1	Mikuyuni	May 10, 2021	1100	1	66	1100	2	uuid:6837751d-a184-48fd-b8e9-7aea5984a020/household-information[2]	2	2	1	73	1	2		3		2		1	2	1	1	2	0	0	2	0	0	0	1	0	1	3		4	4	2		2	2		2	2
May 16, 2021 7:17:14 PM	uuid:dae1369c-23b0-4aa1-9439-a62d86c77f54	4	14	1	Mikuyuni	May 10, 2021	1101	1	29	1101	2	uuid:dae1369c-23b0-4aa1-9439-a62d86c77f54/household-information[4]	4	4	3	6	1	1		0		1	1	1	2	1	1	2	0	2	2	0	0	2	2	0	1	3		4	2	1		2	1		2	2
May 16, 2021 7:17:15 PM	uuid:ce0656b4-5271-4dbb-a9c3-7e62df6530ac	4	14	1	Mikuyuni	May 10, 2021	1102	1	25	1102	2	uuid:ce0656b4-5271-4dbb-a9c3-7e62df6530ac/household-information[2]	2	2	3	6	2	2		0		1	1	1	2	1	1	2	0	1	1	1	0	1	1	1	1	3		4	3	2		1	2		2	2
May 16, 2021 7:05:50 PM	uuid:336cb599-21a5-4f7d-a596-2515b4e59f43	10	13	1	Tobora	May 12, 2021	1103	1	85	1103	1	uuid:336cb599-21a5-4f7d-a596-2515b4e59f43/household-information[1]	2	1	1	85	1	0		0		1	1	2	0	1	1	2	0	0	2	0	0	0	2	0	1	3		4	2	1		2	5	Processed wood	2	2
May 16, 2021 7:14:36 PM	uuid:e6f12a01-264d-4edc-bb94-061026f669d3	12	15	1	Tobora	May 11, 2021	1105	1	30	1105	2	uuid:e6f12a01-264d-4edc-bb94-061026f669d3/household-information[4]	4	4	3	6	1	0		0		1	1	1	2	1	1	2	0	2	2	0	0	2	2	0	1	1		4	2	2		1	2		2	2
May 16, 2021 7:14:32 PM	uuid:aefa0a54-1eba-4606-8ef2-6dad007d739c	13	15	1	Mikuyuni	May 10, 2021	1106	1	56	1106	2	uuid:aefa0a54-1eba-4606-8ef2-6dad007d739c/household-information[1]	3	1	1	70	1	0		3		1	2	2	0	1	1	2	0	1	2	0	0	0	0	0	1	3		4	3	2		2	2		2	2
May 16, 2021 7:14:34 PM	uuid:fe0cc123-3c80-4ff7-a34c-cbe2a529904c	13	15	1	Mikuyuni	May 10, 2021	1108	1	23	1108	2	uuid:fe0cc123-3c80-4ff7-a34c-cbe2a529904c/household-information[3]	4	3	3	9	2	2		0		1	2	1	2	1	1	2	1	1	2	0	0	0	0	0	1	3		7	2	2		2	2		2	2
May 16, 2021 7:13:55 PM	uuid:383ca6c1-a81c-4075-88e8-d0b7ecc13460	6	17	1	Tobora	May 12, 2021	1110	1	31	1110	2	uuid:383ca6c1-a81c-4075-88e8-d0b7ecc13460/household-information[2]	5	2	2	31	2	0		3		1	1	1	2	1	1	2	1	2	2	0	1	2	2	0	1	5	Tarpaulin	4	1	1		2	1		2	2
May 16, 2021 7:05:52 PM	uuid:631e476a-94b9-4694-9365-92b3b19ba039	9	13	1	Tobora	May 12, 2021	1111	1	60	1111	1	uuid:631e476a-94b9-4694-9365-92b3b19ba039/household-information[2]	9	2	2	45	2	0		3		1	1	1	2	4	3	2	0	1	3	0	0	1	3	0	3	3		4	0			1	5	Processed wood	2	2
May 16, 2021 7:05:41 PM	uuid:cf246ae6-e20b-4a82-977a-00244d555e42	3	16	1	Mikuyuni	May 10, 2021	1112	1	50	1112	1	uuid:cf246ae6-e20b-4a82-977a-00244d555e42/household-information[6]	6	6	6	3	2	0		0		1	2	1	2	1	1	2	2	1	3	0	0	0	0	0	1	3		4	4	5	steel bar	2	2		2	2
May 16, 2021 7:17:18 PM	uuid:be128f04-cf9e-456c-acee-16306d282034	11	14	1	Tobora	May 12, 2021	1117	1	24	1117	2	uuid:be128f04-cf9e-456c-acee-16306d282034/household-information[3]	3	3	3	2	2	0		0		1	1	1	3	1	1	2	1	0	2	0	1	0	2	0	1	3		4	2	1		1	2		2	2
May 16, 2021 7:13:52 PM	uuid:70cc2f14-f35e-4e5c-bb81-f8c34798897d	6	17	1	Mikuyuni	May 10, 2021	1119	1	60	1119	1	uuid:70cc2f14-f35e-4e5c-bb81-f8c34798897d/household-information[5]	5	5	6	30	1	2		3		1	2	2	0	2	2	2	0	2	3	0	0	0	0	0	2	3		4	2	2		2	2		2	2
May 16, 2021 7:14:38 PM	uuid:527056cd-8f2e-406a-a9c0-9d1ab6aeb549	12	15	1	Tobora	May 11, 2021	1120	1	36	1120	1	uuid:527056cd-8f2e-406a-a9c0-9d1ab6aeb549/household-information[1]	5	1	1	36	1	2		3		1	1	1	2	1	1	2	1	2	2	0	1	2	2	0	1	3		4	2	0		1	2		2	2
May 16, 2021 7:01:06 PM	uuid:52ea6c00-a467-4073-b1c6-1101f08957bb	5	11	1	Tobora	May 11, 2021	1122	1	18	1122	1	uuid:52ea6c00-a467-4073-b1c6-1101f08957bb/household-information[1]	1	1	1	18	1	2		3		1	1	1	2	1	1	2	0	0	1	0	0	0	1	0	1	3		4	2	2		2	2		2	2
May 16, 2021 7:17:19 PM	uuid:2fbea1b2-88a5-442d-b0b5-81e242b042c7	11	14	1	Tobora	May 12, 2021	1124	1	53	1124	2	uuid:2fbea1b2-88a5-442d-b0b5-81e242b042c7/household-information[3]	3	3	6	11	2	2		0		1	1	1	2	1	1	2	0	1	2	0	0	1	2	0	1	3		3	1	1		1	3		2	2
May 16, 2021 7:13:56 PM	uuid:bfbb7019-f6cc-415e-a4a5-71b24c8a01c5	16	17	1	Tobora	May 12, 2021	1125	1	23	1125	1	uuid:bfbb7019-f6cc-415e-a4a5-71b24c8a01c5/household-information[1]	1	1	1	23	1	2		3		1	1	1	2	1	1	2	0	0	1	0	0	0	1	0	1	3		3	1	2		1	2		2	2
May 16, 2021 7:14:39 PM	uuid:a5605c92-75ba-4199-b13f-07180f82c900	12	15	1	Tobora	May 11, 2021	1129	1	36	1129	3	uuid:a5605c92-75ba-4199-b13f-07180f82c900/household-information[3]	3	3	3	15	2	2		0		1	1	1	2	1	1	2	0	0	3	0	0	0	3	0	1	3		4	3	2		2	2		2	5
May 16, 2021 7:05:51 PM	uuid:50581b91-d7e4-4d86-9b36-9236cd03babd	3	16	1	Tobora	May 11, 2021	1131	1	29	1131	2	uuid:50581b91-d7e4-4d86-9b36-9236cd03babd/household-information[1]	5	1	2	29	2	2		3		1	1	1	2	1	1	2	0	3	2	0	0	3	2	0	1	3		4	4	3		2	2		2	2
May 16, 2021 6:57:34 PM	uuid:d603b525-6da1-4377-92cd-d6cc7ef46cc4	7	12	1	Tobora	May 11, 2021	1133	1	54	1133	1	uuid:d603b525-6da1-4377-92cd-d6cc7ef46cc4/household-information[1]	5	1	1	54	2	0		4		1	1	2	0	1	1	2	0	0	5	0	0	0	0	0	1	3		4	2	2		1	2		2	2
May 16, 2021 6:57:33 PM	uuid:3d675ea6-a00a-4aec-a314-e6a25f5d391b	2	12	1	Tobora	May 11, 2021	1134	1	41	1134	1	uuid:3d675ea6-a00a-4aec-a314-e6a25f5d391b/household-information[1]	3	1	1	41	2	2		3		2		1	3	1	1	2	0	1	2	0	0	0	0	0	1	3		4	2	2		1	2		2	2
May 16, 2021 7:17:20 PM	uuid:9d787d1e-f569-4d57-81e1-7780405f3d56	4	14	1	Tobora	May 12, 2021	1136	1	39	1136	2	uuid:9d787d1e-f569-4d57-81e1-7780405f3d56/household-information[20]	31	20	3	25	1	0		4		1	1	2	0	4	1	2	8	15	8	0	8	15	8	0	1	3		4	5	2		1	2		2	2
May 16, 2021 7:14:40 PM	uuid:e9cc1604-1c8e-4a27-929b-43240ec32e24	12	15	1	Tobora	May 11, 2021	1137	1	84	1137	1	uuid:e9cc1604-1c8e-4a27-929b-43240ec32e24/household-information[3]	6	3	3	25	2	0		0		1	1	1	2	1	1	2	1	1	4	0	1	1	4	0	1	3		4	5	5	Net	2	2		2	2
May 16, 2021 6:57:35 PM	uuid:2ae6d106-c70f-4b85-b2e1-b10b9fdc13eb	2	12	2	Kibonkho	May 12, 2021	1139	1	40	1139	1	uuid:2ae6d106-c70f-4b85-b2e1-b10b9fdc13eb/household-information[5]	5	5	3	5	1	1		0		1	2	1	2	1	1	2	0	2	3	0	0	0	0	0	1	3		2	4	1		2	2		2	2
May 16, 2021 7:05:56 PM	uuid:bb415ab6-2176-4cc7-bec9-049105c20a0c	14	16	1	Tobora	May 11, 2021	1140	1	39	1140	2	uuid:bb415ab6-2176-4cc7-bec9-049105c20a0c/household-information[6]	7	6	3	4	1	0		0		1	2	1	2	1	1	2	2	2	3	0	0	0	0	0	2	2		4	2	2		1	2		2	2
May 16, 2021 7:05:57 PM	uuid:936024c4-6d17-4771-a424-590bc7a525dd	9	13	2	Kibonkho	May 12, 2021	1141	1	33	1141	1	uuid:936024c4-6d17-4771-a424-590bc7a525dd/household-information[2]	10	2	1	33	2	3		2		1	1	1	2	1	1	2	2	2	6	0	2	2	6	0	1	3		4	6	5	steel bar	2	5	Processed wood	2	6
May 16, 2021 7:05:58 PM	uuid:ff65d1c9-2b6a-426c-bae4-df8c03eaa7a8	3	16	2	Kibonkho	May 12, 2021	1143	1	23	1143	1	uuid:ff65d1c9-2b6a-426c-bae4-df8c03eaa7a8/household-information[2]	3	2	2	22	2	2		3		1	1	1	2	1	1	2	1	0	2	0	0	0	2	0	1	3		4	1	5	Net	1	3		2	2
May 16, 2021 7:01:09 PM	uuid:8f7bce4f-db65-47d7-b82c-a5657f96437b	5	11	2	Kibonkho	May 12, 2021	1150	1	44	1150	1	uuid:8f7bce4f-db65-47d7-b82c-a5657f96437b/household-information[4]	5	4	3	2	2	0		0		1	1	1	2	1	1	2	2	0	3	0	2	0	3	0	1	3		4	4	2		1	2		2	6
May 16, 2021 7:05:59 PM	uuid:be3c2d91-67f9-4533-827c-24db6bc027e6	14	16	2	Kibonkho	May 12, 2021	1151	1	21	1151	2	uuid:be3c2d91-67f9-4533-827c-24db6bc027e6/household-information[1]	2	1	1	25	1	2		3		1	1	1	2	1	1	2	0	0	2	0	0	0	2	0	1	3		3	1	5	Net	1	3		2	2
May 16, 2021 7:14:43 PM	uuid:d4aa85e6-7dae-4638-b8b6-039244391cd4	12	15	2	Kibonkho	May 12, 2021	1152	1	69	1152	1	uuid:d4aa85e6-7dae-4638-b8b6-039244391cd4/household-information[2]	2	2	2	49	2	2		3		1	2	1	2	1	1	2	0	0	2	0	0	0	0	0	1	3		1	1	1		1	3		2	2
May 16, 2021 7:13:59 PM	uuid:a5bce7b8-c1b4-4b54-a834-3a23598a64d8	6	17	2	Kibonkho	May 12, 2021	1153	1	70	1153	2	uuid:a5bce7b8-c1b4-4b54-a834-3a23598a64d8/household-information[2]	3	2	2	70	2	0		3		1	1	2	0	1	1	2	0	1	2	0	0	0	2	0	1	3		2	2	2		1	2		2	2
May 16, 2021 6:57:36 PM	uuid:d8a5fbba-6921-49d7-935a-9ebdbf28acba	2	12	2	Kibonkho	May 12, 2021	1154	1	38	1154	1	uuid:d8a5fbba-6921-49d7-935a-9ebdbf28acba/household-information[2]	2	2	2	33	2	2		3		1	1	1	2	1	1	2	0	0	2	0	0	0	2	0	1	3		4	5	2		2	2		2	2
May 16, 2021 6:57:37 PM	uuid:0c7abdd2-f3d3-4498-8f9a-de3b39046a7c	7	12	2	Kibonkho	May 12, 2021	1161	1	27	1161	2	uuid:0c7abdd2-f3d3-4498-8f9a-de3b39046a7c/household-information[2]	3	2	2	27	2	3		3		1	1	1	2	1	1	2	1	0	2	0	1	0	2	0	1	3		4	2	2		1	2		2	2
May 16, 2021 7:06:00 PM	uuid:ab32f36c-2b5b-453c-ba2d-45dc9957af6a	10	13	2	Kibonkho	May 12, 2021	1162	1	70	1162	1	uuid:ab32f36c-2b5b-453c-ba2d-45dc9957af6a/household-information[2]	5	2	3	36	2	2		2		1	2	2	0	1	1	2	1	2	2	0	0	0	0	0	1	3		2	4	5	steel bar	2	5	Processed wood	2	2
May 16, 2021 7:17:28 PM	uuid:8773780f-4873-4aa5-968f-3c119a163201	4	14	2	Kibonkho	May 12, 2021	1163	1	35	1163	1	uuid:8773780f-4873-4aa5-968f-3c119a163201/household-information[1]	4	1	1	35	1	2		2		1	1	1	2	1	1	2	0	3	1	0	0	3	1	0	1	3		2	1	1		1	2		2	2
May 16, 2021 7:01:10 PM	uuid:7ec97b90-3dda-44dc-b98a-37a9debe2ede	5	11	2	Kibonkho	May 12, 2021	1164	1	44	1164	3	uuid:7ec97b90-3dda-44dc-b98a-37a9debe2ede/household-information[1]	1	1	1	64	1	2		3		1	1	1	2	1	1	2	0	0	1	0	0	0	1	0	1	3		4	4	2		2	2		2	5
May 16, 2021 7:06:02 PM	uuid:d167a95c-7f6c-4e57-b302-6f6800e65347	14	16	2	Kibonkho	May 12, 2021	1165	1	51	1165	2	uuid:d167a95c-7f6c-4e57-b302-6f6800e65347/household-information[3]	5	3	3	21	1	2		3		2		1	2	1	1	2	0	2	3	0	0	2	0	0	1	3		4	1	1		1	3		2	2
May 16, 2021 7:14:45 PM	uuid:39d8ab27-bdff-45c0-a3df-c16154eb0a1d	12	15	2	Kibonkho	May 12, 2021	1166	1	24	1166	1	uuid:39d8ab27-bdff-45c0-a3df-c16154eb0a1d/household-information[2]	3	2	3	1	1	0		0		1	1	1	2	1	1	2	2	0	1	0	2	0	1	0	1	3		1	2	5	Net	2	2		2	2
May 16, 2021 7:14:01 PM	uuid:e5ef27e5-0a7a-4ec4-b96f-68d7018e6886	6	17	2	Kibonkho	May 12, 2021	1167	1	79	1167	1	uuid:e5ef27e5-0a7a-4ec4-b96f-68d7018e6886/household-information[1]	1	1	1	79	1	2		0		1	1	1	2	1	1	2	0	0	1	0	0	0	1	0	1	3		2	3	2		3	2		2	2
May 16, 2021 6:57:38 PM	uuid:5b99a6a1-2ae2-4faa-9816-687eb30b5530	2	12	2	Kibonkho	May 12, 2021	1168	1	37	1168	1	uuid:5b99a6a1-2ae2-4faa-9816-687eb30b5530/household-information[3]	3	3	3	2	1	0		0		2		1	2	1	1	2	0	0	0	0	0	0	0	0	1	3		2	2	1		1	2		2	2
May 16, 2021 7:01:11 PM	uuid:a169b3f5-ee9a-47fa-9d9a-f94de8d31100	5	11	2	Kibonkho	May 12, 2021	1171	1	45	1171	1	uuid:a169b3f5-ee9a-47fa-9d9a-f94de8d31100/household-information[3]	3	3	6	8	1	2		0		1	1	1	2	1	1	2	0	2	1	0	0	2	1	0	1	3		2	3	2		1	2		2	5
May 16, 2021 7:06:03 PM	uuid:a2d19d67-c7b8-42aa-a069-33e9f34f70ba	3	16	2	Kibonkho	May 12, 2021	1172	1	24	1172	2	uuid:a2d19d67-c7b8-42aa-a069-33e9f34f70ba/household-information[3]	4	3	4	19	2	2		3		1	1	1	2	1	1	2	1	0	3	0	1	0	3	0	1	3		1	2	2		1	2		2	2
May 16, 2021 7:14:46 PM	uuid:cfe46253-2092-4371-b071-5a7f56960fe0	12	15	2	Kibonkho	May 12, 2021	1173	1	51	1173	1	uuid:cfe46253-2092-4371-b071-5a7f56960fe0/household-information[5]	8	5	6	8	1	2		0		1	1	2	0	2	2	2	1	4	3	0	1	4	3	0	2	3		4	1	2		1	2		2	2
May 16, 2021 7:14:02 PM	uuid:c0519047-d3d3-4d54-84f9-ac6a591be098	16	17	2	Kibonkho	May 12, 2021	1174	1	66	1174	1	uuid:c0519047-d3d3-4d54-84f9-ac6a591be098/household-information[1]	1	1	1	66	2	0		3		1	2	2	0	1	1	2	0	0	1	0	0	0	0	0	1	3		2	1	2		1	2		2	5
May 16, 2021 7:01:12 PM	uuid:dfe451f8-ba5a-4ff6-a33c-c2463a6c8659	5	11	2	Kibonkho	May 12, 2021	1178	1	71	1178	1	uuid:dfe451f8-ba5a-4ff6-a33c-c2463a6c8659/household-information[2]	2	2	2	49	2	0		3		1	1	1	2	1	1	2	0	0	2	0	0	0	2	0	1	3		4	2	0		1	2		2	2
May 17, 2021 3:58:58 PM	uuid:aa274c39-5d95-4a0a-91a6-0c37de9c9b6d	1	11	2	Kibonkho	May 17, 2021	1184	1	53	1184	1	uuid:aa274c39-5d95-4a0a-91a6-0c37de9c9b6d/household-information[4]	6	4	3	14	2	2		0		1	1	1	2	2	2	2	0	3	3	0	0	3	3	0	1	3		4	2	2		2	2		2	2
May 16, 2021 7:01:13 PM	uuid:0312a111-8cf1-4194-9738-4e96716d70d2	5	11	2	Kibonkho	May 12, 2021	1185	1	32	1185	2	uuid:0312a111-8cf1-4194-9738-4e96716d70d2/household-information[1]	3	1	1	52	1	2		3		1	1	1	2	1	1	2	1	0	2	0	1	0	2	0	1	3		1	1	1		1	2		2	2
May 16, 2021 7:14:49 PM	uuid:1017e79c-8738-4e45-a8cb-5bce2ac92ac6	12	15	2	Kibonkho	May 12, 2021	1187	1	62	1187	3	uuid:1017e79c-8738-4e45-a8cb-5bce2ac92ac6/household-information[1]	4	1	1	62	1	2		1		2		1	2	1	1	2	1	1	2	0	1	1	2	0	1	3		4	1	2		1	2		2	2
May 16, 2021 7:01:14 PM	uuid:4d3a7bc6-bdbd-4fba-a678-092f57fd6488	5	11	2	Kibonkho	May 12, 2021	1192	1	70	1192	2	uuid:4d3a7bc6-bdbd-4fba-a678-092f57fd6488/household-information[3]	3	3	6	4	1	0		0		1	2	2	0	1	1	2	1	0	2	0	1	0	2	0	1	3		3	2	2		1	3		2	2
May 16, 2021 7:20:25 PM	uuid:1f9e3244-131f-476d-8502-63a6b57db73b	11	14	2	Kibonkho	May 16, 2021	1193	1	24	1193	1	uuid:1f9e3244-131f-476d-8502-63a6b57db73b/household-information[3]	4	3	3	7	2	2		0		1	1	1	2	1	1	1	1	1	1	0	1	1	1	0	1	3		1	8	2		2	2		2	6
May 16, 2021 7:14:05 PM	uuid:cb2f237f-8771-4637-8f01-e5ec8bd3db08	16	17	2	Kibonkho	May 12, 2021	1195	1	40	1195	1	uuid:cb2f237f-8771-4637-8f01-e5ec8bd3db08/household-information[1]	4	1	1	40	2	0		3		1	1	2	0	1	1	2	1	2	1	0	1	2	1	0	1	3		5	3	2		2	2		2	2
May 16, 2021 7:14:51 PM	uuid:32bbd2f0-211f-4e19-a159-c1ae65e64f23	12	15	2	Kibonkho	May 12, 2021	1197	1	31	1197	1	uuid:32bbd2f0-211f-4e19-a159-c1ae65e64f23/household-information[4]	4	4	3	9	2	0		0		1	2	1	2	1	1	2	4	2	1	0	0	0	0	0	1	3		4	1	0		1	2		2	2
May 16, 2021 7:01:15 PM	uuid:84265768-f569-48e6-98ed-ce8542cc9ac1	5	11	2	Kibonkho	May 12, 2021	1199	1	41	1199	1	uuid:84265768-f569-48e6-98ed-ce8542cc9ac1/household-information[2]	2	2	2	20	2	2		3		1	1	1	3	1	1	2	0	0	2	0	0	0	2	0	1	3		4	4	2		1	3		2	2
May 16, 2021 7:14:06 PM	uuid:c14119ee-fb2a-46f1-83eb-c426a2af4cd6	16	17	2	Kibonkho	May 12, 2021	1202	1	62	1202	2	uuid:c14119ee-fb2a-46f1-83eb-c426a2af4cd6/household-information[3]	5	3	6	11	2	2		6	student	1	2	1	2	1	1	2	0	3	2	0	0	0	0	0	1	3		3	2	2		2	2		2	2
May 17, 2021 4:01:27 PM	uuid:0914ccb2-ae31-49ec-9144-f1f6c49d1d9f	2	12	2	Kibonkho	May 17, 2021	1204	1	22	1204	2	uuid:0914ccb2-ae31-49ec-9144-f1f6c49d1d9f/household-information[3]	5	3	3	7	1	2		0		1	1	1	3	1	1	2	1	2	2	0	1	2	2	0	1	3		1	1	2		1	2		2	2
May 17, 2021 4:03:49 PM	uuid:4147d130-a313-45ee-b610-c6915c24dffc	9	13	2	Kibonkho	May 17, 2021	1205	1	63	1205	1	uuid:4147d130-a313-45ee-b610-c6915c24dffc/household-information[2]	4	2	2	62	2	2		3		1	1	1	2	2	1	2	0	1	3	0	0	1	3	0	2	3		3	1	5	steel bar	1	3		2	2
May 17, 2021 4:12:52 PM	uuid:68a6a6cd-2cc9-4575-bcc0-7f33b5484446	6	17	2	Kibonkho	May 17, 2021	1208	1	40	1208	1	uuid:68a6a6cd-2cc9-4575-bcc0-7f33b5484446/household-information[3]	3	3	5	2	2	0		0		1	1	1	2	1	1	2	1	0	2	0	1	0	2	0	1	3		4	8	2		2	2		2	2
May 17, 2021 4:01:28 PM	uuid:5f05c4d3-0af0-47a0-a6fe-c2649e6469d2	7	12	2	Kibonkho	May 17, 2021	1211	1	21	1211	3	uuid:5f05c4d3-0af0-47a0-a6fe-c2649e6469d2/household-information[1]	5	1	1	52	2	3		3		1	1	1	3	1	1	2	0	2	3	0	0	2	3	0	1	3		4	2	1		1	2		2	2
May 17, 2021 4:06:45 PM	uuid:1956beac-8905-4a02-8d0f-7bd4be58480e	13	15	2	Kibonkho	May 17, 2021	1215	1	40	1215	2	uuid:1956beac-8905-4a02-8d0f-7bd4be58480e/household-information[4]	6	4	3	17	2	3		0		1	1	1	2	1	1	2	1	3	2	0	1	3	2	0	1	3		4	2	3		1	2		2	2
May 17, 2021 4:04:51 PM	uuid:e95c31a3-ed92-44a1-a7be-6426e51acf58	4	14	2	Kibonkho	May 17, 2021	1221	1	75	1221	1	uuid:e95c31a3-ed92-44a1-a7be-6426e51acf58/household-information[1]	2	1	1	75	2	0		3		1	1	2	0	1	1	2	0	0	1	0	0	0	1	0	1	3		4	3	1		2	2		2	2
May 17, 2021 4:06:46 PM	uuid:cf9bb6eb-2240-402f-90fa-5ae570d57c2e	13	15	2	Kibonkho	May 17, 2021	1222	1	18	1222	1	uuid:cf9bb6eb-2240-402f-90fa-5ae570d57c2e/household-information[1]	2	1	1	18	1	2		2		1	2	1	2	1	1	2	0	0	2	0	0	0	0	0	1	3		4	2	5	Net	2	2		2	2
May 17, 2021 4:11:04 PM	uuid:4a1684e6-b86b-4828-aab5-57468041c32f	14	16	2	Kibonkho	May 17, 2021	1223	1	52	1223	2	uuid:4a1684e6-b86b-4828-aab5-57468041c32f/household-information[1]	3	1	1	86	1	2		3		2		1	2	1	1	2	0	0	3	0	0	0	1	0	1	3		4	2	1		1	2		2	2
May 17, 2021 3:59:03 PM	uuid:09110424-ab72-404d-9e0a-d3c325493334	5	11	2	Kibonkho	May 17, 2021	1224	1	75	1224	1	uuid:09110424-ab72-404d-9e0a-d3c325493334/household-information[1]	2	1	1	75	1	0		3		1	2	2	0	1	1	2	0	0	2	0	0	0	2	0	1	3		3	1	2		2	2		2	2
May 17, 2021 4:12:55 PM	uuid:0e8dceb6-4d3d-4775-88bb-2723ee4af328	6	17	2	Kibonkho	May 17, 2021	1227	1	18	1227	3	uuid:0e8dceb6-4d3d-4775-88bb-2723ee4af328/household-information[2]	2	2	3	18	1	2		2		1	2	1	2	1	1	2	0	0	2	0	0	0	0	0	1	3		3	3	2		3	2		2	2
May 17, 2021 4:06:47 PM	uuid:fa3a4645-caf9-4079-847a-cfaeeeb898ce	13	15	2	Kibonkho	May 17, 2021	1229	1	60	1229	2	uuid:fa3a4645-caf9-4079-847a-cfaeeeb898ce/household-information[2]	5	2	2	60	2	0		3		1	2	2	0	1	1	2	0	2	3	0	0	0	0	0	1	3		4	2	2		2	2		2	2
May 17, 2021 4:11:05 PM	uuid:70d7230b-ce07-43d9-b138-370b35fdbeca	3	16	2	Kibonkho	May 17, 2021	1230	1	30	1230	3	uuid:70d7230b-ce07-43d9-b138-370b35fdbeca/household-information[2]	2	2	2	25	2	3		3		2		1	3	1	1	2	0	0	2	0	0	0	2	0	1	3		2	2	5	Net	1	5	Curtain	2	2
May 17, 2021 3:59:05 PM	uuid:83842769-0e32-45f3-85bd-6b3c5f235047	5	11	2	Kibonkho	May 17, 2021	1231	1	43	1231	2	uuid:83842769-0e32-45f3-85bd-6b3c5f235047/household-information[3]	3	3	3	21	1	2		5		1	1	1	2	1	1	2	0	0	3	0	0	0	3	0	1	3		1	4	2		2	3		2	2
May 17, 2021 4:01:30 PM	uuid:cc108c5b-0853-42d4-9977-bc7972df5605	2	12	2	Kibonkho	May 17, 2021	1232	1	30	1232	3	uuid:cc108c5b-0853-42d4-9977-bc7972df5605/household-information[1]	5	1	1	68	2	0		3		1	1	1	0	1	1	2	1	3	2	0	1	2	2	0	1	3		3	1	2		1	2		2	5
May 17, 2021 4:04:53 PM	uuid:caf47003-8eb9-41e1-96e6-82ba5d4e9017	4	14	2	Kibonkho	May 17, 2021	1235	1	40	1235	1	uuid:caf47003-8eb9-41e1-96e6-82ba5d4e9017/household-information[1]	2	1	1	28	1	3		2		1	1	1	2	1	1	2	0	0	2	0	0	0	2	0	1	3		4	4	2		2	2		2	5
May 17, 2021 4:11:06 PM	uuid:6f7a41d8-93f1-47af-9693-4f07f9a54dab	3	16	2	Kibonkho	May 17, 2021	1237	1	51	1237	1	uuid:6f7a41d8-93f1-47af-9693-4f07f9a54dab/household-information[1]	8	1	1	51	1	2		3		1	1	1	2	1	1	2	0	5	3	0	0	5	3	0	1	3		1	3	1		2	2		2	2
May 17, 2021 4:01:31 PM	uuid:22878741-3362-4f3f-ad46-78174c1f8578	7	12	2	Kibonkho	May 17, 2021	1239	1	45	1239	2	uuid:22878741-3362-4f3f-ad46-78174c1f8578/household-information[3]	8	3	3	21	2	2		3		1	1	1	0	1	1	2	2	1	4	0	2	1	4	0	1	3		4	4	2		1	2		2	2
May 17, 2021 4:03:56 PM	uuid:65b69581-f785-43c9-a28c-65289b35fdc8	10	13	2	Kibonkho	May 17, 2021	1240	1	64	1240	1	uuid:65b69581-f785-43c9-a28c-65289b35fdc8/household-information[6]	7	6	6	8	1	2		6	student	1	1	1	2	1	1	2	1	2	4	0	1	2	4	0	1	3		4	5	5	Net	2	3		2	2
May 17, 2021 4:01:34 PM	uuid:85351a4f-d9f9-431e-85e5-f808f42e6318	7	12	2	Kibonkho	May 17, 2021	1241	1	23	1241	3	uuid:85351a4f-d9f9-431e-85e5-f808f42e6318/household-information[9]	9	9	6	6	2	2		0		1	1	1	2	1	1	2	0	6	3	0	0	6	3	0	1	3		3	2	2		2	2		2	2
May 17, 2021 4:04:54 PM	uuid:07dd38d0-484f-4e41-a6c4-0f7e1f4db409	11	14	2	Kibonkho	May 17, 2021	1242	1	50	1242	1	uuid:07dd38d0-484f-4e41-a6c4-0f7e1f4db409/household-information[3]	4	3	3	16	1	3		0		1	1	1	2	1	1	2	0	2	2	0	0	2	2	0	1	3		3	2	2		2	2		2	2
May 17, 2021 4:06:49 PM	uuid:6cb49fc8-34d8-4f9b-aaa3-c9dc74c0aad7	13	15	2	Kibonkho	May 17, 2021	1243	1	37	1243	1	uuid:6cb49fc8-34d8-4f9b-aaa3-c9dc74c0aad7/household-information[1]	1	1	1	37	2	2		2		1	2	1	2	1	1	2	0	0	1	0	0	0	0	0	1	3		1	1	3		1	2		2	2
May 17, 2021 4:01:32 PM	uuid:08045af0-cb3f-4184-bb02-4729672189e0	2	12	2	Kibonkho	May 17, 2021	1246	1	20	1246	3	uuid:08045af0-cb3f-4184-bb02-4729672189e0/household-information[1]	2	1	1	63	2	0		3		1	1	2	0	1	1	2	0	0	2	0	0	0	2	0	1	3		5	2	2		1	2		2	2
May 17, 2021 4:03:57 PM	uuid:ca77e409-5a3b-4a15-bb80-46969eb04412	9	13	2	Kibonkho	May 17, 2021	1248	1	78	1248	1	uuid:ca77e409-5a3b-4a15-bb80-46969eb04412/household-information[2]	4	2	3	36	2	0		3		1	2	2	0	1	1	2	1	1	2	0	0	0	0	0	1	3		4	4	5	steel bar	2	5	Processed wood	2	5
May 17, 2021 4:04:57 PM	uuid:2482887c-412d-40dd-a979-cf5489ca6077	4	14	2	Kibonkho	May 17, 2021	1252	1	65	1252	3	uuid:2482887c-412d-40dd-a979-cf5489ca6077/household-information[6]	7	6	3	6	1	1		0		1	1	1	2	1	1	2	1	4	2	0	1	4	2	0	1	3		4	4	1		2	3		2	2
May 17, 2021 4:00:08 PM	uuid:258106b5-ce02-4771-bcac-08028dc616f2	5	11	2	Kibonkho	May 17, 2021	1254	1	69	1254	1	uuid:258106b5-ce02-4771-bcac-08028dc616f2/household-information[1]	2	1	1	69	2	0		3		1	1	2	0	1	1	2	0	0	2	0	0	0	2	0	1	3		4	2	3		1	2		2	2
May 17, 2021 4:06:51 PM	uuid:6b845e33-9240-4dc0-a37a-7e894d303664	13	15	2	Kibonkho	May 17, 2021	1257	1	40	1257	1	uuid:6b845e33-9240-4dc0-a37a-7e894d303664/household-information[2]	5	2	2	42	2	2		3		1	1	1	2	1	1	2	1	1	3	0	1	1	3	0	1	3		3	4	5	Net	2	2		2	5
May 17, 2021 4:11:09 PM	uuid:9a52b341-695b-428b-af73-42737749b1ec	3	16	2	Kibonkho	May 17, 2021	1258	1	54	1258	2	uuid:9a52b341-695b-428b-af73-42737749b1ec/household-information[2]	2	2	2	54	2	0		3		1	2	1	2	1	1	2	0	0	2	0	0	0	2	0	1	3		4	8	2		2	2		2	2
May 17, 2021 4:12:58 PM	uuid:4b6b26a8-6b56-47fc-96e1-690b64e16a26	6	17	2	Kibonkho	May 17, 2021	1262	1	48	1262	1	uuid:4b6b26a8-6b56-47fc-96e1-690b64e16a26/household-information[2]	3	2	2	45	2	0		3		1	1	1	2	1	1	2	0	0	3	0	0	0	3	0	1	3		4	3	1		2	2		2	2
May 17, 2021 4:06:53 PM	uuid:bbf0facb-e293-4f83-85cf-9b8c623045b9	13	15	2	Kibonkho	May 17, 2021	1264	1	54	1264	1	uuid:bbf0facb-e293-4f83-85cf-9b8c623045b9/household-information[1]	2	1	1	52	1	2		3		1	1	1	2	1	1	2	0	0	2	0	0	0	2	0	1	1		4	1	3		2	2		2	2
May 17, 2021 4:03:59 PM	uuid:a5aa6782-738c-445c-a107-419ebf1c80a2	9	13	2	Kibonkho	May 17, 2021	1266	1	41	1266	1	uuid:a5aa6782-738c-445c-a107-419ebf1c80a2/household-information[4]	7	4	3	12	1	2		6	student	1	1	1	2	2	2	2	1	3	3	0	1	3	3	0	1	3		4	4	5	steel bar	1	5	Processed wood	2	5
May 17, 2021 4:06:57 PM	uuid:020b9a0a-80b7-4709-8f41-6b4d60706b16	13	15	2	Kibonkho	May 17, 2021	1267	1	82	1267	1	uuid:020b9a0a-80b7-4709-8f41-6b4d60706b16/household-information[4]	6	4	6	6	1	0		0		1	2	1	0	1	1	2	1	2	3	0	0	0	0	0	1	3		4	2	5	Net	3	2		2	2
May 17, 2021 4:12:59 PM	uuid:86dcc6a5-ee75-4bd1-8f38-70e0d6b82c6c	16	17	2	Kibonkho	May 17, 2021	1270	1	76	1270	1	uuid:86dcc6a5-ee75-4bd1-8f38-70e0d6b82c6c/household-information[10]	11	10	3	29	2	2		3		1	1	1	3	2	1	2	1	2	8	0	1	2	8	0	2	3		4	2	2		1	2		2	2
May 17, 2021 4:06:54 PM	uuid:a3e98cee-e698-4cd0-ac16-078128d5a9f7	13	15	2	Kibonkho	May 17, 2021	1271	1	60	1271	1	uuid:a3e98cee-e698-4cd0-ac16-078128d5a9f7/household-information[1]	1	1	1	60	2	0		0		1	1	2	0	1	1	2	0	0	1	0	0	0	1	0	1	3		4	2	2		2	3		1	2
May 17, 2021 4:04:01 PM	uuid:dc329145-8bbe-4502-8841-712d4151dffb	10	13	2	Kibonkho	May 17, 2021	1274	1	81	1274	1	uuid:dc329145-8bbe-4502-8841-712d4151dffb/household-information[2]	2	2	6	16	1	3		6	student	1	1	2	0	1	1	2	0	1	1	0	0	1	1	0	1	3		4	3	5	steel bar	1	5	Processed wood	2	5
May 17, 2021 4:11:12 PM	uuid:f589fa4f-2c2b-42d2-9743-9093819fa555	3	16	2	Kibonkho	May 17, 2021	1278	1	25	1278	2	uuid:f589fa4f-2c2b-42d2-9743-9093819fa555/household-information[2]	5	2	2	25	2	2		3		1	2	1	2	1	1	2	1	2	2	0	0	0	0	0	1	3		1	2	4		1	2		2	2
May 17, 2021 4:13:02 PM	uuid:9d0cc0e0-fb77-4785-a4aa-7053aacb585e	16	17	2	Kibonkho	May 17, 2021	1281	1	25	1281	2	uuid:9d0cc0e0-fb77-4785-a4aa-7053aacb585e/household-information[4]	5	4	5	8	1	2		0		1	2	1	3	1	1	2	1	2	2	0	1	0	2	0	1	3		1	4	2		2	2		2	5
May 18, 2021 4:09:07 PM	uuid:69017e0d-7d7d-4c92-93a3-fc1ef3274a23	9	13	2	Mbuyu	May 18, 2021	1291	1	60	1291	1	uuid:69017e0d-7d7d-4c92-93a3-fc1ef3274a23/household-information[6]	6	6	6	3	1	0		0		1	2	1	2	4	2	2	1	1	4	0	0	0	1	0	3	3		4	2	5	steel bar	1	5	Processed wood	2	2
May 18, 2021 4:10:53 PM	uuid:2b6e1f82-34dc-4afb-8957-822c875a9ee5	11	14	2	Mbuyu	May 18, 2021	1294	1	20	1294	3	uuid:2b6e1f82-34dc-4afb-8957-822c875a9ee5/household-information[2]	2	2	2	30	2	2		3		1	1	1	2	1	1	2	0	0	2	0	0	0	2	0	1	3		4	1	1		1	3		2	2
May 18, 2021 4:14:40 PM	uuid:1d6d2651-f163-413a-82bd-61adcf13e66b	6	17	2	Mbuyu	May 18, 2021	1296	1	38	1296	2	uuid:1d6d2651-f163-413a-82bd-61adcf13e66b/household-information[7]	9	7	3	8	2	2		0		1	2	1	2	2	2	2	2	3	4	0	0	0	0	0	1	3		4	2	2		1	2		2	2
May 18, 2021 4:09:09 PM	uuid:99c2befc-6d12-400b-ba73-6709ad3d7eb6	10	13	2	Mbuyu	May 18, 2021	1299	1	28	1299	1	uuid:99c2befc-6d12-400b-ba73-6709ad3d7eb6/household-information[2]	5	2	2	23	2	3		3		1	1	1	3	1	1	2	2	0	3	0	2	0	2	0	1	3		4	2	2		2	0		2	2
May 18, 2021 4:14:46 PM	uuid:4b145058-f6de-47a7-a985-cfbd4879d49d	6	17	2	Mbuyu	May 18, 2021	1301	1	28	1301	2	uuid:4b145058-f6de-47a7-a985-cfbd4879d49d/household-information[2]	5	2	2	28	2	2		3		1	2	1	2	1	1	2	1	2	2	0	1	2	0	0	1	3		1	1	2		2	2		2	2
May 18, 2021 4:06:27 PM	uuid:8db82ae4-2204-48fe-b07d-51f64297d351	2	12	2	Mbuyu	May 18, 2021	1303	1	45	1303	3	uuid:8db82ae4-2204-48fe-b07d-51f64297d351/household-information[2]	3	2	2	35	2	2		3		1	2	1	2	1	1	2	1	0	2	0	0	0	0	0	1	3		4	4	2		2	2		2	2
May 18, 2021 4:10:54 PM	uuid:2edf4501-35ee-4174-b1d1-24b36960ccb1	4	14	2	Mbuyu	May 18, 2021	1306	1	20	1306	3	uuid:2edf4501-35ee-4174-b1d1-24b36960ccb1/household-information[2]	3	2	3	19	1	2		3		1	2	1	2	1	1	2	0	1	2	0	0	0	0	0	1	3		6	3	2		3	1		2	2
May 18, 2021 4:06:29 PM	uuid:6dfb47d5-c8f1-44e5-a2f4-25a6a732b2d4	2	12	2	Mbuyu	May 18, 2021	1309	1	59	1309	1	uuid:6dfb47d5-c8f1-44e5-a2f4-25a6a732b2d4/household-information[2]	3	2	3	18	2	2		0		1	2	1	2	1	1	2	0	2	1	0	0	0	0	0	1	3		4	1	2		1	2		2	2
May 18, 2021 4:04:16 PM	uuid:e83747d2-8e01-4cd4-97e1-2710ffabe648	3	16	2	Mbuyu	May 18, 2021	1310	1	70	1310	1	uuid:e83747d2-8e01-4cd4-97e1-2710ffabe648/household-information[2]	4	2	2	40	2	2		3		1	1	1	2	1	1	2	0	1	3	0	0	1	3	0	1	3		4	3	5	Net	2	2		2	6
May 18, 2021 4:10:57 PM	uuid:02199973-1290-4cb3-a61c-76500d65835a	11	14	2	Mbuyu	May 18, 2021	1312	1	49	1312	1	uuid:02199973-1290-4cb3-a61c-76500d65835a/household-information[2]	6	2	2	46	2	0		3		1	1	1	2	1	1	2	0	3	3	0	0	3	3	0	1	3		4	4	1		3	3		2	2
May 18, 2021 4:12:24 PM	uuid:61cd42c2-5e6e-48ee-aa87-f646b2cf5cc8	5	11	2	Mbuyu	May 18, 2021	1313	1	25	1313	3	uuid:61cd42c2-5e6e-48ee-aa87-f646b2cf5cc8/household-information[3]	4	3	4	22	1	2		3		1	2	1	2	1	1	2	0	0	4	0	0	0	2	0	1	3		1	2	2		1	2		2	2
May 18, 2021 4:10:58 PM	uuid:7de570ad-d0c8-4431-abbd-73fa7fbaffc0	4	14	2	Mbuyu	May 18, 2021	1320	1	46	1320	1	uuid:7de570ad-d0c8-4431-abbd-73fa7fbaffc0/household-information[1]	7	1	1	46	2	0		3		1	1	2	0	1	1	2	0	5	2	0	0	5	2	0	1	3		4	4	1		2	3		2	2
May 18, 2021 4:12:25 PM	uuid:e4623a0e-e222-45a7-aa2b-f3e4c7305b03	5	11	2	Mbuyu	May 18, 2021	1321	1	38	1321	1	uuid:e4623a0e-e222-45a7-aa2b-f3e4c7305b03/household-information[2]	7	2	2	31	2	2		3		1	1	1	2	2	1	2	1	4	2	0	1	4	2	0	2	3		4	1	2		1	3		2	2
May 18, 2021 4:09:12 PM	uuid:49a74072-f394-41d3-941f-b743d6323ae4	9	13	2	Mbuyu	May 18, 2021	1322	1	68	1322	1	uuid:49a74072-f394-41d3-941f-b743d6323ae4/household-information[9]	10	9	6	1	1	0		0		1	2	1	2	1	1	2	2	4	4	0	0	0	0	0	1	3		4	1	5	steel bar	2	3		2	2
May 18, 2021 4:06:31 PM	uuid:385c826f-b6c3-4bb4-8be9-a36502a8e70e	7	12	2	Mbuyu	May 18, 2021	1323	1	64	1323	1	uuid:385c826f-b6c3-4bb4-8be9-a36502a8e70e/household-information[1]	7	1	1	64	1	0		3		1	1	1	0	1	1	2	0	5	2	0	0	0	2	0	1	3		4	2	2		2	2		2	2
May 18, 2021 4:06:32 PM	uuid:a070c4ea-2ca1-44ad-9fcc-b6e53696b86f	2	12	2	Mbuyu	May 18, 2021	1325	1	34	1325	1	uuid:a070c4ea-2ca1-44ad-9fcc-b6e53696b86f/household-information[3]	9	3	3	7	1	2		0		1	2	1	2	1	1	2	3	2	4	0	3	2	4	0	1	3		4	4	2		2	2		2	2
May 19, 2021 1:21:35 PM	uuid:e660ee46-1d9b-4f85-8a94-1cc2e42e8ba9	7	12	2	Mkwazu	May 19, 2021	1328	1	46	1328	1	uuid:e660ee46-1d9b-4f85-8a94-1cc2e42e8ba9/household-information[1]	3	1	1	46	1	2		3		1	1	1	2	1	1	2	0	3	2	0	0	1	2	0	1	3		4	2	2		1	2		2	2
May 18, 2021 4:12:26 PM	uuid:eb1bf760-8178-4983-9a58-4bbb53ea0d70	5	11	2	Mbuyu	May 18, 2021	1329	1	38	1329	3	uuid:eb1bf760-8178-4983-9a58-4bbb53ea0d70/household-information[1]	2	1	1	65	2	2		3		1	1	1	2	1	1	2	0	0	2	0	0	0	2	0	1	3		4	4	3		1	3		2	5
May 19, 2021 1:12:07 PM	uuid:2358ab2b-1ffd-460d-93da-e0c9abc43938	10	13	2	Mkwazu	May 19, 2021	1331	1	43	1331	1	uuid:2358ab2b-1ffd-460d-93da-e0c9abc43938/household-information[3]	3	3	3	1	2	0		0		1	1	1	2	1	1	2	1	0	2	0	1	0	2	0	1	3		3	4	5	Net	1	3		2	2
May 19, 2021 1:17:23 PM	uuid:aee99409-2b80-421c-a545-284dbd7b21f4	11	14	2	Mkwazu	May 19, 2021	1333	1	73	1333	1	uuid:aee99409-2b80-421c-a545-284dbd7b21f4/household-information[3]	4	3	6	14	2	2		0		2		1	2	1	1	2	0	1	3	0	0	0	0	0	1	3		5	1	1		1	2		2	2
May 19, 2021 1:18:27 PM	uuid:af1403d7-914c-4f46-a28a-bf54dc97d78a	1	11	2	Mkwazu	May 19, 2021	1338	1	52	1338	2	uuid:af1403d7-914c-4f46-a28a-bf54dc97d78a/household-information[7]	7	7	6	1	2	0		0		1	1	1	2	1	1	2	1	2	4	1	1	2	4	1	1	3		4	4	3		3	5	Iron sheet	2	6
May 18, 2021 4:04:19 PM	uuid:b9a743fd-dd60-4884-9b9b-cfcb77cf7197	14	16	2	Mbuyu	May 18, 2021	1339	1	70	1339	1	uuid:b9a743fd-dd60-4884-9b9b-cfcb77cf7197/household-information[5]	9	5	3	37	1	2		3		1	2	1	2	1	1	2	0	3	6	0	0	3	3	0	1	3		2	6	5	Net	2	2		1	2
May 19, 2021 1:17:25 PM	uuid:543f2204-3597-4856-8637-4e258487ef12	11	14	2	Mkwazu	May 19, 2021	1342	1	50	1342	1	uuid:543f2204-3597-4856-8637-4e258487ef12/household-information[4]	6	4	3	10	1	2		0		1	1	1	2	1	1	2	1	3	2	0	1	3	2	0	1	3		4	4	2		2	2		2	6
May 19, 2021 1:11:37 PM	uuid:628a9e47-9c80-4882-b8cd-e5388a29abe4	14	16	2	Mkwazu	May 19, 2021	1344	1	66	1344	2	uuid:628a9e47-9c80-4882-b8cd-e5388a29abe4/household-information[4]	9	4	3	12	1	2		0		1	1	1	2	1	1	2	2	4	3	0	2	4	3	0	1	3		4	2	2		3	3		2	2
May 19, 2021 1:07:16 PM	uuid:9e5b00db-f84e-4d46-9d43-f21b78af6373	6	17	2	Mkwazu	May 19, 2021	1345	1	71	1345	1	uuid:9e5b00db-f84e-4d46-9d43-f21b78af6373/household-information[7]	7	7	6	12	2	2		0		1	1	2	1	1	1	2	1	2	4	0	1	2	4	0	1	3		4	4	2		2	2		2	2
May 19, 2021 1:07:17 PM	uuid:39738d74-fced-40c7-a576-953e1975835e	16	17	2	Mkwazu	May 19, 2021	1346	1	52	1346	1	uuid:39738d74-fced-40c7-a576-953e1975835e/household-information[1]	2	1	1	52	2	2		3		1	1	1	2	1	1	2	0	1	1	0	0	1	1	0	1	3		4	3	2		1	2		2	6
May 19, 2021 1:17:26 PM	uuid:c6239142-5723-4e94-8678-2b6279671fc3	4	14	2	Mkwazu	May 19, 2021	1350	1	44	1350	2	uuid:c6239142-5723-4e94-8678-2b6279671fc3/household-information[5]	6	5	6	10	2	2		0		1	1	1	2	1	1	2	0	4	2	0	0	4	2	0	1	3		4	3	2		3	1		2	2
May 19, 2021 1:11:38 PM	uuid:086208ec-e23e-4591-a327-96da79de4a39	3	16	2	Mkwazu	May 19, 2021	1353	1	40	1353	1	uuid:086208ec-e23e-4591-a327-96da79de4a39/household-information[1]	6	1	1	40	1	2		3		1	1	1	2	1	1	2	1	3	2	0	1	3	2	0	1	3		4	4	2		1	2		2	2
May 19, 2021 1:21:38 PM	uuid:a19fc0ee-f142-46f3-bd25-867c74e10848	2	12	2	Mkwazu	May 19, 2021	1354	1	27	1354	1	uuid:a19fc0ee-f142-46f3-bd25-867c74e10848/household-information[3]	3	3	3	2	1	0		1		1	1	1	2	1	1	2	1	0	2	0	1	0	2	0	1	3		3	3	2		1	2		2	2
May 19, 2021 1:12:12 PM	uuid:cf70b387-cf0c-40c4-b408-487e1640dc81	9	13	2	Mkwazu	May 19, 2021	1355	1	35	1355	1	uuid:cf70b387-cf0c-40c4-b408-487e1640dc81/household-information[4]	4	4	3	5	2	1		6	student	1	1	2	2	1	1	2	0	2	2	0	0	2	0	0	1	3		4	2	0		2	3		2	5
May 19, 2021 1:17:45 PM	uuid:6e18fac2-849e-40be-a35c-490848bb9d99	13	15	2	Mkwazu	May 19, 2021	1357	1	24	1357	2	uuid:6e18fac2-849e-40be-a35c-490848bb9d99/household-information[3]	4	3	6	20	1	2		3		1	1	2	0	1	1	2	1	0	3	0	1	0	3	0	1	3		6	4	5	steel bar	3	2		2	2
May 19, 2021 1:11:40 PM	uuid:f01a4e05-1fda-4634-befe-9151f02c1971	3	16	2	Mkwazu	May 19, 2021	1358	1	27	1358	3	uuid:f01a4e05-1fda-4634-befe-9151f02c1971/household-information[6]	6	6	6	11	1	2		0		1	2	1	0	1	1	2	1	1	4	0	1	0	1	0	1	3		4	3	0		1	2		2	2
May 25, 2021 8:44:09 AM	uuid:83339d9a-797e-4334-b3c9-253d1b406e9f	1	11	2	Mitindi	May 20, 2021	1360	1	84	1360	1	uuid:83339d9a-797e-4334-b3c9-253d1b406e9f/household-information[4]	8	4	3	25	2	2		3		1	1	1	2	1	1	2	1	2	5	0	1	2	5	0	1	3		4	4	2		2	2		2	2
May 19, 2021 1:21:39 PM	uuid:ff61de41-9392-4ef7-be9d-5994f9731128	7	12	2	Mkwazu	May 19, 2021	1361	1	40	1361	2	uuid:ff61de41-9392-4ef7-be9d-5994f9731128/household-information[3]	3	3	3	22	2	4		0		1	1	1	2	1	1	2	0	0	3	0	0	0	3	0	1	3		4	9	2		1	2		2	2
May 25, 2021 8:50:07 AM	uuid:c5566dda-c035-4423-9206-494d509af51a	16	17	2	Mitindi	May 20, 2021	1367	1	56	1367	1	uuid:c5566dda-c035-4423-9206-494d509af51a/household-information[2]	5	2	3	17	1	0		4		1	2	2	1	1	1	2	0	4	1	0	0	0	1	0	1	3		4	3	2		2	2		1	2
May 19, 2021 1:21:40 PM	uuid:c4693f25-1f3f-4019-93d5-6157707fb983	2	12	2	Mkwazu	May 19, 2021	1368	1	50	1368	1	uuid:c4693f25-1f3f-4019-93d5-6157707fb983/household-information[1]	4	1	1	50	1	2		3		1	1	1	2	1	1	2	0	0	4	0	0	0	4	0	1	3		6	11	5	Iron	1	5	Iron steel	2	6
May 19, 2021 1:12:15 PM	uuid:fe5dc653-ff0a-41ca-8be2-68638cc25ce6	9	13	2	Mkwazu	May 19, 2021	1369	1	42	1369	1	uuid:fe5dc653-ff0a-41ca-8be2-68638cc25ce6/household-information[3]	6	3	3	20	2	2		3		1	2	2	2	1	1	1	1	2	3	0	1	0	1	0	1	3		2	2	5	Net	2	5	Processed wood	2	6
May 19, 2021 1:07:20 PM	uuid:dda59bff-d581-4e43-97e5-972edd3eb9f2	6	17	2	Mkwazu	May 19, 2021	1373	1	44	1373	1	uuid:dda59bff-d581-4e43-97e5-972edd3eb9f2/household-information[5]	9	5	3	15	1	2		0		1	2	1	2	1	1	2	2	2	5	0	0	0	0	0	1	3		4	4	2		2	2		2	2
May 25, 2021 8:48:31 AM	uuid:a28f443f-2da7-489f-88ec-0862e77c4297	10	13	2	Mitindi	May 20, 2021	1377	1	70	1377	1	uuid:a28f443f-2da7-489f-88ec-0862e77c4297/household-information[2]	2	2	2	65	2	0		3		1	1	1	2	1	1	2	0	0	2	0	0	0	2	0	1	3		4	4	0		2	5	Processed wood	2	2
May 25, 2021 8:31:10 AM	uuid:de85980e-a179-4dcf-af2c-87d9b43c1874	4	14	2	Mitindi	May 20, 2021	1378	1	39	1378	1	uuid:de85980e-a179-4dcf-af2c-87d9b43c1874/household-information[5]	5	5	3	10	2	2		0		1	1	1	0	1	1	2	0	3	2	0	0	3	2	0	1	3		4	2	1		2	2		2	2
May 25, 2021 8:31:11 AM	uuid:ff5fc2ad-5a6e-4ea5-a2d8-037b04851d30	4	14	2	Mitindi	May 20, 2021	1381	1	70	1381	2	uuid:ff5fc2ad-5a6e-4ea5-a2d8-037b04851d30/household-information[3]	5	3	3	25	1	2		3		1	1	1	2	1	1	2	0	0	5	0	0	0	5	0	1	3		1	5	3		2	3		2	6
5/25/2021 8:44	uuid:804ed29a-8684-4249-9256-0ea89ac1084a	5	11	3	Kudigongo	24-May-21	1384	1	61	1384	1	uuid:804ed29a-8684-4249-9256-0ea89ac1084a/household-information[2]	3	2	2	62	2	2		3		1	1	1	2	1	1	2	0	1	2	0	0	1	2	0	1	3		4	1	2		1	2		2	2
May 25, 2021 8:31:12 AM	uuid:987e9a40-da29-4058-9dc6-c2863b650717	4	14	2	Mitindi	May 20, 2021	1386	1	32	1386	1	uuid:987e9a40-da29-4058-9dc6-c2863b650717/household-information[4]	4	4	3	1	1	0		0		1	1	2	0	1	1	2	1	2	1	0	1	2	1	0	1	3		4	2	2		1	2		2	2
5/25/2021 8:48	uuid:8653dff5-a32f-45d2-ac08-e611e85734ef	9	13	3	Kudigongo	24-May-21	1388	1	46	1388	1	uuid:8653dff5-a32f-45d2-ac08-e611e85734ef/household-information[7]	7	7	6	4	1	0		0		1	1	1	2	1	1	2	1	3	3	0	1	3	3	0	1	3		4	3	5	steel bar	2	5	Processed wood	2	2
May 19, 2021 1:12:31 PM	uuid:1dac45a9-23c9-4209-b75b-5e8b71cf86a0	9	13	2	Mkwazu	May 19, 2021	1390	1	49	1390	1	uuid:1dac45a9-23c9-4209-b75b-5e8b71cf86a0/household-information[5]	8	5	3	9	1	2		6	student	1	2	1	2	1	1	2	1	3	4	0	1	3	4	0	1	3		4	1	1		2	3		2	2
5/25/2021 8:50	uuid:7c9aa5d4-d9bb-45aa-bf55-22f2e4dff13b	16	17	3	Kudigongo	24-May-21	1395	1	79	1395	1	uuid:7c9aa5d4-d9bb-45aa-bf55-22f2e4dff13b/household-information[2]	2	2	2	75	2	2		3		1	2	1	2	1	1	2	0	0	2	0	0	0	0	0	1	3		4	4	2		2	2		2	2
5/25/2021 8:44	uuid:ca3d3244-aa2c-4955-8c7b-f1696a2f85bc	5	11	3	Kudigongo	24-May-21	1396	1	25	1396	2	uuid:ca3d3244-aa2c-4955-8c7b-f1696a2f85bc/household-information[5]	5	5	3	2	2	0		0		1	1	1	2	1	1	2	1	2	2	0	1	2	2	0	1	3		4	2	5	steel bar	2	2		2	2
5/25/2021 8:48	uuid:bd26c588-3578-4457-89d1-9aa6d59e37e7	10	13	3	Kudigongo	24-May-21	1398	1	32	1398	1	uuid:bd26c588-3578-4457-89d1-9aa6d59e37e7/household-information[5]	5	5	3	6	2	2		6	student	1	1	1	3	1	1	2	0	3	2	0	0	3	2	0	1	3		4	4	5	steel bar	2	5	Processed wood	2	6
5/25/2021 8:44	uuid:49c38ae3-8515-46bd-85d8-1fca28d246ff	5	11	3	Kudigongo	24-May-21	1403	1	27	1403	1	uuid:49c38ae3-8515-46bd-85d8-1fca28d246ff/household-information[3]	3	3	3	1	1	0		0		1	1	1	2	1	1	2	2	0	1	0	2	0	1	0	1	3		4	1	2		2	2		2	2
5/25/2021 8:37	uuid:146297fb-8b0b-41fd-8307-42ae7417767b	11	14	3	Kudigongo	24-May-21	1406	1	80	1406	1	uuid:146297fb-8b0b-41fd-8307-42ae7417767b/household-information[2]	4	2	6	17	1	3		0		1	1	1	2	1	1	2	0	3	1	0	0	3	1	0	1	3		4	8	2		2	2		2	5
5/25/2021 8:50	uuid:77221deb-a1ef-4125-8844-1867e199b266	7	12	3	Kudigongo	24-May-21	1411	1	40	1411	3	uuid:77221deb-a1ef-4125-8844-1867e199b266/household-information[6]	6	6	6	1	2	0		0		1	1	1	2	1	1	2	1	3	2	0	1	3	2	0	1	3		4	4	2		2	2		2	2
5/25/2021 8:48	uuid:8319c7b0-f077-43ec-9c15-098810df4423	10	13	3	Kudigongo	24-May-21	1412	1	45	1412	1	uuid:8319c7b0-f077-43ec-9c15-098810df4423/household-information[1]	3	1	1	45	2	2		3		1	1	1	2	1	1	2	0	2	1	0	0	2	1	0	1	3		4	2	5	steel bar	1	5	Processed wood	2	2
5/25/2021 8:42	uuid:a64ec432-cddb-47f2-8ade-d689ece61907	13	15	3	Kudigongo	24-May-21	1414	1	60	1414	1	uuid:a64ec432-cddb-47f2-8ade-d689ece61907/household-information[2]	2	2	12	40	1	2		3		1	1	1	2	1	1	2	0	0	2	0	0	0	2	0	1	3		4	4	2		2	2		1	2
5/25/2021 8:45	uuid:4e9ca6d0-61ac-4f1a-881a-2f1d4e50cd17	14	16	3	Kudigongo	24-May-21	1415	1	68	1415	1	uuid:4e9ca6d0-61ac-4f1a-881a-2f1d4e50cd17/household-information[3]	3	3	6	14	1	2		0		1	1	1	2	1	1	2	0	2	1	0	0	2	1	0	1	3		4	5	0		2	2		2	2
5/25/2021 8:50	uuid:d91a6c99-d99a-4c6b-94b2-acaeb156009e	16	17	3	Kudigongo	24-May-21	1416	1	28	1416	1	uuid:d91a6c99-d99a-4c6b-94b2-acaeb156009e/household-information[1]	1	1	1	28	1	3		2		1	2	1	3	1	1	2	0	0	1	0	0	0	0	0	1	3		4	4	2		2	2		2	2
5/25/2021 8:44	uuid:77d00540-ece0-4261-9ac7-c543a33616b1	5	11	3	Kudigongo	24-May-21	1417	1	69	1417	1	uuid:77d00540-ece0-4261-9ac7-c543a33616b1/household-information[4]	5	4	3	27	2	3		3		1	1	1	2	1	1	2	0	1	4	0	0	1	4	0	1	3		1	4	2		2	2		1	2
5/25/2021 8:50	uuid:84884f63-85f6-492d-bda4-9ab5d6323a5d	2	12	3	Kudigongo	24-May-21	1418	1	41	1418	2	uuid:84884f63-85f6-492d-bda4-9ab5d6323a5d/household-information[1]	5	1	1	69	1	2		3		1	1	1	2	1	1	2	0	3	2	0	0	3	2	0	1	3		4	2	2		2	2		2	2
5/25/2021 8:48	uuid:89f99688-852e-4ffb-aca8-a63f67842d1d	9	13	3	Kudigongo	24-May-21	1419	1	60	1419	1	uuid:89f99688-852e-4ffb-aca8-a63f67842d1d/household-information[1]	2	1	1	60	2	2		2		1	1	1	2	1	1	2	0	0	2	0	0	0	2	0	1	3		4	3	5	steel bar	1	5	Processed wood	2	2
5/25/2021 8:42	uuid:8d145091-9b74-474b-876c-e863dc14cb04	13	15	3	Kudigongo	24-May-21	1421	1	75	1421	1	uuid:8d145091-9b74-474b-876c-e863dc14cb04/household-information[3]	3	3	6	14	1	2		0		1	1	1	2	1	1	2	0	2	1	0	0	2	1	0	1	3		4	4	5	Net	2	2		2	2
5/25/2021 8:45	uuid:d8eab90d-dba1-44ce-9b16-1290be5f137b	3	16	3	Kudigongo	24-May-21	1422	1	86	1422	1	uuid:d8eab90d-dba1-44ce-9b16-1290be5f137b/household-information[1]	1	1	1	86	1	2		3		1	1	1	2	1	1	2	0	0	1	0	0	0	1	0	1	3		4	7	0		2	2		2	2
5/25/2021 8:50	uuid:3e533052-b41f-4734-9f7a-96df84051da4	16	17	3	Kudigongo	24-May-21	1423	1	27	1423	2	uuid:3e533052-b41f-4734-9f7a-96df84051da4/household-information[2]	4	2	2	27	2	2		3		1	1	1	3	1	1	2	1	1	2	0	1	1	2	0	1	1		2	2	2		1	2		2	2
5/25/2021 8:48	uuid:86f248c3-48b9-4a06-b003-0979ccc3b5b8	10	13	3	Kudigongo	24-May-21	1426	1	65	1426	1	uuid:86f248c3-48b9-4a06-b003-0979ccc3b5b8/household-information[1]	1	1	1	65	1	2		3		1	1	1	2	1	1	2	0	0	1	0	0	0	1	0	1	3		4	2	5	steel bar	2	5	Processed wood	2	2
5/25/2021 8:42	uuid:f2d8c963-b389-4d6b-805f-ab8655afd7cc	13	15	3	Kudigongo	24-May-21	1428	1	70	1428	1	uuid:f2d8c963-b389-4d6b-805f-ab8655afd7cc/household-information[1]	2	1	1	70	1	2		3		1	2	1	2	1	1	2	0	0	2	0	0	0	0	0	1	3		4	4	5	Net	2	2		2	2
5/25/2021 8:37	uuid:b009960f-c45b-4f6a-9a43-2deb8a8d11f9	4	14	3	Kudigongo	25-May-21	1429	1	61	1429	1	uuid:b009960f-c45b-4f6a-9a43-2deb8a8d11f9/household-information[1]	1	1	1	61	2	2		3		1	1	1	2	1	1	2	0	0	1	0	0	0	1	0	1	3		4	2	2		2	2		2	2
5/25/2021 8:50	uuid:bd23cf89-8380-4e3b-9ce9-005827ab43ff	16	17	3	Kudigongo	25-May-21	1432	1	23	1432	3	uuid:bd23cf89-8380-4e3b-9ce9-005827ab43ff/household-information[2]	5	2	2	50	2	2		3		1	1	1	2	1	1	2	1	0	4	0	1	0	4	0	1	3		4	3	2		1	2		2	2
5/25/2021 8:50	uuid:6f5a977a-eb11-4a16-8989-cfb670f9db55	7	12	3	Kudigongo	25-May-21	1436	1	32	1436	2	uuid:6f5a977a-eb11-4a16-8989-cfb670f9db55/household-information[3]	3	3	3	4	2	0		0		1	1	1	2	1	1	2	4	0	2	0	1	0	2	0	1	3		4	4	2		2	2		2	2
5/25/2021 8:50	uuid:bba36ce1-cef9-4111-9d5d-5b141791eee7	6	17	3	Kudigongo	25-May-21	1441	1	63	1441	2	uuid:bba36ce1-cef9-4111-9d5d-5b141791eee7/household-information[5]	6	5	6	13	2	2		6	student	1	1	1	2	1	1	2	0	2	4	0	0	2	2	0	1	3		4	6	2		2	2		2	2
5/25/2021 8:44	uuid:ac747e53-197e-41e6-9c00-5359d87f1c0b	5	11	3	Kudigongo	25-May-21	1442	1	52	1442	2	uuid:ac747e53-197e-41e6-9c00-5359d87f1c0b/household-information[2]	2	2	2	52	2	2		3		1	1	1	2	1	1	1	0	0	2	0	0	0	2	0	1	3		4	2	3		2	3		2	2
5/25/2021 8:50	uuid:58650ce2-ef11-4080-b2f4-4efb97194a0e	2	12	3	Kudigongo	25-May-21	1443	1	60	1443	1	uuid:58650ce2-ef11-4080-b2f4-4efb97194a0e/household-information[5]	7	5	3	7	1	2		0		1	1	1	2	1	1	2	0	4	3	0	0	4	3	0	1	3		4	4	2		2	2		2	2
5/25/2021 8:37	uuid:090c8b48-c287-4d4c-912e-e833b9ecccac	4	14	3	Kudigongo	25-May-21	1445	1	31	1445	2	uuid:090c8b48-c287-4d4c-912e-e833b9ecccac/household-information[2]	4	2	2	31	2	2		3		1	2	1	2	1	1	1	1	1	2	0	0	0	0	0	1	3		4	1	1		1	2		2	2
5/25/2021 8:42	uuid:cf424a22-5911-4aaf-8c56-712c94543f84	13	15	3	Kudigongo	25-May-21	1446	1	45	1446	1	uuid:cf424a22-5911-4aaf-8c56-712c94543f84/household-information[4]	4	4	3	10	2	2		0		1	2	1	2	1	1	2	0	3	1	0	0	0	0	0	1	3		4	4	2		2	2		2	2
5/25/2021 8:50	uuid:36b21b54-d2ad-4a95-b1f5-23d951d3b71a	16	17	3	Kudigongo	25-May-21	1448	1	76	1448	2	uuid:36b21b54-d2ad-4a95-b1f5-23d951d3b71a/household-information[1]	2	1	1	78	1	3		3		1	1	1	3	1	1	2	0	0	2	0	0	0	2	0	1	3		4	3	1		2	2		2	2
5/25/2021 8:50	uuid:47447ff5-97bf-4856-8762-57ce8b9e502c	7	12	3	Kudigongo	25-May-21	1450	1	38	1450	3	uuid:47447ff5-97bf-4856-8762-57ce8b9e502c/household-information[5]	14	5	3	24	2	2		3		1	1	2	0	1	1	2	1	8	5	0	1	8	5	0	1	3		4	4	2		2	2		2	2
May 9, 2021 8:42:25 AM	uuid:03bff7b2-68f1-4bf0-be6d-4e1c6ea20aaa	5	11	1	Miembe Saba	May 6, 2021	1002	1	62	1002	1	uuid:03bff7b2-68f1-4bf0-be6d-4e1c6ea20aaa/household-information[4]	5	4	3	30	2	2		0		2		2	1	1	1	2	0	0	2	0	0	0	2	0	1	3		4	4	1		2	2		2	2
May 9, 2021 8:42:25 AM	uuid:03bff7b2-68f1-4bf0-be6d-4e1c6ea20aaa	5	11	1	Miembe Saba	May 6, 2021	1002	1	62	1002	1	uuid:03bff7b2-68f1-4bf0-be6d-4e1c6ea20aaa/household-information[5]	5	5	3	20	2	2		0		2		2	1	1	1	2	0	0	2	0	0	0	2	0	1	3		4	4	1		2	2		2	2
May 9, 2021 8:42:25 AM	uuid:03bff7b2-68f1-4bf0-be6d-4e1c6ea20aaa	5	11	1	Miembe Saba	May 6, 2021	1002	1	62	1002	1	uuid:03bff7b2-68f1-4bf0-be6d-4e1c6ea20aaa/household-information[1]	5	1	1	62	2	1		3		1	1	2	1	1	1	2	0	0	2	0	0	0	2	0	1	3		4	4	1		2	2		2	2
May 9, 2021 8:42:25 AM	uuid:03bff7b2-68f1-4bf0-be6d-4e1c6ea20aaa	5	11	1	Miembe Saba	May 6, 2021	1002	1	62	1002	1	uuid:03bff7b2-68f1-4bf0-be6d-4e1c6ea20aaa/household-information[3]	5	3	3	41	2	2		3		1	1	2	1	1	1	2	0	0	2	0	0	0	2	0	1	3		4	4	1		2	2		2	2
May 9, 2021 8:42:25 AM	uuid:03bff7b2-68f1-4bf0-be6d-4e1c6ea20aaa	5	11	1	Miembe Saba	May 6, 2021	1002	1	62	1002	1	uuid:03bff7b2-68f1-4bf0-be6d-4e1c6ea20aaa/household-information[2]	5	2	3	44	1	2		3		1	1	2	1	1	1	2	0	0	2	0	0	0	2	0	1	3		4	4	1		2	2		2	2
May 16, 2021 7:00:46 PM	uuid:9ed847a1-7f9d-4eee-8a1b-935e34be0ff7	5	11	1	Miembe Saba	May 6, 2021	1003	1	60	1003	1	uuid:9ed847a1-7f9d-4eee-8a1b-935e34be0ff7/household-information[1]	4	1	1	60	2	0		0		1	1	2	0	1	1	2	0	0	4	0	0	0	4	0	1	3		4	8	2		2	2		2	5
May 16, 2021 7:00:46 PM	uuid:9ed847a1-7f9d-4eee-8a1b-935e34be0ff7	5	11	1	Miembe Saba	May 6, 2021	1003	1	60	1003	1	uuid:9ed847a1-7f9d-4eee-8a1b-935e34be0ff7/household-information[3]	4	3	3	56	1	2		5		1	1	2	0	1	1	2	0	0	4	0	0	0	4	0	1	3		4	8	2		2	2		2	5
May 16, 2021 7:00:46 PM	uuid:9ed847a1-7f9d-4eee-8a1b-935e34be0ff7	5	11	1	Miembe Saba	May 6, 2021	1003	1	60	1003	1	uuid:9ed847a1-7f9d-4eee-8a1b-935e34be0ff7/household-information[2]	4	2	3	50	1	2		3		1	1	2	0	1	1	2	0	0	4	0	0	0	4	0	1	3		4	8	2		2	2		2	5
May 16, 2021 7:00:46 PM	uuid:9ed847a1-7f9d-4eee-8a1b-935e34be0ff7	5	11	1	Miembe Saba	May 6, 2021	1003	1	60	1003	1	uuid:9ed847a1-7f9d-4eee-8a1b-935e34be0ff7/household-information[4]	4	4	3	37	2	2		3		1	1	2	0	1	1	2	0	0	4	0	0	0	4	0	1	3		4	8	2		2	2		2	5
May 16, 2021 7:00:47 PM	uuid:34520f9e-ad2d-4d8b-a16e-5cd0f932cc5e	5	11	1	Miembe Saba	May 6, 2021	1004	1	75	1004	1	uuid:34520f9e-ad2d-4d8b-a16e-5cd0f932cc5e/household-information[1]	2	1	1	75	2	1		2		1	2	1	1	1	1	2	0	0	2	0	0	0	0	0	1	3		4	2	2		2	2		2	2
May 16, 2021 7:00:50 PM	uuid:f064ba0b-e7fc-45ac-aef1-120d05346c71	5	11	1	Miembe Saba	May 6, 2021	1006	1	35	1006	1	uuid:f064ba0b-e7fc-45ac-aef1-120d05346c71/household-information[6]	7	6	3	3	1	0		0		1	1	2	0	1	1	2	2	4	1	0	2	4	1	0	1	3		4	3	1		2	2		2	2
May 16, 2021 7:00:50 PM	uuid:f064ba0b-e7fc-45ac-aef1-120d05346c71	5	11	1	Miembe Saba	May 6, 2021	1006	1	35	1006	1	uuid:f064ba0b-e7fc-45ac-aef1-120d05346c71/household-information[3]	7	3	3	10	2	2		0		1	1	2	0	1	1	2	2	4	1	0	2	4	1	0	1	3		4	3	1		2	2		2	2
May 16, 2021 7:00:50 PM	uuid:f064ba0b-e7fc-45ac-aef1-120d05346c71	5	11	1	Miembe Saba	May 6, 2021	1006	1	35	1006	1	uuid:f064ba0b-e7fc-45ac-aef1-120d05346c71/household-information[2]	7	2	3	17	2	2		3		1	1	2	0	1	1	2	2	4	1	0	2	4	1	0	1	3		4	3	1		2	2		2	2
May 16, 2021 7:00:50 PM	uuid:f064ba0b-e7fc-45ac-aef1-120d05346c71	5	11	1	Miembe Saba	May 6, 2021	1006	1	35	1006	1	uuid:f064ba0b-e7fc-45ac-aef1-120d05346c71/household-information[1]	7	1	1	35	2	0		3		1	1	2	0	1	1	2	2	4	1	0	2	4	1	0	1	3		4	3	1		2	2		2	2
May 16, 2021 7:00:50 PM	uuid:f064ba0b-e7fc-45ac-aef1-120d05346c71	5	11	1	Miembe Saba	May 6, 2021	1006	1	35	1006	1	uuid:f064ba0b-e7fc-45ac-aef1-120d05346c71/household-information[5]	7	5	3	6	2	2		0		1	1	2	0	1	1	2	2	4	1	0	2	4	1	0	1	3		4	3	1		2	2		2	2
May 16, 2021 7:00:50 PM	uuid:f064ba0b-e7fc-45ac-aef1-120d05346c71	5	11	1	Miembe Saba	May 6, 2021	1006	1	35	1006	1	uuid:f064ba0b-e7fc-45ac-aef1-120d05346c71/household-information[7]	7	7	3	0	1	0		0		1	1	2	0	1	1	2	2	4	1	0	2	4	1	0	1	3		4	3	1		2	2		2	2
May 16, 2021 7:00:53 PM	uuid:e13d27de-84f9-4667-a2f5-d38e3f64f342	5	11	1	Miembe Saba	May 7, 2021	1008	1	28	1008	2	uuid:e13d27de-84f9-4667-a2f5-d38e3f64f342/household-information[4]	4	4	3	3	2	0		0		1	1	1	2	1	1	2	1	1	2	0	1	1	2	0	1	3		4	2	2		1	2		2	2
May 16, 2021 7:00:53 PM	uuid:e13d27de-84f9-4667-a2f5-d38e3f64f342	5	11	1	Miembe Saba	May 7, 2021	1008	1	28	1008	2	uuid:e13d27de-84f9-4667-a2f5-d38e3f64f342/household-information[1]	4	1	1	35	1	2		3		1	1	1	2	1	1	2	1	1	2	0	1	1	2	0	1	3		4	2	2		1	2		2	2
May 16, 2021 7:00:53 PM	uuid:e13d27de-84f9-4667-a2f5-d38e3f64f342	5	11	1	Miembe Saba	May 7, 2021	1008	1	28	1008	2	uuid:e13d27de-84f9-4667-a2f5-d38e3f64f342/household-information[3]	4	3	3	9	2	2		0		1	1	1	2	1	1	2	1	1	2	0	1	1	2	0	1	3		4	2	2		1	2		2	2
May 16, 2021 7:00:53 PM	uuid:e13d27de-84f9-4667-a2f5-d38e3f64f342	5	11	1	Miembe Saba	May 7, 2021	1008	1	28	1008	2	uuid:e13d27de-84f9-4667-a2f5-d38e3f64f342/household-information[2]	4	2	2	28	2	2		3		1	1	1	2	1	1	2	1	1	2	0	1	1	2	0	1	3		4	2	2		1	2		2	2
May 16, 2021 7:00:54 PM	uuid:a7b5b850-37aa-4028-b11d-c80d95b27b7f	5	11	1	Miembe Saba	May 7, 2021	1009	1	31	1009	1	uuid:a7b5b850-37aa-4028-b11d-c80d95b27b7f/household-information[2]	6	2	11	48	2	0		3		1	1	2	1	1	1	2	0	3	3	0	0	3	3	0	1	3		4	4	2		2	2		2	2
May 16, 2021 7:00:54 PM	uuid:a7b5b850-37aa-4028-b11d-c80d95b27b7f	5	11	1	Miembe Saba	May 7, 2021	1009	1	31	1009	1	uuid:a7b5b850-37aa-4028-b11d-c80d95b27b7f/household-information[4]	6	4	4	14	1	2		3		1	1	2	1	1	1	2	0	3	3	0	0	3	3	0	1	3		4	4	2		2	2		2	2
May 16, 2021 7:00:54 PM	uuid:a7b5b850-37aa-4028-b11d-c80d95b27b7f	5	11	1	Miembe Saba	May 7, 2021	1009	1	31	1009	1	uuid:a7b5b850-37aa-4028-b11d-c80d95b27b7f/household-information[5]	6	5	4	10	2	2		0		1	1	2	1	1	1	2	0	3	3	0	0	3	3	0	1	3		4	4	2		2	2		2	2
May 16, 2021 7:00:54 PM	uuid:a7b5b850-37aa-4028-b11d-c80d95b27b7f	5	11	1	Miembe Saba	May 7, 2021	1009	1	31	1009	1	uuid:a7b5b850-37aa-4028-b11d-c80d95b27b7f/household-information[1]	6	1	1	31	2	1		3		1	1	2	1	1	1	2	0	3	3	0	0	3	3	0	1	3		4	4	2		2	2		2	2
May 16, 2021 7:00:54 PM	uuid:a7b5b850-37aa-4028-b11d-c80d95b27b7f	5	11	1	Miembe Saba	May 7, 2021	1009	1	31	1009	1	uuid:a7b5b850-37aa-4028-b11d-c80d95b27b7f/household-information[3]	6	3	4	20	2	3		3		1	1	2	1	1	1	2	0	3	3	0	0	3	3	0	1	3		4	4	2		2	2		2	2
May 16, 2021 7:00:54 PM	uuid:a7b5b850-37aa-4028-b11d-c80d95b27b7f	5	11	1	Miembe Saba	May 7, 2021	1009	1	31	1009	1	uuid:a7b5b850-37aa-4028-b11d-c80d95b27b7f/household-information[6]	6	6	3	7	2	2		0		1	1	2	1	1	1	2	0	3	3	0	0	3	3	0	1	3		4	4	2		2	2		2	2
May 16, 2021 7:00:55 PM	uuid:5546a3ef-3e0c-41e5-9b86-a486b3675bdf	1	11	1	Mswelezi	May 10, 2021	1010	1	25	1010	2	uuid:5546a3ef-3e0c-41e5-9b86-a486b3675bdf/household-information[4]	4	4	3	1	1	0		0		1	1	1	2	1	1	2	2	0	2	0	2	0	2	0	1	1		4	1	2		1	3		2	2
May 16, 2021 7:00:55 PM	uuid:5546a3ef-3e0c-41e5-9b86-a486b3675bdf	1	11	1	Mswelezi	May 10, 2021	1010	1	25	1010	2	uuid:5546a3ef-3e0c-41e5-9b86-a486b3675bdf/household-information[2]	4	2	2	25	2	2		3		1	1	1	2	1	1	2	2	0	2	0	2	0	2	0	1	1		4	1	2		1	3		2	2
May 16, 2021 7:00:55 PM	uuid:5546a3ef-3e0c-41e5-9b86-a486b3675bdf	1	11	1	Mswelezi	May 10, 2021	1010	1	25	1010	2	uuid:5546a3ef-3e0c-41e5-9b86-a486b3675bdf/household-information[3]	4	3	3	3	2	0		0		1	1	1	2	1	1	2	2	0	2	0	2	0	2	0	1	1		4	1	2		1	3		2	2
May 16, 2021 7:00:55 PM	uuid:5546a3ef-3e0c-41e5-9b86-a486b3675bdf	1	11	1	Mswelezi	May 10, 2021	1010	1	25	1010	2	uuid:5546a3ef-3e0c-41e5-9b86-a486b3675bdf/household-information[1]	4	1	1	41	1	2		3		1	1	1	2	1	1	2	2	0	2	0	2	0	2	0	1	1		4	1	2		1	3		2	2
May 16, 2021 6:57:14 PM	uuid:8f33f84e-6fab-463f-8f9f-3459a0025f34	2	12	1	Miembe Saba	May 6, 2021	1011	1	63	1011	2	uuid:8f33f84e-6fab-463f-8f9f-3459a0025f34/household-information[3]	6	3	6	14	2	2		0		1	2	2	1	1	1	2	0	4	2	0	0	0	1	0	1	3		2	4	1		2	2		2	2
May 16, 2021 6:57:14 PM	uuid:8f33f84e-6fab-463f-8f9f-3459a0025f34	2	12	1	Miembe Saba	May 6, 2021	1011	1	63	1011	2	uuid:8f33f84e-6fab-463f-8f9f-3459a0025f34/household-information[5]	6	5	6	11	2	2		0		1	2	2	1	1	1	2	0	4	2	0	0	0	1	0	1	3		2	4	1		2	2		2	2
May 16, 2021 6:57:14 PM	uuid:8f33f84e-6fab-463f-8f9f-3459a0025f34	2	12	1	Miembe Saba	May 6, 2021	1011	1	63	1011	2	uuid:8f33f84e-6fab-463f-8f9f-3459a0025f34/household-information[1]	6	1	1	63	2	1		3		1	1	2	1	1	1	2	0	4	2	0	0	0	1	0	1	3		2	4	1		2	2		2	2
May 16, 2021 6:57:14 PM	uuid:8f33f84e-6fab-463f-8f9f-3459a0025f34	2	12	1	Miembe Saba	May 6, 2021	1011	1	63	1011	2	uuid:8f33f84e-6fab-463f-8f9f-3459a0025f34/household-information[4]	6	4	6	13	1	2		0		1	2	2	1	1	1	2	0	4	2	0	0	0	1	0	1	3		2	4	1		2	2		2	2
May 16, 2021 6:57:14 PM	uuid:8f33f84e-6fab-463f-8f9f-3459a0025f34	2	12	1	Miembe Saba	May 6, 2021	1011	1	63	1011	2	uuid:8f33f84e-6fab-463f-8f9f-3459a0025f34/household-information[6]	6	6	6	11	1	2		0		1	2	2	1	1	1	2	0	4	2	0	0	0	1	0	1	3		2	4	1		2	2		2	2
May 16, 2021 6:57:14 PM	uuid:8f33f84e-6fab-463f-8f9f-3459a0025f34	2	12	1	Miembe Saba	May 6, 2021	1011	1	63	1011	2	uuid:8f33f84e-6fab-463f-8f9f-3459a0025f34/household-information[2]	6	2	3	18	1	2		3		1	2	2	1	1	1	2	0	4	2	0	0	0	1	0	1	3		2	4	1		2	2		2	2
May 16, 2021 6:57:16 PM	uuid:1826eda7-967d-4fa3-b478-a748f0752d91	7	12	1	Miembe Saba	May 6, 2021	1012	1	28	1012	3	uuid:1826eda7-967d-4fa3-b478-a748f0752d91/household-information[2]	3	2	6	7	1	1		0		1	1	1	2	1	1	2	1	1	1	0	1	1	1	0	1	3		2	2	2		2	2		2	2
May 16, 2021 6:57:16 PM	uuid:1826eda7-967d-4fa3-b478-a748f0752d91	7	12	1	Miembe Saba	May 6, 2021	1012	1	28	1012	3	uuid:1826eda7-967d-4fa3-b478-a748f0752d91/household-information[1]	3	1	1	28	2	2		3		1	1	1	2	1	1	2	1	1	1	0	1	1	1	0	1	3		2	2	2		2	2		2	2
May 16, 2021 6:57:16 PM	uuid:1826eda7-967d-4fa3-b478-a748f0752d91	7	12	1	Miembe Saba	May 6, 2021	1012	1	28	1012	3	uuid:1826eda7-967d-4fa3-b478-a748f0752d91/household-information[3]	3	3	6	2	2	0		0		1	1	1	2	1	1	2	1	1	1	0	1	1	1	0	1	3		2	2	2		2	2		2	2
May 16, 2021 6:57:17 PM	uuid:9859ff6e-8178-44f9-a2f9-94682f30c104	2	12	1	Miembe Saba	May 6, 2021	1013	1	39	1013	1	uuid:9859ff6e-8178-44f9-a2f9-94682f30c104/household-information[1]	5	1	1	39	1	2		3		1	1	1	2	1	1	2	1	2	2	0	1	2	2	0	1	3		2	4	2		2	2		2	2
May 16, 2021 6:57:17 PM	uuid:9859ff6e-8178-44f9-a2f9-94682f30c104	2	12	1	Miembe Saba	May 6, 2021	1013	1	39	1013	1	uuid:9859ff6e-8178-44f9-a2f9-94682f30c104/household-information[2]	5	2	2	33	2	2		3		1	1	1	2	1	1	2	1	2	2	0	1	2	2	0	1	3		2	4	2		2	2		2	2
May 16, 2021 6:57:17 PM	uuid:9859ff6e-8178-44f9-a2f9-94682f30c104	2	12	1	Miembe Saba	May 6, 2021	1013	1	39	1013	1	uuid:9859ff6e-8178-44f9-a2f9-94682f30c104/household-information[5]	5	5	3	3	1	1		0		1	1	1	2	1	1	2	1	2	2	0	1	2	2	0	1	3		2	4	2		2	2		2	2
May 16, 2021 6:57:17 PM	uuid:9859ff6e-8178-44f9-a2f9-94682f30c104	2	12	1	Miembe Saba	May 6, 2021	1013	1	39	1013	1	uuid:9859ff6e-8178-44f9-a2f9-94682f30c104/household-information[4]	5	4	3	11	2	2		0		1	1	1	2	1	1	2	1	2	2	0	1	2	2	0	1	3		2	4	2		2	2		2	2
May 16, 2021 6:57:18 PM	uuid:e7a0386d-aaa0-45f9-b6ea-64dfd381091b	7	12	1	Miembe Saba	May 6, 2021	1014	1	32	1014	2	uuid:e7a0386d-aaa0-45f9-b6ea-64dfd381091b/household-information[5]	5	5	3	2	1	0		0		1	1	1	2	1	1	2	1	2	2	0	1	2	2	0	1	3		4	4	2		2	2		2	2
May 16, 2021 6:57:18 PM	uuid:e7a0386d-aaa0-45f9-b6ea-64dfd381091b	7	12	1	Miembe Saba	May 6, 2021	1014	1	32	1014	2	uuid:e7a0386d-aaa0-45f9-b6ea-64dfd381091b/household-information[3]	5	3	3	14	2	2		0		1	1	1	2	1	1	2	1	2	2	0	1	2	2	0	1	3		4	4	2		2	2		2	2
May 16, 2021 6:57:18 PM	uuid:e7a0386d-aaa0-45f9-b6ea-64dfd381091b	7	12	1	Miembe Saba	May 6, 2021	1014	1	32	1014	2	uuid:e7a0386d-aaa0-45f9-b6ea-64dfd381091b/household-information[2]	5	2	1	33	1	2		3		1	1	1	2	1	1	2	1	2	2	0	1	2	2	0	1	3		4	4	2		2	2		2	2
May 16, 2021 6:57:18 PM	uuid:e7a0386d-aaa0-45f9-b6ea-64dfd381091b	7	12	1	Miembe Saba	May 6, 2021	1014	1	32	1014	2	uuid:e7a0386d-aaa0-45f9-b6ea-64dfd381091b/household-information[4]	5	4	3	11	2	2		0		1	1	1	2	1	1	2	1	2	2	0	1	2	2	0	1	3		4	4	2		2	2		2	2
May 16, 2021 6:57:20 PM	uuid:16377df0-c780-4e73-8b6f-24270fa4740c	2	12	1	Miembe Saba	May 6, 2021	1015	1	67	1015	2	uuid:16377df0-c780-4e73-8b6f-24270fa4740c/household-information[2]	2	2	1	80	1	2		3		1	1	1	2	1	1	2	0	0	2	0	0	0	2	0	1	3		4	2	1		2	1		2	2
May 16, 2021 6:57:22 PM	uuid:eecd5d51-dbb8-4989-adf6-81f3894c078a	2	12	1	Miembe Saba	May 7, 2021	1016	1	46	1016	1	uuid:eecd5d51-dbb8-4989-adf6-81f3894c078a/household-information[2]	5	2	2	32	2	1		3		1	1	1	2	1	1	2	1	2	2	0	1	2	2	0	1	3		4	4	2		1	2		2	2
May 16, 2021 6:57:22 PM	uuid:eecd5d51-dbb8-4989-adf6-81f3894c078a	2	12	1	Miembe Saba	May 7, 2021	1016	1	46	1016	1	uuid:eecd5d51-dbb8-4989-adf6-81f3894c078a/household-information[5]	5	5	3	2	1	0		0		1	1	1	2	1	1	2	1	2	2	0	1	2	2	0	1	3		4	4	2		1	2		2	2
May 16, 2021 6:57:22 PM	uuid:eecd5d51-dbb8-4989-adf6-81f3894c078a	2	12	1	Miembe Saba	May 7, 2021	1016	1	46	1016	1	uuid:eecd5d51-dbb8-4989-adf6-81f3894c078a/household-information[3]	5	3	3	12	1	2		0		1	1	1	2	1	1	2	1	2	2	0	1	2	2	0	1	3		4	4	2		1	2		2	2
May 16, 2021 6:57:22 PM	uuid:eecd5d51-dbb8-4989-adf6-81f3894c078a	2	12	1	Miembe Saba	May 7, 2021	1016	1	46	1016	1	uuid:eecd5d51-dbb8-4989-adf6-81f3894c078a/household-information[4]	5	4	3	9	1	2		0		1	1	1	2	1	1	2	1	2	2	0	1	2	2	0	1	3		4	4	2		1	2		2	2
May 16, 2021 6:57:23 PM	uuid:acc3ab92-6ab1-425e-a807-5ed0fef7cb42	7	12	1	Miembe Saba	May 7, 2021	1017	1	55	1017	1	uuid:acc3ab92-6ab1-425e-a807-5ed0fef7cb42/household-information[1]	3	1	1	55	1	2		5		1	1	1	2	1	1	2	0	0	3	0	0	0	3	0	1	3		3	3	5	Iron	2	2		1	6
May 16, 2021 6:57:23 PM	uuid:acc3ab92-6ab1-425e-a807-5ed0fef7cb42	7	12	1	Miembe Saba	May 7, 2021	1017	1	55	1017	1	uuid:acc3ab92-6ab1-425e-a807-5ed0fef7cb42/household-information[2]	3	2	3	28	1	3		3		1	1	1	2	1	1	2	0	0	3	0	0	0	3	0	1	3		3	3	5	Iron	2	2		1	6
May 16, 2021 6:57:23 PM	uuid:acc3ab92-6ab1-425e-a807-5ed0fef7cb42	7	12	1	Miembe Saba	May 7, 2021	1017	1	55	1017	1	uuid:acc3ab92-6ab1-425e-a807-5ed0fef7cb42/household-information[3]	3	3	2	50	2	3		2		1	1	1	2	1	1	2	0	0	3	0	0	0	3	0	1	3		3	3	5	Iron	2	2		1	6
May 16, 2021 7:00:56 PM	uuid:6dd1f43d-cda1-4ba9-98bb-53ecea5214fc	1	11	1	Mswelezi	May 10, 2021	1019	1	30	1019	2	uuid:6dd1f43d-cda1-4ba9-98bb-53ecea5214fc/household-information[3]	4	3	3	13	1	2		0		1	1	1	2	1	1	2	1	1	2	0	1	1	2	0	1	1		4	2	2		1	3		2	2
May 16, 2021 7:00:56 PM	uuid:6dd1f43d-cda1-4ba9-98bb-53ecea5214fc	1	11	1	Mswelezi	May 10, 2021	1019	1	30	1019	2	uuid:6dd1f43d-cda1-4ba9-98bb-53ecea5214fc/household-information[2]	4	2	2	30	2	2		3		1	1	1	2	1	1	2	1	1	2	0	1	1	2	0	1	1		4	2	2		1	3		2	2
May 16, 2021 7:00:56 PM	uuid:6dd1f43d-cda1-4ba9-98bb-53ecea5214fc	1	11	1	Mswelezi	May 10, 2021	1019	1	30	1019	2	uuid:6dd1f43d-cda1-4ba9-98bb-53ecea5214fc/household-information[1]	4	1	1	33	1	2		3		1	1	1	2	1	1	2	1	1	2	0	1	1	2	0	1	1		4	2	2		1	3		2	2
May 16, 2021 7:00:58 PM	uuid:c30a7ea5-10fe-4e31-950e-d0c9d38f8761	5	11	1	Mswelezi	May 10, 2021	1020	1	55	1020	1	uuid:c30a7ea5-10fe-4e31-950e-d0c9d38f8761/household-information[7]	7	7	3	26	2	2		3		1	1	1	2	1	1	2	0	2	5	0	0	2	5	0	1	3		4	2	3		1	2		2	2
May 16, 2021 7:00:58 PM	uuid:c30a7ea5-10fe-4e31-950e-d0c9d38f8761	5	11	1	Mswelezi	May 10, 2021	1020	1	55	1020	1	uuid:c30a7ea5-10fe-4e31-950e-d0c9d38f8761/household-information[4]	7	4	3	6	2	0		0		1	1	1	2	1	1	2	0	2	5	0	0	2	5	0	1	3		4	2	3		1	2		2	2
May 16, 2021 7:00:58 PM	uuid:c30a7ea5-10fe-4e31-950e-d0c9d38f8761	5	11	1	Mswelezi	May 10, 2021	1020	1	55	1020	1	uuid:c30a7ea5-10fe-4e31-950e-d0c9d38f8761/household-information[3]	7	3	3	15	2	2		3		1	1	1	2	1	1	2	0	2	5	0	0	2	5	0	1	3		4	2	3		1	2		2	2
May 16, 2021 7:00:58 PM	uuid:c30a7ea5-10fe-4e31-950e-d0c9d38f8761	5	11	1	Mswelezi	May 10, 2021	1020	1	55	1020	1	uuid:c30a7ea5-10fe-4e31-950e-d0c9d38f8761/household-information[5]	7	5	3	20	2	2		3		1	1	1	2	1	1	2	0	2	5	0	0	2	5	0	1	3		4	2	3		1	2		2	2
May 16, 2021 7:00:58 PM	uuid:c30a7ea5-10fe-4e31-950e-d0c9d38f8761	5	11	1	Mswelezi	May 10, 2021	1020	1	55	1020	1	uuid:c30a7ea5-10fe-4e31-950e-d0c9d38f8761/household-information[2]	7	2	2	45	2	2		3		1	1	1	2	1	1	2	0	2	5	0	0	2	5	0	1	3		4	2	3		1	2		2	2
May 16, 2021 7:00:58 PM	uuid:c30a7ea5-10fe-4e31-950e-d0c9d38f8761	5	11	1	Mswelezi	May 10, 2021	1020	1	55	1020	1	uuid:c30a7ea5-10fe-4e31-950e-d0c9d38f8761/household-information[1]	7	1	1	55	1	2		3		1	1	1	2	1	1	2	0	2	5	0	0	2	5	0	1	3		4	2	3		1	2		2	2
May 16, 2021 7:00:58 PM	uuid:c30a7ea5-10fe-4e31-950e-d0c9d38f8761	5	11	1	Mswelezi	May 10, 2021	1020	1	55	1020	1	uuid:c30a7ea5-10fe-4e31-950e-d0c9d38f8761/household-information[6]	7	6	3	35	2	2		3		1	1	1	2	1	1	2	0	2	5	0	0	2	5	0	1	3		4	2	3		1	2		2	2
May 16, 2021 7:05:30 PM	uuid:bcfd662d-4505-4e15-8259-5d22872afd35	10	13	1	Miembe Saba	May 7, 2021	1021	1	47	1021	1	uuid:bcfd662d-4505-4e15-8259-5d22872afd35/household-information[7]	8	7	12	21	2	4		3		1	1	1	3	2	1	2	0	2	4	0	0	2	4	0	2	3		6	1	2		1	5	Processed wood	2	2
May 16, 2021 7:05:30 PM	uuid:bcfd662d-4505-4e15-8259-5d22872afd35	10	13	1	Miembe Saba	May 7, 2021	1021	1	47	1021	1	uuid:bcfd662d-4505-4e15-8259-5d22872afd35/household-information[1]	8	1	1	47	1	3		3		1	1	1	3	2	1	2	0	2	4	0	0	2	4	0	2	3		6	1	2		1	5	Processed wood	2	2
May 16, 2021 7:05:30 PM	uuid:bcfd662d-4505-4e15-8259-5d22872afd35	10	13	1	Miembe Saba	May 7, 2021	1021	1	47	1021	1	uuid:bcfd662d-4505-4e15-8259-5d22872afd35/household-information[6]	8	6	3	7	2	2		6	student	1	1	1	3	2	2	2	0	2	4	0	0	2	4	0	2	3		6	1	2		1	5	Processed wood	2	2
May 16, 2021 7:05:30 PM	uuid:bcfd662d-4505-4e15-8259-5d22872afd35	10	13	1	Miembe Saba	May 7, 2021	1021	1	47	1021	1	uuid:bcfd662d-4505-4e15-8259-5d22872afd35/household-information[5]	8	5	3	12	1	2		6	student	1	1	1	3	2	1	2	0	2	4	0	0	2	4	0	1	3		6	3	5	steel bar	2	5	Processed wood	2	2
May 16, 2021 7:05:30 PM	uuid:bcfd662d-4505-4e15-8259-5d22872afd35	10	13	1	Miembe Saba	May 7, 2021	1021	1	47	1021	1	uuid:bcfd662d-4505-4e15-8259-5d22872afd35/household-information[8]	8	8	12	25	2	4		3		1	1	1	3	2	1	2	0	2	4	0	0	2	4	0	2	3		6	1	2		1	5	Processed wood	2	2
May 16, 2021 7:05:30 PM	uuid:bcfd662d-4505-4e15-8259-5d22872afd35	10	13	1	Miembe Saba	May 7, 2021	1021	1	47	1021	1	uuid:bcfd662d-4505-4e15-8259-5d22872afd35/household-information[2]	8	2	2	36	2	0		3		1	1	1	3	2	1	2	0	2	4	0	0	2	4	0	2	3		6	1	2		1	5	Processed wood	2	2
May 16, 2021 7:05:30 PM	uuid:bcfd662d-4505-4e15-8259-5d22872afd35	10	13	1	Miembe Saba	May 7, 2021	1021	1	47	1021	1	uuid:bcfd662d-4505-4e15-8259-5d22872afd35/household-information[4]	8	4	3	16	2	3		6	student	2		1	3	2	1	2	0	2	4	0	0	2	4	0	2	3		6	1	2		1	5	Processed wood	2	2
May 16, 2021 7:05:30 PM	uuid:bcfd662d-4505-4e15-8259-5d22872afd35	10	13	1	Miembe Saba	May 7, 2021	1021	1	47	1021	1	uuid:bcfd662d-4505-4e15-8259-5d22872afd35/household-information[3]	8	3	3	20	2	3		6	student	2		1	3	2	1	2	0	2	4	0	0	2	4	0	2	3		6	1	2		1	5	Processed wood	2	2
May 16, 2021 7:05:32 PM	uuid:94a83a28-76d6-45b0-91d9-e997bdd539ea	9	13	1	Miembe Saba	May 7, 2021	1022	1	20	1022	2	uuid:94a83a28-76d6-45b0-91d9-e997bdd539ea/household-information[4]	4	4	3	1	1	0		0		1	1	1	2	1	1	2	2	0	2	0	2	0	2	0	1	3		7	1	2		3	5	Processed wood	2	2
May 16, 2021 7:05:32 PM	uuid:94a83a28-76d6-45b0-91d9-e997bdd539ea	9	13	1	Miembe Saba	May 7, 2021	1022	1	20	1022	2	uuid:94a83a28-76d6-45b0-91d9-e997bdd539ea/household-information[3]	4	3	3	3	2	0		0		1	1	1	2	1	1	2	2	0	2	0	2	0	2	0	1	3		7	1	2		3	5	Processed wood	2	2
May 16, 2021 7:05:32 PM	uuid:94a83a28-76d6-45b0-91d9-e997bdd539ea	9	13	1	Miembe Saba	May 7, 2021	1022	1	20	1022	2	uuid:94a83a28-76d6-45b0-91d9-e997bdd539ea/household-information[2]	4	2	2	20	2	2		3		1	1	1	2	1	1	2	2	0	2	0	2	0	2	0	1	3		7	1	2		3	5	Processed wood	2	2
May 16, 2021 7:05:33 PM	uuid:75b87970-3d08-4652-bbb3-b4bb8b00fad3	10	13	1	Miembe Saba	May 7, 2021	1023	1	30	1023	2	uuid:75b87970-3d08-4652-bbb3-b4bb8b00fad3/household-information[1]	5	1	1	44	1	2		3		1	1	1	2	1	1	2	0	2	3	0	0	2	3	0	1	3		7	4	1		2	5	Processed wood	2	2
May 16, 2021 7:05:33 PM	uuid:75b87970-3d08-4652-bbb3-b4bb8b00fad3	10	13	1	Miembe Saba	May 7, 2021	1023	1	30	1023	2	uuid:75b87970-3d08-4652-bbb3-b4bb8b00fad3/household-information[2]	5	2	2	30	2	2		3		1	1	1	2	1	1	2	0	2	3	0	0	2	3	0	1	3		7	4	1		2	5	Processed wood	2	2
May 16, 2021 7:05:33 PM	uuid:75b87970-3d08-4652-bbb3-b4bb8b00fad3	10	13	1	Miembe Saba	May 7, 2021	1023	1	30	1023	2	uuid:75b87970-3d08-4652-bbb3-b4bb8b00fad3/household-information[4]	5	4	3	13	1	2		6	student	1	1	1	2	1	1	2	0	2	3	0	0	2	3	0	1	3		7	4	1		2	5	Processed wood	2	2
May 16, 2021 7:05:33 PM	uuid:75b87970-3d08-4652-bbb3-b4bb8b00fad3	10	13	1	Miembe Saba	May 7, 2021	1023	1	30	1023	2	uuid:75b87970-3d08-4652-bbb3-b4bb8b00fad3/household-information[5]	5	5	3	13	1	2		6	student	1	1	1	2	1	1	2	0	2	3	0	0	2	3	0	1	3		7	4	1		2	5	Processed wood	2	2
May 16, 2021 7:05:33 PM	uuid:75b87970-3d08-4652-bbb3-b4bb8b00fad3	10	13	1	Miembe Saba	May 7, 2021	1023	1	30	1023	2	uuid:75b87970-3d08-4652-bbb3-b4bb8b00fad3/household-information[3]	5	3	3	18	2	2		3		1	1	1	2	1	1	2	0	2	3	0	0	2	3	0	1	3		7	4	1		2	5	Processed wood	2	2
May 16, 2021 7:05:35 PM	uuid:dd9a2beb-f7b2-44e1-8565-5446ac14cdb0	9	13	1	Miembe Saba	May 7, 2021	1024	1	40	1024	1	uuid:dd9a2beb-f7b2-44e1-8565-5446ac14cdb0/household-information[1]	3	1	1	40	2	2		3		1	2	2	2	2	2	2	0	2	1	0	0	0	0	0	1	3		4	2	5	steel bar	2	5	Processed wood	2	2
May 16, 2021 7:05:35 PM	uuid:dd9a2beb-f7b2-44e1-8565-5446ac14cdb0	9	13	1	Miembe Saba	May 7, 2021	1024	1	40	1024	1	uuid:dd9a2beb-f7b2-44e1-8565-5446ac14cdb0/household-information[2]	3	2	3	15	1	2		0		1	2	2	2	2	2	2	0	2	1	0	0	0	0	0	1	3		4	2	5	steel bar	2	5	Processed wood	2	2
May 16, 2021 7:05:37 PM	uuid:b397415f-3a42-46c0-ac54-64c3823312f6	9	13	1	Miembe Saba	May 7, 2021	1026	1	41	1026	1	uuid:b397415f-3a42-46c0-ac54-64c3823312f6/household-information[4]	5	4	3	15	1	3		6	student	2		1	2	1	1	2	0	1	2	0	0	1	2	0	1	3		6	4	5	Processed wood	2	5	Processed wood	2	2
May 16, 2021 7:05:37 PM	uuid:b397415f-3a42-46c0-ac54-64c3823312f6	9	13	1	Miembe Saba	May 7, 2021	1026	1	41	1026	1	uuid:b397415f-3a42-46c0-ac54-64c3823312f6/household-information[3]	5	3	3	19	2	2		2		2		1	2	1	1	2	0	1	2	0	0	1	2	0	1	3		6	4	5	Processed wood	2	5	Processed wood	2	2
May 16, 2021 7:05:37 PM	uuid:b397415f-3a42-46c0-ac54-64c3823312f6	9	13	1	Miembe Saba	May 7, 2021	1026	1	41	1026	1	uuid:b397415f-3a42-46c0-ac54-64c3823312f6/household-information[2]	5	2	2	35	2	2		3		1	1	1	2	1	1	2	0	1	2	0	0	1	2	0	1	3		6	4	5	Processed wood	2	5	Processed wood	2	2
May 16, 2021 7:05:37 PM	uuid:b397415f-3a42-46c0-ac54-64c3823312f6	9	13	1	Miembe Saba	May 7, 2021	1026	1	41	1026	1	uuid:b397415f-3a42-46c0-ac54-64c3823312f6/household-information[5]	5	5	3	8	2	2		6	student	1	1	1	2	1	1	2	0	1	2	0	0	1	2	0	1	3		6	4	5	Processed wood	2	5	Processed wood	2	2
May 16, 2021 7:05:39 PM	uuid:a79625ad-747a-4861-947b-fd547a60737a	10	13	1	Miembe Saba	May 7, 2021	1027	1	71	1027	1	uuid:a79625ad-747a-4861-947b-fd547a60737a/household-information[7]	7	7	6	4	2	0		0		1	1	2	0	1	1	2	1	3	3	0	1	3	3	0	1	3		3	5	5	Processed wood	2	5	Processed wood	2	2
May 16, 2021 7:05:39 PM	uuid:a79625ad-747a-4861-947b-fd547a60737a	10	13	1	Miembe Saba	May 7, 2021	1027	1	71	1027	1	uuid:a79625ad-747a-4861-947b-fd547a60737a/household-information[1]	7	1	1	71	2	0		3		1	1	2	0	1	1	2	1	3	3	0	1	3	3	0	1	3		3	5	5	Processed wood	2	5	Processed wood	2	2
May 16, 2021 7:05:39 PM	uuid:a79625ad-747a-4861-947b-fd547a60737a	10	13	1	Miembe Saba	May 7, 2021	1027	1	71	1027	1	uuid:a79625ad-747a-4861-947b-fd547a60737a/household-information[2]	7	2	3	56	1	2		3		1	1	2	0	1	1	2	1	3	3	0	1	3	3	0	1	3		3	5	5	Processed wood	2	5	Processed wood	2	2
May 16, 2021 7:05:39 PM	uuid:a79625ad-747a-4861-947b-fd547a60737a	10	13	1	Miembe Saba	May 7, 2021	1027	1	71	1027	1	uuid:a79625ad-747a-4861-947b-fd547a60737a/household-information[3]	7	3	3	49	2	2		3		1	1	2	0	1	1	2	1	3	3	0	1	3	3	0	1	3		3	5	5	Processed wood	2	5	Processed wood	2	2
May 16, 2021 7:05:39 PM	uuid:a79625ad-747a-4861-947b-fd547a60737a	10	13	1	Miembe Saba	May 7, 2021	1027	1	71	1027	1	uuid:a79625ad-747a-4861-947b-fd547a60737a/household-information[5]	7	5	6	11	2	2		6	student	1	1	2	0	1	1	2	1	3	3	0	1	3	3	0	1	3		3	5	5	Processed wood	2	5	Processed wood	2	2
May 16, 2021 7:05:39 PM	uuid:a79625ad-747a-4861-947b-fd547a60737a	10	13	1	Miembe Saba	May 7, 2021	1027	1	71	1027	1	uuid:a79625ad-747a-4861-947b-fd547a60737a/household-information[4]	7	4	6	16	2	2		6	student	1	1	2	0	1	1	2	1	3	3	0	1	3	3	0	1	3		3	5	5	Processed wood	2	5	Processed wood	2	2
May 16, 2021 7:05:40 PM	uuid:75d7ae37-aa87-4980-9783-d600a9c5f69a	9	13	1	Miembe Saba	May 7, 2021	1028	1	28	1028	2	uuid:75d7ae37-aa87-4980-9783-d600a9c5f69a/household-information[1]	5	1	1	42	1	2		2		1	1	1	2	1	1	2	2	1	2	0	2	1	2	0	1	3		6	2	5	steel bar	2	5	Processed wood	2	2
May 16, 2021 7:05:40 PM	uuid:75d7ae37-aa87-4980-9783-d600a9c5f69a	9	13	1	Miembe Saba	May 7, 2021	1028	1	28	1028	2	uuid:75d7ae37-aa87-4980-9783-d600a9c5f69a/household-information[4]	5	4	3	4	2	0		0		1	1	1	2	1	1	2	2	1	2	0	2	1	2	0	1	3		6	2	5	steel bar	2	5	Processed wood	2	2
May 16, 2021 7:05:40 PM	uuid:75d7ae37-aa87-4980-9783-d600a9c5f69a	9	13	1	Miembe Saba	May 7, 2021	1028	1	28	1028	2	uuid:75d7ae37-aa87-4980-9783-d600a9c5f69a/household-information[2]	5	2	2	28	2	2		2		1	1	1	2	1	1	2	2	1	2	0	2	1	2	0	1	3		6	2	5	steel bar	2	5	Processed wood	2	2
May 16, 2021 7:05:40 PM	uuid:75d7ae37-aa87-4980-9783-d600a9c5f69a	9	13	1	Miembe Saba	May 7, 2021	1028	1	28	1028	2	uuid:75d7ae37-aa87-4980-9783-d600a9c5f69a/household-information[3]	5	3	3	11	1	2		6	student	1	1	1	2	1	1	2	2	1	2	0	2	1	2	0	1	3		6	2	5	steel bar	2	5	Processed wood	2	2
May 16, 2021 7:00:59 PM	uuid:2a47fbc0-e057-4143-a314-9b317f308496	5	11	1	Mswelezi	May 10, 2021	1029	1	20	1029	3	uuid:2a47fbc0-e057-4143-a314-9b317f308496/household-information[1]	3	1	1	50	1	2		3		1	2	1	2	1	1	2	0	1	2	0	0	0	0	0	1	3		4	2	3		1	2		2	2
May 16, 2021 7:00:59 PM	uuid:2a47fbc0-e057-4143-a314-9b317f308496	5	11	1	Mswelezi	May 10, 2021	1029	1	20	1029	3	uuid:2a47fbc0-e057-4143-a314-9b317f308496/household-information[3]	3	3	3	16	1	2		3		1	2	1	2	1	1	2	0	1	2	0	0	0	0	0	1	3		4	2	3		1	2		2	2
May 16, 2021 7:01:00 PM	uuid:14b05974-c13c-4043-8827-3b35924a5643	5	11	1	Mikuyuni	May 10, 2021	1030	1	28	1030	3	uuid:14b05974-c13c-4043-8827-3b35924a5643/household-information[5]	7	5	6	11	2	2		0		1	2	2	0	1	1	2	2	1	1	0	0	0	0	0	1	3		4	4	3		2	2		2	2
May 16, 2021 7:01:00 PM	uuid:14b05974-c13c-4043-8827-3b35924a5643	5	11	1	Mikuyuni	May 10, 2021	1030	1	28	1030	3	uuid:14b05974-c13c-4043-8827-3b35924a5643/household-information[3]	7	3	3	40	1	2		3		2		2	0	1	1	2	2	1	1	0	0	0	0	0	1	3		4	4	3		2	2		2	2
May 16, 2021 7:01:00 PM	uuid:14b05974-c13c-4043-8827-3b35924a5643	5	11	1	Mikuyuni	May 10, 2021	1030	1	28	1030	3	uuid:14b05974-c13c-4043-8827-3b35924a5643/household-information[7]	7	7	6	1	2	0		0		1	2	2	0	1	1	2	2	1	1	0	0	0	0	0	1	3		4	4	3		2	2		2	2
May 16, 2021 7:01:00 PM	uuid:14b05974-c13c-4043-8827-3b35924a5643	5	11	1	Mikuyuni	May 10, 2021	1030	1	28	1030	3	uuid:14b05974-c13c-4043-8827-3b35924a5643/household-information[6]	7	6	6	4	1	0		0		1	2	2	0	1	1	2	2	1	1	0	0	0	0	0	1	3		4	4	3		2	2		2	2
May 16, 2021 7:01:00 PM	uuid:14b05974-c13c-4043-8827-3b35924a5643	5	11	1	Mikuyuni	May 10, 2021	1030	1	28	1030	3	uuid:14b05974-c13c-4043-8827-3b35924a5643/household-information[1]	7	1	1	80	1	0		3		2		2	0	1	1	2	2	1	1	0	0	0	0	0	1	3		4	4	3		2	2		2	2
May 16, 2021 7:01:00 PM	uuid:14b05974-c13c-4043-8827-3b35924a5643	5	11	1	Mikuyuni	May 10, 2021	1030	1	28	1030	3	uuid:14b05974-c13c-4043-8827-3b35924a5643/household-information[2]	7	2	2	70	2	0		3		2		2	0	1	1	2	2	1	1	0	0	0	0	0	1	3		4	4	3		2	2		2	2
May 16, 2021 7:01:00 PM	uuid:14b05974-c13c-4043-8827-3b35924a5643	5	11	1	Mikuyuni	May 10, 2021	1030	1	28	1030	3	uuid:14b05974-c13c-4043-8827-3b35924a5643/household-information[4]	7	4	3	28	2	2		3		1	2	2	0	1	1	2	2	1	1	0	0	0	0	0	1	3		4	4	3		2	2		2	2
May 16, 2021 7:16:52 PM	uuid:5d2cd5a8-1e56-40bf-9394-5f78e2fe4bbf	11	14	1	Miembe Saba	May 7, 2021	1031	1	29	1031	1	uuid:5d2cd5a8-1e56-40bf-9394-5f78e2fe4bbf/household-information[1]	5	1	1	29	2	3		3		1	1	1	3	1	1	1	1	0	3	0	1	0	3	0	1	3		4	5	2		2	2		2	2
May 16, 2021 7:16:52 PM	uuid:5d2cd5a8-1e56-40bf-9394-5f78e2fe4bbf	11	14	1	Miembe Saba	May 7, 2021	1031	1	29	1031	1	uuid:5d2cd5a8-1e56-40bf-9394-5f78e2fe4bbf/household-information[5]	5	5	9	25	1	3		3		1	1	1	3	1	1	1	1	0	3	0	1	0	3	0	1	3		4	5	2		2	2		2	2
May 16, 2021 7:16:52 PM	uuid:5d2cd5a8-1e56-40bf-9394-5f78e2fe4bbf	11	14	1	Miembe Saba	May 7, 2021	1031	1	29	1031	1	uuid:5d2cd5a8-1e56-40bf-9394-5f78e2fe4bbf/household-information[4]	5	4	3	4	2	0		0		1	1	1	3	1	1	1	1	0	3	0	1	0	3	0	1	3		4	5	2		2	2		2	2
May 16, 2021 7:16:52 PM	uuid:5d2cd5a8-1e56-40bf-9394-5f78e2fe4bbf	11	14	1	Miembe Saba	May 7, 2021	1031	1	29	1031	1	uuid:5d2cd5a8-1e56-40bf-9394-5f78e2fe4bbf/household-information[3]	5	3	3	9	1	2		0		2		1	3	1	1	1	1	0	3	0	1	0	3	0	1	3		4	5	2		2	2		2	2
May 16, 2021 7:16:52 PM	uuid:5d2cd5a8-1e56-40bf-9394-5f78e2fe4bbf	11	14	1	Miembe Saba	May 7, 2021	1031	1	29	1031	1	uuid:5d2cd5a8-1e56-40bf-9394-5f78e2fe4bbf/household-information[2]	5	2	2	37	1	2		3		1	1	1	3	1	1	1	1	0	3	0	1	0	3	0	1	3		4	5	2		2	2		2	2
May 16, 2021 7:17:01 PM	uuid:54242d3f-d5c5-4a55-ba86-2fbb882e96e8	4	14	1	Miembe Saba	May 7, 2021	1034	1	21	1034	3	uuid:54242d3f-d5c5-4a55-ba86-2fbb882e96e8/household-information[7]	8	7	3	12	2	2		0		2		1	2	2	1	2	0	1	1	0	0	0	0	0	2	3		3	2	1		2	1		2	2
May 16, 2021 7:17:01 PM	uuid:54242d3f-d5c5-4a55-ba86-2fbb882e96e8	4	14	1	Miembe Saba	May 7, 2021	1034	1	21	1034	3	uuid:54242d3f-d5c5-4a55-ba86-2fbb882e96e8/household-information[3]	8	3	3	21	1	2		3		1	2	1	2	2	1	2	0	1	1	0	0	0	0	0	2	3		3	2	1		2	1		2	2
May 16, 2021 7:17:01 PM	uuid:54242d3f-d5c5-4a55-ba86-2fbb882e96e8	4	14	1	Miembe Saba	May 7, 2021	1034	1	21	1034	3	uuid:54242d3f-d5c5-4a55-ba86-2fbb882e96e8/household-information[5]	8	5	3	14	1	3		0		2		1	2	2	1	2	0	1	1	0	0	0	0	0	1	3		1	3	1		2	1		2	2
May 16, 2021 7:17:01 PM	uuid:54242d3f-d5c5-4a55-ba86-2fbb882e96e8	4	14	1	Miembe Saba	May 7, 2021	1034	1	21	1034	3	uuid:54242d3f-d5c5-4a55-ba86-2fbb882e96e8/household-information[6]	8	6	3	2	1	0		0		2		1	2	2	1	2	0	1	1	0	0	0	0	0	2	3		3	2	1		2	1		2	2
May 16, 2021 7:17:01 PM	uuid:54242d3f-d5c5-4a55-ba86-2fbb882e96e8	4	14	1	Miembe Saba	May 7, 2021	1034	1	21	1034	3	uuid:54242d3f-d5c5-4a55-ba86-2fbb882e96e8/household-information[2]	8	2	2	41	2	2		3		2		1	2	2	2	2	0	1	1	0	0	0	0	0	2	3		3	2	1		2	1		2	2
May 16, 2021 7:17:01 PM	uuid:54242d3f-d5c5-4a55-ba86-2fbb882e96e8	4	14	1	Miembe Saba	May 7, 2021	1034	1	21	1034	3	uuid:54242d3f-d5c5-4a55-ba86-2fbb882e96e8/household-information[4]	8	4	3	8	1	2		0		1	2	1	2	2	1	2	0	1	1	0	0	0	0	0	2	3		3	2	1		2	1		2	2
May 16, 2021 7:17:01 PM	uuid:54242d3f-d5c5-4a55-ba86-2fbb882e96e8	4	14	1	Miembe Saba	May 7, 2021	1034	1	21	1034	3	uuid:54242d3f-d5c5-4a55-ba86-2fbb882e96e8/household-information[1]	8	1	1	44	1	2		1		2		1	2	2	1	2	0	1	1	0	0	0	0	0	2	3		3	2	1		2	1		2	2
May 16, 2021 7:17:04 PM	uuid:f8495e5c-f755-4ac6-bd23-c7054dffe305	11	14	1	Miembe Saba	May 7, 2021	1035	1	82	1035	1	uuid:f8495e5c-f755-4ac6-bd23-c7054dffe305/household-information[2]	2	2	2	73	2	0		3		1	1	1	2	1	1	2	0	0	2	0	0	0	2	0	1	3		6	3	1		2	1		2	2
May 16, 2021 7:17:04 PM	uuid:f8495e5c-f755-4ac6-bd23-c7054dffe305	11	14	1	Miembe Saba	May 7, 2021	1035	1	82	1035	1	uuid:f8495e5c-f755-4ac6-bd23-c7054dffe305/household-information[1]	2	1	1	82	1	2		3		1	1	1	2	1	2	2	0	0	2	0	0	0	2	0	1	3		6	3	1		2	1		2	2
May 16, 2021 7:17:06 PM	uuid:9fc8ad45-d729-49e0-9dc5-1152b8749ce0	11	14	1	Miembe Saba	May 7, 2021	1036	1	27	1036	2	uuid:9fc8ad45-d729-49e0-9dc5-1152b8749ce0/household-information[5]	5	5	3	1	1	0		0		1	1	1	2	1	1	1	1	2	2	0	1	2	2	0	1	3		6	2	1		1	2		2	2
May 16, 2021 7:17:06 PM	uuid:9fc8ad45-d729-49e0-9dc5-1152b8749ce0	11	14	1	Miembe Saba	May 7, 2021	1036	1	27	1036	2	uuid:9fc8ad45-d729-49e0-9dc5-1152b8749ce0/household-information[1]	5	1	2	27	2	2		3		1	1	1	2	1	1	1	1	2	2	0	1	2	2	0	1	3		6	2	1		1	2		2	2
May 16, 2021 7:17:06 PM	uuid:9fc8ad45-d729-49e0-9dc5-1152b8749ce0	11	14	1	Miembe Saba	May 7, 2021	1036	1	27	1036	2	uuid:9fc8ad45-d729-49e0-9dc5-1152b8749ce0/household-information[2]	5	2	1	33	1	2		3		1	1	1	2	1	1	1	1	2	2	0	1	2	2	0	1	3		6	2	1		1	2		2	2
May 16, 2021 7:17:06 PM	uuid:9fc8ad45-d729-49e0-9dc5-1152b8749ce0	11	14	1	Miembe Saba	May 7, 2021	1036	1	27	1036	2	uuid:9fc8ad45-d729-49e0-9dc5-1152b8749ce0/household-information[3]	5	3	3	10	1	2		0		2		1	2	1	1	1	1	2	2	0	1	2	2	0	1	3		6	2	1		1	2		2	2
May 16, 2021 7:17:06 PM	uuid:9fc8ad45-d729-49e0-9dc5-1152b8749ce0	11	14	1	Miembe Saba	May 7, 2021	1036	1	27	1036	2	uuid:9fc8ad45-d729-49e0-9dc5-1152b8749ce0/household-information[4]	5	4	3	7	1	2		0		1	1	1	2	1	1	1	1	2	2	0	1	2	2	0	1	3		6	2	1		1	2		2	2
May 16, 2021 7:17:07 PM	uuid:7e566d24-9754-43e5-80b6-9f998adcb79f	4	14	1	Miembe Saba	May 7, 2021	1037	1	34	1037	1	uuid:7e566d24-9754-43e5-80b6-9f998adcb79f/household-information[4]	6	4	3	3	2	0		0		1	1	1	2	1	1	2	1	3	2	0	1	3	2	0	1	3		4	6	2		2	2		2	2
May 16, 2021 7:17:07 PM	uuid:7e566d24-9754-43e5-80b6-9f998adcb79f	4	14	1	Miembe Saba	May 7, 2021	1037	1	34	1037	1	uuid:7e566d24-9754-43e5-80b6-9f998adcb79f/household-information[6]	6	6	3	11	1	2		0		1	1	1	2	1	1	2	1	3	2	0	1	3	2	0	1	3		4	6	2		2	2		2	2
May 16, 2021 7:17:07 PM	uuid:7e566d24-9754-43e5-80b6-9f998adcb79f	4	14	1	Miembe Saba	May 7, 2021	1037	1	34	1037	1	uuid:7e566d24-9754-43e5-80b6-9f998adcb79f/household-information[3]	6	3	3	7	1	2		0		1	1	1	2	1	1	2	1	3	2	0	1	3	2	0	1	3		4	6	2		2	2		2	2
May 16, 2021 7:17:07 PM	uuid:7e566d24-9754-43e5-80b6-9f998adcb79f	4	14	1	Miembe Saba	May 7, 2021	1037	1	34	1037	1	uuid:7e566d24-9754-43e5-80b6-9f998adcb79f/household-information[2]	6	2	4	55	2	2		3		1	1	1	2	1	1	2	1	3	2	0	1	3	2	0	1	3		4	6	2		2	2		2	2
May 16, 2021 7:17:07 PM	uuid:7e566d24-9754-43e5-80b6-9f998adcb79f	4	14	1	Miembe Saba	May 7, 2021	1037	1	34	1037	1	uuid:7e566d24-9754-43e5-80b6-9f998adcb79f/household-information[5]	6	5	3	11	2	2		0		1	1	1	2	1	1	2	1	3	2	0	1	3	2	0	1	3		4	6	2		2	2		2	2
May 16, 2021 7:17:08 PM	uuid:9805a382-ab38-4b5e-88e0-c6ff74d3ed39	4	14	1	Miembe Saba	May 7, 2021	1038	1	25	1038	3	uuid:9805a382-ab38-4b5e-88e0-c6ff74d3ed39/household-information[1]	1	1	1	25	1	2		1		1	1	1	2	1	1	2	0	0	1	0	0	0	1	0	1	3		4	1	2		2	2		2	2
May 16, 2021 7:01:02 PM	uuid:93e0c19f-3a3e-40ed-827f-d462ac11a557	5	11	1	Mikuyuni	May 10, 2021	1039	1	29	1039	3	uuid:93e0c19f-3a3e-40ed-827f-d462ac11a557/household-information[4]	4	4	6	2	2	0		0		1	1	1	2	1	1	2	1	2	1	0	1	2	1	0	1	3		4	4	2		2	2		2	2
May 16, 2021 7:01:02 PM	uuid:93e0c19f-3a3e-40ed-827f-d462ac11a557	5	11	1	Mikuyuni	May 10, 2021	1039	1	29	1039	3	uuid:93e0c19f-3a3e-40ed-827f-d462ac11a557/household-information[1]	4	1	1	29	2	2		3		1	1	1	2	1	1	2	1	2	1	0	1	2	1	0	1	3		4	4	2		2	2		2	2
May 16, 2021 7:01:02 PM	uuid:93e0c19f-3a3e-40ed-827f-d462ac11a557	5	11	1	Mikuyuni	May 10, 2021	1039	1	29	1039	3	uuid:93e0c19f-3a3e-40ed-827f-d462ac11a557/household-information[3]	4	3	6	10	1	2		0		1	1	1	2	1	1	2	1	2	1	0	1	2	1	0	1	3		4	4	2		2	2		2	2
May 16, 2021 7:01:02 PM	uuid:93e0c19f-3a3e-40ed-827f-d462ac11a557	5	11	1	Mikuyuni	May 10, 2021	1039	1	29	1039	3	uuid:93e0c19f-3a3e-40ed-827f-d462ac11a557/household-information[2]	4	2	3	10	1	2		0		1	1	1	2	1	1	2	1	2	1	0	1	2	1	0	1	3		4	4	2		2	2		2	2
May 16, 2021 6:57:24 PM	uuid:076a4b39-68a6-4ed1-bb0d-f29769754c47	2	12	1	Mswelezi	May 10, 2021	1040	1	35	1040	2	uuid:076a4b39-68a6-4ed1-bb0d-f29769754c47/household-information[3]	3	3	3	18	2	2		3		1	1	1	2	1	1	2	1	0	2	0	1	0	2	0	1	3		4	2	2		2	2		2	2
May 16, 2021 6:57:24 PM	uuid:076a4b39-68a6-4ed1-bb0d-f29769754c47	2	12	1	Mswelezi	May 10, 2021	1040	1	35	1040	2	uuid:076a4b39-68a6-4ed1-bb0d-f29769754c47/household-information[2]	3	2	3	3	1	0		0		1	1	1	2	1	1	2	1	0	2	0	1	0	2	0	1	3		4	2	2		2	2		2	2
May 16, 2021 7:19:20 PM	uuid:8826ce84-5676-4dc3-a7cf-411e56387acc	12	15	1	Miembe Saba	May 16, 2021	1041	1	65	1041	2	uuid:8826ce84-5676-4dc3-a7cf-411e56387acc/household-information[5]	7	5	6	4	1	0		0		1	1	1	2	2	2	2	2	0	5	0	2	0	5	0	1	3		4	6	2		2	2		1	6
May 16, 2021 7:19:20 PM	uuid:8826ce84-5676-4dc3-a7cf-411e56387acc	12	15	1	Miembe Saba	May 16, 2021	1041	1	65	1041	2	uuid:8826ce84-5676-4dc3-a7cf-411e56387acc/household-information[3]	7	3	3	25	2	3		3		1	1	1	2	2	2	2	2	0	5	0	2	0	5	0	2	3		4	2	2		2	2		2	6
May 16, 2021 7:19:20 PM	uuid:8826ce84-5676-4dc3-a7cf-411e56387acc	12	15	1	Miembe Saba	May 16, 2021	1041	1	65	1041	2	uuid:8826ce84-5676-4dc3-a7cf-411e56387acc/household-information[7]	7	7	12	28	1	4		5		1	1	1	2	2	2	2	2	0	5	0	2	0	5	0	2	3		4	2	2		2	2		2	6
May 16, 2021 7:19:20 PM	uuid:8826ce84-5676-4dc3-a7cf-411e56387acc	12	15	1	Miembe Saba	May 16, 2021	1041	1	65	1041	2	uuid:8826ce84-5676-4dc3-a7cf-411e56387acc/household-information[1]	7	1	1	69	1	2		3		1	1	1	2	2	1	1	2	0	5	0	2	0	5	0	2	3		4	2	2		2	2		2	6
May 16, 2021 7:19:20 PM	uuid:8826ce84-5676-4dc3-a7cf-411e56387acc	12	15	1	Miembe Saba	May 16, 2021	1041	1	65	1041	2	uuid:8826ce84-5676-4dc3-a7cf-411e56387acc/household-information[2]	7	2	2	65	2	0		3		1	1	1	2	2	2	2	2	0	5	0	2	0	5	0	2	3		4	2	2		2	2		2	6
May 16, 2021 7:19:20 PM	uuid:8826ce84-5676-4dc3-a7cf-411e56387acc	12	15	1	Miembe Saba	May 16, 2021	1041	1	65	1041	2	uuid:8826ce84-5676-4dc3-a7cf-411e56387acc/household-information[6]	7	6	12	42	1	4		5		1	1	1	2	2	2	2	2	0	5	0	2	0	5	0	2	3		4	2	2		2	2		2	6
May 16, 2021 7:19:22 PM	uuid:61e291a2-69bf-4fc5-806b-61368b3c1169	12	15	1	Mikuyuni	May 16, 2021	1042	1	42	1042	2	uuid:61e291a2-69bf-4fc5-806b-61368b3c1169/household-information[5]	6	5	3	13	1	2		3		1	1	1	2	1	1	2	0	2	4	0	0	2	4	0	1	3		4	4	2		2	2		2	2
May 16, 2021 7:19:22 PM	uuid:61e291a2-69bf-4fc5-806b-61368b3c1169	12	15	1	Mikuyuni	May 16, 2021	1042	1	42	1042	2	uuid:61e291a2-69bf-4fc5-806b-61368b3c1169/household-information[3]	6	3	3	21	1	2		3		1	1	1	2	1	1	2	0	2	4	0	0	2	4	0	1	3		4	4	2		2	2		2	2
May 16, 2021 7:19:22 PM	uuid:61e291a2-69bf-4fc5-806b-61368b3c1169	12	15	1	Mikuyuni	May 16, 2021	1042	1	42	1042	2	uuid:61e291a2-69bf-4fc5-806b-61368b3c1169/household-information[4]	6	4	3	20	1	2		3		1	1	1	2	1	1	2	0	2	4	0	0	2	4	0	1	3		4	4	2		2	2		2	2
May 16, 2021 7:19:22 PM	uuid:61e291a2-69bf-4fc5-806b-61368b3c1169	12	15	1	Mikuyuni	May 16, 2021	1042	1	42	1042	2	uuid:61e291a2-69bf-4fc5-806b-61368b3c1169/household-information[6]	6	6	3	9	1	2		0		1	1	1	2	1	1	2	0	2	4	0	0	2	4	0	1	3		4	4	2		2	2		2	2
May 16, 2021 7:19:22 PM	uuid:61e291a2-69bf-4fc5-806b-61368b3c1169	12	15	1	Mikuyuni	May 16, 2021	1042	1	42	1042	2	uuid:61e291a2-69bf-4fc5-806b-61368b3c1169/household-information[2]	6	2	2	42	2	2		3		1	1	1	2	1	1	2	0	2	4	0	0	2	4	0	1	3		4	4	2		2	2		2	2
May 16, 2021 7:19:22 PM	uuid:61e291a2-69bf-4fc5-806b-61368b3c1169	12	15	1	Mikuyuni	May 16, 2021	1042	1	42	1042	2	uuid:61e291a2-69bf-4fc5-806b-61368b3c1169/household-information[1]	6	1	1	45	1	2		3		1	1	1	2	1	1	2	0	2	4	0	0	2	4	0	1	3		4	4	2		2	2		2	2
May 16, 2021 7:14:24 PM	uuid:3d2f231e-1484-4f5c-b375-3936e7e9c3fc	13	15	1	Miembe Saba	May 7, 2021	1045	1	59	1045	1	uuid:3d2f231e-1484-4f5c-b375-3936e7e9c3fc/household-information[3]	3	3	6	11	2	2		0		1	1	1	2	1	1	2	0	1	2	0	0	1	2	0	1	3		4	6	2		3	2		2	2
May 16, 2021 7:14:24 PM	uuid:3d2f231e-1484-4f5c-b375-3936e7e9c3fc	13	15	1	Miembe Saba	May 7, 2021	1045	1	59	1045	1	uuid:3d2f231e-1484-4f5c-b375-3936e7e9c3fc/household-information[2]	3	2	3	41	2	2		3		1	1	1	2	1	1	2	0	1	2	0	0	1	2	0	1	3		4	6	2		3	2		2	2
May 16, 2021 7:14:25 PM	uuid:db1ae648-0b01-4ddf-992d-bf1aace2f6a7	13	15	1	Miembe Saba	May 7, 2021	1046	1	35	1046	2	uuid:db1ae648-0b01-4ddf-992d-bf1aace2f6a7/household-information[4]	5	4	3	8	1	2		0		1	1	1	2	1	1	2	1	2	2	0	1	2	2	0	1	3		2	4	2		2	2		1	2
May 16, 2021 7:14:25 PM	uuid:db1ae648-0b01-4ddf-992d-bf1aace2f6a7	13	15	1	Miembe Saba	May 7, 2021	1046	1	35	1046	2	uuid:db1ae648-0b01-4ddf-992d-bf1aace2f6a7/household-information[5]	5	5	3	3	2	0		0		1	1	1	2	1	1	2	1	2	2	0	1	2	2	0	1	3		2	4	2		2	2		1	2
May 16, 2021 7:14:25 PM	uuid:db1ae648-0b01-4ddf-992d-bf1aace2f6a7	13	15	1	Miembe Saba	May 7, 2021	1046	1	35	1046	2	uuid:db1ae648-0b01-4ddf-992d-bf1aace2f6a7/household-information[3]	5	3	3	10	1	2		0		1	1	1	2	1	1	2	1	2	2	0	1	2	2	0	1	3		2	4	2		2	2		1	2
May 16, 2021 7:14:25 PM	uuid:db1ae648-0b01-4ddf-992d-bf1aace2f6a7	13	15	1	Miembe Saba	May 7, 2021	1046	1	35	1046	2	uuid:db1ae648-0b01-4ddf-992d-bf1aace2f6a7/household-information[1]	5	1	1	39	1	2		3		1	1	1	2	1	1	2	1	2	2	0	1	2	2	0	1	3		2	4	2		2	2		1	2
May 16, 2021 7:14:25 PM	uuid:db1ae648-0b01-4ddf-992d-bf1aace2f6a7	13	15	1	Miembe Saba	May 7, 2021	1046	1	35	1046	2	uuid:db1ae648-0b01-4ddf-992d-bf1aace2f6a7/household-information[2]	5	2	2	35	2	2		3		1	1	1	2	1	1	2	1	2	2	0	1	2	2	0	1	3		2	4	2		2	2		1	2
May 16, 2021 7:14:26 PM	uuid:5809e1e3-8803-4319-bb40-ae9c10a6f107	13	15	1	Miembe Saba	May 7, 2021	1047	1	68	1047	1	uuid:5809e1e3-8803-4319-bb40-ae9c10a6f107/household-information[2]	3	2	3	52	2	2		3		1	1	1	2	1	1	2	0	0	3	0	0	0	3	0	1	3		4	2	2		1	2		2	2
May 16, 2021 7:14:26 PM	uuid:5809e1e3-8803-4319-bb40-ae9c10a6f107	13	15	1	Miembe Saba	May 7, 2021	1047	1	68	1047	1	uuid:5809e1e3-8803-4319-bb40-ae9c10a6f107/household-information[3]	3	3	6	42	2	3		5		1	1	1	2	1	1	2	0	0	3	0	0	0	3	0	1	3		4	2	2		1	2		2	2
May 16, 2021 7:14:27 PM	uuid:a1c08b9a-ccab-425c-ab56-1edc836828b9	13	15	1	Miembe Saba	May 7, 2021	1048	1	25	1048	2	uuid:a1c08b9a-ccab-425c-ab56-1edc836828b9/household-information[4]	4	4	3	1	1	0		0		1	1	1	2	2	2	2	1	0	3	0	1	0	3	0	1	3		4	2	2		2	2		2	2
May 16, 2021 7:14:27 PM	uuid:a1c08b9a-ccab-425c-ab56-1edc836828b9	13	15	1	Miembe Saba	May 7, 2021	1048	1	25	1048	2	uuid:a1c08b9a-ccab-425c-ab56-1edc836828b9/household-information[1]	4	1	1	27	1	2		3		1	1	1	2	2	2	2	1	0	3	0	1	0	3	0	1	3		4	2	2		2	2		2	2
May 16, 2021 7:14:27 PM	uuid:a1c08b9a-ccab-425c-ab56-1edc836828b9	13	15	1	Miembe Saba	May 7, 2021	1048	1	25	1048	2	uuid:a1c08b9a-ccab-425c-ab56-1edc836828b9/household-information[3]	4	3	4	26	1	2		3		1	1	1	2	2	2	2	1	0	3	0	1	0	3	0	1	3		4	2	2		2	2		2	2
May 16, 2021 7:14:27 PM	uuid:a1c08b9a-ccab-425c-ab56-1edc836828b9	13	15	1	Miembe Saba	May 7, 2021	1048	1	25	1048	2	uuid:a1c08b9a-ccab-425c-ab56-1edc836828b9/household-information[2]	4	2	2	25	2	0		3		1	1	1	2	2	1	2	1	0	3	0	1	0	3	0	2	3		4	2	2		2	2		2	2
May 16, 2021 6:57:25 PM	uuid:9425db72-5cee-4a85-9c89-966fc6ce39ae	7	12	1	Mswelezi	May 10, 2021	1049	1	27	1049	1	uuid:9425db72-5cee-4a85-9c89-966fc6ce39ae/household-information[1]	3	1	1	27	1	0		3		1	2	1	2	1	1	2	0	1	2	0	0	0	0	0	1	3		4	2	2		2	2		2	2
May 16, 2021 6:57:25 PM	uuid:9425db72-5cee-4a85-9c89-966fc6ce39ae	7	12	1	Mswelezi	May 10, 2021	1049	1	27	1049	1	uuid:9425db72-5cee-4a85-9c89-966fc6ce39ae/household-information[2]	3	2	2	25	2	2		3		1	2	1	2	1	1	2	0	1	2	0	0	0	0	0	1	3		4	2	2		2	2		2	2
May 16, 2021 6:57:26 PM	uuid:fc791eed-5cfd-47a7-9d0d-2ae5359131b6	2	12	1	Mswelezi	May 10, 2021	1050	1	23	1050	1	uuid:fc791eed-5cfd-47a7-9d0d-2ae5359131b6/household-information[2]	4	2	2	21	2	2		3		1	2	2	0	1	1	2	0	2	2	0	0	0	0	0	1	3		4	2	2		2	2		2	2
May 16, 2021 6:57:26 PM	uuid:fc791eed-5cfd-47a7-9d0d-2ae5359131b6	2	12	1	Mswelezi	May 10, 2021	1050	1	23	1050	1	uuid:fc791eed-5cfd-47a7-9d0d-2ae5359131b6/household-information[3]	4	3	3	9	1	2		0		1	2	2	0	1	1	2	0	2	2	0	0	0	0	0	1	3		4	2	2		2	2		2	2
May 16, 2021 6:57:26 PM	uuid:fc791eed-5cfd-47a7-9d0d-2ae5359131b6	2	12	1	Mswelezi	May 10, 2021	1050	1	23	1050	1	uuid:fc791eed-5cfd-47a7-9d0d-2ae5359131b6/household-information[4]	4	4	3	8	2	2		0		1	2	2	0	1	1	2	0	2	2	0	0	0	0	0	1	3		4	2	2		2	2		2	2
May 16, 2021 6:57:26 PM	uuid:fc791eed-5cfd-47a7-9d0d-2ae5359131b6	2	12	1	Mswelezi	May 10, 2021	1050	1	23	1050	1	uuid:fc791eed-5cfd-47a7-9d0d-2ae5359131b6/household-information[1]	4	1	1	23	1	0		3		1	2	2	0	1	1	2	0	2	2	0	0	0	0	0	1	3		4	2	2		2	2		2	2
May 16, 2021 7:05:01 PM	uuid:f8dfd7b7-8030-4ad7-9f3d-1d5ea7003857	3	16	1	Miembe Saba	May 6, 2021	1051	1	75	1051	1	uuid:f8dfd7b7-8030-4ad7-9f3d-1d5ea7003857/household-information[2]	3	2	3	50	1	2		1		1	1	1	0	1	1	2	0	1	2	0	0	0	2	0	1	3		4	5	3		2	2		2	2
May 16, 2021 7:05:01 PM	uuid:f8dfd7b7-8030-4ad7-9f3d-1d5ea7003857	3	16	1	Miembe Saba	May 6, 2021	1051	1	75	1051	1	uuid:f8dfd7b7-8030-4ad7-9f3d-1d5ea7003857/household-information[1]	3	1	1	75	2	0		3		1	1	1	0	1	1	2	0	1	2	0	0	0	2	0	1	3		4	5	3		2	2		2	2
May 16, 2021 7:05:01 PM	uuid:f8dfd7b7-8030-4ad7-9f3d-1d5ea7003857	3	16	1	Miembe Saba	May 6, 2021	1051	1	75	1051	1	uuid:f8dfd7b7-8030-4ad7-9f3d-1d5ea7003857/household-information[3]	3	3	6	15	1	3		0		2		1	0	1	1	2	0	1	2	0	0	0	2	0	1	3		4	5	3		2	2		2	2
May 16, 2021 7:05:04 PM	uuid:4a960a20-2c5f-449b-a698-3edd32f25ced	14	16	1	Miembe Saba	May 6, 2021	1052	1	81	1052	3	uuid:4a960a20-2c5f-449b-a698-3edd32f25ced/household-information[2]	6	2	2	75	2	0		0		1	2	2	0	1	1	2	0	3	3	0	0	1	0	0	1	3		6	4	2		2	2		2	2
May 16, 2021 7:05:04 PM	uuid:4a960a20-2c5f-449b-a698-3edd32f25ced	14	16	1	Miembe Saba	May 6, 2021	1052	1	81	1052	3	uuid:4a960a20-2c5f-449b-a698-3edd32f25ced/household-information[4]	6	4	6	14	1	3		0		2		2	0	1	1	2	0	3	3	0	0	1	0	0	1	3		6	4	2		2	2		2	2
May 16, 2021 7:05:04 PM	uuid:4a960a20-2c5f-449b-a698-3edd32f25ced	14	16	1	Miembe Saba	May 6, 2021	1052	1	81	1052	3	uuid:4a960a20-2c5f-449b-a698-3edd32f25ced/household-information[3]	6	3	3	50	2	2		3		2		2	0	1	1	2	0	3	3	0	0	1	0	0	1	3		6	4	2		2	2		2	2
May 16, 2021 7:05:04 PM	uuid:4a960a20-2c5f-449b-a698-3edd32f25ced	14	16	1	Miembe Saba	May 6, 2021	1052	1	81	1052	3	uuid:4a960a20-2c5f-449b-a698-3edd32f25ced/household-information[1]	6	1	1	81	1	0		0		1	2	2	0	1	1	2	0	3	3	0	0	1	0	0	1	3		6	4	2		2	2		2	2
May 16, 2021 7:05:04 PM	uuid:4a960a20-2c5f-449b-a698-3edd32f25ced	14	16	1	Miembe Saba	May 6, 2021	1052	1	81	1052	3	uuid:4a960a20-2c5f-449b-a698-3edd32f25ced/household-information[5]	6	5	6	13	2	2		0		2		2	0	1	1	2	0	3	3	0	0	1	0	0	1	3		6	4	2		2	2		2	2
May 16, 2021 7:05:07 PM	uuid:19fdfa9c-4540-48de-957f-c9af84496378	3	16	1	Miembe Saba	May 6, 2021	1053	1	37	1053	1	uuid:19fdfa9c-4540-48de-957f-c9af84496378/household-information[1]	3	1	1	37	2	2		3		1	1	1	2	1	2	2	0	2	1	1	0	2	1	0	1	3		4	4	5	steel bar	2	2		2	5
May 16, 2021 7:05:07 PM	uuid:19fdfa9c-4540-48de-957f-c9af84496378	3	16	1	Miembe Saba	May 6, 2021	1053	1	37	1053	1	uuid:19fdfa9c-4540-48de-957f-c9af84496378/household-information[3]	3	3	3	11	2	2		0		1	1	1	2	1	2	2	0	2	1	1	0	2	1	0	1	3		4	4	5	steel bar	2	2		2	5
May 16, 2021 7:05:09 PM	uuid:6c6b58e7-d7be-4d76-8251-db1f0b9754ac	14	16	1	Miembe Saba	May 6, 2021	1054	1	31	1054	1	uuid:6c6b58e7-d7be-4d76-8251-db1f0b9754ac/household-information[1]	3	1	1	31	2	2		3		2		1	2	1	2	2	0	2	1	0	0	2	1	0	2	3		0	1	5	Net & processed wood	1	2		2	2
May 16, 2021 7:05:09 PM	uuid:6c6b58e7-d7be-4d76-8251-db1f0b9754ac	14	16	1	Miembe Saba	May 6, 2021	1054	1	31	1054	1	uuid:6c6b58e7-d7be-4d76-8251-db1f0b9754ac/household-information[3]	3	3	3	14	2	3		0		2		1	2	1	1	2	0	2	1	0	0	2	1	0	2	3		0	1	5	Net & processed wood	1	2		2	2
May 16, 2021 7:05:16 PM	uuid:62400f3a-f428-4329-a0a8-532432d907cb	3	16	1	Miembe Saba	May 6, 2021	1055	1	30	1055	2	uuid:62400f3a-f428-4329-a0a8-532432d907cb/household-information[7]	7	7	11	4	2	0		0		2		1	2	1	1	2	1	2	4	0	1	2	4	0	1	3		4	2	1		2	2		2	4
May 16, 2021 7:05:16 PM	uuid:62400f3a-f428-4329-a0a8-532432d907cb	3	16	1	Miembe Saba	May 6, 2021	1055	1	30	1055	2	uuid:62400f3a-f428-4329-a0a8-532432d907cb/household-information[4]	7	4	4	32	1	2		3		1	1	1	2	1	1	2	1	2	4	0	1	2	4	0	1	3		4	2	1		2	2		2	4
May 16, 2021 7:05:16 PM	uuid:62400f3a-f428-4329-a0a8-532432d907cb	3	16	1	Miembe Saba	May 6, 2021	1055	1	30	1055	2	uuid:62400f3a-f428-4329-a0a8-532432d907cb/household-information[1]	7	1	1	32	1	2		3		2		1	2	1	1	2	1	2	4	0	1	2	4	0	1	3		4	2	1		2	2		2	4
May 16, 2021 7:05:16 PM	uuid:62400f3a-f428-4329-a0a8-532432d907cb	3	16	1	Miembe Saba	May 6, 2021	1055	1	30	1055	2	uuid:62400f3a-f428-4329-a0a8-532432d907cb/household-information[3]	7	3	7	28	2	2		3		1	1	1	2	1	1	2	1	2	4	0	1	2	4	0	1	3		4	2	1		2	2		2	4
May 16, 2021 7:05:16 PM	uuid:62400f3a-f428-4329-a0a8-532432d907cb	3	16	1	Miembe Saba	May 6, 2021	1055	1	30	1055	2	uuid:62400f3a-f428-4329-a0a8-532432d907cb/household-information[6]	7	6	11	5	2	1		0		1	1	1	2	1	1	2	1	2	4	0	1	2	4	0	1	3		4	2	1		2	2		2	4
May 16, 2021 7:05:16 PM	uuid:62400f3a-f428-4329-a0a8-532432d907cb	3	16	1	Miembe Saba	May 6, 2021	1055	1	30	1055	2	uuid:62400f3a-f428-4329-a0a8-532432d907cb/household-information[5]	7	5	11	11	2	2		0		1	1	1	2	1	1	2	1	2	4	0	1	2	4	0	1	3		4	2	1		2	2		2	4
May 16, 2021 7:05:27 PM	uuid:b2de9558-3af5-42b8-b364-f38bcead2aca	14	16	1	Miembe Saba	May 6, 2021	1056	1	45	1056	2	uuid:b2de9558-3af5-42b8-b364-f38bcead2aca/household-information[4]	6	4	6	11	2	2		0		1	1	1	2	1	1	2	1	3	2	0	1	3	2	0	1	3		2	4	5	Processed wood & steel bar	2	2		2	2
May 16, 2021 7:05:27 PM	uuid:b2de9558-3af5-42b8-b364-f38bcead2aca	14	16	1	Miembe Saba	May 6, 2021	1056	1	45	1056	2	uuid:b2de9558-3af5-42b8-b364-f38bcead2aca/household-information[2]	6	2	2	45	2	2		3		1	1	1	2	1	1	2	1	3	2	0	1	3	2	0	1	3		2	4	5	Processed wood & steel bar	2	2		2	2
May 16, 2021 7:05:27 PM	uuid:b2de9558-3af5-42b8-b364-f38bcead2aca	14	16	1	Miembe Saba	May 6, 2021	1056	1	45	1056	2	uuid:b2de9558-3af5-42b8-b364-f38bcead2aca/household-information[3]	6	3	3	15	2	2		3		1	1	1	2	1	1	2	1	3	2	0	1	3	2	0	1	3		2	4	5	Processed wood & steel bar	2	2		2	2
May 16, 2021 7:05:27 PM	uuid:b2de9558-3af5-42b8-b364-f38bcead2aca	14	16	1	Miembe Saba	May 6, 2021	1056	1	45	1056	2	uuid:b2de9558-3af5-42b8-b364-f38bcead2aca/household-information[5]	6	5	6	10	2	2		0		1	1	1	2	1	1	2	1	3	2	0	1	3	2	0	1	3		2	4	5	Processed wood & steel bar	2	2		2	2
May 16, 2021 7:05:27 PM	uuid:b2de9558-3af5-42b8-b364-f38bcead2aca	14	16	1	Miembe Saba	May 6, 2021	1056	1	45	1056	2	uuid:b2de9558-3af5-42b8-b364-f38bcead2aca/household-information[1]	6	1	1	50	1	2		3		1	1	1	2	1	1	2	1	3	2	0	1	3	2	0	1	3		2	4	5	Processed wood & steel bar	2	2		2	2
May 16, 2021 7:05:30 PM	uuid:c171edd6-4158-4ab1-b2ce-587191b3ec32	3	16	1	Miembe Saba	May 7, 2021	1057	1	41	1057	1	uuid:c171edd6-4158-4ab1-b2ce-587191b3ec32/household-information[1]	4	1	1	41	1	2		3		1	2	1	2	1	1	2	0	3	1	0	0	3	1	0	1	3		2	4	2		2	2		2	2
May 16, 2021 7:05:30 PM	uuid:c171edd6-4158-4ab1-b2ce-587191b3ec32	3	16	1	Miembe Saba	May 7, 2021	1057	1	41	1057	1	uuid:c171edd6-4158-4ab1-b2ce-587191b3ec32/household-information[4]	4	4	3	11	2	2		0		2		1	2	1	1	2	0	3	1	0	0	3	1	0	1	3		2	4	2		2	2		2	2
May 16, 2021 7:05:30 PM	uuid:c171edd6-4158-4ab1-b2ce-587191b3ec32	3	16	1	Miembe Saba	May 7, 2021	1057	1	41	1057	1	uuid:c171edd6-4158-4ab1-b2ce-587191b3ec32/household-information[3]	4	3	3	13	2	2		0		2		1	2	1	1	2	0	3	1	0	0	3	1	0	1	3		2	4	2		2	2		2	2
May 16, 2021 7:05:32 PM	uuid:33d6efd2-673c-4ae7-8c36-b20a91328c80	14	16	1	Miembe Saba	May 7, 2021	1058	1	63	1058	2	uuid:33d6efd2-673c-4ae7-8c36-b20a91328c80/household-information[3]	5	3	3	6	2	2		0		1	1	1	2	1	1	2	0	2	3	0	0	1	3	0	1	3		6	1	2		1	2		2	2
May 16, 2021 7:05:32 PM	uuid:33d6efd2-673c-4ae7-8c36-b20a91328c80	14	16	1	Miembe Saba	May 7, 2021	1058	1	63	1058	2	uuid:33d6efd2-673c-4ae7-8c36-b20a91328c80/household-information[5]	5	5	3	15	1	3		0		2		1	2	1	1	2	0	2	3	0	0	1	3	0	1	3		6	1	2		1	2		2	2
May 16, 2021 7:05:32 PM	uuid:33d6efd2-673c-4ae7-8c36-b20a91328c80	14	16	1	Miembe Saba	May 7, 2021	1058	1	63	1058	2	uuid:33d6efd2-673c-4ae7-8c36-b20a91328c80/household-information[1]	5	1	1	63	1	2		3		1	1	1	2	1	1	2	0	2	3	0	0	1	3	0	1	3		6	1	2		1	2		2	2
May 16, 2021 7:05:32 PM	uuid:33d6efd2-673c-4ae7-8c36-b20a91328c80	14	16	1	Miembe Saba	May 7, 2021	1058	1	63	1058	2	uuid:33d6efd2-673c-4ae7-8c36-b20a91328c80/household-information[2]	5	2	2	32	2	2		3		1	1	1	2	1	1	2	0	2	3	0	0	1	3	0	1	3		6	1	2		1	2		2	2
May 16, 2021 7:05:34 PM	uuid:d5a80224-a564-4309-8121-66d466f3b5de	3	16	1	Miembe Saba	May 7, 2021	1059	1	35	1059	1	uuid:d5a80224-a564-4309-8121-66d466f3b5de/household-information[4]	8	4	3	14	2	2		3		1	1	1	2	1	1	2	1	4	3	0	1	4	3	0	1	3		6	4	5	Steel bar & net	2	2		2	2
May 16, 2021 7:05:34 PM	uuid:d5a80224-a564-4309-8121-66d466f3b5de	3	16	1	Miembe Saba	May 7, 2021	1059	1	35	1059	1	uuid:d5a80224-a564-4309-8121-66d466f3b5de/household-information[3]	8	3	3	18	1	2		3		1	1	1	2	1	1	2	1	4	3	0	1	4	3	0	1	3		6	4	5	Steel bar & net	2	2		2	2
May 16, 2021 7:05:34 PM	uuid:d5a80224-a564-4309-8121-66d466f3b5de	3	16	1	Miembe Saba	May 7, 2021	1059	1	35	1059	1	uuid:d5a80224-a564-4309-8121-66d466f3b5de/household-information[8]	8	8	3	2	1	0		0		1	1	1	2	1	1	2	1	4	3	0	1	4	3	0	1	3		6	4	5	Steel bar & net	2	2		2	2
May 16, 2021 7:05:34 PM	uuid:d5a80224-a564-4309-8121-66d466f3b5de	3	16	1	Miembe Saba	May 7, 2021	1059	1	35	1059	1	uuid:d5a80224-a564-4309-8121-66d466f3b5de/household-information[1]	8	1	1	35	1	2		3		1	1	1	2	1	1	2	1	4	3	0	1	4	3	0	1	3		6	4	5	Steel bar & net	2	2		2	2
May 16, 2021 7:05:34 PM	uuid:d5a80224-a564-4309-8121-66d466f3b5de	3	16	1	Miembe Saba	May 7, 2021	1059	1	35	1059	1	uuid:d5a80224-a564-4309-8121-66d466f3b5de/household-information[5]	8	5	3	10	1	2		0		1	1	1	2	1	1	2	1	4	3	0	1	4	3	0	1	3		6	4	5	Steel bar & net	2	2		2	2
May 16, 2021 7:05:34 PM	uuid:d5a80224-a564-4309-8121-66d466f3b5de	3	16	1	Miembe Saba	May 7, 2021	1059	1	35	1059	1	uuid:d5a80224-a564-4309-8121-66d466f3b5de/household-information[6]	8	6	3	8	2	2		0		1	1	1	2	1	1	2	1	4	3	0	1	4	3	0	1	3		6	4	5	Steel bar & net	2	2		2	2
May 16, 2021 7:05:34 PM	uuid:d5a80224-a564-4309-8121-66d466f3b5de	3	16	1	Miembe Saba	May 7, 2021	1059	1	35	1059	1	uuid:d5a80224-a564-4309-8121-66d466f3b5de/household-information[7]	8	7	3	5	2	2		0		1	1	1	2	1	1	2	1	4	3	0	1	4	3	0	1	3		6	4	5	Steel bar & net	2	2		2	2
May 16, 2021 6:57:27 PM	uuid:ac59fe01-d5f4-4cff-b3aa-6f2a04643273	7	12	1	Mswelezi	May 10, 2021	1060	1	55	1060	1	uuid:ac59fe01-d5f4-4cff-b3aa-6f2a04643273/household-information[1]	2	1	1	55	1	0		3		1	2	2	0	1	1	2	0	0	2	0	0	0	0	0	1	3		4	2	2		2	2		2	2
May 16, 2021 7:13:32 PM	uuid:ee029c72-bb22-4eab-a9a9-9e98362e9f6d	16	17	1	Miembe Saba	May 6, 2021	1062	1	49	1062	1	uuid:ee029c72-bb22-4eab-a9a9-9e98362e9f6d/household-information[1]	5	1	1	49	1	2		3		1	1	1	2	1	1	2	0	1	4	0	0	0	2	0	1	3		4	8	2		2	2		2	5
May 16, 2021 7:13:32 PM	uuid:ee029c72-bb22-4eab-a9a9-9e98362e9f6d	16	17	1	Miembe Saba	May 6, 2021	1062	1	49	1062	1	uuid:ee029c72-bb22-4eab-a9a9-9e98362e9f6d/household-information[5]	5	5	3	11	2	2		0		1	2	1	2	1	1	2	0	1	4	0	0	0	2	0	1	3		4	8	2		2	2		2	5
May 16, 2021 7:13:32 PM	uuid:ee029c72-bb22-4eab-a9a9-9e98362e9f6d	16	17	1	Miembe Saba	May 6, 2021	1062	1	49	1062	1	uuid:ee029c72-bb22-4eab-a9a9-9e98362e9f6d/household-information[2]	5	2	2	40	2	2		3		1	1	1	2	1	1	2	0	1	4	0	0	0	2	0	1	3		4	8	2		2	2		2	5
May 16, 2021 7:13:32 PM	uuid:ee029c72-bb22-4eab-a9a9-9e98362e9f6d	16	17	1	Miembe Saba	May 6, 2021	1062	1	49	1062	1	uuid:ee029c72-bb22-4eab-a9a9-9e98362e9f6d/household-information[4]	5	4	3	20	1	2		3		1	2	1	2	1	1	2	0	1	4	0	0	0	2	0	1	3		4	8	2		2	2		2	5
May 16, 2021 7:13:36 PM	uuid:f760a8e4-f2d6-49b6-9be5-32082fc8c15d	6	17	1	Miembe Saba	May 6, 2021	1063	1	41	1063	1	uuid:f760a8e4-f2d6-49b6-9be5-32082fc8c15d/household-information[2]	3	2	2	28	2	2		3		1	1	1	2	1	1	2	0	1	2	1	0	1	2	1	1	3		3	3	2		3	2		2	2
May 16, 2021 7:13:36 PM	uuid:f760a8e4-f2d6-49b6-9be5-32082fc8c15d	6	17	1	Miembe Saba	May 6, 2021	1063	1	41	1063	1	uuid:f760a8e4-f2d6-49b6-9be5-32082fc8c15d/household-information[1]	3	1	1	41	1	2		3		1	1	1	2	1	1	2	0	1	2	1	0	1	2	1	1	3		3	3	2		3	2		2	2
May 16, 2021 7:13:36 PM	uuid:f760a8e4-f2d6-49b6-9be5-32082fc8c15d	6	17	1	Miembe Saba	May 6, 2021	1063	1	41	1063	1	uuid:f760a8e4-f2d6-49b6-9be5-32082fc8c15d/household-information[3]	3	3	3	13	1	2		0		1	1	1	2	1	1	2	0	1	2	1	0	1	2	1	1	3		3	3	2		3	2		2	2
May 16, 2021 7:13:41 PM	uuid:1e56b085-036e-4e77-811b-3e9e6a7c12b4	16	17	1	Miembe Saba	May 6, 2021	1064	1	30	1064	2	uuid:1e56b085-036e-4e77-811b-3e9e6a7c12b4/household-information[1]	3	1	1	35	1	2		3		1	1	1	2	1	1	2	1	0	2	0	1	0	2	0	1	3		6	1	2		1	2		2	2
May 16, 2021 7:13:41 PM	uuid:1e56b085-036e-4e77-811b-3e9e6a7c12b4	16	17	1	Miembe Saba	May 6, 2021	1064	1	30	1064	2	uuid:1e56b085-036e-4e77-811b-3e9e6a7c12b4/household-information[3]	3	3	3	1	2	0		0		1	1	1	2	1	1	2	1	0	2	0	1	0	2	0	1	3		6	1	2		1	2		2	2
May 16, 2021 7:13:43 PM	uuid:54dd395d-38b8-41dc-b9c9-aedf1c22d502	6	17	1	Miembe Saba	May 7, 2021	1065	1	25	1065	1	uuid:54dd395d-38b8-41dc-b9c9-aedf1c22d502/household-information[1]	3	1	1	25	1	2		3		1	1	1	2	1	1	2	1	0	2	0	1	0	2	0	1	3		1	3	2		2	2		2	2
May 16, 2021 7:13:43 PM	uuid:54dd395d-38b8-41dc-b9c9-aedf1c22d502	6	17	1	Miembe Saba	May 7, 2021	1065	1	25	1065	1	uuid:54dd395d-38b8-41dc-b9c9-aedf1c22d502/household-information[2]	3	2	2	19	2	2		3		1	1	1	2	1	1	2	1	0	2	0	1	0	2	0	1	3		1	3	2		2	2		2	2
May 16, 2021 7:13:43 PM	uuid:54dd395d-38b8-41dc-b9c9-aedf1c22d502	6	17	1	Miembe Saba	May 7, 2021	1065	1	25	1065	1	uuid:54dd395d-38b8-41dc-b9c9-aedf1c22d502/household-information[3]	3	3	3	1	2	0		0		1	1	1	2	1	1	2	1	0	2	0	1	0	2	0	1	3		1	3	2		2	2		2	2
May 16, 2021 7:13:45 PM	uuid:0efa9b16-bec5-4ca7-83a7-efa531256320	16	17	1	Miembe Saba	May 7, 2021	1068	1	69	1068	1	uuid:0efa9b16-bec5-4ca7-83a7-efa531256320/household-information[4]	5	4	3	14	2	2		0		1	1	2	1	1	1	2	0	2	3	0	0	2	2	0	1	3		4	1	1		1	2		2	2
May 16, 2021 7:13:45 PM	uuid:0efa9b16-bec5-4ca7-83a7-efa531256320	16	17	1	Miembe Saba	May 7, 2021	1068	1	69	1068	1	uuid:0efa9b16-bec5-4ca7-83a7-efa531256320/household-information[2]	5	2	2	47	2	2		3		1	1	2	1	1	1	2	0	2	3	0	0	2	2	0	1	3		4	1	1		1	2		2	2
May 16, 2021 7:13:45 PM	uuid:0efa9b16-bec5-4ca7-83a7-efa531256320	16	17	1	Miembe Saba	May 7, 2021	1068	1	69	1068	1	uuid:0efa9b16-bec5-4ca7-83a7-efa531256320/household-information[1]	5	1	1	69	1	1		3		1	1	2	1	1	1	2	0	2	3	0	0	2	2	0	1	3		4	1	1		1	2		2	2
May 16, 2021 7:13:45 PM	uuid:0efa9b16-bec5-4ca7-83a7-efa531256320	16	17	1	Miembe Saba	May 7, 2021	1068	1	69	1068	1	uuid:0efa9b16-bec5-4ca7-83a7-efa531256320/household-information[5]	5	5	3	9	2	2		0		1	1	2	1	1	1	2	0	2	3	0	0	2	2	0	1	3		4	1	1		1	2		2	2
May 16, 2021 7:13:45 PM	uuid:0efa9b16-bec5-4ca7-83a7-efa531256320	16	17	1	Miembe Saba	May 7, 2021	1068	1	69	1068	1	uuid:0efa9b16-bec5-4ca7-83a7-efa531256320/household-information[3]	5	3	3	20	2	3		3		2		2	1	1	1	2	0	2	3	0	0	2	2	0	1	3		4	1	1		1	2		2	2
May 16, 2021 7:01:04 PM	uuid:c5d80bfc-8ff1-452d-93f9-186e635d115a	5	11	1	Tobora	May 11, 2021	1070	1	72	1070	1	uuid:c5d80bfc-8ff1-452d-93f9-186e635d115a/household-information[1]	4	1	1	72	1	2		3		1	1	1	2	1	1	2	0	2	2	0	0	2	2	0	1	3		4	5	2		2	2		2	2
May 16, 2021 7:01:04 PM	uuid:c5d80bfc-8ff1-452d-93f9-186e635d115a	5	11	1	Tobora	May 11, 2021	1070	1	72	1070	1	uuid:c5d80bfc-8ff1-452d-93f9-186e635d115a/household-information[4]	4	4	4	7	2	0		0		1	1	1	2	1	1	2	0	2	2	0	0	2	2	0	1	3		4	5	2		2	2		2	2
May 16, 2021 7:01:04 PM	uuid:c5d80bfc-8ff1-452d-93f9-186e635d115a	5	11	1	Tobora	May 11, 2021	1070	1	72	1070	1	uuid:c5d80bfc-8ff1-452d-93f9-186e635d115a/household-information[3]	4	3	6	11	2	2		0		1	1	1	2	1	1	2	0	2	2	0	0	2	2	0	1	3		4	5	2		2	2		2	2
May 16, 2021 7:01:04 PM	uuid:c5d80bfc-8ff1-452d-93f9-186e635d115a	5	11	1	Tobora	May 11, 2021	1070	1	72	1070	1	uuid:c5d80bfc-8ff1-452d-93f9-186e635d115a/household-information[2]	4	2	2	59	2	2		3		1	1	1	2	1	1	2	0	2	2	0	0	2	2	0	1	3		4	5	2		2	2		2	2
May 16, 2021 7:05:41 PM	uuid:f6064804-a35d-42c0-8ba6-9bfbfa38beae	10	13	1	Mswelezi	May 10, 2021	1071	1	25	1071	2	uuid:f6064804-a35d-42c0-8ba6-9bfbfa38beae/household-information[4]	4	4	3	1	2	0		0		1	1	1	4	1	1	2	2	0	1	0	2	0	1	0	1	3		6	7	5	steel bar	1	5	Processed wood	2	6
May 16, 2021 7:05:41 PM	uuid:f6064804-a35d-42c0-8ba6-9bfbfa38beae	10	13	1	Mswelezi	May 10, 2021	1071	1	25	1071	2	uuid:f6064804-a35d-42c0-8ba6-9bfbfa38beae/household-information[2]	4	2	2	25	2	3		2		1	1	1	4	1	1	2	2	0	1	0	2	0	1	0	1	3		6	7	5	steel bar	1	5	Processed wood	2	6
May 16, 2021 7:05:41 PM	uuid:f6064804-a35d-42c0-8ba6-9bfbfa38beae	10	13	1	Mswelezi	May 10, 2021	1071	1	25	1071	2	uuid:f6064804-a35d-42c0-8ba6-9bfbfa38beae/household-information[1]	4	1	1	30	1	4		3		2		1	4	1	1	2	2	0	1	0	2	0	1	0	1	3		6	7	5	steel bar	1	5	Processed wood	2	6
May 16, 2021 7:05:43 PM	uuid:f575c268-34f1-4414-ae9c-30ce4e8c461f	9	13	1	Mswelezi	May 10, 2021	1072	1	31	1072	1	uuid:f575c268-34f1-4414-ae9c-30ce4e8c461f/household-information[3]	4	3	3	6	1	2		0		1	1	1	2	1	1	2	1	1	2	0	1	1	2	0	1	3		6	1	5	Processed wood	1	5	Processed wood	2	2
May 16, 2021 7:05:43 PM	uuid:f575c268-34f1-4414-ae9c-30ce4e8c461f	9	13	1	Mswelezi	May 10, 2021	1072	1	31	1072	1	uuid:f575c268-34f1-4414-ae9c-30ce4e8c461f/household-information[4]	4	4	3	4	1	1		0		1	1	1	2	1	1	2	1	1	2	0	1	1	2	0	1	3		6	1	5	Processed wood	1	5	Processed wood	2	2
May 16, 2021 7:05:43 PM	uuid:f575c268-34f1-4414-ae9c-30ce4e8c461f	9	13	1	Mswelezi	May 10, 2021	1072	1	31	1072	1	uuid:f575c268-34f1-4414-ae9c-30ce4e8c461f/household-information[2]	4	2	2	26	2	2		3		1	1	1	2	1	1	2	1	1	2	0	1	1	2	0	1	3		6	1	5	Processed wood	1	5	Processed wood	2	2
May 16, 2021 6:57:29 PM	uuid:f5243fbd-d044-433a-b57e-8b44383b6957	7	12	1	Miembe Saba	May 11, 2021	1074	1	30	1074	1	uuid:f5243fbd-d044-433a-b57e-8b44383b6957/household-information[1]	1	1	1	30	2	0		3		1	1	2	0	1	1	2	0	0	1	0	0	0	1	0	1	3		4	2	2		1	2		2	2
May 16, 2021 7:05:48 PM	uuid:f376b00e-f1f1-4f33-a377-1c768aeb6e53	9	13	1	Tobora	May 12, 2021	1075	1	35	1075	1	uuid:f376b00e-f1f1-4f33-a377-1c768aeb6e53/household-information[6]	7	6	3	3	2	0		0		1	1	1	2	2	2	2	2	3	2	0	2	3	2	0	2	3		4	0			1	5	Processed wood	2	2
May 16, 2021 7:05:48 PM	uuid:f376b00e-f1f1-4f33-a377-1c768aeb6e53	9	13	1	Tobora	May 12, 2021	1075	1	35	1075	1	uuid:f376b00e-f1f1-4f33-a377-1c768aeb6e53/household-information[7]	7	7	3	3	1	0		0		1	1	1	2	2	1	2	2	3	2	0	2	3	2	0	1	3		4	5	5	Processed wood	1	5	Processed wood	2	2
May 16, 2021 7:05:48 PM	uuid:f376b00e-f1f1-4f33-a377-1c768aeb6e53	9	13	1	Tobora	May 12, 2021	1075	1	35	1075	1	uuid:f376b00e-f1f1-4f33-a377-1c768aeb6e53/household-information[2]	7	2	2	32	2	2		3		1	1	1	2	2	2	2	2	3	2	0	2	3	2	0	2	3		4	0			1	5	Processed wood	2	2
May 16, 2021 7:05:48 PM	uuid:f376b00e-f1f1-4f33-a377-1c768aeb6e53	9	13	1	Tobora	May 12, 2021	1075	1	35	1075	1	uuid:f376b00e-f1f1-4f33-a377-1c768aeb6e53/household-information[3]	7	3	3	17	2	3		0		1	1	1	2	2	2	2	2	3	2	0	2	3	2	0	2	3		4	0			1	5	Processed wood	2	2
May 16, 2021 7:05:48 PM	uuid:f376b00e-f1f1-4f33-a377-1c768aeb6e53	9	13	1	Tobora	May 12, 2021	1075	1	35	1075	1	uuid:f376b00e-f1f1-4f33-a377-1c768aeb6e53/household-information[1]	7	1	1	35	1	2		3		1	1	1	2	2	2	2	2	3	2	0	2	3	2	0	2	3		4	0			1	5	Processed wood	2	2
May 16, 2021 7:05:48 PM	uuid:f376b00e-f1f1-4f33-a377-1c768aeb6e53	9	13	1	Tobora	May 12, 2021	1075	1	35	1075	1	uuid:f376b00e-f1f1-4f33-a377-1c768aeb6e53/household-information[4]	7	4	3	15	2	3		0		1	1	1	2	2	2	2	2	3	2	0	2	3	2	0	2	3		4	0			1	5	Processed wood	2	2
May 16, 2021 6:57:27 PM	uuid:83561ca9-f0ab-4543-a5d9-d9d9f8107bd8	2	12	1	Mikuyuni	May 10, 2021	1076	1	25	1076	3	uuid:83561ca9-f0ab-4543-a5d9-d9d9f8107bd8/household-information[2]	3	2	9	47	2	2		2		1	2	1	3	1	1	2	0	0	3	0	0	0	0	0	1	3		4	3	2		2	2		2	2
May 16, 2021 6:57:27 PM	uuid:83561ca9-f0ab-4543-a5d9-d9d9f8107bd8	2	12	1	Mikuyuni	May 10, 2021	1076	1	25	1076	3	uuid:83561ca9-f0ab-4543-a5d9-d9d9f8107bd8/household-information[1]	3	1	1	25	2	3		2		1	1	1	3	1	1	2	0	0	3	0	0	0	0	0	1	3		4	3	2		2	2		2	2
May 16, 2021 7:17:10 PM	uuid:d89fd749-e807-4cc3-b048-ce63127d04fd	4	14	1	Mswelezi	May 10, 2021	1077	1	26	1077	2	uuid:d89fd749-e807-4cc3-b048-ce63127d04fd/household-information[4]	4	4	3	4	2	0		0		1	1	1	2	1	1	2	1	1	2	0	1	1	2	0	1	3		3	1	1		1	1		2	2
May 16, 2021 7:17:10 PM	uuid:d89fd749-e807-4cc3-b048-ce63127d04fd	4	14	1	Mswelezi	May 10, 2021	1077	1	26	1077	2	uuid:d89fd749-e807-4cc3-b048-ce63127d04fd/household-information[3]	4	3	3	9	1	2		0		1	1	1	2	1	1	2	1	1	2	0	1	1	2	0	1	3		3	1	1		1	1		2	2
May 16, 2021 7:17:10 PM	uuid:d89fd749-e807-4cc3-b048-ce63127d04fd	4	14	1	Mswelezi	May 10, 2021	1077	1	26	1077	2	uuid:d89fd749-e807-4cc3-b048-ce63127d04fd/household-information[2]	4	2	1	36	1	2		3		1	1	1	2	1	1	2	1	1	2	0	1	1	2	0	1	3		3	1	1		1	1		2	2
May 16, 2021 7:17:10 PM	uuid:d89fd749-e807-4cc3-b048-ce63127d04fd	4	14	1	Mswelezi	May 10, 2021	1077	1	26	1077	2	uuid:d89fd749-e807-4cc3-b048-ce63127d04fd/household-information[1]	4	1	2	26	2	2		3		1	1	1	2	1	1	2	1	1	2	0	1	1	2	0	1	3		3	1	1		1	1		2	2
May 16, 2021 7:17:11 PM	uuid:f0d91edb-efb5-425e-b62e-817ec1b05a6a	11	14	1	Mswelezi	May 10, 2021	1078	1	39	1078	2	uuid:f0d91edb-efb5-425e-b62e-817ec1b05a6a/household-information[7]	9	7	3	3	2	0		0		1	1	2	2	1	1	2	3	3	3	0	3	3	3	0	1	3		6	3	1		2	2		2	2
May 16, 2021 7:17:11 PM	uuid:f0d91edb-efb5-425e-b62e-817ec1b05a6a	11	14	1	Mswelezi	May 10, 2021	1078	1	39	1078	2	uuid:f0d91edb-efb5-425e-b62e-817ec1b05a6a/household-information[8]	9	8	3	2	2	0		0		1	1	2	2	1	1	2	3	3	3	0	3	3	3	0	1	3		6	3	1		2	2		2	2
May 16, 2021 7:17:11 PM	uuid:f0d91edb-efb5-425e-b62e-817ec1b05a6a	11	14	1	Mswelezi	May 10, 2021	1078	1	39	1078	2	uuid:f0d91edb-efb5-425e-b62e-817ec1b05a6a/household-information[4]	9	4	3	16	2	2		0		1	1	2	2	1	1	2	3	3	3	0	3	3	3	0	1	3		6	3	1		2	2		2	2
May 16, 2021 7:17:11 PM	uuid:f0d91edb-efb5-425e-b62e-817ec1b05a6a	11	14	1	Mswelezi	May 10, 2021	1078	1	39	1078	2	uuid:f0d91edb-efb5-425e-b62e-817ec1b05a6a/household-information[1]	9	1	2	39	2	2		3		1	1	2	2	1	1	2	3	3	3	0	3	3	3	0	1	3		6	3	1		2	2		2	2
May 16, 2021 7:17:11 PM	uuid:f0d91edb-efb5-425e-b62e-817ec1b05a6a	11	14	1	Mswelezi	May 10, 2021	1078	1	39	1078	2	uuid:f0d91edb-efb5-425e-b62e-817ec1b05a6a/household-information[5]	9	5	3	13	2	2		0		1	1	2	2	1	1	2	3	3	3	0	3	3	3	0	1	3		6	3	1		2	2		2	2
May 16, 2021 7:17:11 PM	uuid:f0d91edb-efb5-425e-b62e-817ec1b05a6a	11	14	1	Mswelezi	May 10, 2021	1078	1	39	1078	2	uuid:f0d91edb-efb5-425e-b62e-817ec1b05a6a/household-information[9]	9	9	3	2	1	0		0		1	1	2	2	1	1	2	3	3	3	0	3	3	3	0	1	3		6	3	1		2	2		2	2
May 16, 2021 7:17:11 PM	uuid:f0d91edb-efb5-425e-b62e-817ec1b05a6a	11	14	1	Mswelezi	May 10, 2021	1078	1	39	1078	2	uuid:f0d91edb-efb5-425e-b62e-817ec1b05a6a/household-information[2]	9	2	1	40	1	2		3		1	1	2	2	1	1	2	3	3	3	0	3	3	3	0	1	3		6	3	1		2	2		2	2
May 16, 2021 7:17:11 PM	uuid:f0d91edb-efb5-425e-b62e-817ec1b05a6a	11	14	1	Mswelezi	May 10, 2021	1078	1	39	1078	2	uuid:f0d91edb-efb5-425e-b62e-817ec1b05a6a/household-information[3]	9	3	3	18	2	3		3		1	1	2	2	1	1	2	3	3	3	0	3	3	3	0	1	3		6	3	1		2	2		2	2
May 16, 2021 7:17:12 PM	uuid:f52f268a-e3f7-44f3-8b7d-037d15eb02bf	11	14	1	Mswelezi	May 10, 2021	1079	1	33	1079	2	uuid:f52f268a-e3f7-44f3-8b7d-037d15eb02bf/household-information[5]	6	5	3	3	2	0		0		1	1	1	2	1	1	2	2	2	2	0	2	2	2	0	1	1		4	1	1		1	1		2	2
May 16, 2021 7:17:12 PM	uuid:f52f268a-e3f7-44f3-8b7d-037d15eb02bf	11	14	1	Mswelezi	May 10, 2021	1079	1	33	1079	2	uuid:f52f268a-e3f7-44f3-8b7d-037d15eb02bf/household-information[3]	6	3	3	10	1	2		0		1	1	1	2	1	1	2	2	2	2	0	2	2	2	0	1	1		4	1	1		1	1		2	2
May 16, 2021 7:17:12 PM	uuid:f52f268a-e3f7-44f3-8b7d-037d15eb02bf	11	14	1	Mswelezi	May 10, 2021	1079	1	33	1079	2	uuid:f52f268a-e3f7-44f3-8b7d-037d15eb02bf/household-information[2]	6	2	1	35	1	2		3		2		1	2	1	1	2	2	2	2	0	2	2	2	0	1	1		4	1	1		1	1		2	2
May 16, 2021 7:17:12 PM	uuid:f52f268a-e3f7-44f3-8b7d-037d15eb02bf	11	14	1	Mswelezi	May 10, 2021	1079	1	33	1079	2	uuid:f52f268a-e3f7-44f3-8b7d-037d15eb02bf/household-information[1]	6	1	2	33	2	2		3		1	1	1	2	1	1	2	2	2	2	0	2	2	2	0	1	1		4	1	1		1	1		2	2
May 16, 2021 7:17:12 PM	uuid:f52f268a-e3f7-44f3-8b7d-037d15eb02bf	11	14	1	Mswelezi	May 10, 2021	1079	1	33	1079	2	uuid:f52f268a-e3f7-44f3-8b7d-037d15eb02bf/household-information[6]	6	6	9	15	2	0		0		1	1	1	2	1	1	2	2	2	2	0	2	2	2	0	1	1		4	1	1		1	1		2	2
May 16, 2021 6:57:28 PM	uuid:1412545b-6d11-4f51-a0c3-efa6e21aaa04	7	12	1	Mikuyuni	May 10, 2021	1080	1	30	1080	2	uuid:1412545b-6d11-4f51-a0c3-efa6e21aaa04/household-information[5]	6	5	3	11	1	2		0		1	1	2	0	1	1	2	1	3	1	0	1	3	1	0	1	3		4	4	2		2	2		2	2
May 16, 2021 6:57:28 PM	uuid:1412545b-6d11-4f51-a0c3-efa6e21aaa04	7	12	1	Mikuyuni	May 10, 2021	1080	1	30	1080	2	uuid:1412545b-6d11-4f51-a0c3-efa6e21aaa04/household-information[6]	6	6	3	3	1	0		0		1	1	2	0	1	1	2	1	3	1	0	1	3	1	0	1	3		4	4	2		2	2		2	2
May 16, 2021 6:57:28 PM	uuid:1412545b-6d11-4f51-a0c3-efa6e21aaa04	7	12	1	Mikuyuni	May 10, 2021	1080	1	30	1080	2	uuid:1412545b-6d11-4f51-a0c3-efa6e21aaa04/household-information[1]	6	1	2	30	2	0		3		1	1	2	0	1	1	2	1	3	1	0	1	3	1	0	1	3		4	4	2		2	2		2	2
May 16, 2021 6:57:28 PM	uuid:1412545b-6d11-4f51-a0c3-efa6e21aaa04	7	12	1	Mikuyuni	May 10, 2021	1080	1	30	1080	2	uuid:1412545b-6d11-4f51-a0c3-efa6e21aaa04/household-information[2]	6	2	1	45	1	2		5		2		2	0	1	1	2	1	3	1	0	1	3	1	0	1	3		4	4	2		2	2		2	2
May 16, 2021 6:57:28 PM	uuid:1412545b-6d11-4f51-a0c3-efa6e21aaa04	7	12	1	Mikuyuni	May 10, 2021	1080	1	30	1080	2	uuid:1412545b-6d11-4f51-a0c3-efa6e21aaa04/household-information[4]	6	4	3	13	2	2		0		1	1	2	0	1	1	2	1	3	1	0	1	3	1	0	1	3		4	4	2		2	2		2	2
May 16, 2021 6:57:28 PM	uuid:1412545b-6d11-4f51-a0c3-efa6e21aaa04	7	12	1	Mikuyuni	May 10, 2021	1080	1	30	1080	2	uuid:1412545b-6d11-4f51-a0c3-efa6e21aaa04/household-information[3]	6	3	3	17	2	2		0		1	1	2	0	1	1	2	1	3	1	0	1	3	1	0	1	3		4	4	2		2	2		2	2
May 16, 2021 7:17:16 PM	uuid:d8879f24-a112-4a6c-93b4-88ed84ea7ec0	11	14	1	Tobora	May 12, 2021	1081	1	37	1081	1	uuid:d8879f24-a112-4a6c-93b4-88ed84ea7ec0/household-information[1]	4	1	1	37	1	0		3		1	1	2	0	1	1	2	0	2	2	1	0	2	2	1	1	3		4	2	2		1	2		2	2
May 16, 2021 7:17:16 PM	uuid:d8879f24-a112-4a6c-93b4-88ed84ea7ec0	11	14	1	Tobora	May 12, 2021	1081	1	37	1081	1	uuid:d8879f24-a112-4a6c-93b4-88ed84ea7ec0/household-information[3]	4	3	3	12	2	2		0		1	1	2	0	1	1	2	0	2	2	1	0	2	2	1	1	3		4	2	2		1	2		2	2
May 16, 2021 7:17:16 PM	uuid:d8879f24-a112-4a6c-93b4-88ed84ea7ec0	11	14	1	Tobora	May 12, 2021	1081	1	37	1081	1	uuid:d8879f24-a112-4a6c-93b4-88ed84ea7ec0/household-information[4]	4	4	3	9	2	2		0		1	1	2	0	1	1	2	0	2	2	1	0	2	2	1	1	3		4	2	2		1	2		2	2
May 16, 2021 7:17:16 PM	uuid:d8879f24-a112-4a6c-93b4-88ed84ea7ec0	11	14	1	Tobora	May 12, 2021	1081	1	37	1081	1	uuid:d8879f24-a112-4a6c-93b4-88ed84ea7ec0/household-information[2]	4	2	2	32	2	2		3		1	1	2	0	1	1	2	0	2	2	1	0	2	2	1	1	3		4	2	2		1	2		2	2
May 16, 2021 7:14:35 PM	uuid:f68cc5ec-d8c5-46d1-8419-c684ee383717	12	15	1	Tobora	May 11, 2021	1082	1	25	1082	1	uuid:f68cc5ec-d8c5-46d1-8419-c684ee383717/household-information[1]	1	1	1	25	1	2		6	Motorcyclist	1	1	1	3	1	1	2	0	0	1	0	0	0	1	0	1	3		4	2	2		1	3		2	2
May 16, 2021 7:14:28 PM	uuid:454558c8-4190-4769-b601-e3bd41574ceb	12	15	1	Mswelezi	May 10, 2021	1083	1	67	1083	1	uuid:454558c8-4190-4769-b601-e3bd41574ceb/household-information[3]	3	3	3	19	1	2		3		1	1	1	0	1	1	2	0	0	3	0	0	0	2	0	1	3		1	2	2		2	2		2	2
May 16, 2021 7:14:28 PM	uuid:454558c8-4190-4769-b601-e3bd41574ceb	12	15	1	Mswelezi	May 10, 2021	1083	1	67	1083	1	uuid:454558c8-4190-4769-b601-e3bd41574ceb/household-information[1]	3	1	1	67	1	0		3		2		1	0	1	1	2	0	0	3	0	0	0	2	0	1	3		1	2	2		2	2		2	2
May 16, 2021 7:14:28 PM	uuid:454558c8-4190-4769-b601-e3bd41574ceb	12	15	1	Mswelezi	May 10, 2021	1083	1	67	1083	1	uuid:454558c8-4190-4769-b601-e3bd41574ceb/household-information[2]	3	2	2	60	2	2		3		1	1	1	0	1	1	2	0	0	3	0	0	0	2	0	1	3		1	2	2		2	2		2	2
May 16, 2021 7:05:55 PM	uuid:d97184b9-e09a-408e-8f98-5b4668312f8a	3	16	1	Tobora	May 11, 2021	1084	1	74	1084	3	uuid:d97184b9-e09a-408e-8f98-5b4668312f8a/household-information[1]	3	1	1	32	2	2		3		1	1	1	2	1	1	2	0	2	1	0	0	2	1	0	1	3		4	1	3		1	2		2	2
May 16, 2021 7:05:55 PM	uuid:d97184b9-e09a-408e-8f98-5b4668312f8a	3	16	1	Tobora	May 11, 2021	1084	1	74	1084	3	uuid:d97184b9-e09a-408e-8f98-5b4668312f8a/household-information[2]	3	2	3	12	2	2		0		1	1	1	2	1	1	2	0	2	1	0	0	2	1	0	1	3		4	1	3		1	2		2	2
May 16, 2021 7:05:55 PM	uuid:d97184b9-e09a-408e-8f98-5b4668312f8a	3	16	1	Tobora	May 11, 2021	1084	1	74	1084	3	uuid:d97184b9-e09a-408e-8f98-5b4668312f8a/household-information[3]	3	3	3	9	2	2		0		1	1	1	2	1	1	2	0	2	1	0	0	2	1	0	1	3		4	1	3		1	2		2	2
May 16, 2021 7:14:29 PM	uuid:6d57eca1-a5df-432c-aa9f-8509ab2fd3fa	12	15	1	Mswelezi	May 10, 2021	1085	1	25	1085	2	uuid:6d57eca1-a5df-432c-aa9f-8509ab2fd3fa/household-information[4]	5	4	3	7	1	1		0		1	1	1	2	1	1	2	1	2	2	0	1	2	2	0	1	3		4	2	2		2	2		2	2
May 16, 2021 7:14:29 PM	uuid:6d57eca1-a5df-432c-aa9f-8509ab2fd3fa	12	15	1	Mswelezi	May 10, 2021	1085	1	25	1085	2	uuid:6d57eca1-a5df-432c-aa9f-8509ab2fd3fa/household-information[3]	5	3	3	10	2	2		0		1	1	1	2	1	1	2	1	2	2	0	1	2	2	0	1	3		4	2	2		2	2		2	2
May 16, 2021 7:14:29 PM	uuid:6d57eca1-a5df-432c-aa9f-8509ab2fd3fa	12	15	1	Mswelezi	May 10, 2021	1085	1	25	1085	2	uuid:6d57eca1-a5df-432c-aa9f-8509ab2fd3fa/household-information[5]	5	5	3	2	1	0		0		1	1	1	2	1	1	2	1	2	2	0	1	2	2	0	1	3		4	2	2		2	2		2	2
May 16, 2021 7:14:29 PM	uuid:6d57eca1-a5df-432c-aa9f-8509ab2fd3fa	12	15	1	Mswelezi	May 10, 2021	1085	1	25	1085	2	uuid:6d57eca1-a5df-432c-aa9f-8509ab2fd3fa/household-information[1]	5	1	1	30	1	2		3		1	1	1	2	1	1	2	1	2	2	0	1	2	2	0	1	3		4	2	2		2	2		2	2
May 16, 2021 7:14:30 PM	uuid:0aebdc5d-bddc-4187-82ab-9b09f6a6a8b6	12	15	1	Mswelezi	May 10, 2021	1086	1	35	1086	1	uuid:0aebdc5d-bddc-4187-82ab-9b09f6a6a8b6/household-information[4]	6	4	3	9	2	2		0		1	1	2	0	1	1	2	1	3	2	0	1	3	2	0	1	1		4	1	1		1	2		2	2
May 16, 2021 7:14:30 PM	uuid:0aebdc5d-bddc-4187-82ab-9b09f6a6a8b6	12	15	1	Mswelezi	May 10, 2021	1086	1	35	1086	1	uuid:0aebdc5d-bddc-4187-82ab-9b09f6a6a8b6/household-information[6]	6	6	3	2	1	0		0		1	1	2	0	1	1	2	1	3	2	0	1	3	2	0	1	1		4	1	1		1	2		2	2
May 16, 2021 7:14:30 PM	uuid:0aebdc5d-bddc-4187-82ab-9b09f6a6a8b6	12	15	1	Mswelezi	May 10, 2021	1086	1	35	1086	1	uuid:0aebdc5d-bddc-4187-82ab-9b09f6a6a8b6/household-information[3]	6	3	3	11	1	2		0		1	1	2	0	1	1	2	1	3	2	0	1	3	2	0	1	1		4	1	1		1	2		2	2
May 16, 2021 7:14:30 PM	uuid:0aebdc5d-bddc-4187-82ab-9b09f6a6a8b6	12	15	1	Mswelezi	May 10, 2021	1086	1	35	1086	1	uuid:0aebdc5d-bddc-4187-82ab-9b09f6a6a8b6/household-information[1]	6	1	1	35	1	0		3		1	1	2	0	1	1	2	1	3	2	0	1	3	2	0	1	1		4	1	1		1	2		2	2
May 16, 2021 7:14:30 PM	uuid:0aebdc5d-bddc-4187-82ab-9b09f6a6a8b6	12	15	1	Mswelezi	May 10, 2021	1086	1	35	1086	1	uuid:0aebdc5d-bddc-4187-82ab-9b09f6a6a8b6/household-information[2]	6	2	2	26	2	0		3		1	1	2	0	1	1	2	1	3	2	0	1	3	2	0	1	1		4	1	1		1	2		2	2
May 16, 2021 7:14:30 PM	uuid:0aebdc5d-bddc-4187-82ab-9b09f6a6a8b6	12	15	1	Mswelezi	May 10, 2021	1086	1	35	1086	1	uuid:0aebdc5d-bddc-4187-82ab-9b09f6a6a8b6/household-information[5]	6	5	3	6	2	0		0		1	1	2	0	1	1	2	1	3	2	0	1	3	2	0	1	1		4	1	1		1	2		2	2
May 16, 2021 7:14:31 PM	uuid:d1888af6-a81d-4b64-971d-11da62b03f3a	12	15	1	Mswelezi	May 10, 2021	1087	1	20	1087	1	uuid:d1888af6-a81d-4b64-971d-11da62b03f3a/household-information[1]	1	1	1	20	1	2		3		1	2	1	2	1	1	2	0	0	1	0	0	0	1	0	1	1		4	1	2		1	3		2	2
May 16, 2021 7:05:37 PM	uuid:fde9bd9d-ffeb-43be-bb28-8f564ff5c03c	3	16	1	Mswelezi	May 10, 2021	1089	1	89	1089	3	uuid:fde9bd9d-ffeb-43be-bb28-8f564ff5c03c/household-information[3]	6	3	3	18	2	3		0		1	1	1	2	1	1	2	0	3	3	0	0	3	3	0	1	3		6	2	5	Net	2	2		2	2
May 16, 2021 7:05:37 PM	uuid:fde9bd9d-ffeb-43be-bb28-8f564ff5c03c	3	16	1	Mswelezi	May 10, 2021	1089	1	89	1089	3	uuid:fde9bd9d-ffeb-43be-bb28-8f564ff5c03c/household-information[2]	6	2	11	89	2	0		3		1	1	1	2	1	1	2	0	3	3	0	0	3	3	0	1	3		6	2	5	Net	2	2		2	2
May 16, 2021 7:05:37 PM	uuid:fde9bd9d-ffeb-43be-bb28-8f564ff5c03c	3	16	1	Mswelezi	May 10, 2021	1089	1	89	1089	3	uuid:fde9bd9d-ffeb-43be-bb28-8f564ff5c03c/household-information[5]	6	5	3	12	2	2		0		1	1	1	2	1	1	2	0	3	3	0	0	3	3	0	1	3		6	2	5	Net	2	2		2	2
May 16, 2021 7:05:37 PM	uuid:fde9bd9d-ffeb-43be-bb28-8f564ff5c03c	3	16	1	Mswelezi	May 10, 2021	1089	1	89	1089	3	uuid:fde9bd9d-ffeb-43be-bb28-8f564ff5c03c/household-information[4]	6	4	3	13	1	2		0		1	1	1	2	1	1	2	0	3	3	0	0	3	3	0	1	3		6	2	5	Net	2	2		2	2
May 16, 2021 7:05:37 PM	uuid:fde9bd9d-ffeb-43be-bb28-8f564ff5c03c	3	16	1	Mswelezi	May 10, 2021	1089	1	89	1089	3	uuid:fde9bd9d-ffeb-43be-bb28-8f564ff5c03c/household-information[6]	6	6	3	8	2	2		0		1	1	1	2	1	1	2	0	3	3	0	0	3	3	0	1	3		6	2	5	Net	2	2		2	2
May 16, 2021 7:05:45 PM	uuid:7c3cea34-7ffe-46c2-95f7-230c373b6929	9	13	1	Mikuyuni	May 10, 2021	1091	1	43	1091	2	uuid:7c3cea34-7ffe-46c2-95f7-230c373b6929/household-information[1]	5	1	1	60	1	2		3		1	1	1	2	1	1	2	0	1	3	0	0	1	3	0	1	3		3	3	5	Processed wood	4	5	Processed wood	2	2
May 16, 2021 7:05:45 PM	uuid:7c3cea34-7ffe-46c2-95f7-230c373b6929	9	13	1	Mikuyuni	May 10, 2021	1091	1	43	1091	2	uuid:7c3cea34-7ffe-46c2-95f7-230c373b6929/household-information[2]	5	2	2	43	2	2		3		1	1	1	2	1	1	2	0	1	3	0	0	1	3	0	1	3		3	3	5	Processed wood	4	5	Processed wood	2	2
May 16, 2021 7:05:45 PM	uuid:7c3cea34-7ffe-46c2-95f7-230c373b6929	9	13	1	Mikuyuni	May 10, 2021	1091	1	43	1091	2	uuid:7c3cea34-7ffe-46c2-95f7-230c373b6929/household-information[3]	5	3	3	25	1	2		3		2		1	2	1	1	2	0	1	3	0	0	1	3	0	1	3		3	3	5	Processed wood	4	5	Processed wood	2	2
May 16, 2021 7:05:45 PM	uuid:7c3cea34-7ffe-46c2-95f7-230c373b6929	9	13	1	Mikuyuni	May 10, 2021	1091	1	43	1091	2	uuid:7c3cea34-7ffe-46c2-95f7-230c373b6929/household-information[4]	5	4	3	23	2	2		3		1	1	1	2	1	1	2	0	1	3	0	0	1	3	0	1	3		3	3	5	Processed wood	4	5	Processed wood	2	2
May 16, 2021 7:05:45 PM	uuid:7c3cea34-7ffe-46c2-95f7-230c373b6929	9	13	1	Mikuyuni	May 10, 2021	1091	1	43	1091	2	uuid:7c3cea34-7ffe-46c2-95f7-230c373b6929/household-information[5]	5	5	3	13	1	2		6	student	1	1	1	2	1	1	2	0	1	3	0	0	1	3	0	1	3		3	3	5	Processed wood	4	5	Processed wood	2	2
May 16, 2021 7:05:47 PM	uuid:7875887b-2d50-4347-aeab-734882177fb6	10	13	1	Mikuyuni	May 10, 2021	1092	1	30	1092	1	uuid:7875887b-2d50-4347-aeab-734882177fb6/household-information[1]	3	1	1	30	2	2		3		1	1	1	2	1	1	2	1	1	1	0	1	1	1	0	1	3		4	1	5	steel bar	1	5	Processed wood	2	2
May 16, 2021 7:05:47 PM	uuid:7875887b-2d50-4347-aeab-734882177fb6	10	13	1	Mikuyuni	May 10, 2021	1092	1	30	1092	1	uuid:7875887b-2d50-4347-aeab-734882177fb6/household-information[2]	3	2	3	10	2	2		6	student	1	1	1	2	1	1	2	1	1	1	0	1	1	1	0	1	3		4	1	5	steel bar	1	5	Processed wood	2	2
May 16, 2021 7:01:05 PM	uuid:3bbcdcc4-ed05-4bf4-a5b0-1d2b96f145e3	5	11	1	Tobora	May 11, 2021	1093	1	70	1093	2	uuid:3bbcdcc4-ed05-4bf4-a5b0-1d2b96f145e3/household-information[2]	5	2	2	70	2	0		3		1	2	1	2	1	1	2	0	1	4	0	0	0	0	0	1	3		4	1	1		2	2		2	2
May 16, 2021 7:01:05 PM	uuid:3bbcdcc4-ed05-4bf4-a5b0-1d2b96f145e3	5	11	1	Tobora	May 11, 2021	1093	1	70	1093	2	uuid:3bbcdcc4-ed05-4bf4-a5b0-1d2b96f145e3/household-information[5]	5	5	6	6	1	2		0		1	2	1	2	1	1	2	0	1	4	0	0	0	0	0	1	3		4	1	1		2	2		2	2
May 16, 2021 7:01:05 PM	uuid:3bbcdcc4-ed05-4bf4-a5b0-1d2b96f145e3	5	11	1	Tobora	May 11, 2021	1093	1	70	1093	2	uuid:3bbcdcc4-ed05-4bf4-a5b0-1d2b96f145e3/household-information[4]	5	4	3	35	1	2		3		1	2	1	2	1	1	2	0	1	4	0	0	0	0	0	1	3		4	1	1		2	2		2	2
May 16, 2021 7:01:05 PM	uuid:3bbcdcc4-ed05-4bf4-a5b0-1d2b96f145e3	5	11	1	Tobora	May 11, 2021	1093	1	70	1093	2	uuid:3bbcdcc4-ed05-4bf4-a5b0-1d2b96f145e3/household-information[3]	5	3	4	68	2	0		3		1	2	1	2	1	1	2	0	1	4	0	0	0	0	0	1	3		4	1	1		2	2		2	2
May 16, 2021 7:01:05 PM	uuid:3bbcdcc4-ed05-4bf4-a5b0-1d2b96f145e3	5	11	1	Tobora	May 11, 2021	1093	1	70	1093	2	uuid:3bbcdcc4-ed05-4bf4-a5b0-1d2b96f145e3/household-information[1]	5	1	1	71	1	2		3		1	2	1	2	1	1	2	0	1	4	0	0	0	0	0	1	3		4	1	1		2	2		2	2
May 16, 2021 7:13:47 PM	uuid:4f43b05e-e393-4697-b288-434a3235e8de	16	17	1	Mswelezi	May 10, 2021	1096	1	47	1096	1	uuid:4f43b05e-e393-4697-b288-434a3235e8de/household-information[3]	6	3	3	16	1	2		3		1	2	1	2	1	1	2	0	4	2	0	0	0	2	0	1	3		6	2	2		1	2		2	2
May 16, 2021 7:13:47 PM	uuid:4f43b05e-e393-4697-b288-434a3235e8de	16	17	1	Mswelezi	May 10, 2021	1096	1	47	1096	1	uuid:4f43b05e-e393-4697-b288-434a3235e8de/household-information[6]	6	6	3	8	1	2		0		1	2	1	2	1	1	2	0	4	2	0	0	0	2	0	1	3		6	2	2		1	2		2	2
May 16, 2021 7:13:47 PM	uuid:4f43b05e-e393-4697-b288-434a3235e8de	16	17	1	Mswelezi	May 10, 2021	1096	1	47	1096	1	uuid:4f43b05e-e393-4697-b288-434a3235e8de/household-information[4]	6	4	3	11	1	2		0		1	2	1	2	1	1	2	0	4	2	0	0	0	2	0	1	3		6	2	2		1	2		2	2
May 16, 2021 7:13:47 PM	uuid:4f43b05e-e393-4697-b288-434a3235e8de	16	17	1	Mswelezi	May 10, 2021	1096	1	47	1096	1	uuid:4f43b05e-e393-4697-b288-434a3235e8de/household-information[5]	6	5	3	10	1	2		0		1	2	1	2	1	1	2	0	4	2	0	0	0	2	0	1	3		6	2	2		1	2		2	2
May 16, 2021 7:13:47 PM	uuid:4f43b05e-e393-4697-b288-434a3235e8de	16	17	1	Mswelezi	May 10, 2021	1096	1	47	1096	1	uuid:4f43b05e-e393-4697-b288-434a3235e8de/household-information[2]	6	2	2	32	1	2		3		1	1	1	2	1	1	2	0	4	2	0	0	0	2	0	1	3		6	2	2		1	2		2	2
May 16, 2021 7:13:47 PM	uuid:4f43b05e-e393-4697-b288-434a3235e8de	16	17	1	Mswelezi	May 10, 2021	1096	1	47	1096	1	uuid:4f43b05e-e393-4697-b288-434a3235e8de/household-information[1]	6	1	1	47	1	2		3		1	1	1	2	1	1	2	0	4	2	0	0	0	2	0	1	3		6	2	2		1	2		2	2
May 16, 2021 7:13:48 PM	uuid:009c9ab9-7457-4939-8406-2a662f80357f	6	17	1	Mswelezi	May 10, 2021	1097	1	48	1097	2	uuid:009c9ab9-7457-4939-8406-2a662f80357f/household-information[2]	5	2	2	48	2	2		4		1	1	1	2	1	1	2	0	2	3	0	0	2	3	0	1	3		4	8	2		2	2		2	2
May 16, 2021 7:13:48 PM	uuid:009c9ab9-7457-4939-8406-2a662f80357f	6	17	1	Mswelezi	May 10, 2021	1097	1	48	1097	2	uuid:009c9ab9-7457-4939-8406-2a662f80357f/household-information[1]	5	1	1	58	1	2		4		1	1	1	2	1	1	2	0	2	3	0	0	2	3	0	1	3		4	8	2		2	2		2	2
May 16, 2021 7:13:48 PM	uuid:009c9ab9-7457-4939-8406-2a662f80357f	6	17	1	Mswelezi	May 10, 2021	1097	1	48	1097	2	uuid:009c9ab9-7457-4939-8406-2a662f80357f/household-information[3]	5	3	3	22	1	2		3		1	1	1	2	1	1	2	0	2	3	0	0	2	3	0	1	3		4	8	2		2	2		2	2
May 16, 2021 7:13:48 PM	uuid:009c9ab9-7457-4939-8406-2a662f80357f	6	17	1	Mswelezi	May 10, 2021	1097	1	48	1097	2	uuid:009c9ab9-7457-4939-8406-2a662f80357f/household-information[4]	5	4	3	15	1	2		4		1	1	1	2	1	1	2	0	2	3	0	0	2	3	0	1	3		4	8	2		2	2		2	2
May 16, 2021 7:13:48 PM	uuid:009c9ab9-7457-4939-8406-2a662f80357f	6	17	1	Mswelezi	May 10, 2021	1097	1	48	1097	2	uuid:009c9ab9-7457-4939-8406-2a662f80357f/household-information[5]	5	5	3	8	2	2		0		1	1	1	2	1	1	2	0	2	3	0	0	2	3	0	1	3		4	8	2		2	2		2	2
May 16, 2021 7:13:50 PM	uuid:d5fc0517-0043-4d53-ae11-5ed420dae72b	6	17	1	Mswelezi	May 10, 2021	1099	1	29	1099	1	uuid:d5fc0517-0043-4d53-ae11-5ed420dae72b/household-information[1]	1	1	1	29	1	2		3		1	2	1	2	1	1	2	0	0	1	0	0	0	0	0	1	3		6	1	2		1	2		2	2
May 16, 2021 7:17:13 PM	uuid:6837751d-a184-48fd-b8e9-7aea5984a020	11	14	1	Mikuyuni	May 10, 2021	1100	1	66	1100	2	uuid:6837751d-a184-48fd-b8e9-7aea5984a020/household-information[1]	2	1	8	66	2	2		3		1	1	1	2	1	1	2	0	0	2	0	0	0	1	0	1	3		4	4	2		2	2		2	2
May 16, 2021 7:17:14 PM	uuid:dae1369c-23b0-4aa1-9439-a62d86c77f54	4	14	1	Mikuyuni	May 10, 2021	1101	1	29	1101	2	uuid:dae1369c-23b0-4aa1-9439-a62d86c77f54/household-information[3]	4	3	3	9	1	2		0		1	1	1	2	1	1	2	0	2	2	0	0	2	2	0	1	3		4	2	1		2	1		2	2
May 16, 2021 7:17:14 PM	uuid:dae1369c-23b0-4aa1-9439-a62d86c77f54	4	14	1	Mikuyuni	May 10, 2021	1101	1	29	1101	2	uuid:dae1369c-23b0-4aa1-9439-a62d86c77f54/household-information[1]	4	1	2	29	2	2		3		1	1	1	2	1	1	2	0	2	2	0	0	2	2	0	1	3		4	2	1		2	1		2	2
May 16, 2021 7:17:14 PM	uuid:dae1369c-23b0-4aa1-9439-a62d86c77f54	4	14	1	Mikuyuni	May 10, 2021	1101	1	29	1101	2	uuid:dae1369c-23b0-4aa1-9439-a62d86c77f54/household-information[2]	4	2	1	36	1	2		3		1	1	1	2	1	1	2	0	2	2	0	0	2	2	0	1	3		4	2	1		2	1		2	2
May 16, 2021 7:17:15 PM	uuid:ce0656b4-5271-4dbb-a9c3-7e62df6530ac	4	14	1	Mikuyuni	May 10, 2021	1102	1	25	1102	2	uuid:ce0656b4-5271-4dbb-a9c3-7e62df6530ac/household-information[1]	2	1	1	25	2	2		3		1	1	1	2	1	1	2	0	1	1	1	0	1	1	1	1	3		4	3	2		1	2		2	2
May 16, 2021 7:05:50 PM	uuid:336cb599-21a5-4f7d-a596-2515b4e59f43	10	13	1	Tobora	May 12, 2021	1103	1	85	1103	1	uuid:336cb599-21a5-4f7d-a596-2515b4e59f43/household-information[2]	2	2	2	68	2	0		3		1	1	2	0	1	1	2	0	0	2	0	0	0	2	0	1	3		4	2	1		2	5	Processed wood	2	2
May 16, 2021 7:17:17 PM	uuid:806cc8a7-c575-4fcb-a491-8589334eccc9	4	14	1	Tobora	May 12, 2021	1104	1	24	1104	3	uuid:806cc8a7-c575-4fcb-a491-8589334eccc9/household-information[1]	2	1	1	54	2	2		3		1	1	1	2	1	1	2	0	1	1	0	0	1	1	0	1	3		4	3	1		2	1		2	2
May 16, 2021 7:17:17 PM	uuid:806cc8a7-c575-4fcb-a491-8589334eccc9	4	14	1	Tobora	May 12, 2021	1104	1	24	1104	3	uuid:806cc8a7-c575-4fcb-a491-8589334eccc9/household-information[2]	2	2	6	8	2	2		0		1	1	1	2	1	1	2	0	1	1	0	0	1	1	0	1	3		4	3	1		2	1		2	2
May 16, 2021 7:14:36 PM	uuid:e6f12a01-264d-4edc-bb94-061026f669d3	12	15	1	Tobora	May 11, 2021	1105	1	30	1105	2	uuid:e6f12a01-264d-4edc-bb94-061026f669d3/household-information[3]	4	3	3	10	1	2		0		1	1	1	2	1	1	2	0	2	2	0	0	2	2	0	1	1		4	2	2		1	2		2	2
May 16, 2021 7:14:36 PM	uuid:e6f12a01-264d-4edc-bb94-061026f669d3	12	15	1	Tobora	May 11, 2021	1105	1	30	1105	2	uuid:e6f12a01-264d-4edc-bb94-061026f669d3/household-information[1]	4	1	1	40	1	2		3		2		1	2	1	1	2	0	2	2	0	0	2	2	0	1	1		4	2	2		1	2		2	2
May 16, 2021 7:14:36 PM	uuid:e6f12a01-264d-4edc-bb94-061026f669d3	12	15	1	Tobora	May 11, 2021	1105	1	30	1105	2	uuid:e6f12a01-264d-4edc-bb94-061026f669d3/household-information[2]	4	2	2	30	2	0		3		1	1	1	2	1	1	2	0	2	2	0	0	2	2	0	1	1		4	2	2		1	2		2	2
May 16, 2021 7:14:32 PM	uuid:aefa0a54-1eba-4606-8ef2-6dad007d739c	13	15	1	Mikuyuni	May 10, 2021	1106	1	56	1106	2	uuid:aefa0a54-1eba-4606-8ef2-6dad007d739c/household-information[2]	3	2	2	59	2	0		3		2		2	0	1	1	2	0	1	2	0	0	0	0	0	1	3		4	3	2		2	2		2	2
May 16, 2021 7:14:32 PM	uuid:aefa0a54-1eba-4606-8ef2-6dad007d739c	13	15	1	Mikuyuni	May 10, 2021	1106	1	56	1106	2	uuid:aefa0a54-1eba-4606-8ef2-6dad007d739c/household-information[3]	3	3	6	10	1	2		0		1	1	2	0	1	1	2	0	1	2	0	0	0	0	0	1	3		4	3	2		2	2		2	2
May 16, 2021 7:14:33 PM	uuid:ea5e1d92-890d-42a2-95b7-a15d3cbfb6de	13	15	1	Mikuyuni	May 10, 2021	1107	1	21	1107	2	uuid:ea5e1d92-890d-42a2-95b7-a15d3cbfb6de/household-information[3]	3	3	3	1	2	0		0		1	1	1	2	1	1	2	1	0	2	0	1	0	2	0	1	3		4	2	2		1	2		2	1
May 16, 2021 7:14:33 PM	uuid:ea5e1d92-890d-42a2-95b7-a15d3cbfb6de	13	15	1	Mikuyuni	May 10, 2021	1107	1	21	1107	2	uuid:ea5e1d92-890d-42a2-95b7-a15d3cbfb6de/household-information[1]	3	1	1	28	1	2		2		1	1	1	2	1	1	2	1	0	2	0	1	0	2	0	1	3		4	2	2		1	2		2	1
May 16, 2021 7:14:33 PM	uuid:ea5e1d92-890d-42a2-95b7-a15d3cbfb6de	13	15	1	Mikuyuni	May 10, 2021	1107	1	21	1107	2	uuid:ea5e1d92-890d-42a2-95b7-a15d3cbfb6de/household-information[2]	3	2	2	21	2	3		3		1	1	1	2	1	1	2	1	0	2	0	1	0	2	0	1	3		4	2	2		1	2		2	1
May 16, 2021 7:14:34 PM	uuid:fe0cc123-3c80-4ff7-a34c-cbe2a529904c	13	15	1	Mikuyuni	May 10, 2021	1108	1	23	1108	2	uuid:fe0cc123-3c80-4ff7-a34c-cbe2a529904c/household-information[2]	4	2	2	23	2	2		3		1	2	1	2	1	1	2	1	1	2	0	0	0	0	0	1	3		7	2	2		2	2		2	2
May 16, 2021 7:14:34 PM	uuid:fe0cc123-3c80-4ff7-a34c-cbe2a529904c	13	15	1	Mikuyuni	May 10, 2021	1108	1	23	1108	2	uuid:fe0cc123-3c80-4ff7-a34c-cbe2a529904c/household-information[1]	4	1	1	29	1	2		3		1	2	1	2	1	1	2	1	1	2	0	0	0	0	0	1	3		7	2	2		2	2		2	2
May 16, 2021 7:14:34 PM	uuid:fe0cc123-3c80-4ff7-a34c-cbe2a529904c	13	15	1	Mikuyuni	May 10, 2021	1108	1	23	1108	2	uuid:fe0cc123-3c80-4ff7-a34c-cbe2a529904c/household-information[4]	4	4	3	4	1	0		0		1	2	1	2	1	1	2	1	1	2	0	0	0	0	0	1	3		7	2	2		2	2		2	2
May 16, 2021 7:13:55 PM	uuid:383ca6c1-a81c-4075-88e8-d0b7ecc13460	6	17	1	Tobora	May 12, 2021	1110	1	31	1110	2	uuid:383ca6c1-a81c-4075-88e8-d0b7ecc13460/household-information[3]	5	3	3	11	2	2		0		1	1	1	2	1	1	2	1	2	2	0	1	2	2	0	1	5	Tarpaulin	4	1	1		2	1		2	2
May 16, 2021 7:13:55 PM	uuid:383ca6c1-a81c-4075-88e8-d0b7ecc13460	6	17	1	Tobora	May 12, 2021	1110	1	31	1110	2	uuid:383ca6c1-a81c-4075-88e8-d0b7ecc13460/household-information[1]	5	1	1	38	1	2		1		2		1	2	1	1	2	1	2	2	0	1	2	2	0	1	5	Tarpaulin	4	1	1		2	1		2	2
May 16, 2021 7:13:55 PM	uuid:383ca6c1-a81c-4075-88e8-d0b7ecc13460	6	17	1	Tobora	May 12, 2021	1110	1	31	1110	2	uuid:383ca6c1-a81c-4075-88e8-d0b7ecc13460/household-information[5]	5	5	3	3	1	0		0		1	1	1	2	1	1	2	1	2	2	0	1	2	2	0	1	5	Tarpaulin	4	1	1		2	1		2	2
May 16, 2021 7:13:55 PM	uuid:383ca6c1-a81c-4075-88e8-d0b7ecc13460	6	17	1	Tobora	May 12, 2021	1110	1	31	1110	2	uuid:383ca6c1-a81c-4075-88e8-d0b7ecc13460/household-information[4]	5	4	3	8	1	2		0		1	1	1	2	1	1	2	1	2	2	0	1	2	2	0	1	5	Tarpaulin	4	1	1		2	1		2	2
May 16, 2021 7:05:52 PM	uuid:631e476a-94b9-4694-9365-92b3b19ba039	9	13	1	Tobora	May 12, 2021	1111	1	60	1111	1	uuid:631e476a-94b9-4694-9365-92b3b19ba039/household-information[7]	9	7	3	31	1	2		2		2		1	2	4	2	2	0	1	3	0	0	1	3	0	4	5	Wood	0	0			1	5	Processed wood	2	2
May 16, 2021 7:05:52 PM	uuid:631e476a-94b9-4694-9365-92b3b19ba039	9	13	1	Tobora	May 12, 2021	1111	1	60	1111	1	uuid:631e476a-94b9-4694-9365-92b3b19ba039/household-information[5]	9	5	6	21	1	2		2		2		1	2	4	4	2	0	1	3	0	0	1	3	0	4	5	Wood	0	0			1	5	Processed wood	2	2
May 16, 2021 7:05:52 PM	uuid:631e476a-94b9-4694-9365-92b3b19ba039	9	13	1	Tobora	May 12, 2021	1111	1	60	1111	1	uuid:631e476a-94b9-4694-9365-92b3b19ba039/household-information[8]	9	8	6	19	2	2		0		2		1	2	4	3	2	0	1	3	0	0	1	3	0	2	3		4	0			1	5	Processed wood	2	2
May 16, 2021 7:05:52 PM	uuid:631e476a-94b9-4694-9365-92b3b19ba039	9	13	1	Tobora	May 12, 2021	1111	1	60	1111	1	uuid:631e476a-94b9-4694-9365-92b3b19ba039/household-information[6]	9	6	6	10	1	2		6	student	1	1	1	2	4	3	2	0	1	3	0	0	1	3	0	4	5	Wood	0	0			1	5	Processed wood	2	2
May 16, 2021 7:05:52 PM	uuid:631e476a-94b9-4694-9365-92b3b19ba039	9	13	1	Tobora	May 12, 2021	1111	1	60	1111	1	uuid:631e476a-94b9-4694-9365-92b3b19ba039/household-information[3]	9	3	3	38	2	0		3		1	1	1	2	4	3	2	0	1	3	0	0	1	3	0	4	5	Wood	0	0			1	5	Processed wood	2	2
May 16, 2021 7:05:52 PM	uuid:631e476a-94b9-4694-9365-92b3b19ba039	9	13	1	Tobora	May 12, 2021	1111	1	60	1111	1	uuid:631e476a-94b9-4694-9365-92b3b19ba039/household-information[9]	9	9	3	25	1	2		2		2		1	2	4	3	2	0	1	3	0	0	1	3	0	4	5	Wood	0	0			1	5	Processed wood	2	2
May 16, 2021 7:05:52 PM	uuid:631e476a-94b9-4694-9365-92b3b19ba039	9	13	1	Tobora	May 12, 2021	1111	1	60	1111	1	uuid:631e476a-94b9-4694-9365-92b3b19ba039/household-information[1]	9	1	1	60	1	2		3		1	1	1	2	4	3	2	0	1	3	0	0	1	3	0	1	3		4	0			2	5	Processed wood	2	2
May 16, 2021 7:05:52 PM	uuid:631e476a-94b9-4694-9365-92b3b19ba039	9	13	1	Tobora	May 12, 2021	1111	1	60	1111	1	uuid:631e476a-94b9-4694-9365-92b3b19ba039/household-information[4]	9	4	3	24	2	2		3		2		1	2	4	1	2	0	1	3	0	0	1	3	0	4	5	Wood	0	0			1	5	Processed wood	2	2
May 16, 2021 7:05:41 PM	uuid:cf246ae6-e20b-4a82-977a-00244d555e42	3	16	1	Mikuyuni	May 10, 2021	1112	1	50	1112	1	uuid:cf246ae6-e20b-4a82-977a-00244d555e42/household-information[2]	6	2	3	23	2	2		3		1	2	1	2	1	1	2	2	1	3	0	0	0	0	0	1	3		4	4	5	steel bar	2	2		2	2
May 16, 2021 7:05:41 PM	uuid:cf246ae6-e20b-4a82-977a-00244d555e42	3	16	1	Mikuyuni	May 10, 2021	1112	1	50	1112	1	uuid:cf246ae6-e20b-4a82-977a-00244d555e42/household-information[5]	6	5	6	4	2	0		0		1	2	1	2	1	1	2	2	1	3	0	0	0	0	0	1	3		4	4	5	steel bar	2	2		2	2
May 16, 2021 7:05:41 PM	uuid:cf246ae6-e20b-4a82-977a-00244d555e42	3	16	1	Mikuyuni	May 10, 2021	1112	1	50	1112	1	uuid:cf246ae6-e20b-4a82-977a-00244d555e42/household-information[3]	6	3	3	20	2	2		3		1	2	1	2	1	1	2	2	1	3	0	0	0	0	0	1	3		4	4	5	steel bar	2	2		2	2
May 16, 2021 7:05:41 PM	uuid:cf246ae6-e20b-4a82-977a-00244d555e42	3	16	1	Mikuyuni	May 10, 2021	1112	1	50	1112	1	uuid:cf246ae6-e20b-4a82-977a-00244d555e42/household-information[4]	6	4	3	11	1	2		3		1	2	1	2	1	1	2	2	1	3	0	0	0	0	0	1	3		4	4	5	steel bar	2	2		2	2
May 16, 2021 7:05:41 PM	uuid:cf246ae6-e20b-4a82-977a-00244d555e42	3	16	1	Mikuyuni	May 10, 2021	1112	1	50	1112	1	uuid:cf246ae6-e20b-4a82-977a-00244d555e42/household-information[1]	6	1	1	50	2	2		3		1	2	1	2	1	2	2	2	1	3	0	0	0	0	0	1	3		4	4	5	steel bar	2	2		2	2
May 16, 2021 7:05:44 PM	uuid:f510e891-60a1-4212-9ee3-cdb63a9488a2	3	16	1	Mikuyuni	May 10, 2021	1114	1	56	1114	1	uuid:f510e891-60a1-4212-9ee3-cdb63a9488a2/household-information[2]	2	2	9	40	1	2		3		1	1	1	2	1	1	2	0	0	2	0	0	0	2	0	1	3		4	2	1		2	2		2	2
May 16, 2021 7:05:44 PM	uuid:f510e891-60a1-4212-9ee3-cdb63a9488a2	3	16	1	Mikuyuni	May 10, 2021	1114	1	56	1114	1	uuid:f510e891-60a1-4212-9ee3-cdb63a9488a2/household-information[1]	2	1	1	56	1	2		3		1	2	1	2	1	1	2	0	0	2	0	0	0	2	0	1	3		4	2	1		2	2		2	2
May 16, 2021 7:05:45 PM	uuid:7ad27eda-0d1a-4f21-8c64-d2d76472a160	14	16	1	Mikuyuni	May 10, 2021	1115	1	66	1115	1	uuid:7ad27eda-0d1a-4f21-8c64-d2d76472a160/household-information[7]	8	7	3	8	1	2		0		1	1	1	2	1	1	2	1	4	3	0	1	4	3	0	1	3		4	4	3		2	2		2	2
May 16, 2021 7:05:45 PM	uuid:7ad27eda-0d1a-4f21-8c64-d2d76472a160	14	16	1	Mikuyuni	May 10, 2021	1115	1	66	1115	1	uuid:7ad27eda-0d1a-4f21-8c64-d2d76472a160/household-information[5]	8	5	3	11	2	0		0		1	1	1	2	1	1	2	1	4	3	0	1	4	3	0	1	3		4	4	3		2	2		2	2
May 16, 2021 7:05:45 PM	uuid:7ad27eda-0d1a-4f21-8c64-d2d76472a160	14	16	1	Mikuyuni	May 10, 2021	1115	1	66	1115	1	uuid:7ad27eda-0d1a-4f21-8c64-d2d76472a160/household-information[6]	8	6	3	10	2	2		0		1	1	1	2	1	1	2	1	4	3	0	1	4	3	0	1	3		4	4	3		2	2		2	2
May 16, 2021 7:05:45 PM	uuid:7ad27eda-0d1a-4f21-8c64-d2d76472a160	14	16	1	Mikuyuni	May 10, 2021	1115	1	66	1115	1	uuid:7ad27eda-0d1a-4f21-8c64-d2d76472a160/household-information[2]	8	2	2	60	2	1		3		1	1	1	2	1	1	2	1	4	3	0	1	4	3	0	1	3		4	4	3		2	2		2	2
May 16, 2021 7:05:45 PM	uuid:7ad27eda-0d1a-4f21-8c64-d2d76472a160	14	16	1	Mikuyuni	May 10, 2021	1115	1	66	1115	1	uuid:7ad27eda-0d1a-4f21-8c64-d2d76472a160/household-information[8]	8	8	3	3	1	0		0		1	1	1	2	1	1	2	1	4	3	0	1	4	3	0	1	3		4	4	3		2	2		2	2
May 16, 2021 7:05:45 PM	uuid:7ad27eda-0d1a-4f21-8c64-d2d76472a160	14	16	1	Mikuyuni	May 10, 2021	1115	1	66	1115	1	uuid:7ad27eda-0d1a-4f21-8c64-d2d76472a160/household-information[1]	8	1	1	66	1	1		3		1	1	1	2	1	1	2	1	4	3	0	1	4	3	0	1	3		4	4	3		2	2		2	2
May 16, 2021 7:05:45 PM	uuid:7ad27eda-0d1a-4f21-8c64-d2d76472a160	14	16	1	Mikuyuni	May 10, 2021	1115	1	66	1115	1	uuid:7ad27eda-0d1a-4f21-8c64-d2d76472a160/household-information[3]	8	3	3	28	2	2		0		1	1	1	2	1	1	2	1	4	3	0	1	4	3	0	1	3		4	4	3		2	2		2	2
May 16, 2021 7:05:45 PM	uuid:7ad27eda-0d1a-4f21-8c64-d2d76472a160	14	16	1	Mikuyuni	May 10, 2021	1115	1	66	1115	1	uuid:7ad27eda-0d1a-4f21-8c64-d2d76472a160/household-information[4]	8	4	3	17	2	2		0		1	1	1	2	1	1	2	1	4	3	0	1	4	3	0	1	3		4	4	3		2	2		2	2
May 16, 2021 7:05:46 PM	uuid:d677031f-66d0-4b33-b456-5c4200f94f9f	3	16	1	Mikuyuni	May 10, 2021	1116	1	39	1116	1	uuid:d677031f-66d0-4b33-b456-5c4200f94f9f/household-information[4]	4	4	3	9	1	2		0		1	2	1	2	1	1	2	1	1	2	0	1	0	2	0	1	3		4	4	2		2	2		2	2
May 16, 2021 7:05:46 PM	uuid:d677031f-66d0-4b33-b456-5c4200f94f9f	3	16	1	Mikuyuni	May 10, 2021	1116	1	39	1116	1	uuid:d677031f-66d0-4b33-b456-5c4200f94f9f/household-information[2]	4	2	2	30	2	2		3		1	1	1	2	1	1	2	1	1	2	0	1	0	2	0	1	3		4	4	2		2	2		2	2
May 16, 2021 7:05:46 PM	uuid:d677031f-66d0-4b33-b456-5c4200f94f9f	3	16	1	Mikuyuni	May 10, 2021	1116	1	39	1116	1	uuid:d677031f-66d0-4b33-b456-5c4200f94f9f/household-information[3]	4	3	3	4	1	0		0		1	1	1	2	1	1	2	1	1	2	0	1	0	2	0	1	3		4	4	2		2	2		2	2
May 16, 2021 7:05:46 PM	uuid:d677031f-66d0-4b33-b456-5c4200f94f9f	3	16	1	Mikuyuni	May 10, 2021	1116	1	39	1116	1	uuid:d677031f-66d0-4b33-b456-5c4200f94f9f/household-information[1]	4	1	1	39	1	2		3		1	1	1	2	1	1	2	1	1	2	0	1	0	2	0	1	3		4	4	2		2	2		2	2
May 16, 2021 7:17:18 PM	uuid:be128f04-cf9e-456c-acee-16306d282034	11	14	1	Tobora	May 12, 2021	1117	1	24	1117	2	uuid:be128f04-cf9e-456c-acee-16306d282034/household-information[1]	3	1	8	24	2	2		3		1	1	1	3	1	1	2	1	0	2	0	1	0	2	0	1	3		4	2	1		1	2		2	2
May 16, 2021 7:17:18 PM	uuid:be128f04-cf9e-456c-acee-16306d282034	11	14	1	Tobora	May 12, 2021	1117	1	24	1117	2	uuid:be128f04-cf9e-456c-acee-16306d282034/household-information[2]	3	2	1	27	1	3		3		2		1	3	1	1	2	1	0	2	0	1	0	2	0	1	3		4	2	1		1	2		2	2
May 16, 2021 7:13:51 PM	uuid:8a3a1b37-63b6-4adb-908e-4df1af6b3258	16	17	1	Mikuyuni	May 10, 2021	1118	1	38	1118	2	uuid:8a3a1b37-63b6-4adb-908e-4df1af6b3258/household-information[5]	8	5	3	14	2	3		0		1	2	1	2	1	1	2	2	3	3	0	0	0	2	0	1	3		7	8	2		2	2		2	5
May 16, 2021 7:13:51 PM	uuid:8a3a1b37-63b6-4adb-908e-4df1af6b3258	16	17	1	Mikuyuni	May 10, 2021	1118	1	38	1118	2	uuid:8a3a1b37-63b6-4adb-908e-4df1af6b3258/household-information[3]	8	3	3	22	2	2		3		2		1	2	1	1	2	2	3	3	0	0	0	2	0	1	3		7	8	2		2	2		2	5
May 16, 2021 7:13:51 PM	uuid:8a3a1b37-63b6-4adb-908e-4df1af6b3258	16	17	1	Mikuyuni	May 10, 2021	1118	1	38	1118	2	uuid:8a3a1b37-63b6-4adb-908e-4df1af6b3258/household-information[1]	8	1	1	42	1	2		3		1	1	1	2	1	1	2	2	3	3	0	0	0	2	0	1	3		7	8	2		2	2		2	5
May 16, 2021 7:13:51 PM	uuid:8a3a1b37-63b6-4adb-908e-4df1af6b3258	16	17	1	Mikuyuni	May 10, 2021	1118	1	38	1118	2	uuid:8a3a1b37-63b6-4adb-908e-4df1af6b3258/household-information[8]	8	8	6	3	2	0		0		1	2	1	2	1	1	2	2	3	3	0	0	0	2	0	1	3		7	8	2		2	2		2	5
May 16, 2021 7:13:51 PM	uuid:8a3a1b37-63b6-4adb-908e-4df1af6b3258	16	17	1	Mikuyuni	May 10, 2021	1118	1	38	1118	2	uuid:8a3a1b37-63b6-4adb-908e-4df1af6b3258/household-information[6]	8	6	3	10	1	2		0		1	2	1	2	1	1	2	2	3	3	0	0	0	2	0	1	3		7	8	2		2	2		2	5
May 16, 2021 7:13:51 PM	uuid:8a3a1b37-63b6-4adb-908e-4df1af6b3258	16	17	1	Mikuyuni	May 10, 2021	1118	1	38	1118	2	uuid:8a3a1b37-63b6-4adb-908e-4df1af6b3258/household-information[4]	8	4	3	17	1	2		3		1	2	1	2	1	1	2	2	3	3	0	0	0	2	0	1	3		7	8	2		2	2		2	5
May 16, 2021 7:13:51 PM	uuid:8a3a1b37-63b6-4adb-908e-4df1af6b3258	16	17	1	Mikuyuni	May 10, 2021	1118	1	38	1118	2	uuid:8a3a1b37-63b6-4adb-908e-4df1af6b3258/household-information[7]	8	7	3	5	1	1		0		1	2	1	2	1	1	2	2	3	3	0	0	0	2	0	1	3		7	8	2		2	2		2	5
May 16, 2021 7:13:51 PM	uuid:8a3a1b37-63b6-4adb-908e-4df1af6b3258	16	17	1	Mikuyuni	May 10, 2021	1118	1	38	1118	2	uuid:8a3a1b37-63b6-4adb-908e-4df1af6b3258/household-information[2]	8	2	2	38	2	2		3		1	1	1	2	1	1	2	2	3	3	0	0	0	2	0	1	3		7	8	2		2	2		2	5
May 16, 2021 7:13:52 PM	uuid:70cc2f14-f35e-4e5c-bb81-f8c34798897d	6	17	1	Mikuyuni	May 10, 2021	1119	1	60	1119	1	uuid:70cc2f14-f35e-4e5c-bb81-f8c34798897d/household-information[2]	5	2	3	47	2	2		3		1	2	2	0	2	1	2	0	2	3	0	0	0	0	0	1	3		4	4	2		2	2		2	2
May 16, 2021 7:13:52 PM	uuid:70cc2f14-f35e-4e5c-bb81-f8c34798897d	6	17	1	Mikuyuni	May 10, 2021	1119	1	60	1119	1	uuid:70cc2f14-f35e-4e5c-bb81-f8c34798897d/household-information[3]	5	3	6	16	1	3		0		2		2	0	2	2	2	0	2	3	0	0	0	0	0	1	3		4	4	2		2	2		2	2
May 16, 2021 7:13:52 PM	uuid:70cc2f14-f35e-4e5c-bb81-f8c34798897d	6	17	1	Mikuyuni	May 10, 2021	1119	1	60	1119	1	uuid:70cc2f14-f35e-4e5c-bb81-f8c34798897d/household-information[4]	5	4	6	13	1	2		0		1	2	2	0	2	2	2	0	2	3	0	0	0	0	0	1	3		4	4	2		2	2		2	2
May 16, 2021 7:13:52 PM	uuid:70cc2f14-f35e-4e5c-bb81-f8c34798897d	6	17	1	Mikuyuni	May 10, 2021	1119	1	60	1119	1	uuid:70cc2f14-f35e-4e5c-bb81-f8c34798897d/household-information[1]	5	1	1	60	2	0		3		1	2	2	0	2	2	2	0	2	3	0	0	0	0	0	1	3		4	4	2		2	2		2	2
May 16, 2021 7:14:38 PM	uuid:527056cd-8f2e-406a-a9c0-9d1ab6aeb549	12	15	1	Tobora	May 11, 2021	1120	1	36	1120	1	uuid:527056cd-8f2e-406a-a9c0-9d1ab6aeb549/household-information[2]	5	2	2	24	2	2		3		1	1	1	2	1	1	2	1	2	2	0	1	2	2	0	1	3		4	2	0		1	2		2	2
May 16, 2021 7:14:38 PM	uuid:527056cd-8f2e-406a-a9c0-9d1ab6aeb549	12	15	1	Tobora	May 11, 2021	1120	1	36	1120	1	uuid:527056cd-8f2e-406a-a9c0-9d1ab6aeb549/household-information[5]	5	5	3	1	2	0		0		1	1	1	2	1	1	2	1	2	2	0	1	2	2	0	1	3		4	2	0		1	2		2	2
May 16, 2021 7:14:38 PM	uuid:527056cd-8f2e-406a-a9c0-9d1ab6aeb549	12	15	1	Tobora	May 11, 2021	1120	1	36	1120	1	uuid:527056cd-8f2e-406a-a9c0-9d1ab6aeb549/household-information[3]	5	3	2	10	2	2		0		1	1	1	2	1	1	2	1	2	2	0	1	2	2	0	1	3		4	2	0		1	2		2	2
May 16, 2021 7:14:38 PM	uuid:527056cd-8f2e-406a-a9c0-9d1ab6aeb549	12	15	1	Tobora	May 11, 2021	1120	1	36	1120	1	uuid:527056cd-8f2e-406a-a9c0-9d1ab6aeb549/household-information[4]	5	4	3	5	1	0		0		1	1	1	2	1	1	2	1	2	2	0	1	2	2	0	1	3		4	2	0		1	2		2	2
May 16, 2021 6:57:31 PM	uuid:26a35132-0f00-4ccc-8d17-ed6cfc96c102	2	12	1	Tobora	May 11, 2021	1123	1	57	1123	1	uuid:26a35132-0f00-4ccc-8d17-ed6cfc96c102/household-information[1]	5	1	1	57	1	2		3		1	2	1	2	1	1	2	0	1	4	0	0	0	0	0	1	3		4	1	1		1	2		2	2
May 16, 2021 6:57:31 PM	uuid:26a35132-0f00-4ccc-8d17-ed6cfc96c102	2	12	1	Tobora	May 11, 2021	1123	1	57	1123	1	uuid:26a35132-0f00-4ccc-8d17-ed6cfc96c102/household-information[3]	5	3	3	17	1	2		3		1	2	1	2	1	1	2	0	1	4	0	0	0	0	0	1	3		4	1	1		1	2		2	2
May 16, 2021 6:57:31 PM	uuid:26a35132-0f00-4ccc-8d17-ed6cfc96c102	2	12	1	Tobora	May 11, 2021	1123	1	57	1123	1	uuid:26a35132-0f00-4ccc-8d17-ed6cfc96c102/household-information[4]	5	4	9	35	2	2		3		1	2	1	2	1	1	2	0	1	4	0	0	0	0	0	1	3		4	1	1		1	2		2	2
May 16, 2021 6:57:31 PM	uuid:26a35132-0f00-4ccc-8d17-ed6cfc96c102	2	12	1	Tobora	May 11, 2021	1123	1	57	1123	1	uuid:26a35132-0f00-4ccc-8d17-ed6cfc96c102/household-information[2]	5	2	3	42	2	1		3		1	2	1	2	1	1	2	0	1	4	0	0	0	0	0	1	3		4	1	1		1	2		2	2
May 16, 2021 6:57:31 PM	uuid:26a35132-0f00-4ccc-8d17-ed6cfc96c102	2	12	1	Tobora	May 11, 2021	1123	1	57	1123	1	uuid:26a35132-0f00-4ccc-8d17-ed6cfc96c102/household-information[5]	5	5	9	17	1	2		3		1	2	1	2	1	1	2	0	1	4	0	0	0	0	0	1	3		4	1	1		1	2		2	2
May 16, 2021 7:17:19 PM	uuid:2fbea1b2-88a5-442d-b0b5-81e242b042c7	11	14	1	Tobora	May 12, 2021	1124	1	53	1124	2	uuid:2fbea1b2-88a5-442d-b0b5-81e242b042c7/household-information[2]	3	2	1	63	1	2		3		1	1	1	2	1	1	2	0	1	2	0	0	1	2	0	1	3		3	1	1		1	3		2	2
May 16, 2021 7:17:19 PM	uuid:2fbea1b2-88a5-442d-b0b5-81e242b042c7	11	14	1	Tobora	May 12, 2021	1124	1	53	1124	2	uuid:2fbea1b2-88a5-442d-b0b5-81e242b042c7/household-information[1]	3	1	2	53	2	2		3		1	1	1	2	1	1	2	0	1	2	0	0	1	2	0	1	3		3	1	1		1	3		2	2
May 16, 2021 6:57:32 PM	uuid:6713dac5-05a2-4c11-bca4-3cd57da0c6e6	7	12	1	Tobora	May 11, 2021	1127	1	21	1127	2	uuid:6713dac5-05a2-4c11-bca4-3cd57da0c6e6/household-information[3]	3	3	3	2	1	0		0		1	1	1	2	1	1	2	1	0	2	0	1	0	2	0	1	3		4	1	2		1	2		2	2
May 16, 2021 6:57:32 PM	uuid:6713dac5-05a2-4c11-bca4-3cd57da0c6e6	7	12	1	Tobora	May 11, 2021	1127	1	21	1127	2	uuid:6713dac5-05a2-4c11-bca4-3cd57da0c6e6/household-information[1]	3	1	1	25	1	2		3		1	1	1	2	1	1	2	1	0	2	0	1	0	2	0	1	3		4	1	2		1	2		2	2
May 16, 2021 6:57:32 PM	uuid:6713dac5-05a2-4c11-bca4-3cd57da0c6e6	7	12	1	Tobora	May 11, 2021	1127	1	21	1127	2	uuid:6713dac5-05a2-4c11-bca4-3cd57da0c6e6/household-information[2]	3	2	2	21	2	2		3		1	1	1	2	1	1	2	1	0	2	0	1	0	2	0	1	3		4	1	2		1	2		2	2
May 16, 2021 7:05:55 PM	uuid:04413080-fb5e-435f-a1f2-dd1cb8553fd2	10	13	1	Tobora	May 12, 2021	1128	1	36	1128	1	uuid:04413080-fb5e-435f-a1f2-dd1cb8553fd2/household-information[1]	5	1	1	36	1	0		2		1	1	1	0	1	1	2	1	2	2	0	1	2	2	0	1	3		4	4	1		2	5	Processed wood	2	2
May 16, 2021 7:05:55 PM	uuid:04413080-fb5e-435f-a1f2-dd1cb8553fd2	10	13	1	Tobora	May 12, 2021	1128	1	36	1128	1	uuid:04413080-fb5e-435f-a1f2-dd1cb8553fd2/household-information[4]	5	4	3	6	1	0		0		1	1	1	0	1	1	2	1	2	2	0	1	2	2	0	1	3		4	4	1		2	5	Processed wood	2	2
May 16, 2021 7:05:55 PM	uuid:04413080-fb5e-435f-a1f2-dd1cb8553fd2	10	13	1	Tobora	May 12, 2021	1128	1	36	1128	1	uuid:04413080-fb5e-435f-a1f2-dd1cb8553fd2/household-information[2]	5	2	2	25	2	0		3		1	1	1	0	1	1	2	1	2	2	0	1	2	2	0	1	3		4	4	1		2	5	Processed wood	2	2
May 16, 2021 7:05:55 PM	uuid:04413080-fb5e-435f-a1f2-dd1cb8553fd2	10	13	1	Tobora	May 12, 2021	1128	1	36	1128	1	uuid:04413080-fb5e-435f-a1f2-dd1cb8553fd2/household-information[3]	5	3	3	8	2	2		6	student	1	1	1	0	1	1	2	1	2	2	0	1	2	2	0	1	3		4	4	1		2	5	Processed wood	2	2
May 16, 2021 7:05:55 PM	uuid:04413080-fb5e-435f-a1f2-dd1cb8553fd2	10	13	1	Tobora	May 12, 2021	1128	1	36	1128	1	uuid:04413080-fb5e-435f-a1f2-dd1cb8553fd2/household-information[5]	5	5	3	1	1	0		0		1	1	1	0	1	1	2	1	2	2	0	1	2	2	0	1	3		4	4	1		2	5	Processed wood	2	2
May 16, 2021 7:14:39 PM	uuid:a5605c92-75ba-4199-b13f-07180f82c900	12	15	1	Tobora	May 11, 2021	1129	1	36	1129	3	uuid:a5605c92-75ba-4199-b13f-07180f82c900/household-information[2]	3	2	1	37	1	2		2		1	1	1	2	1	1	2	0	0	3	0	0	0	3	0	1	3		4	3	2		2	2		2	5
May 16, 2021 7:14:39 PM	uuid:a5605c92-75ba-4199-b13f-07180f82c900	12	15	1	Tobora	May 11, 2021	1129	1	36	1129	3	uuid:a5605c92-75ba-4199-b13f-07180f82c900/household-information[1]	3	1	2	36	2	2		2		1	1	1	2	1	1	2	0	0	3	0	0	0	3	0	1	3		4	3	2		2	2		2	5
May 16, 2021 7:05:50 PM	uuid:daa502cb-5426-4371-b298-7b9dbbec770c	14	16	1	Tobora	May 11, 2021	1130	1	25	1130	2	uuid:daa502cb-5426-4371-b298-7b9dbbec770c/household-information[2]	2	2	6	2	1	0		0		1	1	1	2	1	1	2	1	0	1	0	1	0	1	0	1	3		4	4	5	Steel bar & net	1	2		1	5
May 16, 2021 7:05:50 PM	uuid:daa502cb-5426-4371-b298-7b9dbbec770c	14	16	1	Tobora	May 11, 2021	1130	1	25	1130	2	uuid:daa502cb-5426-4371-b298-7b9dbbec770c/household-information[1]	2	1	1	25	2	3		2		1	1	1	2	1	1	2	1	0	1	0	1	0	1	0	1	3		4	4	5	Steel bar & net	1	2		1	5
May 16, 2021 7:05:51 PM	uuid:50581b91-d7e4-4d86-9b36-9236cd03babd	3	16	1	Tobora	May 11, 2021	1131	1	29	1131	2	uuid:50581b91-d7e4-4d86-9b36-9236cd03babd/household-information[4]	5	4	3	7	2	2		0		1	1	1	2	1	1	2	0	3	2	0	0	3	2	0	1	3		4	4	3		2	2		2	2
May 16, 2021 7:05:51 PM	uuid:50581b91-d7e4-4d86-9b36-9236cd03babd	3	16	1	Tobora	May 11, 2021	1131	1	29	1131	2	uuid:50581b91-d7e4-4d86-9b36-9236cd03babd/household-information[5]	5	5	3	5	2	0		0		1	1	1	2	1	1	2	0	3	2	0	0	3	2	0	1	3		4	4	3		2	2		2	2
May 16, 2021 7:05:51 PM	uuid:50581b91-d7e4-4d86-9b36-9236cd03babd	3	16	1	Tobora	May 11, 2021	1131	1	29	1131	2	uuid:50581b91-d7e4-4d86-9b36-9236cd03babd/household-information[2]	5	2	1	34	1	2		3		1	1	1	2	1	1	2	0	3	2	0	0	3	2	0	1	3		4	4	3		2	2		2	2
May 16, 2021 7:05:51 PM	uuid:50581b91-d7e4-4d86-9b36-9236cd03babd	3	16	1	Tobora	May 11, 2021	1131	1	29	1131	2	uuid:50581b91-d7e4-4d86-9b36-9236cd03babd/household-information[3]	5	3	3	10	1	2		0		1	1	1	2	1	1	2	0	3	2	0	0	3	2	0	1	3		4	4	3		2	2		2	2
May 16, 2021 7:13:57 PM	uuid:313dff49-58fa-4eeb-826e-63940aaac36f	6	17	1	Tobora	May 12, 2021	1132	1	48	1132	1	uuid:313dff49-58fa-4eeb-826e-63940aaac36f/household-information[1]	5	1	1	48	1	1		3		1	1	2	1	2	2	2	0	3	2	0	0	3	2	0	1	1		4	1	1		1	2		2	2
May 16, 2021 7:13:57 PM	uuid:313dff49-58fa-4eeb-826e-63940aaac36f	6	17	1	Tobora	May 12, 2021	1132	1	48	1132	1	uuid:313dff49-58fa-4eeb-826e-63940aaac36f/household-information[5]	5	5	3	11	1	2		0		1	1	2	1	2	2	2	0	3	2	0	0	3	2	0	1	1		4	1	1		1	2		2	2
May 16, 2021 7:13:57 PM	uuid:313dff49-58fa-4eeb-826e-63940aaac36f	6	17	1	Tobora	May 12, 2021	1132	1	48	1132	1	uuid:313dff49-58fa-4eeb-826e-63940aaac36f/household-information[2]	5	2	2	42	2	1		3		1	1	2	1	2	2	2	0	3	2	0	0	3	2	0	2	1		2	1	4		1	2		2	2
May 16, 2021 7:13:57 PM	uuid:313dff49-58fa-4eeb-826e-63940aaac36f	6	17	1	Tobora	May 12, 2021	1132	1	48	1132	1	uuid:313dff49-58fa-4eeb-826e-63940aaac36f/household-information[4]	5	4	3	13	1	2		0		1	1	2	1	2	1	2	0	3	2	0	0	3	2	0	1	1		4	1	1		1	2		2	2
May 16, 2021 7:13:57 PM	uuid:313dff49-58fa-4eeb-826e-63940aaac36f	6	17	1	Tobora	May 12, 2021	1132	1	48	1132	1	uuid:313dff49-58fa-4eeb-826e-63940aaac36f/household-information[3]	5	3	3	16	1	2		3		1	1	2	1	2	2	2	0	3	2	0	0	3	2	0	1	1		4	1	1		1	2		2	2
May 16, 2021 6:57:34 PM	uuid:d603b525-6da1-4377-92cd-d6cc7ef46cc4	7	12	1	Tobora	May 11, 2021	1133	1	54	1133	1	uuid:d603b525-6da1-4377-92cd-d6cc7ef46cc4/household-information[5]	5	5	3	25	1	0		4		1	2	2	0	1	1	2	0	0	5	0	0	0	0	0	1	3		4	2	2		1	2		2	2
May 16, 2021 6:57:34 PM	uuid:d603b525-6da1-4377-92cd-d6cc7ef46cc4	7	12	1	Tobora	May 11, 2021	1133	1	54	1133	1	uuid:d603b525-6da1-4377-92cd-d6cc7ef46cc4/household-information[4]	5	4	3	31	2	0		4		2		2	0	1	1	2	0	0	5	0	0	0	0	0	1	3		4	2	2		1	2		2	2
May 16, 2021 6:57:34 PM	uuid:d603b525-6da1-4377-92cd-d6cc7ef46cc4	7	12	1	Tobora	May 11, 2021	1133	1	54	1133	1	uuid:d603b525-6da1-4377-92cd-d6cc7ef46cc4/household-information[3]	5	3	3	35	1	0		4		1	2	2	0	1	1	2	0	0	5	0	0	0	0	0	1	3		4	2	2		1	2		2	2
May 16, 2021 6:57:34 PM	uuid:d603b525-6da1-4377-92cd-d6cc7ef46cc4	7	12	1	Tobora	May 11, 2021	1133	1	54	1133	1	uuid:d603b525-6da1-4377-92cd-d6cc7ef46cc4/household-information[2]	5	2	2	45	2	0		4		1	2	2	0	1	1	2	0	0	5	0	0	0	0	0	1	3		4	2	2		1	2		2	2
May 16, 2021 6:57:33 PM	uuid:3d675ea6-a00a-4aec-a314-e6a25f5d391b	2	12	1	Tobora	May 11, 2021	1134	1	41	1134	1	uuid:3d675ea6-a00a-4aec-a314-e6a25f5d391b/household-information[3]	3	3	3	17	2	3		0		2		1	3	1	1	2	0	1	2	0	0	0	0	0	1	3		4	2	2		1	2		2	2
May 16, 2021 6:57:33 PM	uuid:3d675ea6-a00a-4aec-a314-e6a25f5d391b	2	12	1	Tobora	May 11, 2021	1134	1	41	1134	1	uuid:3d675ea6-a00a-4aec-a314-e6a25f5d391b/household-information[2]	3	2	3	25	2	3		3		1	1	1	3	1	1	2	0	1	2	0	0	0	0	0	1	3		4	2	2		1	2		2	2
May 16, 2021 7:01:07 PM	uuid:5b0f5ad9-ebaf-4bb8-bff2-eb5342dd6513	5	11	2	Kibonkho	May 12, 2021	1135	1	36	1135	1	uuid:5b0f5ad9-ebaf-4bb8-bff2-eb5342dd6513/household-information[2]	5	2	3	12	1	2		0		1	1	1	2	1	1	2	0	4	1	0	0	4	1	0	1	3		4	8	2		2	2		2	5
May 16, 2021 7:01:07 PM	uuid:5b0f5ad9-ebaf-4bb8-bff2-eb5342dd6513	5	11	2	Kibonkho	May 12, 2021	1135	1	36	1135	1	uuid:5b0f5ad9-ebaf-4bb8-bff2-eb5342dd6513/household-information[5]	5	5	3	6	1	2		0		1	1	1	2	1	1	2	0	4	1	0	0	4	1	0	1	3		4	8	2		2	2		2	5
May 16, 2021 7:01:07 PM	uuid:5b0f5ad9-ebaf-4bb8-bff2-eb5342dd6513	5	11	2	Kibonkho	May 12, 2021	1135	1	36	1135	1	uuid:5b0f5ad9-ebaf-4bb8-bff2-eb5342dd6513/household-information[4]	5	4	3	6	1	2		0		1	1	1	2	1	1	2	0	4	1	0	0	4	1	0	1	3		4	8	2		2	2		2	5
May 16, 2021 7:01:07 PM	uuid:5b0f5ad9-ebaf-4bb8-bff2-eb5342dd6513	5	11	2	Kibonkho	May 12, 2021	1135	1	36	1135	1	uuid:5b0f5ad9-ebaf-4bb8-bff2-eb5342dd6513/household-information[3]	5	3	3	9	1	2		0		1	1	1	2	1	1	2	0	4	1	0	0	4	1	0	1	3		4	8	2		2	2		2	5
May 16, 2021 7:01:07 PM	uuid:5b0f5ad9-ebaf-4bb8-bff2-eb5342dd6513	5	11	2	Kibonkho	May 12, 2021	1135	1	36	1135	1	uuid:5b0f5ad9-ebaf-4bb8-bff2-eb5342dd6513/household-information[1]	5	1	1	36	1	2		3		1	1	1	2	1	1	2	0	4	1	0	0	4	1	0	1	3		4	8	2		2	2		2	5
May 16, 2021 7:17:20 PM	uuid:9d787d1e-f569-4d57-81e1-7780405f3d56	4	14	1	Tobora	May 12, 2021	1136	1	39	1136	2	uuid:9d787d1e-f569-4d57-81e1-7780405f3d56/household-information[28]	31	28	3	13	1	2		0		1	1	2	0	4	1	2	8	15	8	0	8	15	8	0	1	3		4	5	2		1	2		2	2
May 16, 2021 7:17:20 PM	uuid:9d787d1e-f569-4d57-81e1-7780405f3d56	4	14	1	Tobora	May 12, 2021	1136	1	39	1136	2	uuid:9d787d1e-f569-4d57-81e1-7780405f3d56/household-information[9]	31	9	3	26	1	0		4		1	1	2	0	4	1	2	8	15	8	0	8	15	8	0	1	3		4	5	2		1	2		2	2
May 16, 2021 7:17:20 PM	uuid:9d787d1e-f569-4d57-81e1-7780405f3d56	4	14	1	Tobora	May 12, 2021	1136	1	39	1136	2	uuid:9d787d1e-f569-4d57-81e1-7780405f3d56/household-information[7]	31	7	3	7	1	2		0		1	1	2	0	4	1	2	8	15	8	0	8	15	8	0	1	3		4	5	2		1	2		2	2
May 16, 2021 7:17:20 PM	uuid:9d787d1e-f569-4d57-81e1-7780405f3d56	4	14	1	Tobora	May 12, 2021	1136	1	39	1136	2	uuid:9d787d1e-f569-4d57-81e1-7780405f3d56/household-information[1]	31	1	2	39	2	2		4		1	1	2	0	4	1	2	8	15	8	0	8	15	8	0	1	3		4	5	2		1	2		2	2
May 16, 2021 7:17:20 PM	uuid:9d787d1e-f569-4d57-81e1-7780405f3d56	4	14	1	Tobora	May 12, 2021	1136	1	39	1136	2	uuid:9d787d1e-f569-4d57-81e1-7780405f3d56/household-information[31]	31	31	3	1	2	0		0		1	1	2	0	4	1	2	8	15	8	0	8	15	8	0	1	3		4	5	2		1	2		2	2
May 16, 2021 7:17:20 PM	uuid:9d787d1e-f569-4d57-81e1-7780405f3d56	4	14	1	Tobora	May 12, 2021	1136	1	39	1136	2	uuid:9d787d1e-f569-4d57-81e1-7780405f3d56/household-information[18]	31	18	3	1	1	0		0		1	1	2	0	4	1	2	8	15	8	0	8	15	8	0	1	3		4	5	2		1	2		2	2
May 16, 2021 7:17:20 PM	uuid:9d787d1e-f569-4d57-81e1-7780405f3d56	4	14	1	Tobora	May 12, 2021	1136	1	39	1136	2	uuid:9d787d1e-f569-4d57-81e1-7780405f3d56/household-information[25]	31	25	3	1	2	0		0		1	1	2	0	4	1	2	8	15	8	0	8	15	8	0	1	3		4	5	2		1	2		2	2
May 16, 2021 7:17:20 PM	uuid:9d787d1e-f569-4d57-81e1-7780405f3d56	4	14	1	Tobora	May 12, 2021	1136	1	39	1136	2	uuid:9d787d1e-f569-4d57-81e1-7780405f3d56/household-information[19]	31	19	2	29	2	2		4		1	1	2	0	4	1	2	8	15	8	0	8	15	8	0	1	3		4	5	2		1	2		2	2
May 16, 2021 7:17:20 PM	uuid:9d787d1e-f569-4d57-81e1-7780405f3d56	4	14	1	Tobora	May 12, 2021	1136	1	39	1136	2	uuid:9d787d1e-f569-4d57-81e1-7780405f3d56/household-information[23]	31	23	3	7	2	0		0		1	1	2	0	4	3	2	8	15	8	0	8	15	8	0	1	3		4	5	2		1	2		2	2
May 16, 2021 7:17:20 PM	uuid:9d787d1e-f569-4d57-81e1-7780405f3d56	4	14	1	Tobora	May 12, 2021	1136	1	39	1136	2	uuid:9d787d1e-f569-4d57-81e1-7780405f3d56/household-information[21]	31	21	3	12	2	0		0		1	1	2	0	4	2	2	8	15	8	0	8	15	8	0	3	3		4	5	2		1	2		2	2
May 16, 2021 7:17:20 PM	uuid:9d787d1e-f569-4d57-81e1-7780405f3d56	4	14	1	Tobora	May 12, 2021	1136	1	39	1136	2	uuid:9d787d1e-f569-4d57-81e1-7780405f3d56/household-information[11]	31	11	2	36	2	2		4		1	1	2	0	4	1	2	8	15	8	0	8	15	8	0	1	3		4	5	2		1	2		2	2
May 16, 2021 7:17:20 PM	uuid:9d787d1e-f569-4d57-81e1-7780405f3d56	4	14	1	Tobora	May 12, 2021	1136	1	39	1136	2	uuid:9d787d1e-f569-4d57-81e1-7780405f3d56/household-information[27]	31	27	3	23	1	0		4		1	1	2	0	4	1	2	8	15	8	0	8	15	8	0	4	3		4	5	2		1	2		2	2
May 16, 2021 7:17:20 PM	uuid:9d787d1e-f569-4d57-81e1-7780405f3d56	4	14	1	Tobora	May 12, 2021	1136	1	39	1136	2	uuid:9d787d1e-f569-4d57-81e1-7780405f3d56/household-information[17]	31	17	3	2	1	0		0		1	1	2	0	4	1	2	8	15	8	0	8	15	8	0	1	3		4	5	2		1	2		2	2
May 16, 2021 7:17:20 PM	uuid:9d787d1e-f569-4d57-81e1-7780405f3d56	4	14	1	Tobora	May 12, 2021	1136	1	39	1136	2	uuid:9d787d1e-f569-4d57-81e1-7780405f3d56/household-information[3]	31	3	3	16	1	2		4		1	1	2	0	4	1	2	8	15	8	0	8	15	8	0	2	3		4	5	2		1	2		2	2
May 16, 2021 7:17:20 PM	uuid:9d787d1e-f569-4d57-81e1-7780405f3d56	4	14	1	Tobora	May 12, 2021	1136	1	39	1136	2	uuid:9d787d1e-f569-4d57-81e1-7780405f3d56/household-information[4]	31	4	3	15	2	0		4		1	1	2	0	4	1	2	8	15	8	0	8	15	8	0	1	3		4	5	2		1	2		2	2
May 16, 2021 7:17:20 PM	uuid:9d787d1e-f569-4d57-81e1-7780405f3d56	4	14	1	Tobora	May 12, 2021	1136	1	39	1136	2	uuid:9d787d1e-f569-4d57-81e1-7780405f3d56/household-information[29]	31	29	3	7	2	2		0		1	1	2	0	4	1	2	8	15	8	0	8	15	8	0	1	3		4	5	2		1	2		2	2
May 16, 2021 7:17:20 PM	uuid:9d787d1e-f569-4d57-81e1-7780405f3d56	4	14	1	Tobora	May 12, 2021	1136	1	39	1136	2	uuid:9d787d1e-f569-4d57-81e1-7780405f3d56/household-information[5]	31	5	3	13	1	2		0		1	1	2	0	4	1	2	8	15	8	0	8	15	8	0	1	3		4	5	2		1	2		2	2
May 16, 2021 7:17:20 PM	uuid:9d787d1e-f569-4d57-81e1-7780405f3d56	4	14	1	Tobora	May 12, 2021	1136	1	39	1136	2	uuid:9d787d1e-f569-4d57-81e1-7780405f3d56/household-information[22]	31	22	3	10	2	0		3		1	1	2	0	4	1	2	8	15	8	0	8	15	8	0	1	3		4	5	2		1	2		2	2
May 16, 2021 7:17:20 PM	uuid:9d787d1e-f569-4d57-81e1-7780405f3d56	4	14	1	Tobora	May 12, 2021	1136	1	39	1136	2	uuid:9d787d1e-f569-4d57-81e1-7780405f3d56/household-information[12]	31	12	3	16	1	2		4		1	1	2	0	4	1	2	8	15	8	0	8	15	8	0	1	3		4	5	2		1	2		2	2
May 16, 2021 7:17:20 PM	uuid:9d787d1e-f569-4d57-81e1-7780405f3d56	4	14	1	Tobora	May 12, 2021	1136	1	39	1136	2	uuid:9d787d1e-f569-4d57-81e1-7780405f3d56/household-information[16]	31	16	3	3	1	0		0		1	1	2	0	4	1	2	8	15	8	0	8	15	8	0	1	3		4	5	2		1	2		2	2
May 16, 2021 7:17:20 PM	uuid:9d787d1e-f569-4d57-81e1-7780405f3d56	4	14	1	Tobora	May 12, 2021	1136	1	39	1136	2	uuid:9d787d1e-f569-4d57-81e1-7780405f3d56/household-information[2]	31	2	1	42	1	0		4		2		2	0	4	1	2	8	15	8	0	8	15	8	0	1	3		4	5	2		1	2		2	2
May 16, 2021 7:17:20 PM	uuid:9d787d1e-f569-4d57-81e1-7780405f3d56	4	14	1	Tobora	May 12, 2021	1136	1	39	1136	2	uuid:9d787d1e-f569-4d57-81e1-7780405f3d56/household-information[30]	31	30	3	6	1	1		0		1	1	2	0	4	1	2	8	15	8	0	8	15	8	0	1	3		4	5	2		1	2		2	2
May 16, 2021 7:17:20 PM	uuid:9d787d1e-f569-4d57-81e1-7780405f3d56	4	14	1	Tobora	May 12, 2021	1136	1	39	1136	2	uuid:9d787d1e-f569-4d57-81e1-7780405f3d56/household-information[14]	31	14	3	9	2	2		0		1	1	2	0	4	1	2	8	15	8	0	8	15	8	0	1	3		4	5	2		1	2		2	2
May 16, 2021 7:17:20 PM	uuid:9d787d1e-f569-4d57-81e1-7780405f3d56	4	14	1	Tobora	May 12, 2021	1136	1	39	1136	2	uuid:9d787d1e-f569-4d57-81e1-7780405f3d56/household-information[13]	31	13	3	10	1	2		0		1	1	2	0	4	1	2	8	15	8	0	8	15	8	0	1	3		4	5	2		1	2		2	2
May 16, 2021 7:17:20 PM	uuid:9d787d1e-f569-4d57-81e1-7780405f3d56	4	14	1	Tobora	May 12, 2021	1136	1	39	1136	2	uuid:9d787d1e-f569-4d57-81e1-7780405f3d56/household-information[15]	31	15	3	5	1	0		0		1	1	2	0	4	1	2	8	15	8	0	8	15	8	0	1	3		4	5	2		1	2		2	2
May 16, 2021 7:17:20 PM	uuid:9d787d1e-f569-4d57-81e1-7780405f3d56	4	14	1	Tobora	May 12, 2021	1136	1	39	1136	2	uuid:9d787d1e-f569-4d57-81e1-7780405f3d56/household-information[26]	31	26	2	28	2	2		4		1	1	2	0	4	1	2	8	15	8	0	8	15	8	0	1	3		4	5	2		1	2		2	2
May 16, 2021 7:17:20 PM	uuid:9d787d1e-f569-4d57-81e1-7780405f3d56	4	14	1	Tobora	May 12, 2021	1136	1	39	1136	2	uuid:9d787d1e-f569-4d57-81e1-7780405f3d56/household-information[24]	31	24	3	4	2	0		0		1	1	2	0	4	4	2	8	15	8	0	8	15	8	0	1	3		4	5	2		1	2		2	2
May 16, 2021 7:17:20 PM	uuid:9d787d1e-f569-4d57-81e1-7780405f3d56	4	14	1	Tobora	May 12, 2021	1136	1	39	1136	2	uuid:9d787d1e-f569-4d57-81e1-7780405f3d56/household-information[10]	31	10	3	9	2	2		0		1	1	2	0	4	1	2	8	15	8	0	8	15	8	0	1	3		4	5	2		1	2		2	2
May 16, 2021 7:17:20 PM	uuid:9d787d1e-f569-4d57-81e1-7780405f3d56	4	14	1	Tobora	May 12, 2021	1136	1	39	1136	2	uuid:9d787d1e-f569-4d57-81e1-7780405f3d56/household-information[6]	31	6	3	9	1	0		0		1	1	2	0	4	1	2	8	15	8	0	8	15	8	0	1	3		4	5	2		1	2		2	2
May 16, 2021 7:17:20 PM	uuid:9d787d1e-f569-4d57-81e1-7780405f3d56	4	14	1	Tobora	May 12, 2021	1136	1	39	1136	2	uuid:9d787d1e-f569-4d57-81e1-7780405f3d56/household-information[8]	31	8	3	3	2	0		0		1	1	2	0	4	1	2	8	15	8	0	8	15	8	0	1	3		4	5	2		1	2		2	2
May 16, 2021 7:14:40 PM	uuid:e9cc1604-1c8e-4a27-929b-43240ec32e24	12	15	1	Tobora	May 11, 2021	1137	1	84	1137	1	uuid:e9cc1604-1c8e-4a27-929b-43240ec32e24/household-information[5]	6	5	6	4	2	0		0		1	1	1	2	1	1	2	1	1	4	0	1	1	4	0	1	3		4	5	5	Net	2	2		2	2
May 16, 2021 7:14:40 PM	uuid:e9cc1604-1c8e-4a27-929b-43240ec32e24	12	15	1	Tobora	May 11, 2021	1137	1	84	1137	1	uuid:e9cc1604-1c8e-4a27-929b-43240ec32e24/household-information[4]	6	4	3	19	2	3		0		1	1	1	2	1	1	2	1	1	4	0	1	1	4	0	1	3		4	5	5	Net	2	2		2	2
May 16, 2021 7:14:40 PM	uuid:e9cc1604-1c8e-4a27-929b-43240ec32e24	12	15	1	Tobora	May 11, 2021	1137	1	84	1137	1	uuid:e9cc1604-1c8e-4a27-929b-43240ec32e24/household-information[6]	6	6	6	5	1	0		0		1	1	1	2	1	1	2	1	1	4	0	1	1	4	0	1	3		4	5	5	Net	2	2		2	2
May 16, 2021 7:14:40 PM	uuid:e9cc1604-1c8e-4a27-929b-43240ec32e24	12	15	1	Tobora	May 11, 2021	1137	1	84	1137	1	uuid:e9cc1604-1c8e-4a27-929b-43240ec32e24/household-information[1]	6	1	1	84	1	2		4		1	1	1	2	1	1	2	1	1	4	0	1	1	4	0	1	3		4	5	5	Net	2	2		2	2
May 16, 2021 7:14:40 PM	uuid:e9cc1604-1c8e-4a27-929b-43240ec32e24	12	15	1	Tobora	May 11, 2021	1137	1	84	1137	1	uuid:e9cc1604-1c8e-4a27-929b-43240ec32e24/household-information[2]	6	2	2	67	2	2		4		1	1	1	2	1	1	2	1	1	4	0	1	1	4	0	1	3		4	5	5	Net	2	2		2	2
May 16, 2021 7:05:53 PM	uuid:915f5543-a52d-48b0-8e81-fffb39e8fee8	14	16	1	Tobora	May 11, 2021	1138	1	21	1138	1	uuid:915f5543-a52d-48b0-8e81-fffb39e8fee8/household-information[1]	2	1	1	21	2	2		3		1	1	1	2	1	1	2	1	0	1	1	1	0	1	1	1	3		4	1	5	Net	1	2		2	2
May 16, 2021 7:05:53 PM	uuid:915f5543-a52d-48b0-8e81-fffb39e8fee8	14	16	1	Tobora	May 11, 2021	1138	1	21	1138	1	uuid:915f5543-a52d-48b0-8e81-fffb39e8fee8/household-information[2]	2	2	3	2	1	0		0		1	1	1	2	1	1	2	1	0	1	1	1	0	1	1	1	3		4	1	5	Net	1	2		2	2
May 16, 2021 6:57:35 PM	uuid:2ae6d106-c70f-4b85-b2e1-b10b9fdc13eb	2	12	2	Kibonkho	May 12, 2021	1139	1	40	1139	1	uuid:2ae6d106-c70f-4b85-b2e1-b10b9fdc13eb/household-information[2]	5	2	1	50	1	2		3		2		1	2	1	1	2	0	2	3	0	0	0	0	0	1	3		2	4	1		2	2		2	2
May 16, 2021 6:57:35 PM	uuid:2ae6d106-c70f-4b85-b2e1-b10b9fdc13eb	2	12	2	Kibonkho	May 12, 2021	1139	1	40	1139	1	uuid:2ae6d106-c70f-4b85-b2e1-b10b9fdc13eb/household-information[4]	5	4	3	17	1	3		0		1	2	1	2	1	1	2	0	2	3	0	0	0	0	0	1	3		2	4	1		2	2		2	2
May 16, 2021 6:57:35 PM	uuid:2ae6d106-c70f-4b85-b2e1-b10b9fdc13eb	2	12	2	Kibonkho	May 12, 2021	1139	1	40	1139	1	uuid:2ae6d106-c70f-4b85-b2e1-b10b9fdc13eb/household-information[3]	5	3	3	18	1	0		0		1	2	1	2	1	1	2	0	2	3	0	0	0	0	0	1	3		2	4	1		2	2		2	2
May 16, 2021 6:57:35 PM	uuid:2ae6d106-c70f-4b85-b2e1-b10b9fdc13eb	2	12	2	Kibonkho	May 12, 2021	1139	1	40	1139	1	uuid:2ae6d106-c70f-4b85-b2e1-b10b9fdc13eb/household-information[1]	5	1	2	40	2	2		3		1	2	1	2	1	1	2	0	2	3	0	0	0	0	0	1	3		2	4	1		2	2		2	2
May 16, 2021 7:05:56 PM	uuid:bb415ab6-2176-4cc7-bec9-049105c20a0c	14	16	1	Tobora	May 11, 2021	1140	1	39	1140	2	uuid:bb415ab6-2176-4cc7-bec9-049105c20a0c/household-information[3]	7	3	3	12	1	2		0		1	2	1	2	1	1	2	2	2	3	0	0	0	0	0	1	3		4	2	5	Net	1	2		2	2
May 16, 2021 7:05:56 PM	uuid:bb415ab6-2176-4cc7-bec9-049105c20a0c	14	16	1	Tobora	May 11, 2021	1140	1	39	1140	2	uuid:bb415ab6-2176-4cc7-bec9-049105c20a0c/household-information[5]	7	5	3	17	1	2		4		1	2	1	2	1	1	2	2	2	3	0	0	0	0	0	1	3		4	2	5	Net	1	2		2	2
May 16, 2021 7:05:56 PM	uuid:bb415ab6-2176-4cc7-bec9-049105c20a0c	14	16	1	Tobora	May 11, 2021	1140	1	39	1140	2	uuid:bb415ab6-2176-4cc7-bec9-049105c20a0c/household-information[2]	7	2	2	39	2	0		4		1	2	1	2	1	2	2	2	2	3	0	0	0	0	0	1	3		4	2	5	Net	1	2		2	2
May 16, 2021 7:05:56 PM	uuid:bb415ab6-2176-4cc7-bec9-049105c20a0c	14	16	1	Tobora	May 11, 2021	1140	1	39	1140	2	uuid:bb415ab6-2176-4cc7-bec9-049105c20a0c/household-information[4]	7	4	3	19	2	2		0		1	2	1	2	1	3	2	2	2	3	0	0	0	0	0	1	3		4	2	5	Net	1	2		2	2
May 16, 2021 7:05:56 PM	uuid:bb415ab6-2176-4cc7-bec9-049105c20a0c	14	16	1	Tobora	May 11, 2021	1140	1	39	1140	2	uuid:bb415ab6-2176-4cc7-bec9-049105c20a0c/household-information[7]	7	7	3	4	1	0		0		1	2	1	2	1	1	2	2	2	3	0	0	0	0	0	1	3		4	2	5	Net	1	2		2	2
May 16, 2021 7:05:56 PM	uuid:bb415ab6-2176-4cc7-bec9-049105c20a0c	14	16	1	Tobora	May 11, 2021	1140	1	39	1140	2	uuid:bb415ab6-2176-4cc7-bec9-049105c20a0c/household-information[1]	7	1	1	59	1	2		4		1	2	1	2	1	1	2	2	2	3	0	0	0	0	0	1	3		4	2	5	Net	1	2		2	2
May 16, 2021 7:05:57 PM	uuid:936024c4-6d17-4771-a424-590bc7a525dd	9	13	2	Kibonkho	May 12, 2021	1141	1	33	1141	1	uuid:936024c4-6d17-4771-a424-590bc7a525dd/household-information[5]	10	5	4	26	2	2		6	Technician	1	1	1	2	1	1	2	2	2	6	0	2	2	6	0	1	3		4	6	5	steel bar	2	5	Processed wood	2	6
May 16, 2021 7:05:57 PM	uuid:936024c4-6d17-4771-a424-590bc7a525dd	9	13	2	Kibonkho	May 12, 2021	1141	1	33	1141	1	uuid:936024c4-6d17-4771-a424-590bc7a525dd/household-information[8]	10	8	3	3	1	0		0		1	1	1	2	1	1	2	2	2	6	0	2	2	6	0	1	3		4	6	5	steel bar	2	5	Processed wood	2	6
May 16, 2021 7:05:57 PM	uuid:936024c4-6d17-4771-a424-590bc7a525dd	9	13	2	Kibonkho	May 12, 2021	1141	1	33	1141	1	uuid:936024c4-6d17-4771-a424-590bc7a525dd/household-information[1]	10	1	2	35	1	2		3		1	1	1	2	1	1	2	2	2	6	0	2	2	6	0	1	3		4	6	5	steel bar	2	5	Processed wood	2	6
May 16, 2021 7:05:57 PM	uuid:936024c4-6d17-4771-a424-590bc7a525dd	9	13	2	Kibonkho	May 12, 2021	1141	1	33	1141	1	uuid:936024c4-6d17-4771-a424-590bc7a525dd/household-information[9]	10	9	7	31	1	2		6	construction worker	1	1	1	2	1	1	2	2	2	6	0	2	2	6	0	1	3		4	6	5	steel bar	2	5	Processed wood	2	6
May 16, 2021 7:05:57 PM	uuid:936024c4-6d17-4771-a424-590bc7a525dd	9	13	2	Kibonkho	May 12, 2021	1141	1	33	1141	1	uuid:936024c4-6d17-4771-a424-590bc7a525dd/household-information[4]	10	4	3	3	1	0		0		1	1	1	2	1	1	2	2	2	6	0	2	2	6	0	1	3		4	6	5	steel bar	2	5	Processed wood	2	6
May 16, 2021 7:05:57 PM	uuid:936024c4-6d17-4771-a424-590bc7a525dd	9	13	2	Kibonkho	May 12, 2021	1141	1	33	1141	1	uuid:936024c4-6d17-4771-a424-590bc7a525dd/household-information[7]	10	7	3	7	1	2		6	student	1	1	1	2	1	1	2	2	2	6	0	2	2	6	0	1	3		4	6	5	steel bar	2	5	Processed wood	2	6
May 16, 2021 7:05:57 PM	uuid:936024c4-6d17-4771-a424-590bc7a525dd	9	13	2	Kibonkho	May 12, 2021	1141	1	33	1141	1	uuid:936024c4-6d17-4771-a424-590bc7a525dd/household-information[6]	10	6	4	17	2	3		0		1	1	1	2	1	1	2	2	2	6	0	2	2	6	0	1	3		4	6	5	steel bar	2	5	Processed wood	2	6
May 16, 2021 7:05:57 PM	uuid:936024c4-6d17-4771-a424-590bc7a525dd	9	13	2	Kibonkho	May 12, 2021	1141	1	33	1141	1	uuid:936024c4-6d17-4771-a424-590bc7a525dd/household-information[10]	10	10	9	31	1	3		1		1	1	1	2	1	1	2	2	2	6	0	2	2	6	0	1	3		4	6	5	steel bar	2	5	Processed wood	2	6
May 16, 2021 7:05:57 PM	uuid:936024c4-6d17-4771-a424-590bc7a525dd	9	13	2	Kibonkho	May 12, 2021	1141	1	33	1141	1	uuid:936024c4-6d17-4771-a424-590bc7a525dd/household-information[3]	10	3	3	10	2	2		6	student	1	1	1	2	1	1	2	2	2	6	0	2	2	6	0	1	3		4	6	5	steel bar	2	5	Processed wood	2	6
May 16, 2021 7:17:23 PM	uuid:f2a9a76c-585e-409d-be69-fd2a51769e1b	11	14	2	Kibonkho	May 12, 2021	1142	1	40	1142	1	uuid:f2a9a76c-585e-409d-be69-fd2a51769e1b/household-information[3]	5	3	3	12	1	2		0		1	1	1	3	1	1	2	0	3	2	0	0	3	2	0	1	3		4	2	1		2	2		2	2
May 16, 2021 7:17:23 PM	uuid:f2a9a76c-585e-409d-be69-fd2a51769e1b	11	14	2	Kibonkho	May 12, 2021	1142	1	40	1142	1	uuid:f2a9a76c-585e-409d-be69-fd2a51769e1b/household-information[4]	5	4	3	9	1	2		0		1	1	1	3	1	1	2	0	3	2	0	0	3	2	0	1	3		4	2	1		2	2		2	2
May 16, 2021 7:17:23 PM	uuid:f2a9a76c-585e-409d-be69-fd2a51769e1b	11	14	2	Kibonkho	May 12, 2021	1142	1	40	1142	1	uuid:f2a9a76c-585e-409d-be69-fd2a51769e1b/household-information[2]	5	2	2	20	2	2		3		1	1	1	3	1	1	2	0	3	2	0	0	3	2	0	1	3		4	2	1		2	2		2	2
May 16, 2021 7:17:23 PM	uuid:f2a9a76c-585e-409d-be69-fd2a51769e1b	11	14	2	Kibonkho	May 12, 2021	1142	1	40	1142	1	uuid:f2a9a76c-585e-409d-be69-fd2a51769e1b/household-information[5]	5	5	3	7	1	2		0		1	1	1	3	1	1	2	0	3	2	0	0	3	2	0	1	3		4	2	1		2	2		2	2
May 16, 2021 7:17:23 PM	uuid:f2a9a76c-585e-409d-be69-fd2a51769e1b	11	14	2	Kibonkho	May 12, 2021	1142	1	40	1142	1	uuid:f2a9a76c-585e-409d-be69-fd2a51769e1b/household-information[1]	5	1	1	40	1	3		0		1	1	1	3	1	1	2	0	3	2	0	0	3	2	0	1	3		4	2	1		2	2		2	2
May 16, 2021 7:05:58 PM	uuid:ff65d1c9-2b6a-426c-bae4-df8c03eaa7a8	3	16	2	Kibonkho	May 12, 2021	1143	1	23	1143	1	uuid:ff65d1c9-2b6a-426c-bae4-df8c03eaa7a8/household-information[1]	3	1	1	23	1	2		3		1	1	1	2	1	1	2	1	0	2	0	0	0	2	0	1	3		4	1	5	Net	1	3		2	2
May 16, 2021 7:05:58 PM	uuid:ff65d1c9-2b6a-426c-bae4-df8c03eaa7a8	3	16	2	Kibonkho	May 12, 2021	1143	1	23	1143	1	uuid:ff65d1c9-2b6a-426c-bae4-df8c03eaa7a8/household-information[3]	3	3	3	1	1	0		0		1	1	1	2	1	1	2	1	0	2	0	0	0	2	0	1	3		4	1	5	Net	1	3		2	2
May 16, 2021 7:05:54 PM	uuid:fda684bd-d08d-4655-9c5e-3efe2c9e2b1e	3	16	1	Tobora	May 11, 2021	1144	1	21	1144	2	uuid:fda684bd-d08d-4655-9c5e-3efe2c9e2b1e/household-information[1]	2	1	1	25	1	2		3		1	1	1	2	1	1	2	0	0	2	0	0	0	2	0	1	3		4	2	5	Net	1	2		2	2
May 16, 2021 7:05:54 PM	uuid:fda684bd-d08d-4655-9c5e-3efe2c9e2b1e	3	16	1	Tobora	May 11, 2021	1144	1	21	1144	2	uuid:fda684bd-d08d-4655-9c5e-3efe2c9e2b1e/household-information[2]	2	2	2	21	2	2		3		1	1	1	2	1	1	2	0	0	2	0	0	0	2	0	1	3		4	2	5	Net	1	2		2	2
May 16, 2021 7:14:42 PM	uuid:2f3c02c7-f296-48ab-bc61-55cb50db441b	12	15	2	Kibonkho	May 12, 2021	1145	1	20	1145	1	uuid:2f3c02c7-f296-48ab-bc61-55cb50db441b/household-information[1]	2	1	1	20	1	3		2		1	1	1	3	1	1	2	0	1	1	0	0	0	1	0	1	2		1	1	2		1	2		2	2
May 16, 2021 7:14:42 PM	uuid:2f3c02c7-f296-48ab-bc61-55cb50db441b	12	15	2	Kibonkho	May 12, 2021	1145	1	20	1145	1	uuid:2f3c02c7-f296-48ab-bc61-55cb50db441b/household-information[2]	2	2	2	17	2	2		3		2		1	3	1	1	2	0	1	1	0	0	0	1	0	1	2		1	1	2		1	2		2	2
May 16, 2021 7:13:58 PM	uuid:1f01e1cd-4fa8-4ca8-9d2a-983c1a2718a3	16	17	2	Kibonkho	May 12, 2021	1146	1	72	1146	3	uuid:1f01e1cd-4fa8-4ca8-9d2a-983c1a2718a3/household-information[3]	7	3	8	72	2	0		3		1	2	1	2	1	1	2	1	3	3	0	0	1	1	0	1	3		3	5	1		1	2		2	2
May 16, 2021 7:13:58 PM	uuid:1f01e1cd-4fa8-4ca8-9d2a-983c1a2718a3	16	17	2	Kibonkho	May 12, 2021	1146	1	72	1146	3	uuid:1f01e1cd-4fa8-4ca8-9d2a-983c1a2718a3/household-information[5]	7	5	3	6	1	0		0		2		1	2	1	1	2	1	3	3	0	0	1	1	0	1	3		3	5	1		1	2		2	2
May 16, 2021 7:13:58 PM	uuid:1f01e1cd-4fa8-4ca8-9d2a-983c1a2718a3	16	17	2	Kibonkho	May 12, 2021	1146	1	72	1146	3	uuid:1f01e1cd-4fa8-4ca8-9d2a-983c1a2718a3/household-information[7]	7	7	3	6	1	0		0		1	1	1	2	1	1	2	1	3	3	0	0	1	1	0	1	3		3	5	1		1	2		2	2
May 16, 2021 7:13:58 PM	uuid:1f01e1cd-4fa8-4ca8-9d2a-983c1a2718a3	16	17	2	Kibonkho	May 12, 2021	1146	1	72	1146	3	uuid:1f01e1cd-4fa8-4ca8-9d2a-983c1a2718a3/household-information[1]	7	1	1	29	1	2		2		1	1	1	2	1	1	2	1	3	3	0	0	1	1	0	1	3		3	5	1		1	2		2	2
May 16, 2021 7:13:58 PM	uuid:1f01e1cd-4fa8-4ca8-9d2a-983c1a2718a3	16	17	2	Kibonkho	May 12, 2021	1146	1	72	1146	3	uuid:1f01e1cd-4fa8-4ca8-9d2a-983c1a2718a3/household-information[6]	7	6	3	1	1	0		0		2		1	2	1	1	2	1	3	3	0	0	1	1	0	1	3		3	5	1		1	2		2	2
May 16, 2021 7:13:58 PM	uuid:1f01e1cd-4fa8-4ca8-9d2a-983c1a2718a3	16	17	2	Kibonkho	May 12, 2021	1146	1	72	1146	3	uuid:1f01e1cd-4fa8-4ca8-9d2a-983c1a2718a3/household-information[4]	7	4	4	43	2	2		2		2		1	2	1	1	2	1	3	3	0	0	1	1	0	1	3		3	5	1		1	2		2	2
May 16, 2021 7:13:58 PM	uuid:1f01e1cd-4fa8-4ca8-9d2a-983c1a2718a3	16	17	2	Kibonkho	May 12, 2021	1146	1	72	1146	3	uuid:1f01e1cd-4fa8-4ca8-9d2a-983c1a2718a3/household-information[2]	7	2	2	23	2	2		0		1	1	1	2	1	1	2	1	3	3	0	0	1	1	0	1	3		3	5	1		1	2		2	2
May 16, 2021 7:17:25 PM	uuid:f5858ec6-5911-404a-8ee8-eb13a6fe3d69	4	14	2	Kibonkho	May 12, 2021	1149	1	61	1149	2	uuid:f5858ec6-5911-404a-8ee8-eb13a6fe3d69/household-information[3]	15	3	3	23	1	2		0		1	1	1	3	1	1	2	3	7	5	0	3	7	4	0	1	3		2	11	2		2	2		1	5
May 16, 2021 7:17:25 PM	uuid:f5858ec6-5911-404a-8ee8-eb13a6fe3d69	4	14	2	Kibonkho	May 12, 2021	1149	1	61	1149	2	uuid:f5858ec6-5911-404a-8ee8-eb13a6fe3d69/household-information[8]	15	8	6	8	1	2		0		1	1	1	3	1	1	2	3	7	5	0	3	7	4	0	1	3		2	11	2		2	2		1	5
May 16, 2021 7:17:25 PM	uuid:f5858ec6-5911-404a-8ee8-eb13a6fe3d69	4	14	2	Kibonkho	May 12, 2021	1149	1	61	1149	2	uuid:f5858ec6-5911-404a-8ee8-eb13a6fe3d69/household-information[7]	15	7	6	8	2	2		0		1	1	1	3	1	1	2	3	7	5	0	3	7	4	0	1	3		2	11	2		2	2		1	5
May 16, 2021 7:17:25 PM	uuid:f5858ec6-5911-404a-8ee8-eb13a6fe3d69	4	14	2	Kibonkho	May 12, 2021	1149	1	61	1149	2	uuid:f5858ec6-5911-404a-8ee8-eb13a6fe3d69/household-information[9]	15	9	6	7	1	2		0		1	1	1	3	1	1	2	3	7	5	0	3	7	4	0	1	3		2	11	2		2	2		1	5
May 16, 2021 7:17:25 PM	uuid:f5858ec6-5911-404a-8ee8-eb13a6fe3d69	4	14	2	Kibonkho	May 12, 2021	1149	1	61	1149	2	uuid:f5858ec6-5911-404a-8ee8-eb13a6fe3d69/household-information[1]	15	1	2	61	2	2		3		1	1	1	3	1	1	2	3	7	5	0	3	7	4	0	1	3		2	11	2		2	2		1	5
May 16, 2021 7:17:25 PM	uuid:f5858ec6-5911-404a-8ee8-eb13a6fe3d69	4	14	2	Kibonkho	May 12, 2021	1149	1	61	1149	2	uuid:f5858ec6-5911-404a-8ee8-eb13a6fe3d69/household-information[6]	15	6	6	16	2	3		0		1	1	1	3	1	1	2	3	7	5	0	3	7	4	0	1	3		2	11	2		2	2		1	5
May 16, 2021 7:17:25 PM	uuid:f5858ec6-5911-404a-8ee8-eb13a6fe3d69	4	14	2	Kibonkho	May 12, 2021	1149	1	61	1149	2	uuid:f5858ec6-5911-404a-8ee8-eb13a6fe3d69/household-information[14]	15	14	6	28	2	2		3		2		1	3	1	1	2	3	7	5	0	3	7	4	0	1	3		2	11	2		2	2		1	5
May 16, 2021 7:17:25 PM	uuid:f5858ec6-5911-404a-8ee8-eb13a6fe3d69	4	14	2	Kibonkho	May 12, 2021	1149	1	61	1149	2	uuid:f5858ec6-5911-404a-8ee8-eb13a6fe3d69/household-information[11]	15	11	6	3	2	0		0		1	1	1	3	1	1	2	3	7	5	0	3	7	4	0	1	3		2	11	2		2	2		1	5
May 16, 2021 7:17:25 PM	uuid:f5858ec6-5911-404a-8ee8-eb13a6fe3d69	4	14	2	Kibonkho	May 12, 2021	1149	1	61	1149	2	uuid:f5858ec6-5911-404a-8ee8-eb13a6fe3d69/household-information[10]	15	10	6	4	2	0		0		1	1	1	3	1	1	2	3	7	5	0	3	7	4	0	1	3		2	11	2		2	2		1	5
May 16, 2021 7:17:25 PM	uuid:f5858ec6-5911-404a-8ee8-eb13a6fe3d69	4	14	2	Kibonkho	May 12, 2021	1149	1	61	1149	2	uuid:f5858ec6-5911-404a-8ee8-eb13a6fe3d69/household-information[4]	15	4	3	23	2	2		3		1	1	1	3	1	1	2	3	7	5	0	3	7	4	0	1	3		2	11	2		2	2		1	5
May 16, 2021 7:17:25 PM	uuid:f5858ec6-5911-404a-8ee8-eb13a6fe3d69	4	14	2	Kibonkho	May 12, 2021	1149	1	61	1149	2	uuid:f5858ec6-5911-404a-8ee8-eb13a6fe3d69/household-information[13]	15	13	6	18	1	3		0		2		1	3	1	1	2	3	7	5	0	3	7	4	0	1	3		2	11	2		2	2		1	5
May 16, 2021 7:17:25 PM	uuid:f5858ec6-5911-404a-8ee8-eb13a6fe3d69	4	14	2	Kibonkho	May 12, 2021	1149	1	61	1149	2	uuid:f5858ec6-5911-404a-8ee8-eb13a6fe3d69/household-information[5]	15	5	3	21	2	3		3		2		1	3	1	1	2	3	7	5	0	3	7	4	0	1	3		2	11	2		2	2		1	5
May 16, 2021 7:17:25 PM	uuid:f5858ec6-5911-404a-8ee8-eb13a6fe3d69	4	14	2	Kibonkho	May 12, 2021	1149	1	61	1149	2	uuid:f5858ec6-5911-404a-8ee8-eb13a6fe3d69/household-information[12]	15	12	6	1	1	0		0		1	1	1	3	1	1	2	3	7	5	0	3	7	4	0	1	3		2	11	2		2	2		1	5
May 16, 2021 7:17:25 PM	uuid:f5858ec6-5911-404a-8ee8-eb13a6fe3d69	4	14	2	Kibonkho	May 12, 2021	1149	1	61	1149	2	uuid:f5858ec6-5911-404a-8ee8-eb13a6fe3d69/household-information[2]	15	2	1	70	1	3		3		1	1	1	3	1	1	2	3	7	5	0	3	7	4	0	1	3		2	11	2		2	2		1	5
May 16, 2021 7:17:25 PM	uuid:f5858ec6-5911-404a-8ee8-eb13a6fe3d69	4	14	2	Kibonkho	May 12, 2021	1149	1	61	1149	2	uuid:f5858ec6-5911-404a-8ee8-eb13a6fe3d69/household-information[15]	15	15	6	10	1	2		0		2		1	3	1	1	2	3	7	5	0	3	7	4	0	1	3		2	11	2		2	2		1	5
May 16, 2021 7:01:09 PM	uuid:8f7bce4f-db65-47d7-b82c-a5657f96437b	5	11	2	Kibonkho	May 12, 2021	1150	1	44	1150	1	uuid:8f7bce4f-db65-47d7-b82c-a5657f96437b/household-information[3]	5	3	3	18	1	3		6	Traditional doctor	1	1	1	2	1	1	2	2	0	3	0	2	0	3	0	1	3		4	4	2		1	2		2	6
May 16, 2021 7:01:09 PM	uuid:8f7bce4f-db65-47d7-b82c-a5657f96437b	5	11	2	Kibonkho	May 12, 2021	1150	1	44	1150	1	uuid:8f7bce4f-db65-47d7-b82c-a5657f96437b/household-information[1]	5	1	1	44	2	2		3		1	1	1	2	1	1	2	2	0	3	0	2	0	3	0	1	3		4	4	2		1	2		2	6
May 16, 2021 7:01:09 PM	uuid:8f7bce4f-db65-47d7-b82c-a5657f96437b	5	11	2	Kibonkho	May 12, 2021	1150	1	44	1150	1	uuid:8f7bce4f-db65-47d7-b82c-a5657f96437b/household-information[2]	5	2	3	24	2	2		2		1	1	1	2	1	1	2	2	0	3	0	2	0	3	0	1	3		4	4	2		1	2		2	6
May 16, 2021 7:01:09 PM	uuid:8f7bce4f-db65-47d7-b82c-a5657f96437b	5	11	2	Kibonkho	May 12, 2021	1150	1	44	1150	1	uuid:8f7bce4f-db65-47d7-b82c-a5657f96437b/household-information[5]	5	5	6	4	1	0		0		1	1	1	2	1	1	2	2	0	3	0	2	0	3	0	1	3		4	4	2		1	2		2	6
May 16, 2021 7:05:59 PM	uuid:be3c2d91-67f9-4533-827c-24db6bc027e6	14	16	2	Kibonkho	May 12, 2021	1151	1	21	1151	2	uuid:be3c2d91-67f9-4533-827c-24db6bc027e6/household-information[2]	2	2	2	21	2	2		3		1	1	1	2	1	1	2	0	0	2	0	0	0	2	0	1	3		3	1	5	Net	1	3		2	2
May 16, 2021 7:14:43 PM	uuid:d4aa85e6-7dae-4638-b8b6-039244391cd4	12	15	2	Kibonkho	May 12, 2021	1152	1	69	1152	1	uuid:d4aa85e6-7dae-4638-b8b6-039244391cd4/household-information[1]	2	1	1	69	1	2		3		1	2	1	2	1	1	2	0	0	2	0	0	0	0	0	1	3		1	1	1		1	3		2	2
May 16, 2021 7:13:59 PM	uuid:a5bce7b8-c1b4-4b54-a834-3a23598a64d8	6	17	2	Kibonkho	May 12, 2021	1153	1	70	1153	2	uuid:a5bce7b8-c1b4-4b54-a834-3a23598a64d8/household-information[3]	3	3	6	9	2	2		0		1	2	2	0	1	1	2	0	1	2	0	0	0	2	0	1	3		2	2	2		1	2		2	2
May 16, 2021 7:13:59 PM	uuid:a5bce7b8-c1b4-4b54-a834-3a23598a64d8	6	17	2	Kibonkho	May 12, 2021	1153	1	70	1153	2	uuid:a5bce7b8-c1b4-4b54-a834-3a23598a64d8/household-information[1]	3	1	1	73	1	0		3		1	1	2	0	1	1	2	0	1	2	0	0	0	2	0	1	3		2	2	2		1	2		2	2
May 16, 2021 6:57:36 PM	uuid:d8a5fbba-6921-49d7-935a-9ebdbf28acba	2	12	2	Kibonkho	May 12, 2021	1154	1	38	1154	1	uuid:d8a5fbba-6921-49d7-935a-9ebdbf28acba/household-information[1]	2	1	1	38	1	2		3		1	1	1	2	1	1	2	0	0	2	0	0	0	2	0	1	3		4	5	2		2	2		2	2
May 16, 2021 7:05:59 PM	uuid:740c8ae1-9504-4874-a8f3-bcf02da762c0	9	13	2	Kibonkho	May 12, 2021	1155	1	26	1155	1	uuid:740c8ae1-9504-4874-a8f3-bcf02da762c0/household-information[3]	3	3	3	15	2	3		6	student	1	1	1	2	1	1	2	0	1	2	0	0	1	2	0	1	3		4	2	1		1	5	Processed wood	2	6
May 16, 2021 7:05:59 PM	uuid:740c8ae1-9504-4874-a8f3-bcf02da762c0	9	13	2	Kibonkho	May 12, 2021	1155	1	26	1155	1	uuid:740c8ae1-9504-4874-a8f3-bcf02da762c0/household-information[2]	3	2	4	34	2	2		2		1	1	1	2	1	1	2	0	1	2	0	0	1	2	0	1	3		4	2	1		1	5	Processed wood	2	6
May 16, 2021 7:05:59 PM	uuid:740c8ae1-9504-4874-a8f3-bcf02da762c0	9	13	2	Kibonkho	May 12, 2021	1155	1	26	1155	1	uuid:740c8ae1-9504-4874-a8f3-bcf02da762c0/household-information[1]	3	1	1	26	2	2		2		1	2	1	2	1	1	2	0	1	2	0	0	1	2	0	1	3		4	2	1		1	5	Processed wood	2	6
May 16, 2021 7:17:27 PM	uuid:303ab1d1-0bab-4924-a8e0-1ff7ae87cf80	11	14	2	Kibonkho	May 12, 2021	1156	1	33	1156	2	uuid:303ab1d1-0bab-4924-a8e0-1ff7ae87cf80/household-information[3]	7	3	3	18	1	3		3		1	1	1	2	1	1	2	0	4	3	0	0	4	3	0	1	3		3	1	1		2	2		2	2
May 16, 2021 7:17:27 PM	uuid:303ab1d1-0bab-4924-a8e0-1ff7ae87cf80	11	14	2	Kibonkho	May 12, 2021	1156	1	33	1156	2	uuid:303ab1d1-0bab-4924-a8e0-1ff7ae87cf80/household-information[6]	7	6	3	9	1	2		0		1	1	1	2	1	1	2	0	4	3	0	0	4	3	0	1	3		3	1	1		2	2		2	2
May 16, 2021 7:17:27 PM	uuid:303ab1d1-0bab-4924-a8e0-1ff7ae87cf80	11	14	2	Kibonkho	May 12, 2021	1156	1	33	1156	2	uuid:303ab1d1-0bab-4924-a8e0-1ff7ae87cf80/household-information[1]	7	1	2	33	2	2		2		1	1	1	2	1	1	2	0	4	3	0	0	4	3	0	1	3		3	1	1		2	2		2	2
May 16, 2021 7:17:27 PM	uuid:303ab1d1-0bab-4924-a8e0-1ff7ae87cf80	11	14	2	Kibonkho	May 12, 2021	1156	1	33	1156	2	uuid:303ab1d1-0bab-4924-a8e0-1ff7ae87cf80/household-information[4]	7	4	3	14	2	3		0		1	1	1	2	1	1	2	0	4	3	0	0	4	3	0	1	3		3	1	1		2	2		2	2
May 16, 2021 7:17:27 PM	uuid:303ab1d1-0bab-4924-a8e0-1ff7ae87cf80	11	14	2	Kibonkho	May 12, 2021	1156	1	33	1156	2	uuid:303ab1d1-0bab-4924-a8e0-1ff7ae87cf80/household-information[5]	7	5	3	13	2	2		0		1	1	1	2	1	1	2	0	4	3	0	0	4	3	0	1	3		3	1	1		2	2		2	2
May 16, 2021 7:17:27 PM	uuid:303ab1d1-0bab-4924-a8e0-1ff7ae87cf80	11	14	2	Kibonkho	May 12, 2021	1156	1	33	1156	2	uuid:303ab1d1-0bab-4924-a8e0-1ff7ae87cf80/household-information[2]	7	2	1	41	1	2		3		1	1	1	2	1	1	2	0	4	3	0	0	4	3	0	1	3		3	1	1		2	2		2	2
May 16, 2021 7:17:27 PM	uuid:303ab1d1-0bab-4924-a8e0-1ff7ae87cf80	11	14	2	Kibonkho	May 12, 2021	1156	1	33	1156	2	uuid:303ab1d1-0bab-4924-a8e0-1ff7ae87cf80/household-information[7]	7	7	3	8	2	2		0		1	1	1	2	1	1	2	0	4	3	0	0	4	3	0	1	3		3	1	1		2	2		2	2
May 16, 2021 7:01:09 PM	uuid:b69a61c3-874d-4b59-bfb5-c88efed1ea32	5	11	2	Kibonkho	May 12, 2021	1157	1	73	1157	1	uuid:b69a61c3-874d-4b59-bfb5-c88efed1ea32/household-information[2]	3	2	6	10	1	2		0		1	2	2	0	1	1	2	0	2	1	0	0	0	0	0	1	3		2	1	0		1	2		2	2
May 16, 2021 7:01:09 PM	uuid:b69a61c3-874d-4b59-bfb5-c88efed1ea32	5	11	2	Kibonkho	May 12, 2021	1157	1	73	1157	1	uuid:b69a61c3-874d-4b59-bfb5-c88efed1ea32/household-information[3]	3	3	6	7	1	0		0		1	2	2	0	1	1	2	0	2	1	0	0	0	0	0	1	3		2	1	0		1	2		2	2
May 16, 2021 7:01:09 PM	uuid:b69a61c3-874d-4b59-bfb5-c88efed1ea32	5	11	2	Kibonkho	May 12, 2021	1157	1	73	1157	1	uuid:b69a61c3-874d-4b59-bfb5-c88efed1ea32/household-information[1]	3	1	1	73	2	0		3		1	2	2	0	1	1	2	0	2	1	0	0	0	0	0	1	3		2	1	0		1	2		2	2
May 16, 2021 7:14:44 PM	uuid:c7a53fd0-791a-4430-a5c2-14d3f44b8e14	12	15	2	Kibonkho	May 12, 2021	1159	1	29	1159	2	uuid:c7a53fd0-791a-4430-a5c2-14d3f44b8e14/household-information[3]	4	3	3	13	2	2		0		1	1	1	2	1	1	2	0	2	2	0	0	2	2	0	1	3		4	2	5	Net	2	2		2	2
May 16, 2021 7:14:44 PM	uuid:c7a53fd0-791a-4430-a5c2-14d3f44b8e14	12	15	2	Kibonkho	May 12, 2021	1159	1	29	1159	2	uuid:c7a53fd0-791a-4430-a5c2-14d3f44b8e14/household-information[4]	4	4	3	6	2	0		0		1	1	1	2	1	1	2	0	2	2	0	0	2	2	0	1	3		4	2	5	Net	2	2		2	2
May 16, 2021 7:14:44 PM	uuid:c7a53fd0-791a-4430-a5c2-14d3f44b8e14	12	15	2	Kibonkho	May 12, 2021	1159	1	29	1159	2	uuid:c7a53fd0-791a-4430-a5c2-14d3f44b8e14/household-information[1]	4	1	1	33	1	2		2		1	1	1	2	1	1	2	0	2	2	0	0	2	2	0	1	3		4	2	5	Net	2	2		2	2
May 16, 2021 7:14:44 PM	uuid:c7a53fd0-791a-4430-a5c2-14d3f44b8e14	12	15	2	Kibonkho	May 12, 2021	1159	1	29	1159	2	uuid:c7a53fd0-791a-4430-a5c2-14d3f44b8e14/household-information[2]	4	2	2	29	2	2		2		1	1	1	2	1	1	2	0	2	2	0	0	2	2	0	1	3		4	2	5	Net	2	2		2	2
May 16, 2021 7:14:00 PM	uuid:4680b104-b577-4527-804a-6dfb2a1b1360	16	17	2	Kibonkho	May 12, 2021	1160	1	23	1160	1	uuid:4680b104-b577-4527-804a-6dfb2a1b1360/household-information[3]	6	3	5	6	1	1		0		1	2	1	2	1	1	2	0	2	4	0	0	0	1	0	1	3		1	4	2		2	2		2	2
May 16, 2021 7:14:00 PM	uuid:4680b104-b577-4527-804a-6dfb2a1b1360	16	17	2	Kibonkho	May 12, 2021	1160	1	23	1160	1	uuid:4680b104-b577-4527-804a-6dfb2a1b1360/household-information[2]	6	2	4	30	2	2		3		1	1	1	2	1	1	2	0	2	4	0	0	0	1	0	1	3		1	4	2		2	2		2	2
May 16, 2021 7:14:00 PM	uuid:4680b104-b577-4527-804a-6dfb2a1b1360	16	17	2	Kibonkho	May 12, 2021	1160	1	23	1160	1	uuid:4680b104-b577-4527-804a-6dfb2a1b1360/household-information[1]	6	1	1	23	1	2		6	Security	2		1	2	1	1	2	0	2	4	0	0	0	1	0	1	3		1	4	2		2	2		2	2
May 16, 2021 7:14:00 PM	uuid:4680b104-b577-4527-804a-6dfb2a1b1360	16	17	2	Kibonkho	May 12, 2021	1160	1	23	1160	1	uuid:4680b104-b577-4527-804a-6dfb2a1b1360/household-information[6]	6	6	9	42	1	2		3		1	2	1	2	1	1	2	0	2	4	0	0	0	1	0	1	3		1	4	2		2	2		2	2
May 16, 2021 7:14:00 PM	uuid:4680b104-b577-4527-804a-6dfb2a1b1360	16	17	2	Kibonkho	May 12, 2021	1160	1	23	1160	1	uuid:4680b104-b577-4527-804a-6dfb2a1b1360/household-information[5]	6	5	5	18	1	3		0		1	2	1	2	1	1	2	0	2	4	0	0	0	1	0	1	3		1	4	2		2	2		2	2
May 16, 2021 7:14:00 PM	uuid:4680b104-b577-4527-804a-6dfb2a1b1360	16	17	2	Kibonkho	May 12, 2021	1160	1	23	1160	1	uuid:4680b104-b577-4527-804a-6dfb2a1b1360/household-information[4]	6	4	5	12	2	2		0		1	2	1	2	1	1	2	0	2	4	0	0	0	1	0	1	3		1	4	2		2	2		2	2
May 16, 2021 6:57:37 PM	uuid:0c7abdd2-f3d3-4498-8f9a-de3b39046a7c	7	12	2	Kibonkho	May 12, 2021	1161	1	27	1161	2	uuid:0c7abdd2-f3d3-4498-8f9a-de3b39046a7c/household-information[3]	3	3	3	2	2	0		0		1	1	1	2	1	1	2	1	0	2	0	1	0	2	0	1	3		4	2	2		1	2		2	2
May 16, 2021 6:57:37 PM	uuid:0c7abdd2-f3d3-4498-8f9a-de3b39046a7c	7	12	2	Kibonkho	May 12, 2021	1161	1	27	1161	2	uuid:0c7abdd2-f3d3-4498-8f9a-de3b39046a7c/household-information[1]	3	1	1	27	1	2		3		1	1	1	2	1	1	2	1	0	2	0	1	0	2	0	1	3		4	2	2		1	2		2	2
May 16, 2021 7:06:00 PM	uuid:ab32f36c-2b5b-453c-ba2d-45dc9957af6a	10	13	2	Kibonkho	May 12, 2021	1162	1	70	1162	1	uuid:ab32f36c-2b5b-453c-ba2d-45dc9957af6a/household-information[5]	5	5	6	12	2	2		6	student	1	2	2	0	1	1	2	1	2	2	0	0	0	0	0	1	3		2	4	5	steel bar	2	5	Processed wood	2	2
May 16, 2021 7:06:00 PM	uuid:ab32f36c-2b5b-453c-ba2d-45dc9957af6a	10	13	2	Kibonkho	May 12, 2021	1162	1	70	1162	1	uuid:ab32f36c-2b5b-453c-ba2d-45dc9957af6a/household-information[3]	5	3	6	10	1	2		6	student	1	2	2	0	1	1	2	1	2	2	0	0	0	0	0	1	3		2	4	5	steel bar	2	5	Processed wood	2	2
May 16, 2021 7:06:00 PM	uuid:ab32f36c-2b5b-453c-ba2d-45dc9957af6a	10	13	2	Kibonkho	May 12, 2021	1162	1	70	1162	1	uuid:ab32f36c-2b5b-453c-ba2d-45dc9957af6a/household-information[1]	5	1	1	70	2	0		3		1	2	2	0	1	1	2	1	2	2	0	0	0	0	0	1	3		2	4	5	steel bar	2	5	Processed wood	2	2
May 16, 2021 7:06:00 PM	uuid:ab32f36c-2b5b-453c-ba2d-45dc9957af6a	10	13	2	Kibonkho	May 12, 2021	1162	1	70	1162	1	uuid:ab32f36c-2b5b-453c-ba2d-45dc9957af6a/household-information[4]	5	4	6	4	2	0		0		1	2	2	0	1	1	2	1	2	2	0	0	0	0	0	1	3		2	4	5	steel bar	2	5	Processed wood	2	2
May 16, 2021 7:17:28 PM	uuid:8773780f-4873-4aa5-968f-3c119a163201	4	14	2	Kibonkho	May 12, 2021	1163	1	35	1163	1	uuid:8773780f-4873-4aa5-968f-3c119a163201/household-information[4]	4	4	3	8	1	2		0		1	1	1	2	1	1	2	0	3	1	0	0	3	1	0	1	3		2	1	1		1	2		2	2
May 16, 2021 7:17:28 PM	uuid:8773780f-4873-4aa5-968f-3c119a163201	4	14	2	Kibonkho	May 12, 2021	1163	1	35	1163	1	uuid:8773780f-4873-4aa5-968f-3c119a163201/household-information[3]	4	3	3	12	2	2		0		2		1	2	1	1	2	0	3	1	0	0	3	1	0	1	3		2	1	1		1	2		2	2
May 16, 2021 7:17:28 PM	uuid:8773780f-4873-4aa5-968f-3c119a163201	4	14	2	Kibonkho	May 12, 2021	1163	1	35	1163	1	uuid:8773780f-4873-4aa5-968f-3c119a163201/household-information[2]	4	2	3	15	1	2		0		1	1	1	2	1	1	2	0	3	1	0	0	3	1	0	1	3		2	1	1		1	2		2	2
May 16, 2021 7:06:02 PM	uuid:d167a95c-7f6c-4e57-b302-6f6800e65347	14	16	2	Kibonkho	May 12, 2021	1165	1	51	1165	2	uuid:d167a95c-7f6c-4e57-b302-6f6800e65347/household-information[2]	5	2	2	51	2	2		3		1	2	1	2	1	1	2	0	2	3	0	0	2	0	0	1	3		4	1	1		1	3		2	2
May 16, 2021 7:06:02 PM	uuid:d167a95c-7f6c-4e57-b302-6f6800e65347	14	16	2	Kibonkho	May 12, 2021	1165	1	51	1165	2	uuid:d167a95c-7f6c-4e57-b302-6f6800e65347/household-information[4]	5	4	3	16	2	3		0		1	1	1	2	1	1	2	0	2	3	0	0	2	0	0	1	3		4	1	1		1	3		2	2
May 16, 2021 7:06:02 PM	uuid:d167a95c-7f6c-4e57-b302-6f6800e65347	14	16	2	Kibonkho	May 12, 2021	1165	1	51	1165	2	uuid:d167a95c-7f6c-4e57-b302-6f6800e65347/household-information[5]	5	5	3	13	1	2		0		1	1	1	2	1	1	2	0	2	3	0	0	2	0	0	1	3		4	1	1		1	3		2	2
May 16, 2021 7:06:02 PM	uuid:d167a95c-7f6c-4e57-b302-6f6800e65347	14	16	2	Kibonkho	May 12, 2021	1165	1	51	1165	2	uuid:d167a95c-7f6c-4e57-b302-6f6800e65347/household-information[1]	5	1	1	60	1	2		3		1	2	1	2	1	1	2	0	2	3	0	0	2	0	0	1	3		4	1	1		1	3		2	2
May 16, 2021 7:14:45 PM	uuid:39d8ab27-bdff-45c0-a3df-c16154eb0a1d	12	15	2	Kibonkho	May 12, 2021	1166	1	24	1166	1	uuid:39d8ab27-bdff-45c0-a3df-c16154eb0a1d/household-information[3]	3	3	3	1	1	0		0		1	1	1	2	1	1	2	2	0	1	0	2	0	1	0	1	3		1	2	5	Net	2	2		2	2
May 16, 2021 7:14:45 PM	uuid:39d8ab27-bdff-45c0-a3df-c16154eb0a1d	12	15	2	Kibonkho	May 12, 2021	1166	1	24	1166	1	uuid:39d8ab27-bdff-45c0-a3df-c16154eb0a1d/household-information[1]	3	1	1	24	2	2		3		1	1	1	2	1	1	2	2	0	1	0	2	0	1	0	1	3		1	2	5	Net	2	2		2	2
May 16, 2021 6:57:38 PM	uuid:5b99a6a1-2ae2-4faa-9816-687eb30b5530	2	12	2	Kibonkho	May 12, 2021	1168	1	37	1168	1	uuid:5b99a6a1-2ae2-4faa-9816-687eb30b5530/household-information[1]	3	1	1	37	1	2		3		2		1	2	1	1	2	0	0	0	0	0	0	0	0	1	3		2	2	1		1	2		2	2
May 16, 2021 6:57:38 PM	uuid:5b99a6a1-2ae2-4faa-9816-687eb30b5530	2	12	2	Kibonkho	May 12, 2021	1168	1	37	1168	1	uuid:5b99a6a1-2ae2-4faa-9816-687eb30b5530/household-information[2]	3	2	3	4	1	0		3		2		1	2	1	1	2	0	0	0	0	0	0	0	0	1	3		2	2	1		1	2		2	2
May 16, 2021 7:06:02 PM	uuid:38b65d8f-12d7-4a0d-95d2-501e25108ea4	9	13	2	Kibonkho	May 12, 2021	1169	1	28	1169	1	uuid:38b65d8f-12d7-4a0d-95d2-501e25108ea4/household-information[2]	2	2	4	51	1	2		3		1	2	1	3	1	1	1	0	0	2	0	0	0	0	0	1	3		2	2	2		2	5	Processed wood	2	2
May 16, 2021 7:06:02 PM	uuid:38b65d8f-12d7-4a0d-95d2-501e25108ea4	9	13	2	Kibonkho	May 12, 2021	1169	1	28	1169	1	uuid:38b65d8f-12d7-4a0d-95d2-501e25108ea4/household-information[1]	2	1	1	28	1	3		3		1	2	1	3	1	1	1	0	0	2	0	0	0	0	0	1	3		2	2	2		2	5	Processed wood	2	2
May 16, 2021 7:17:30 PM	uuid:3ed026f6-f65d-49da-aeb6-e238e8f3f2f6	4	14	2	Kibonkho	May 12, 2021	1170	1	35	1170	2	uuid:3ed026f6-f65d-49da-aeb6-e238e8f3f2f6/household-information[3]	6	3	3	15	2	3		0		1	1	1	2	1	1	2	1	3	2	0	1	3	2	0	1	3		4	1	1		1	2		2	2
May 16, 2021 7:17:30 PM	uuid:3ed026f6-f65d-49da-aeb6-e238e8f3f2f6	4	14	2	Kibonkho	May 12, 2021	1170	1	35	1170	2	uuid:3ed026f6-f65d-49da-aeb6-e238e8f3f2f6/household-information[1]	6	1	2	35	2	0		3		1	1	1	2	1	1	2	1	3	2	0	1	3	2	0	1	3		4	1	1		1	2		2	2
May 16, 2021 7:17:30 PM	uuid:3ed026f6-f65d-49da-aeb6-e238e8f3f2f6	4	14	2	Kibonkho	May 12, 2021	1170	1	35	1170	2	uuid:3ed026f6-f65d-49da-aeb6-e238e8f3f2f6/household-information[2]	6	2	1	48	1	2		3		1	1	1	2	1	1	2	1	3	2	0	1	3	2	0	1	3		4	1	1		1	2		2	2
May 16, 2021 7:17:30 PM	uuid:3ed026f6-f65d-49da-aeb6-e238e8f3f2f6	4	14	2	Kibonkho	May 12, 2021	1170	1	35	1170	2	uuid:3ed026f6-f65d-49da-aeb6-e238e8f3f2f6/household-information[5]	6	5	3	9	1	2		0		1	1	1	2	1	1	2	1	3	2	0	1	3	2	0	1	3		4	1	1		1	2		2	2
May 16, 2021 7:17:30 PM	uuid:3ed026f6-f65d-49da-aeb6-e238e8f3f2f6	4	14	2	Kibonkho	May 12, 2021	1170	1	35	1170	2	uuid:3ed026f6-f65d-49da-aeb6-e238e8f3f2f6/household-information[4]	6	4	3	11	1	2		0		1	1	1	2	1	1	2	1	3	2	0	1	3	2	0	1	3		4	1	1		1	2		2	2
May 16, 2021 7:17:30 PM	uuid:3ed026f6-f65d-49da-aeb6-e238e8f3f2f6	4	14	2	Kibonkho	May 12, 2021	1170	1	35	1170	2	uuid:3ed026f6-f65d-49da-aeb6-e238e8f3f2f6/household-information[6]	6	6	3	2	1	0		0		1	1	1	2	1	1	2	1	3	2	0	1	3	2	0	1	3		4	1	1		1	2		2	2
May 16, 2021 7:01:11 PM	uuid:a169b3f5-ee9a-47fa-9d9a-f94de8d31100	5	11	2	Kibonkho	May 12, 2021	1171	1	45	1171	1	uuid:a169b3f5-ee9a-47fa-9d9a-f94de8d31100/household-information[1]	3	1	1	45	2	2		2		1	1	1	2	1	1	2	0	2	1	0	0	2	1	0	1	3		2	3	2		1	2		2	5
May 16, 2021 7:01:11 PM	uuid:a169b3f5-ee9a-47fa-9d9a-f94de8d31100	5	11	2	Kibonkho	May 12, 2021	1171	1	45	1171	1	uuid:a169b3f5-ee9a-47fa-9d9a-f94de8d31100/household-information[2]	3	2	3	8	1	2		0		1	1	1	2	1	1	2	0	2	1	0	0	2	1	0	1	3		2	3	2		1	2		2	5
May 16, 2021 7:06:03 PM	uuid:a2d19d67-c7b8-42aa-a069-33e9f34f70ba	3	16	2	Kibonkho	May 12, 2021	1172	1	24	1172	2	uuid:a2d19d67-c7b8-42aa-a069-33e9f34f70ba/household-information[1]	4	1	1	26	1	2		3		1	1	1	2	1	1	2	1	0	3	0	1	0	3	0	1	3		1	2	2		1	2		2	2
May 16, 2021 7:06:03 PM	uuid:a2d19d67-c7b8-42aa-a069-33e9f34f70ba	3	16	2	Kibonkho	May 12, 2021	1172	1	24	1172	2	uuid:a2d19d67-c7b8-42aa-a069-33e9f34f70ba/household-information[2]	4	2	2	24	2	2		3		1	1	1	2	1	1	2	1	0	3	0	1	0	3	0	1	3		1	2	2		1	2		2	2
May 16, 2021 7:06:03 PM	uuid:a2d19d67-c7b8-42aa-a069-33e9f34f70ba	3	16	2	Kibonkho	May 12, 2021	1172	1	24	1172	2	uuid:a2d19d67-c7b8-42aa-a069-33e9f34f70ba/household-information[4]	4	4	3	4	2	0		0		1	1	1	2	1	1	2	1	0	3	0	1	0	3	0	1	3		1	2	2		1	2		2	2
May 16, 2021 7:14:46 PM	uuid:cfe46253-2092-4371-b071-5a7f56960fe0	12	15	2	Kibonkho	May 12, 2021	1173	1	51	1173	1	uuid:cfe46253-2092-4371-b071-5a7f56960fe0/household-information[3]	8	3	6	15	1	2		0		1	1	2	0	2	2	2	1	4	3	0	1	4	3	0	1	3		4	1	2		1	3		2	2
May 16, 2021 7:14:46 PM	uuid:cfe46253-2092-4371-b071-5a7f56960fe0	12	15	2	Kibonkho	May 12, 2021	1173	1	51	1173	1	uuid:cfe46253-2092-4371-b071-5a7f56960fe0/household-information[4]	8	4	3	15	2	2		0		1	1	2	0	2	2	2	1	4	3	0	1	4	3	0	2	3		4	1	2		1	2		2	2
May 16, 2021 7:14:46 PM	uuid:cfe46253-2092-4371-b071-5a7f56960fe0	12	15	2	Kibonkho	May 12, 2021	1173	1	51	1173	1	uuid:cfe46253-2092-4371-b071-5a7f56960fe0/household-information[2]	8	2	3	29	2	2		3		1	1	2	0	2	2	2	1	4	3	0	1	4	3	0	2	3		4	1	2		1	2		2	2
May 16, 2021 7:14:46 PM	uuid:cfe46253-2092-4371-b071-5a7f56960fe0	12	15	2	Kibonkho	May 12, 2021	1173	1	51	1173	1	uuid:cfe46253-2092-4371-b071-5a7f56960fe0/household-information[1]	8	1	1	51	2	0		3		1	1	2	0	2	2	2	1	4	3	0	1	4	3	0	2	3		4	1	2		1	2		2	2
May 16, 2021 7:14:46 PM	uuid:cfe46253-2092-4371-b071-5a7f56960fe0	12	15	2	Kibonkho	May 12, 2021	1173	1	51	1173	1	uuid:cfe46253-2092-4371-b071-5a7f56960fe0/household-information[8]	8	8	6	11	2	2		0		1	1	2	0	2	2	2	1	4	3	0	1	4	3	0	2	3		4	1	2		1	2		2	2
May 16, 2021 7:14:46 PM	uuid:cfe46253-2092-4371-b071-5a7f56960fe0	12	15	2	Kibonkho	May 12, 2021	1173	1	51	1173	1	uuid:cfe46253-2092-4371-b071-5a7f56960fe0/household-information[6]	8	6	6	1	1	0		0		1	1	2	0	2	1	2	1	4	3	0	1	4	3	0	2	3		4	1	2		1	2		2	2
May 16, 2021 7:14:46 PM	uuid:cfe46253-2092-4371-b071-5a7f56960fe0	12	15	2	Kibonkho	May 12, 2021	1173	1	51	1173	1	uuid:cfe46253-2092-4371-b071-5a7f56960fe0/household-information[7]	8	7	3	20	2	2		0		1	1	2	0	2	2	2	1	4	3	0	1	4	3	0	2	3		4	1	2		1	2		2	2
May 16, 2021 6:57:39 PM	uuid:a7804af7-469f-410f-a0a3-9ecddf5a3cdd	7	12	2	Kibonkho	May 12, 2021	1175	1	58	1175	1	uuid:a7804af7-469f-410f-a0a3-9ecddf5a3cdd/household-information[1]	4	1	1	58	1	2		3		1	1	1	2	1	1	2	0	2	2	0	0	0	2	0	1	3		4	3	1		2	2		2	2
May 16, 2021 6:57:39 PM	uuid:a7804af7-469f-410f-a0a3-9ecddf5a3cdd	7	12	2	Kibonkho	May 12, 2021	1175	1	58	1175	1	uuid:a7804af7-469f-410f-a0a3-9ecddf5a3cdd/household-information[3]	4	3	3	14	1	2		0		1	2	1	2	1	1	2	0	2	2	0	0	0	2	0	1	3		4	3	1		2	2		2	2
May 16, 2021 6:57:39 PM	uuid:a7804af7-469f-410f-a0a3-9ecddf5a3cdd	7	12	2	Kibonkho	May 12, 2021	1175	1	58	1175	1	uuid:a7804af7-469f-410f-a0a3-9ecddf5a3cdd/household-information[4]	4	4	3	6	2	1		0		1	2	1	2	1	1	2	0	2	2	0	0	0	2	0	1	3		4	3	1		2	2		2	2
May 16, 2021 6:57:39 PM	uuid:a7804af7-469f-410f-a0a3-9ecddf5a3cdd	7	12	2	Kibonkho	May 12, 2021	1175	1	58	1175	1	uuid:a7804af7-469f-410f-a0a3-9ecddf5a3cdd/household-information[2]	4	2	2	51	2	2		3		1	1	1	2	1	1	2	0	2	2	0	0	0	2	0	1	3		4	3	1		2	2		2	2
May 16, 2021 7:06:03 PM	uuid:dc40bc81-af3b-4b03-992c-688736b8ff32	10	13	2	Kibonkho	May 12, 2021	1176	1	45	1176	1	uuid:dc40bc81-af3b-4b03-992c-688736b8ff32/household-information[2]	6	2	2	43	2	2		3		1	1	1	2	1	1	2	1	3	2	0	1	3	2	0	1	3		4	2	1		1	5	Processed wood	2	2
May 16, 2021 7:06:03 PM	uuid:dc40bc81-af3b-4b03-992c-688736b8ff32	10	13	2	Kibonkho	May 12, 2021	1176	1	45	1176	1	uuid:dc40bc81-af3b-4b03-992c-688736b8ff32/household-information[3]	6	3	3	12	1	2		6	student	1	1	1	2	1	1	2	1	3	2	0	1	3	2	0	1	3		4	2	1		1	5	Processed wood	2	2
May 16, 2021 7:06:03 PM	uuid:dc40bc81-af3b-4b03-992c-688736b8ff32	10	13	2	Kibonkho	May 12, 2021	1176	1	45	1176	1	uuid:dc40bc81-af3b-4b03-992c-688736b8ff32/household-information[6]	6	6	3	2	1	0		0		1	1	1	2	1	1	2	1	3	2	0	1	3	2	0	1	3		4	2	1		1	5	Processed wood	2	2
May 16, 2021 7:06:03 PM	uuid:dc40bc81-af3b-4b03-992c-688736b8ff32	10	13	2	Kibonkho	May 12, 2021	1176	1	45	1176	1	uuid:dc40bc81-af3b-4b03-992c-688736b8ff32/household-information[1]	6	1	1	45	1	2		3		1	1	1	2	1	1	2	1	3	2	0	1	3	2	0	1	3		4	2	1		1	5	Processed wood	2	2
May 16, 2021 7:06:03 PM	uuid:dc40bc81-af3b-4b03-992c-688736b8ff32	10	13	2	Kibonkho	May 12, 2021	1176	1	45	1176	1	uuid:dc40bc81-af3b-4b03-992c-688736b8ff32/household-information[4]	6	4	3	14	2	2		6	student	1	1	1	2	1	1	2	1	3	2	0	1	3	2	0	1	3		4	2	1		1	5	Processed wood	2	2
May 16, 2021 7:06:03 PM	uuid:dc40bc81-af3b-4b03-992c-688736b8ff32	10	13	2	Kibonkho	May 12, 2021	1176	1	45	1176	1	uuid:dc40bc81-af3b-4b03-992c-688736b8ff32/household-information[5]	6	5	3	7	2	2		6	student	1	1	1	2	1	1	2	1	3	2	0	1	3	2	0	1	3		4	2	1		1	5	Processed wood	2	2
May 16, 2021 7:17:31 PM	uuid:e5f4ec64-7c5c-479b-9208-da39e6b5cd3c	11	14	2	Kibonkho	May 12, 2021	1177	1	27	1177	2	uuid:e5f4ec64-7c5c-479b-9208-da39e6b5cd3c/household-information[3]	5	3	3	2	2	0		0		1	1	1	2	1	1	2	1	2	2	1	1	2	2	1	1	3		4	4	2		1	3		2	2
May 16, 2021 7:17:31 PM	uuid:e5f4ec64-7c5c-479b-9208-da39e6b5cd3c	11	14	2	Kibonkho	May 12, 2021	1177	1	27	1177	2	uuid:e5f4ec64-7c5c-479b-9208-da39e6b5cd3c/household-information[1]	5	1	2	27	2	2		3		1	1	1	2	1	1	2	1	2	2	1	1	2	2	1	1	3		4	4	2		1	3		2	2
May 16, 2021 7:17:31 PM	uuid:e5f4ec64-7c5c-479b-9208-da39e6b5cd3c	11	14	2	Kibonkho	May 12, 2021	1177	1	27	1177	2	uuid:e5f4ec64-7c5c-479b-9208-da39e6b5cd3c/household-information[4]	5	4	3	11	2	2		0		1	1	1	2	1	1	2	1	2	2	1	1	2	2	1	1	3		4	4	2		1	3		2	2
May 16, 2021 7:17:31 PM	uuid:e5f4ec64-7c5c-479b-9208-da39e6b5cd3c	11	14	2	Kibonkho	May 12, 2021	1177	1	27	1177	2	uuid:e5f4ec64-7c5c-479b-9208-da39e6b5cd3c/household-information[5]	5	5	3	7	2	2		0		1	1	1	2	1	1	2	1	2	2	1	1	2	2	1	1	3		4	4	2		1	3		2	2
May 16, 2021 7:17:31 PM	uuid:e5f4ec64-7c5c-479b-9208-da39e6b5cd3c	11	14	2	Kibonkho	May 12, 2021	1177	1	27	1177	2	uuid:e5f4ec64-7c5c-479b-9208-da39e6b5cd3c/household-information[2]	5	2	1	30	1	2		3		2		1	2	1	1	2	1	2	2	1	1	2	2	1	1	3		4	4	2		1	3		2	2
May 16, 2021 7:01:12 PM	uuid:dfe451f8-ba5a-4ff6-a33c-c2463a6c8659	5	11	2	Kibonkho	May 12, 2021	1178	1	71	1178	1	uuid:dfe451f8-ba5a-4ff6-a33c-c2463a6c8659/household-information[1]	2	1	1	71	1	2		3		1	1	1	2	1	1	2	0	0	2	0	0	0	2	0	1	3		4	2	0		1	2		2	2
May 16, 2021 7:06:05 PM	uuid:6de8a254-558b-4755-94d1-6d88a74e295d	14	16	2	Kibonkho	May 12, 2021	1179	1	64	1179	1	uuid:6de8a254-558b-4755-94d1-6d88a74e295d/household-information[1]	2	1	1	64	1	2		3		1	1	1	2	1	1	2	0	0	2	0	0	0	2	0	1	3		2	4	5	Net	2	2		2	2
May 16, 2021 7:06:05 PM	uuid:6de8a254-558b-4755-94d1-6d88a74e295d	14	16	2	Kibonkho	May 12, 2021	1179	1	64	1179	1	uuid:6de8a254-558b-4755-94d1-6d88a74e295d/household-information[2]	2	2	2	62	2	2		3		1	1	1	2	1	1	2	0	0	2	0	0	0	2	0	1	3		2	4	5	Net	2	2		2	2
May 16, 2021 7:14:02 PM	uuid:4ca9fe98-999b-4d6b-bb70-3a8297f2b1c6	6	17	2	Kibonkho	May 12, 2021	1181	1	28	1181	1	uuid:4ca9fe98-999b-4d6b-bb70-3a8297f2b1c6/household-information[2]	4	2	2	19	2	2		3		1	1	1	2	1	1	2	1	1	2	0	1	1	2	0	1	3		4	3	2		2	2		2	5
May 16, 2021 7:14:02 PM	uuid:4ca9fe98-999b-4d6b-bb70-3a8297f2b1c6	6	17	2	Kibonkho	May 12, 2021	1181	1	28	1181	1	uuid:4ca9fe98-999b-4d6b-bb70-3a8297f2b1c6/household-information[4]	4	4	3	2	2	0		0		1	1	1	2	1	1	2	1	1	2	0	1	1	2	0	1	3		4	3	2		2	2		2	5
May 16, 2021 7:14:02 PM	uuid:4ca9fe98-999b-4d6b-bb70-3a8297f2b1c6	6	17	2	Kibonkho	May 12, 2021	1181	1	28	1181	1	uuid:4ca9fe98-999b-4d6b-bb70-3a8297f2b1c6/household-information[1]	4	1	1	28	1	2		5		1	1	1	2	1	1	2	1	1	2	0	1	1	2	0	1	3		4	3	2		2	2		2	5
May 16, 2021 7:14:02 PM	uuid:4ca9fe98-999b-4d6b-bb70-3a8297f2b1c6	6	17	2	Kibonkho	May 12, 2021	1181	1	28	1181	1	uuid:4ca9fe98-999b-4d6b-bb70-3a8297f2b1c6/household-information[3]	4	3	3	6	1	0		0		1	1	1	2	1	1	2	1	1	2	0	1	1	2	0	1	3		4	3	2		2	2		2	5
May 16, 2021 6:57:40 PM	uuid:488aabe2-90be-4232-982a-712111b27147	2	12	2	Kibonkho	May 12, 2021	1182	1	56	1182	2	uuid:488aabe2-90be-4232-982a-712111b27147/household-information[7]	9	7	6	8	2	2		0		1	2	1	2	1	1	2	0	7	2	0	0	0	2	0	1	3		4	4	1		2	2		2	2
May 16, 2021 6:57:40 PM	uuid:488aabe2-90be-4232-982a-712111b27147	2	12	2	Kibonkho	May 12, 2021	1182	1	56	1182	2	uuid:488aabe2-90be-4232-982a-712111b27147/household-information[4]	9	4	6	9	2	2		0		1	2	1	2	1	1	2	0	7	2	0	0	0	2	0	1	3		4	4	1		2	2		2	2
May 16, 2021 6:57:40 PM	uuid:488aabe2-90be-4232-982a-712111b27147	2	12	2	Kibonkho	May 12, 2021	1182	1	56	1182	2	uuid:488aabe2-90be-4232-982a-712111b27147/household-information[1]	9	1	1	64	1	2		3		1	1	1	2	1	1	2	0	7	2	0	0	0	2	0	1	3		4	4	1		2	2		2	2
May 16, 2021 6:57:40 PM	uuid:488aabe2-90be-4232-982a-712111b27147	2	12	2	Kibonkho	May 12, 2021	1182	1	56	1182	2	uuid:488aabe2-90be-4232-982a-712111b27147/household-information[8]	9	8	6	7	2	2		0		1	2	1	2	1	1	2	0	7	2	0	0	0	2	0	1	3		4	4	1		2	2		2	2
May 16, 2021 6:57:40 PM	uuid:488aabe2-90be-4232-982a-712111b27147	2	12	2	Kibonkho	May 12, 2021	1182	1	56	1182	2	uuid:488aabe2-90be-4232-982a-712111b27147/household-information[6]	9	6	6	12	2	2		0		1	2	1	2	1	1	2	0	7	2	0	0	0	2	0	1	3		4	4	1		2	2		2	2
May 16, 2021 6:57:40 PM	uuid:488aabe2-90be-4232-982a-712111b27147	2	12	2	Kibonkho	May 12, 2021	1182	1	56	1182	2	uuid:488aabe2-90be-4232-982a-712111b27147/household-information[2]	9	2	2	56	2	2		3		1	1	1	2	1	1	2	0	7	2	0	0	0	2	0	1	3		4	4	1		2	2		2	2
May 16, 2021 6:57:40 PM	uuid:488aabe2-90be-4232-982a-712111b27147	2	12	2	Kibonkho	May 12, 2021	1182	1	56	1182	2	uuid:488aabe2-90be-4232-982a-712111b27147/household-information[9]	9	9	6	5	1	0		0		1	2	1	2	1	1	2	0	7	2	0	0	0	2	0	1	3		4	4	1		2	2		2	2
May 16, 2021 6:57:40 PM	uuid:488aabe2-90be-4232-982a-712111b27147	2	12	2	Kibonkho	May 12, 2021	1182	1	56	1182	2	uuid:488aabe2-90be-4232-982a-712111b27147/household-information[3]	9	3	6	11	2	0		0		1	2	1	2	1	1	2	0	7	2	0	0	0	2	0	1	3		4	4	1		2	2		2	2
May 16, 2021 6:57:40 PM	uuid:488aabe2-90be-4232-982a-712111b27147	2	12	2	Kibonkho	May 12, 2021	1182	1	56	1182	2	uuid:488aabe2-90be-4232-982a-712111b27147/household-information[5]	9	5	6	9	2	2		0		1	2	1	2	1	1	2	0	7	2	0	0	0	2	0	1	3		4	4	1		2	2		2	2
May 16, 2021 7:06:04 PM	uuid:d879c836-1e0a-4324-812e-c66b66da2194	9	13	2	Kibonkho	May 12, 2021	1183	1	35	1183	1	uuid:d879c836-1e0a-4324-812e-c66b66da2194/household-information[2]	2	2	2	35	2	2		2		1	1	1	2	1	1	2	0	0	2	0	0	0	2	0	1	3		1	4	5	Processed wood	1	5	Processed wood	2	2
May 16, 2021 7:06:04 PM	uuid:d879c836-1e0a-4324-812e-c66b66da2194	9	13	2	Kibonkho	May 12, 2021	1183	1	35	1183	1	uuid:d879c836-1e0a-4324-812e-c66b66da2194/household-information[1]	2	1	1	35	1	2		3		1	1	1	2	1	1	2	0	0	2	0	0	0	2	0	1	3		1	4	5	Processed wood	1	5	Processed wood	2	2
May 17, 2021 3:58:58 PM	uuid:aa274c39-5d95-4a0a-91a6-0c37de9c9b6d	1	11	2	Kibonkho	May 17, 2021	1184	1	53	1184	1	uuid:aa274c39-5d95-4a0a-91a6-0c37de9c9b6d/household-information[5]	6	5	3	16	1	2		0		1	1	1	2	2	2	2	0	3	3	0	0	3	3	0	1	3		4	2	2		2	2		2	2
May 17, 2021 3:58:58 PM	uuid:aa274c39-5d95-4a0a-91a6-0c37de9c9b6d	1	11	2	Kibonkho	May 17, 2021	1184	1	53	1184	1	uuid:aa274c39-5d95-4a0a-91a6-0c37de9c9b6d/household-information[6]	6	6	3	8	1	0		0		1	1	1	2	2	1	2	0	3	3	0	0	3	3	0	1	3		4	2	2		2	2		2	2
May 17, 2021 3:58:58 PM	uuid:aa274c39-5d95-4a0a-91a6-0c37de9c9b6d	1	11	2	Kibonkho	May 17, 2021	1184	1	53	1184	1	uuid:aa274c39-5d95-4a0a-91a6-0c37de9c9b6d/household-information[2]	6	2	2	51	2	0		3		1	1	1	2	2	2	2	0	3	3	0	0	3	3	0	2	3		2	2	2		1	2		2	2
May 17, 2021 3:58:58 PM	uuid:aa274c39-5d95-4a0a-91a6-0c37de9c9b6d	1	11	2	Kibonkho	May 17, 2021	1184	1	53	1184	1	uuid:aa274c39-5d95-4a0a-91a6-0c37de9c9b6d/household-information[3]	6	3	3	18	2	3		0		1	1	1	2	2	2	2	0	3	3	0	0	3	3	0	1	3		4	2	2		2	2		2	2
May 17, 2021 3:58:58 PM	uuid:aa274c39-5d95-4a0a-91a6-0c37de9c9b6d	1	11	2	Kibonkho	May 17, 2021	1184	1	53	1184	1	uuid:aa274c39-5d95-4a0a-91a6-0c37de9c9b6d/household-information[1]	6	1	1	53	1	2		3		1	1	1	2	2	2	2	0	3	3	0	0	3	3	0	1	3		4	2	2		2	2		2	2
May 16, 2021 7:01:13 PM	uuid:0312a111-8cf1-4194-9738-4e96716d70d2	5	11	2	Kibonkho	May 12, 2021	1185	1	32	1185	2	uuid:0312a111-8cf1-4194-9738-4e96716d70d2/household-information[3]	3	3	3	1	1	0		0		1	1	1	2	1	1	2	1	0	2	0	1	0	2	0	1	3		1	1	1		1	2		2	2
May 16, 2021 7:01:13 PM	uuid:0312a111-8cf1-4194-9738-4e96716d70d2	5	11	2	Kibonkho	May 12, 2021	1185	1	32	1185	2	uuid:0312a111-8cf1-4194-9738-4e96716d70d2/household-information[2]	3	2	2	32	2	2		3		1	1	1	2	1	1	2	1	0	2	0	1	0	2	0	1	3		1	1	1		1	2		2	2
May 16, 2021 7:14:49 PM	uuid:1017e79c-8738-4e45-a8cb-5bce2ac92ac6	12	15	2	Kibonkho	May 12, 2021	1187	1	62	1187	3	uuid:1017e79c-8738-4e45-a8cb-5bce2ac92ac6/household-information[2]	4	2	2	29	2	2		3		1	1	1	2	1	1	2	1	1	2	0	1	1	2	0	1	3		4	1	2		1	2		2	2
May 16, 2021 7:14:49 PM	uuid:1017e79c-8738-4e45-a8cb-5bce2ac92ac6	12	15	2	Kibonkho	May 12, 2021	1187	1	62	1187	3	uuid:1017e79c-8738-4e45-a8cb-5bce2ac92ac6/household-information[3]	4	3	3	8	2	2		0		1	1	1	2	1	1	2	1	1	2	0	1	1	2	0	1	3		4	1	2		1	2		2	2
May 16, 2021 7:14:49 PM	uuid:1017e79c-8738-4e45-a8cb-5bce2ac92ac6	12	15	2	Kibonkho	May 12, 2021	1187	1	62	1187	3	uuid:1017e79c-8738-4e45-a8cb-5bce2ac92ac6/household-information[4]	4	4	3	3	2	0		0		1	1	1	2	1	1	2	1	1	2	0	1	1	2	0	1	3		4	1	2		1	2		2	2
May 16, 2021 7:14:04 PM	uuid:c74c0d79-d287-48f0-a9d3-3671527749df	16	17	2	Kibonkho	May 12, 2021	1188	1	20	1188	1	uuid:c74c0d79-d287-48f0-a9d3-3671527749df/household-information[3]	3	3	3	16	1	2		3		1	1	2	0	1	1	2	0	2	1	0	0	2	1	0	1	1		4	2	2		1	2		2	2
May 16, 2021 7:14:04 PM	uuid:c74c0d79-d287-48f0-a9d3-3671527749df	16	17	2	Kibonkho	May 12, 2021	1188	1	20	1188	1	uuid:c74c0d79-d287-48f0-a9d3-3671527749df/household-information[2]	3	2	3	14	1	2		3		1	1	2	0	1	1	2	0	2	1	0	0	2	1	0	1	1		4	2	2		1	2		2	2
May 16, 2021 7:14:04 PM	uuid:c74c0d79-d287-48f0-a9d3-3671527749df	16	17	2	Kibonkho	May 12, 2021	1188	1	20	1188	1	uuid:c74c0d79-d287-48f0-a9d3-3671527749df/household-information[1]	3	1	1	20	2	0		3		1	1	2	0	1	1	2	0	2	1	0	0	2	1	0	1	1		4	2	2		1	2		2	2
May 16, 2021 6:57:41 PM	uuid:9f1537b7-c915-4971-a55b-b8a3bb3bdbd5	2	12	2	Kibonkho	May 12, 2021	1189	1	35	1189	1	uuid:9f1537b7-c915-4971-a55b-b8a3bb3bdbd5/household-information[1]	1	1	1	35	1	2		3		1	2	1	2	1	1	2	0	0	1	0	0	0	0	0	1	3		4	1	1		1	2		2	2
May 16, 2021 6:57:44 PM	uuid:bb8fb838-ea3e-43a6-99d2-e29e72cfc480	7	12	2	Kibonkho	May 12, 2021	1190	1	44	1190	2	uuid:bb8fb838-ea3e-43a6-99d2-e29e72cfc480/household-information[4]	6	4	3	11	1	2		0		1	1	1	2	1	1	2	0	4	2	0	0	4	2	0	1	3		1	4	2		1	2		2	6
May 16, 2021 6:57:44 PM	uuid:bb8fb838-ea3e-43a6-99d2-e29e72cfc480	7	12	2	Kibonkho	May 12, 2021	1190	1	44	1190	2	uuid:bb8fb838-ea3e-43a6-99d2-e29e72cfc480/household-information[5]	6	5	3	10	1	2		0		1	1	1	2	1	1	2	0	4	2	0	0	4	2	0	1	3		1	4	2		1	2		2	6
May 16, 2021 6:57:44 PM	uuid:bb8fb838-ea3e-43a6-99d2-e29e72cfc480	7	12	2	Kibonkho	May 12, 2021	1190	1	44	1190	2	uuid:bb8fb838-ea3e-43a6-99d2-e29e72cfc480/household-information[3]	6	3	3	14	1	2		0		1	1	1	2	1	1	2	0	4	2	0	0	4	2	0	1	3		1	4	2		1	2		2	6
May 16, 2021 6:57:44 PM	uuid:bb8fb838-ea3e-43a6-99d2-e29e72cfc480	7	12	2	Kibonkho	May 12, 2021	1190	1	44	1190	2	uuid:bb8fb838-ea3e-43a6-99d2-e29e72cfc480/household-information[1]	6	1	2	44	2	2		3		1	1	1	2	1	1	2	0	4	2	0	0	4	2	0	1	3		1	4	2		1	2		2	6
May 16, 2021 6:57:44 PM	uuid:bb8fb838-ea3e-43a6-99d2-e29e72cfc480	7	12	2	Kibonkho	May 12, 2021	1190	1	44	1190	2	uuid:bb8fb838-ea3e-43a6-99d2-e29e72cfc480/household-information[2]	6	2	1	44	1	2		3		1	1	1	2	1	1	2	0	4	2	0	0	4	2	0	1	3		1	4	2		1	2		2	6
May 16, 2021 6:57:44 PM	uuid:bb8fb838-ea3e-43a6-99d2-e29e72cfc480	7	12	2	Kibonkho	May 12, 2021	1190	1	44	1190	2	uuid:bb8fb838-ea3e-43a6-99d2-e29e72cfc480/household-information[6]	6	6	3	7	1	2		0		1	1	1	2	1	1	2	0	4	2	0	0	4	2	0	1	3		1	4	2		1	2		2	6
May 16, 2021 7:06:05 PM	uuid:ee8dbddc-d45b-41aa-ae89-3a601d135a80	10	13	2	Kibonkho	May 12, 2021	1191	1	60	1191	1	uuid:ee8dbddc-d45b-41aa-ae89-3a601d135a80/household-information[3]	5	3	3	26	1	3		6	Technician	1	1	1	2	1	1	2	0	1	4	0	0	1	4	0	1	3		4	8	5	Processed wood	2	3		2	5
May 16, 2021 7:06:05 PM	uuid:ee8dbddc-d45b-41aa-ae89-3a601d135a80	10	13	2	Kibonkho	May 12, 2021	1191	1	60	1191	1	uuid:ee8dbddc-d45b-41aa-ae89-3a601d135a80/household-information[5]	5	5	3	31	2	3		2		1	1	1	2	1	1	2	0	1	4	0	0	1	4	0	1	3		4	8	5	Processed wood	2	3		2	5
May 16, 2021 7:06:05 PM	uuid:ee8dbddc-d45b-41aa-ae89-3a601d135a80	10	13	2	Kibonkho	May 12, 2021	1191	1	60	1191	1	uuid:ee8dbddc-d45b-41aa-ae89-3a601d135a80/household-information[4]	5	4	3	6	2	2		6	student	1	1	1	2	1	1	2	0	1	4	0	0	1	4	0	1	3		4	8	5	Processed wood	2	3		2	5
May 16, 2021 7:06:05 PM	uuid:ee8dbddc-d45b-41aa-ae89-3a601d135a80	10	13	2	Kibonkho	May 12, 2021	1191	1	60	1191	1	uuid:ee8dbddc-d45b-41aa-ae89-3a601d135a80/household-information[1]	5	1	1	60	1	2		3		1	1	1	2	1	1	2	0	1	4	0	0	1	4	0	1	3		4	8	5	Processed wood	2	3		2	5
May 16, 2021 7:06:05 PM	uuid:ee8dbddc-d45b-41aa-ae89-3a601d135a80	10	13	2	Kibonkho	May 12, 2021	1191	1	60	1191	1	uuid:ee8dbddc-d45b-41aa-ae89-3a601d135a80/household-information[2]	5	2	2	58	2	2		3		1	1	1	2	1	1	2	0	1	4	0	0	1	4	0	1	3		4	8	5	Processed wood	2	3		2	5
May 16, 2021 7:01:14 PM	uuid:4d3a7bc6-bdbd-4fba-a678-092f57fd6488	5	11	2	Kibonkho	May 12, 2021	1192	1	70	1192	2	uuid:4d3a7bc6-bdbd-4fba-a678-092f57fd6488/household-information[2]	3	2	3	20	2	2		3		1	2	2	0	1	2	2	1	0	2	0	1	0	2	0	1	3		3	2	2		1	3		2	2
May 16, 2021 7:01:14 PM	uuid:4d3a7bc6-bdbd-4fba-a678-092f57fd6488	5	11	2	Kibonkho	May 12, 2021	1192	1	70	1192	2	uuid:4d3a7bc6-bdbd-4fba-a678-092f57fd6488/household-information[1]	3	1	1	70	2	0		3		1	2	2	0	1	2	2	1	0	2	0	1	0	2	0	1	3		3	2	2		1	3		2	2
May 16, 2021 7:20:25 PM	uuid:1f9e3244-131f-476d-8502-63a6b57db73b	11	14	2	Kibonkho	May 16, 2021	1193	1	24	1193	1	uuid:1f9e3244-131f-476d-8502-63a6b57db73b/household-information[2]	4	2	4	27	1	2		2		2		1	2	1	1	1	1	1	1	0	1	1	1	0	1	3		1	8	2		2	2		2	6
May 16, 2021 7:20:25 PM	uuid:1f9e3244-131f-476d-8502-63a6b57db73b	11	14	2	Kibonkho	May 16, 2021	1193	1	24	1193	1	uuid:1f9e3244-131f-476d-8502-63a6b57db73b/household-information[1]	4	1	1	24	2	2		2		1	1	1	2	1	1	1	1	1	1	0	1	1	1	0	1	3		1	8	2		2	2		2	6
May 16, 2021 7:20:25 PM	uuid:1f9e3244-131f-476d-8502-63a6b57db73b	11	14	2	Kibonkho	May 16, 2021	1193	1	24	1193	1	uuid:1f9e3244-131f-476d-8502-63a6b57db73b/household-information[4]	4	4	3	4	2	0		0		1	1	1	2	1	1	1	1	1	1	0	1	1	1	0	1	3		1	8	2		2	2		2	6
May 16, 2021 7:14:50 PM	uuid:6aa1f184-e62a-43be-aeea-ec84db278ea6	12	15	2	Kibonkho	May 12, 2021	1194	1	28	1194	2	uuid:6aa1f184-e62a-43be-aeea-ec84db278ea6/household-information[3]	3	3	3	2	1	0		0		1	2	1	2	1	1	2	1	0	2	0	0	0	0	0	1	3		4	2	0		1	2		1	2
May 16, 2021 7:14:50 PM	uuid:6aa1f184-e62a-43be-aeea-ec84db278ea6	12	15	2	Kibonkho	May 12, 2021	1194	1	28	1194	2	uuid:6aa1f184-e62a-43be-aeea-ec84db278ea6/household-information[2]	3	2	2	28	2	0		3		1	2	1	2	1	1	2	1	0	2	0	0	0	0	0	1	3		4	2	0		1	2		1	2
May 16, 2021 7:14:50 PM	uuid:6aa1f184-e62a-43be-aeea-ec84db278ea6	12	15	2	Kibonkho	May 12, 2021	1194	1	28	1194	2	uuid:6aa1f184-e62a-43be-aeea-ec84db278ea6/household-information[1]	3	1	1	35	1	2		3		1	2	1	2	1	1	2	1	0	2	0	0	0	0	0	1	3		4	2	0		1	2		1	2
May 16, 2021 7:14:05 PM	uuid:cb2f237f-8771-4637-8f01-e5ec8bd3db08	16	17	2	Kibonkho	May 12, 2021	1195	1	40	1195	1	uuid:cb2f237f-8771-4637-8f01-e5ec8bd3db08/household-information[2]	4	2	3	14	2	3		6	student	1	1	2	0	1	1	2	1	2	1	0	1	2	1	0	1	3		5	3	2		2	2		2	2
May 16, 2021 7:14:05 PM	uuid:cb2f237f-8771-4637-8f01-e5ec8bd3db08	16	17	2	Kibonkho	May 12, 2021	1195	1	40	1195	1	uuid:cb2f237f-8771-4637-8f01-e5ec8bd3db08/household-information[4]	4	4	6	4	1	0		0		1	1	2	0	1	1	2	1	2	1	0	1	2	1	0	1	3		5	3	2		2	2		2	2
May 16, 2021 7:14:05 PM	uuid:cb2f237f-8771-4637-8f01-e5ec8bd3db08	16	17	2	Kibonkho	May 12, 2021	1195	1	40	1195	1	uuid:cb2f237f-8771-4637-8f01-e5ec8bd3db08/household-information[3]	4	3	3	7	2	2		6	student	1	1	2	0	1	1	2	1	2	1	0	1	2	1	0	1	3		5	3	2		2	2		2	2
May 16, 2021 6:57:42 PM	uuid:6d9b818b-05cc-45a5-9d0f-e0c1b9435dbd	7	12	2	Kibonkho	May 12, 2021	1196	1	60	1196	1	uuid:6d9b818b-05cc-45a5-9d0f-e0c1b9435dbd/household-information[1]	4	1	1	60	1	2		3		1	2	1	2	1	1	2	0	0	4	0	0	0	0	0	1	3		4	4	1		2	2		2	2
May 16, 2021 6:57:42 PM	uuid:6d9b818b-05cc-45a5-9d0f-e0c1b9435dbd	7	12	2	Kibonkho	May 12, 2021	1196	1	60	1196	1	uuid:6d9b818b-05cc-45a5-9d0f-e0c1b9435dbd/household-information[4]	4	4	6	18	1	0		0		1	2	1	2	1	1	2	0	0	4	0	0	0	0	0	1	3		4	4	1		2	2		2	2
May 16, 2021 6:57:42 PM	uuid:6d9b818b-05cc-45a5-9d0f-e0c1b9435dbd	7	12	2	Kibonkho	May 12, 2021	1196	1	60	1196	1	uuid:6d9b818b-05cc-45a5-9d0f-e0c1b9435dbd/household-information[3]	4	3	4	85	2	0		0		1	2	1	2	1	1	2	0	0	4	0	0	0	0	0	1	3		4	4	1		2	2		2	2
May 16, 2021 6:57:42 PM	uuid:6d9b818b-05cc-45a5-9d0f-e0c1b9435dbd	7	12	2	Kibonkho	May 12, 2021	1196	1	60	1196	1	uuid:6d9b818b-05cc-45a5-9d0f-e0c1b9435dbd/household-information[2]	4	2	2	56	2	0		3		1	2	1	2	1	1	2	0	0	4	0	0	0	0	0	1	3		4	4	1		2	2		2	2
May 16, 2021 7:14:51 PM	uuid:32bbd2f0-211f-4e19-a159-c1ae65e64f23	12	15	2	Kibonkho	May 12, 2021	1197	1	31	1197	1	uuid:32bbd2f0-211f-4e19-a159-c1ae65e64f23/household-information[1]	4	1	1	31	2	2		2		1	2	1	2	1	1	2	4	2	1	0	0	0	0	0	1	3		4	1	0		1	2		2	2
May 16, 2021 7:14:51 PM	uuid:32bbd2f0-211f-4e19-a159-c1ae65e64f23	12	15	2	Kibonkho	May 12, 2021	1197	1	31	1197	1	uuid:32bbd2f0-211f-4e19-a159-c1ae65e64f23/household-information[3]	4	3	3	4	2	0		0		1	2	1	2	1	1	2	4	2	1	0	0	0	0	0	1	3		4	1	0		1	2		2	2
May 16, 2021 7:14:51 PM	uuid:32bbd2f0-211f-4e19-a159-c1ae65e64f23	12	15	2	Kibonkho	May 12, 2021	1197	1	31	1197	1	uuid:32bbd2f0-211f-4e19-a159-c1ae65e64f23/household-information[2]	4	2	3	8	2	0		0		1	2	1	2	1	1	2	4	2	1	0	0	0	0	0	1	3		4	1	0		1	2		2	2
May 17, 2021 4:12:52 PM	uuid:10306386-80aa-47d5-81c9-796893d6c931	16	17	2	Kibonkho	May 17, 2021	1198	1	43	1198	2	uuid:10306386-80aa-47d5-81c9-796893d6c931/household-information[3]	3	3	3	17	2	3		0		1	1	1	2	1	1	2	0	1	2	0	0	1	2	0	1	3		3	2	1		3	3		2	2
May 17, 2021 4:12:52 PM	uuid:10306386-80aa-47d5-81c9-796893d6c931	16	17	2	Kibonkho	May 17, 2021	1198	1	43	1198	2	uuid:10306386-80aa-47d5-81c9-796893d6c931/household-information[1]	3	1	1	50	1	2		3		1	1	1	2	1	1	2	0	1	2	0	0	1	2	0	1	3		3	2	1		3	3		2	2
May 17, 2021 4:12:52 PM	uuid:10306386-80aa-47d5-81c9-796893d6c931	16	17	2	Kibonkho	May 17, 2021	1198	1	43	1198	2	uuid:10306386-80aa-47d5-81c9-796893d6c931/household-information[2]	3	2	2	43	2	2		3		1	1	1	2	1	1	2	0	1	2	0	0	1	2	0	1	3		3	2	1		3	3		2	2
May 16, 2021 7:01:15 PM	uuid:84265768-f569-48e6-98ed-ce8542cc9ac1	5	11	2	Kibonkho	May 12, 2021	1199	1	41	1199	1	uuid:84265768-f569-48e6-98ed-ce8542cc9ac1/household-information[1]	2	1	1	41	1	3		3		1	1	1	3	1	1	2	0	0	2	0	0	0	2	0	1	3		4	4	2		1	3		2	2
May 16, 2021 7:06:09 PM	uuid:1caf1c1b-8912-4298-b2c1-be6dc254135c	14	16	2	Kibonkho	May 12, 2021	1200	1	25	1200	1	uuid:1caf1c1b-8912-4298-b2c1-be6dc254135c/household-information[3]	17	3	3	2	2	0		0		1	1	1	2	1	1	2	3	5	8	0	1	0	4	0	1	3		4	13	5	Steel bar & net	2	2		2	5
May 16, 2021 7:06:09 PM	uuid:1caf1c1b-8912-4298-b2c1-be6dc254135c	14	16	2	Kibonkho	May 12, 2021	1200	1	25	1200	1	uuid:1caf1c1b-8912-4298-b2c1-be6dc254135c/household-information[11]	17	11	5	13	1	2		0		1	2	1	2	1	1	2	3	5	8	0	1	0	4	0	1	3		4	13	5	Steel bar & net	2	2		2	5
May 16, 2021 7:06:09 PM	uuid:1caf1c1b-8912-4298-b2c1-be6dc254135c	14	16	2	Kibonkho	May 12, 2021	1200	1	25	1200	1	uuid:1caf1c1b-8912-4298-b2c1-be6dc254135c/household-information[12]	17	12	5	11	1	2		0		2		1	2	1	1	2	3	5	8	0	1	0	4	0	1	3		4	13	5	Steel bar & net	2	2		2	5
May 16, 2021 7:06:09 PM	uuid:1caf1c1b-8912-4298-b2c1-be6dc254135c	14	16	2	Kibonkho	May 12, 2021	1200	1	25	1200	1	uuid:1caf1c1b-8912-4298-b2c1-be6dc254135c/household-information[7]	17	7	5	1	2	0		0		1	1	1	2	1	1	2	3	5	8	0	1	0	4	0	1	3		4	13	5	Steel bar & net	2	2		2	5
May 16, 2021 7:06:09 PM	uuid:1caf1c1b-8912-4298-b2c1-be6dc254135c	14	16	2	Kibonkho	May 12, 2021	1200	1	25	1200	1	uuid:1caf1c1b-8912-4298-b2c1-be6dc254135c/household-information[10]	17	10	5	16	1	2		0		1	2	1	2	1	1	2	3	5	8	0	1	0	4	0	1	3		4	13	5	Steel bar & net	2	2		2	5
May 16, 2021 7:06:09 PM	uuid:1caf1c1b-8912-4298-b2c1-be6dc254135c	14	16	2	Kibonkho	May 12, 2021	1200	1	25	1200	1	uuid:1caf1c1b-8912-4298-b2c1-be6dc254135c/household-information[17]	17	17	4	47	2	2		3		1	2	1	2	1	1	2	3	5	8	0	1	0	4	0	1	3		4	13	5	Steel bar & net	2	2		2	5
May 16, 2021 7:06:09 PM	uuid:1caf1c1b-8912-4298-b2c1-be6dc254135c	14	16	2	Kibonkho	May 12, 2021	1200	1	25	1200	1	uuid:1caf1c1b-8912-4298-b2c1-be6dc254135c/household-information[2]	17	2	2	20	2	2		3		1	1	1	2	1	1	2	3	5	8	0	1	0	4	0	1	3		4	13	5	Steel bar & net	2	2		2	5
May 16, 2021 7:06:09 PM	uuid:1caf1c1b-8912-4298-b2c1-be6dc254135c	14	16	2	Kibonkho	May 12, 2021	1200	1	25	1200	1	uuid:1caf1c1b-8912-4298-b2c1-be6dc254135c/household-information[6]	17	6	5	6	1	1		0		1	1	1	2	1	1	2	3	5	8	0	1	0	4	0	1	3		4	13	5	Steel bar & net	2	2		2	5
May 16, 2021 7:06:09 PM	uuid:1caf1c1b-8912-4298-b2c1-be6dc254135c	14	16	2	Kibonkho	May 12, 2021	1200	1	25	1200	1	uuid:1caf1c1b-8912-4298-b2c1-be6dc254135c/household-information[5]	17	5	4	28	2	2		3		1	1	1	2	1	1	2	3	5	8	0	1	0	4	0	1	3		4	13	5	Steel bar & net	2	2		2	5
May 16, 2021 7:06:09 PM	uuid:1caf1c1b-8912-4298-b2c1-be6dc254135c	14	16	2	Kibonkho	May 12, 2021	1200	1	25	1200	1	uuid:1caf1c1b-8912-4298-b2c1-be6dc254135c/household-information[4]	17	4	7	29	1	3		3		1	1	1	2	1	1	2	3	5	8	0	1	0	4	0	1	3		4	13	5	Steel bar & net	2	2		2	5
May 16, 2021 7:06:09 PM	uuid:1caf1c1b-8912-4298-b2c1-be6dc254135c	14	16	2	Kibonkho	May 12, 2021	1200	1	25	1200	1	uuid:1caf1c1b-8912-4298-b2c1-be6dc254135c/household-information[16]	17	16	6	1	1	0		0		1	2	1	2	1	1	2	3	5	8	0	1	0	4	0	1	3		4	13	5	Steel bar & net	2	2		2	5
May 16, 2021 7:06:09 PM	uuid:1caf1c1b-8912-4298-b2c1-be6dc254135c	14	16	2	Kibonkho	May 12, 2021	1200	1	25	1200	1	uuid:1caf1c1b-8912-4298-b2c1-be6dc254135c/household-information[13]	17	13	5	16	1	3		0		1	2	1	2	1	1	2	3	5	8	0	1	0	4	0	1	3		4	13	5	Steel bar & net	2	2		2	5
May 16, 2021 7:06:09 PM	uuid:1caf1c1b-8912-4298-b2c1-be6dc254135c	14	16	2	Kibonkho	May 12, 2021	1200	1	25	1200	1	uuid:1caf1c1b-8912-4298-b2c1-be6dc254135c/household-information[9]	17	9	5	14	1	2		0		1	2	1	2	1	1	2	3	5	8	0	1	0	4	0	1	3		4	13	5	Steel bar & net	2	2		2	5
May 16, 2021 7:06:09 PM	uuid:1caf1c1b-8912-4298-b2c1-be6dc254135c	14	16	2	Kibonkho	May 12, 2021	1200	1	25	1200	1	uuid:1caf1c1b-8912-4298-b2c1-be6dc254135c/household-information[15]	17	15	5	20	2	2		3		1	2	1	2	1	1	2	3	5	8	0	1	0	4	0	1	3		4	13	5	Steel bar & net	2	2		2	5
May 16, 2021 7:06:09 PM	uuid:1caf1c1b-8912-4298-b2c1-be6dc254135c	14	16	2	Kibonkho	May 12, 2021	1200	1	25	1200	1	uuid:1caf1c1b-8912-4298-b2c1-be6dc254135c/household-information[1]	17	1	1	25	1	2		3		1	1	1	2	1	1	2	3	5	8	0	1	0	4	0	1	3		4	13	5	Steel bar & net	2	2		2	5
May 16, 2021 7:06:09 PM	uuid:1caf1c1b-8912-4298-b2c1-be6dc254135c	14	16	2	Kibonkho	May 12, 2021	1200	1	25	1200	1	uuid:1caf1c1b-8912-4298-b2c1-be6dc254135c/household-information[8]	17	8	5	19	1	3		0		1	2	1	2	1	1	2	3	5	8	0	1	0	4	0	1	3		4	13	5	Steel bar & net	2	2		2	5
May 16, 2021 7:06:09 PM	uuid:1caf1c1b-8912-4298-b2c1-be6dc254135c	14	16	2	Kibonkho	May 12, 2021	1200	1	25	1200	1	uuid:1caf1c1b-8912-4298-b2c1-be6dc254135c/household-information[14]	17	14	5	25	1	2		3		1	2	1	2	1	1	2	3	5	8	0	1	0	4	0	1	3		4	13	5	Steel bar & net	2	2		2	5
May 17, 2021 3:59:00 PM	uuid:56366d44-aac9-4b60-8c9f-802084e1f011	5	11	2	Kibonkho	May 17, 2021	1201	1	26	1201	3	uuid:56366d44-aac9-4b60-8c9f-802084e1f011/household-information[5]	6	5	6	6	2	1		0		1	1	1	2	1	1	2	1	2	3	0	1	2	3	0	1	3		3	3	0		2	3		2	2
May 17, 2021 3:59:00 PM	uuid:56366d44-aac9-4b60-8c9f-802084e1f011	5	11	2	Kibonkho	May 17, 2021	1201	1	26	1201	3	uuid:56366d44-aac9-4b60-8c9f-802084e1f011/household-information[3]	6	3	3	26	2	3		2		1	1	1	2	1	1	2	1	2	3	0	1	2	3	0	1	3		3	3	0		2	3		2	2
May 17, 2021 3:59:00 PM	uuid:56366d44-aac9-4b60-8c9f-802084e1f011	5	11	2	Kibonkho	May 17, 2021	1201	1	26	1201	3	uuid:56366d44-aac9-4b60-8c9f-802084e1f011/household-information[2]	6	2	4	46	2	2		2		2		1	2	1	1	2	1	2	3	0	1	2	3	0	1	3		3	3	0		2	3		2	2
May 17, 2021 3:59:00 PM	uuid:56366d44-aac9-4b60-8c9f-802084e1f011	5	11	2	Kibonkho	May 17, 2021	1201	1	26	1201	3	uuid:56366d44-aac9-4b60-8c9f-802084e1f011/household-information[6]	6	6	6	1	2	0		0		1	1	1	2	1	1	2	1	2	3	0	1	2	3	0	1	3		3	3	0		2	3		2	2
May 17, 2021 3:59:00 PM	uuid:56366d44-aac9-4b60-8c9f-802084e1f011	5	11	2	Kibonkho	May 17, 2021	1201	1	26	1201	3	uuid:56366d44-aac9-4b60-8c9f-802084e1f011/household-information[1]	6	1	1	68	2	2		3		2		1	2	1	1	2	1	2	3	0	1	2	3	0	1	3		3	3	0		2	3		2	2
May 17, 2021 3:59:00 PM	uuid:56366d44-aac9-4b60-8c9f-802084e1f011	5	11	2	Kibonkho	May 17, 2021	1201	1	26	1201	3	uuid:56366d44-aac9-4b60-8c9f-802084e1f011/household-information[4]	6	4	6	8	2	2		0		1	1	1	2	1	1	2	1	2	3	0	1	2	3	0	1	3		3	3	0		2	3		2	2
May 16, 2021 7:14:06 PM	uuid:c14119ee-fb2a-46f1-83eb-c426a2af4cd6	16	17	2	Kibonkho	May 12, 2021	1202	1	62	1202	2	uuid:c14119ee-fb2a-46f1-83eb-c426a2af4cd6/household-information[1]	5	1	1	64	1	2		3		1	2	1	2	1	1	2	0	3	2	0	0	0	0	0	1	3		3	2	2		2	2		2	2
May 16, 2021 7:14:06 PM	uuid:c14119ee-fb2a-46f1-83eb-c426a2af4cd6	16	17	2	Kibonkho	May 12, 2021	1202	1	62	1202	2	uuid:c14119ee-fb2a-46f1-83eb-c426a2af4cd6/household-information[2]	5	2	2	62	2	1		3		1	2	1	2	1	1	2	0	3	2	0	0	0	0	0	1	3		3	2	2		2	2		2	2
May 16, 2021 7:14:06 PM	uuid:c14119ee-fb2a-46f1-83eb-c426a2af4cd6	16	17	2	Kibonkho	May 12, 2021	1202	1	62	1202	2	uuid:c14119ee-fb2a-46f1-83eb-c426a2af4cd6/household-information[4]	5	4	6	9	2	2		6	student	1	2	1	2	1	1	2	0	3	2	0	0	0	0	0	1	3		3	2	2		2	2		2	2
May 16, 2021 7:14:06 PM	uuid:c14119ee-fb2a-46f1-83eb-c426a2af4cd6	16	17	2	Kibonkho	May 12, 2021	1202	1	62	1202	2	uuid:c14119ee-fb2a-46f1-83eb-c426a2af4cd6/household-information[5]	5	5	6	7	2	2		6	student	1	2	1	2	1	1	2	0	3	2	0	0	0	0	0	1	3		3	2	2		2	2		2	2
May 16, 2021 6:57:43 PM	uuid:2f7b2956-792e-4f02-a64a-52b09bb016d9	2	12	2	Kibonkho	May 12, 2021	1203	1	26	1203	3	uuid:2f7b2956-792e-4f02-a64a-52b09bb016d9/household-information[2]	4	2	3	6	2	0		0		1	1	2	2	1	1	2	2	2	1	0	2	2	1	0	1	3		2	3	1		1	2		2	2
May 16, 2021 6:57:43 PM	uuid:2f7b2956-792e-4f02-a64a-52b09bb016d9	2	12	2	Kibonkho	May 12, 2021	1203	1	26	1203	3	uuid:2f7b2956-792e-4f02-a64a-52b09bb016d9/household-information[3]	4	3	3	3	1	0		0		1	1	2	2	1	1	2	2	2	1	0	2	2	1	0	1	3		2	3	1		1	2		2	2
May 16, 2021 6:57:43 PM	uuid:2f7b2956-792e-4f02-a64a-52b09bb016d9	2	12	2	Kibonkho	May 12, 2021	1203	1	26	1203	3	uuid:2f7b2956-792e-4f02-a64a-52b09bb016d9/household-information[4]	4	4	3	1	1	0		0		1	1	2	2	1	1	2	2	2	1	0	2	2	1	0	1	3		2	3	1		1	2		2	2
May 16, 2021 6:57:43 PM	uuid:2f7b2956-792e-4f02-a64a-52b09bb016d9	2	12	2	Kibonkho	May 12, 2021	1203	1	26	1203	3	uuid:2f7b2956-792e-4f02-a64a-52b09bb016d9/household-information[1]	4	1	1	26	2	2		3		1	1	2	2	1	1	2	2	2	1	0	2	2	1	0	1	3		2	3	1		1	2		2	2
May 17, 2021 4:01:27 PM	uuid:0914ccb2-ae31-49ec-9144-f1f6c49d1d9f	2	12	2	Kibonkho	May 17, 2021	1204	1	22	1204	2	uuid:0914ccb2-ae31-49ec-9144-f1f6c49d1d9f/household-information[2]	5	2	2	22	2	2		3		1	1	1	3	1	1	2	1	2	2	0	1	2	2	0	1	3		1	1	2		1	2		2	2
May 17, 2021 4:01:27 PM	uuid:0914ccb2-ae31-49ec-9144-f1f6c49d1d9f	2	12	2	Kibonkho	May 17, 2021	1204	1	22	1204	2	uuid:0914ccb2-ae31-49ec-9144-f1f6c49d1d9f/household-information[4]	5	4	3	5	2	2		0		1	1	1	3	1	1	2	1	2	2	0	1	2	2	0	1	3		1	1	2		1	2		2	2
May 17, 2021 4:01:27 PM	uuid:0914ccb2-ae31-49ec-9144-f1f6c49d1d9f	2	12	2	Kibonkho	May 17, 2021	1204	1	22	1204	2	uuid:0914ccb2-ae31-49ec-9144-f1f6c49d1d9f/household-information[5]	5	5	3	1	2	0		0		1	1	1	3	1	1	2	1	2	2	0	1	2	2	0	1	3		1	1	2		1	2		2	2
May 17, 2021 4:01:27 PM	uuid:0914ccb2-ae31-49ec-9144-f1f6c49d1d9f	2	12	2	Kibonkho	May 17, 2021	1204	1	22	1204	2	uuid:0914ccb2-ae31-49ec-9144-f1f6c49d1d9f/household-information[1]	5	1	1	33	1	3		3		1	1	1	3	1	1	2	1	2	2	0	1	2	2	0	1	3		1	1	2		1	2		2	2
May 17, 2021 4:03:49 PM	uuid:4147d130-a313-45ee-b610-c6915c24dffc	9	13	2	Kibonkho	May 17, 2021	1205	1	63	1205	1	uuid:4147d130-a313-45ee-b610-c6915c24dffc/household-information[4]	4	4	6	6	2	2		6	student	1	1	1	2	2	2	2	0	1	3	0	0	1	3	0	2	3		3	1	5	steel bar	1	3		2	2
May 17, 2021 4:03:49 PM	uuid:4147d130-a313-45ee-b610-c6915c24dffc	9	13	2	Kibonkho	May 17, 2021	1205	1	63	1205	1	uuid:4147d130-a313-45ee-b610-c6915c24dffc/household-information[3]	4	3	3	19	2	3		0		1	1	1	2	2	2	2	0	1	3	0	0	1	3	0	1	3		4	2	2		2	3		2	2
May 17, 2021 4:03:49 PM	uuid:4147d130-a313-45ee-b610-c6915c24dffc	9	13	2	Kibonkho	May 17, 2021	1205	1	63	1205	1	uuid:4147d130-a313-45ee-b610-c6915c24dffc/household-information[1]	4	1	1	63	1	2		3		1	1	1	2	2	2	2	0	1	3	0	0	1	3	0	2	3		3	1	5	steel bar	1	3		2	2
May 16, 2021 7:14:52 PM	uuid:aeb83694-0ed4-4636-8675-65c247909339	12	15	2	Kibonkho	May 12, 2021	1206	1	67	1206	1	uuid:aeb83694-0ed4-4636-8675-65c247909339/household-information[1]	2	1	1	67	1	2		3		1	1	1	2	1	1	2	0	0	2	0	0	0	2	0	1	3		4	6	5	Net	2	2		2	5
May 16, 2021 7:14:52 PM	uuid:aeb83694-0ed4-4636-8675-65c247909339	12	15	2	Kibonkho	May 12, 2021	1206	1	67	1206	1	uuid:aeb83694-0ed4-4636-8675-65c247909339/household-information[2]	2	2	2	67	2	2		3		1	1	1	2	1	1	2	0	0	2	0	0	0	2	0	1	3		4	6	5	Net	2	2		2	5
May 16, 2021 7:20:27 PM	uuid:e3d43e3b-f4ae-4f36-b3f7-1e1abb21b1ca	4	14	2	Kibonkho	May 16, 2021	1207	1	30	1207	2	uuid:e3d43e3b-f4ae-4f36-b3f7-1e1abb21b1ca/household-information[2]	3	2	4	30	1	2		1		1	1	1	2	1	1	1	1	0	2	0	1	0	2	0	1	3		4	1	2		1	2		2	5
May 16, 2021 7:20:27 PM	uuid:e3d43e3b-f4ae-4f36-b3f7-1e1abb21b1ca	4	14	2	Kibonkho	May 16, 2021	1207	1	30	1207	2	uuid:e3d43e3b-f4ae-4f36-b3f7-1e1abb21b1ca/household-information[3]	3	3	3	3	2	0		0		2		1	2	1	1	1	1	0	2	0	1	0	2	0	1	3		4	1	2		1	2		2	5
May 16, 2021 7:20:27 PM	uuid:e3d43e3b-f4ae-4f36-b3f7-1e1abb21b1ca	4	14	2	Kibonkho	May 16, 2021	1207	1	30	1207	2	uuid:e3d43e3b-f4ae-4f36-b3f7-1e1abb21b1ca/household-information[1]	3	1	1	21	2	2		2		1	1	1	2	1	2	1	1	0	2	0	1	0	2	0	1	3		4	1	2		1	2		2	5
May 17, 2021 4:12:52 PM	uuid:68a6a6cd-2cc9-4575-bcc0-7f33b5484446	6	17	2	Kibonkho	May 17, 2021	1208	1	40	1208	1	uuid:68a6a6cd-2cc9-4575-bcc0-7f33b5484446/household-information[2]	3	2	4	21	2	2		0		1	1	1	2	1	1	2	1	0	2	0	1	0	2	0	1	3		4	8	2		2	2		2	2
May 17, 2021 4:12:52 PM	uuid:68a6a6cd-2cc9-4575-bcc0-7f33b5484446	6	17	2	Kibonkho	May 17, 2021	1208	1	40	1208	1	uuid:68a6a6cd-2cc9-4575-bcc0-7f33b5484446/household-information[1]	3	1	1	40	1	2		3		1	2	1	2	1	1	2	1	0	2	0	1	0	2	0	1	3		4	8	2		2	2		2	2
May 17, 2021 4:12:51 PM	uuid:9512a14d-d531-428a-83dd-c3276b5bfe43	6	17	2	Kibonkho	May 17, 2021	1209	1	33	1209	1	uuid:9512a14d-d531-428a-83dd-c3276b5bfe43/household-information[3]	5	3	3	9	2	2		0		1	1	1	2	1	1	2	1	2	2	0	1	2	2	0	1	3		2	1	2		1	2		2	2
May 17, 2021 4:12:51 PM	uuid:9512a14d-d531-428a-83dd-c3276b5bfe43	6	17	2	Kibonkho	May 17, 2021	1209	1	33	1209	1	uuid:9512a14d-d531-428a-83dd-c3276b5bfe43/household-information[1]	5	1	1	33	1	2		4		1	1	1	2	1	1	2	1	2	2	0	1	2	2	0	1	3		2	1	2		1	2		2	2
May 17, 2021 4:12:51 PM	uuid:9512a14d-d531-428a-83dd-c3276b5bfe43	6	17	2	Kibonkho	May 17, 2021	1209	1	33	1209	1	uuid:9512a14d-d531-428a-83dd-c3276b5bfe43/household-information[4]	5	4	3	6	2	2		0		1	1	1	2	1	1	2	1	2	2	0	1	2	2	0	1	3		2	1	2		1	2		2	2
May 17, 2021 4:12:51 PM	uuid:9512a14d-d531-428a-83dd-c3276b5bfe43	6	17	2	Kibonkho	May 17, 2021	1209	1	33	1209	1	uuid:9512a14d-d531-428a-83dd-c3276b5bfe43/household-information[5]	5	5	3	4	1	0		0		1	1	1	2	1	1	2	1	2	2	0	1	2	2	0	1	3		2	1	2		1	2		2	2
May 17, 2021 4:12:51 PM	uuid:9512a14d-d531-428a-83dd-c3276b5bfe43	6	17	2	Kibonkho	May 17, 2021	1209	1	33	1209	1	uuid:9512a14d-d531-428a-83dd-c3276b5bfe43/household-information[2]	5	2	2	31	2	2		4		1	1	1	2	1	1	2	1	2	2	0	1	2	2	0	1	3		2	1	2		1	2		2	2
May 17, 2021 3:59:00 PM	uuid:c723b1dd-bc04-4eb0-b73b-24b294f56459	5	11	2	Kibonkho	May 17, 2021	1210	1	38	1210	1	uuid:c723b1dd-bc04-4eb0-b73b-24b294f56459/household-information[4]	4	4	6	3	1	0		0		1	1	2	0	1	1	2	1	2	1	0	1	2	1	0	1	3		1	2	5	Wire& Net	1	3		2	2
May 17, 2021 3:59:00 PM	uuid:c723b1dd-bc04-4eb0-b73b-24b294f56459	5	11	2	Kibonkho	May 17, 2021	1210	1	38	1210	1	uuid:c723b1dd-bc04-4eb0-b73b-24b294f56459/household-information[1]	4	1	1	38	2	0		3		1	1	2	0	1	1	2	1	2	1	0	1	2	1	0	1	3		1	2	5	Wire& Net	1	3		2	2
May 17, 2021 3:59:00 PM	uuid:c723b1dd-bc04-4eb0-b73b-24b294f56459	5	11	2	Kibonkho	May 17, 2021	1210	1	38	1210	1	uuid:c723b1dd-bc04-4eb0-b73b-24b294f56459/household-information[3]	4	3	3	13	1	2		0		1	2	2	0	1	1	2	1	2	1	0	1	2	1	0	1	3		1	2	5	Wire& Net	1	3		2	2
May 17, 2021 3:59:00 PM	uuid:c723b1dd-bc04-4eb0-b73b-24b294f56459	5	11	2	Kibonkho	May 17, 2021	1210	1	38	1210	1	uuid:c723b1dd-bc04-4eb0-b73b-24b294f56459/household-information[2]	4	2	3	16	2	2		2		2		2	0	1	1	2	1	2	1	0	1	2	1	0	1	3		1	2	5	Wire& Net	1	3		2	2
May 17, 2021 4:01:28 PM	uuid:5f05c4d3-0af0-47a0-a6fe-c2649e6469d2	7	12	2	Kibonkho	May 17, 2021	1211	1	21	1211	3	uuid:5f05c4d3-0af0-47a0-a6fe-c2649e6469d2/household-information[5]	5	5	4	7	1	2		0		1	1	1	3	1	1	2	0	2	3	0	0	2	3	0	1	3		4	2	1		1	2		2	2
May 17, 2021 4:01:28 PM	uuid:5f05c4d3-0af0-47a0-a6fe-c2649e6469d2	7	12	2	Kibonkho	May 17, 2021	1211	1	21	1211	3	uuid:5f05c4d3-0af0-47a0-a6fe-c2649e6469d2/household-information[4]	5	4	5	11	1	2		0		1	1	1	3	1	1	2	0	2	3	0	0	2	3	0	1	3		4	2	1		1	2		2	2
May 17, 2021 4:01:28 PM	uuid:5f05c4d3-0af0-47a0-a6fe-c2649e6469d2	7	12	2	Kibonkho	May 17, 2021	1211	1	21	1211	3	uuid:5f05c4d3-0af0-47a0-a6fe-c2649e6469d2/household-information[2]	5	2	5	21	2	3		3		1	1	1	3	1	1	2	0	2	3	0	0	2	3	0	1	3		4	2	1		1	2		2	2
May 17, 2021 4:01:28 PM	uuid:5f05c4d3-0af0-47a0-a6fe-c2649e6469d2	7	12	2	Kibonkho	May 17, 2021	1211	1	21	1211	3	uuid:5f05c4d3-0af0-47a0-a6fe-c2649e6469d2/household-information[3]	5	3	3	83	2	2		3		1	1	1	3	1	1	2	0	2	3	0	0	2	3	0	1	3		4	2	1		1	2		2	2
May 17, 2021 4:03:50 PM	uuid:74c7780d-b6cc-453f-8a89-b48e1b02928e	10	13	2	Kibonkho	May 17, 2021	1212	1	57	1212	1	uuid:74c7780d-b6cc-453f-8a89-b48e1b02928e/household-information[7]	8	7	3	7	2	2		6	student	1	1	1	2	1	1	2	1	5	2	0	1	5	2	0	1	3		4	6	5	steel bar	2	3		2	6
May 17, 2021 4:03:50 PM	uuid:74c7780d-b6cc-453f-8a89-b48e1b02928e	10	13	2	Kibonkho	May 17, 2021	1212	1	57	1212	1	uuid:74c7780d-b6cc-453f-8a89-b48e1b02928e/household-information[4]	8	4	3	15	2	3		6	student	1	1	1	2	1	1	2	1	5	2	0	1	5	2	0	1	3		4	6	5	steel bar	2	3		2	6
May 17, 2021 4:03:50 PM	uuid:74c7780d-b6cc-453f-8a89-b48e1b02928e	10	13	2	Kibonkho	May 17, 2021	1212	1	57	1212	1	uuid:74c7780d-b6cc-453f-8a89-b48e1b02928e/household-information[1]	8	1	1	57	1	2		3		1	1	1	2	1	1	2	1	5	2	0	1	5	2	0	1	3		4	6	5	steel bar	2	3		2	6
May 17, 2021 4:03:50 PM	uuid:74c7780d-b6cc-453f-8a89-b48e1b02928e	10	13	2	Kibonkho	May 17, 2021	1212	1	57	1212	1	uuid:74c7780d-b6cc-453f-8a89-b48e1b02928e/household-information[3]	8	3	3	17	2	3		6	student	1	1	1	2	1	1	2	1	5	2	0	1	5	2	0	1	3		4	6	5	steel bar	2	3		2	6
May 17, 2021 4:03:50 PM	uuid:74c7780d-b6cc-453f-8a89-b48e1b02928e	10	13	2	Kibonkho	May 17, 2021	1212	1	57	1212	1	uuid:74c7780d-b6cc-453f-8a89-b48e1b02928e/household-information[8]	8	8	3	3	1	0		0		1	1	1	2	1	1	2	1	5	2	0	1	5	2	0	1	3		4	6	5	steel bar	2	3		2	6
May 17, 2021 4:03:50 PM	uuid:74c7780d-b6cc-453f-8a89-b48e1b02928e	10	13	2	Kibonkho	May 17, 2021	1212	1	57	1212	1	uuid:74c7780d-b6cc-453f-8a89-b48e1b02928e/household-information[6]	8	6	3	10	2	2		6	student	1	1	1	2	1	1	2	1	5	2	0	1	5	2	0	1	3		4	6	5	steel bar	2	3		2	6
May 17, 2021 4:03:50 PM	uuid:74c7780d-b6cc-453f-8a89-b48e1b02928e	10	13	2	Kibonkho	May 17, 2021	1212	1	57	1212	1	uuid:74c7780d-b6cc-453f-8a89-b48e1b02928e/household-information[2]	8	2	2	30	2	0		3		1	1	1	2	1	1	2	1	5	2	0	1	5	2	0	1	3		4	6	5	steel bar	2	3		2	6
May 17, 2021 4:03:50 PM	uuid:74c7780d-b6cc-453f-8a89-b48e1b02928e	10	13	2	Kibonkho	May 17, 2021	1212	1	57	1212	1	uuid:74c7780d-b6cc-453f-8a89-b48e1b02928e/household-information[5]	8	5	3	13	2	2		6	student	1	1	1	2	1	1	2	1	5	2	0	1	5	2	0	1	3		4	6	5	steel bar	2	3		2	6
May 17, 2021 4:04:50 PM	uuid:b14d14fb-e9f1-454d-84df-128e3bbc6447	11	14	2	Kibonkho	May 17, 2021	1214	1	43	1214	1	uuid:b14d14fb-e9f1-454d-84df-128e3bbc6447/household-information[1]	4	1	1	43	1	2		1		1	1	1	2	1	1	2	0	1	1	0	0	1	1	0	1	3		4	3	2		1	3		2	6
May 17, 2021 4:04:50 PM	uuid:b14d14fb-e9f1-454d-84df-128e3bbc6447	11	14	2	Kibonkho	May 17, 2021	1214	1	43	1214	1	uuid:b14d14fb-e9f1-454d-84df-128e3bbc6447/household-information[2]	4	2	2	41	2	3		2		2		1	2	1	1	2	0	1	1	0	0	1	1	0	1	3		4	3	2		1	3		2	6
May 17, 2021 4:04:50 PM	uuid:b14d14fb-e9f1-454d-84df-128e3bbc6447	11	14	2	Kibonkho	May 17, 2021	1214	1	43	1214	1	uuid:b14d14fb-e9f1-454d-84df-128e3bbc6447/household-information[4]	4	4	3	7	1	2		0		1	1	1	2	1	1	2	0	1	1	0	0	1	1	0	1	3		4	3	2		1	3		2	6
May 17, 2021 4:04:50 PM	uuid:b14d14fb-e9f1-454d-84df-128e3bbc6447	11	14	2	Kibonkho	May 17, 2021	1214	1	43	1214	1	uuid:b14d14fb-e9f1-454d-84df-128e3bbc6447/household-information[3]	4	3	3	18	2	3		0		2		1	2	1	1	2	0	1	1	0	0	1	1	0	1	3		4	3	2		1	3		2	6
May 17, 2021 4:06:45 PM	uuid:1956beac-8905-4a02-8d0f-7bd4be58480e	13	15	2	Kibonkho	May 17, 2021	1215	1	40	1215	2	uuid:1956beac-8905-4a02-8d0f-7bd4be58480e/household-information[6]	6	6	3	9	2	2		0		1	1	1	2	1	1	2	1	3	2	0	1	3	2	0	1	3		4	2	3		1	2		2	2
May 17, 2021 4:06:45 PM	uuid:1956beac-8905-4a02-8d0f-7bd4be58480e	13	15	2	Kibonkho	May 17, 2021	1215	1	40	1215	2	uuid:1956beac-8905-4a02-8d0f-7bd4be58480e/household-information[5]	6	5	3	12	2	1		0		1	1	1	2	1	1	2	1	3	2	0	1	3	2	0	1	3		4	2	3		1	2		2	2
May 17, 2021 4:06:45 PM	uuid:1956beac-8905-4a02-8d0f-7bd4be58480e	13	15	2	Kibonkho	May 17, 2021	1215	1	40	1215	2	uuid:1956beac-8905-4a02-8d0f-7bd4be58480e/household-information[2]	6	2	2	40	2	2		3		1	1	1	2	1	1	2	1	3	2	0	1	3	2	0	1	3		4	2	3		1	2		2	2
May 17, 2021 4:06:45 PM	uuid:1956beac-8905-4a02-8d0f-7bd4be58480e	13	15	2	Kibonkho	May 17, 2021	1215	1	40	1215	2	uuid:1956beac-8905-4a02-8d0f-7bd4be58480e/household-information[3]	6	3	3	1	2	0		0		1	1	1	2	1	1	2	1	3	2	0	1	3	2	0	1	3		4	2	3		1	2		2	2
May 17, 2021 4:06:45 PM	uuid:1956beac-8905-4a02-8d0f-7bd4be58480e	13	15	2	Kibonkho	May 17, 2021	1215	1	40	1215	2	uuid:1956beac-8905-4a02-8d0f-7bd4be58480e/household-information[1]	6	1	1	43	1	2		3		1	1	1	2	1	1	2	1	3	2	0	1	3	2	0	1	3		4	2	3		1	2		2	2
May 16, 2021 7:06:11 PM	uuid:7c459ebe-8e98-4240-8c3d-95b9eb0f3d40	3	16	2	Kibonkho	May 12, 2021	1216	1	81	1216	1	uuid:7c459ebe-8e98-4240-8c3d-95b9eb0f3d40/household-information[2]	2	2	2	75	2	0		3		1	2	2	0	1	1	2	0	0	2	0	0	0	0	0	1	1		7	5	0		2	1		2	2
May 16, 2021 7:06:11 PM	uuid:7c459ebe-8e98-4240-8c3d-95b9eb0f3d40	3	16	2	Kibonkho	May 12, 2021	1216	1	81	1216	1	uuid:7c459ebe-8e98-4240-8c3d-95b9eb0f3d40/household-information[1]	2	1	1	81	1	0		3		1	2	2	0	1	1	2	0	0	2	0	0	0	0	0	1	1		7	5	0		2	1		2	2
May 17, 2021 3:59:02 PM	uuid:c4ba71a1-041b-493a-8c62-08e42d958313	5	11	2	Kibonkho	May 17, 2021	1217	1	39	1217	1	uuid:c4ba71a1-041b-493a-8c62-08e42d958313/household-information[1]	1	1	1	39	1	2		3		1	1	1	2	1	1	2	0	0	1	0	0	0	1	0	1	3		4	1	2		1	3		2	2
May 17, 2021 4:01:28 PM	uuid:f434e4e8-9344-47fd-91ba-a2e2a4f0515b	2	12	2	Kibonkho	May 17, 2021	1218	1	30	1218	3	uuid:f434e4e8-9344-47fd-91ba-a2e2a4f0515b/household-information[1]	1	1	1	52	1	2		3		1	2	1	2	1	1	2	0	0	1	0	0	0	1	0	1	3		3	1	2		1	2		2	2
May 17, 2021 4:03:52 PM	uuid:77bc98d1-11dc-4e4f-85a0-76dc5f6fe5f0	9	13	2	Kibonkho	May 17, 2021	1219	1	63	1219	1	uuid:77bc98d1-11dc-4e4f-85a0-76dc5f6fe5f0/household-information[1]	4	1	1	63	1	2		3		1	1	1	2	1	1	2	0	2	2	0	0	2	2	0	1	3		4	3	5	Processed wood	2	3		2	2
May 17, 2021 4:03:52 PM	uuid:77bc98d1-11dc-4e4f-85a0-76dc5f6fe5f0	9	13	2	Kibonkho	May 17, 2021	1219	1	63	1219	1	uuid:77bc98d1-11dc-4e4f-85a0-76dc5f6fe5f0/household-information[3]	4	3	6	13	1	2		6	student	1	1	1	2	1	1	2	0	2	2	0	0	2	2	0	1	3		4	3	5	Processed wood	2	3		2	2
May 17, 2021 4:03:52 PM	uuid:77bc98d1-11dc-4e4f-85a0-76dc5f6fe5f0	9	13	2	Kibonkho	May 17, 2021	1219	1	63	1219	1	uuid:77bc98d1-11dc-4e4f-85a0-76dc5f6fe5f0/household-information[2]	4	2	2	62	2	2		3		1	1	1	2	1	1	2	0	2	2	0	0	2	2	0	1	3		4	3	5	Processed wood	2	3		2	2
May 17, 2021 4:03:52 PM	uuid:77bc98d1-11dc-4e4f-85a0-76dc5f6fe5f0	9	13	2	Kibonkho	May 17, 2021	1219	1	63	1219	1	uuid:77bc98d1-11dc-4e4f-85a0-76dc5f6fe5f0/household-information[4]	4	4	6	10	1	2		6	student	1	1	1	2	1	1	2	0	2	2	0	0	2	2	0	1	3		4	3	5	Processed wood	2	3		2	2
May 17, 2021 4:04:51 PM	uuid:e95c31a3-ed92-44a1-a7be-6426e51acf58	4	14	2	Kibonkho	May 17, 2021	1221	1	75	1221	1	uuid:e95c31a3-ed92-44a1-a7be-6426e51acf58/household-information[2]	2	2	3	47	1	2		6	construction worker	2		2	0	1	1	2	0	0	1	0	0	0	1	0	1	3		4	3	1		2	2		2	2
May 17, 2021 4:06:46 PM	uuid:cf9bb6eb-2240-402f-90fa-5ae570d57c2e	13	15	2	Kibonkho	May 17, 2021	1222	1	18	1222	1	uuid:cf9bb6eb-2240-402f-90fa-5ae570d57c2e/household-information[2]	2	2	4	20	1	3		2		1	2	1	2	1	1	2	0	0	2	0	0	0	0	0	1	3		4	2	5	Net	2	2		2	2
May 17, 2021 4:11:04 PM	uuid:4a1684e6-b86b-4828-aab5-57468041c32f	14	16	2	Kibonkho	May 17, 2021	1223	1	52	1223	2	uuid:4a1684e6-b86b-4828-aab5-57468041c32f/household-information[2]	3	2	2	52	2	2		3		1	1	1	2	1	1	2	0	0	3	0	0	0	1	0	1	3		4	2	1		1	2		2	2
May 17, 2021 4:11:04 PM	uuid:4a1684e6-b86b-4828-aab5-57468041c32f	14	16	2	Kibonkho	May 17, 2021	1223	1	52	1223	2	uuid:4a1684e6-b86b-4828-aab5-57468041c32f/household-information[3]	3	3	2	53	2	2		3		2		1	2	1	1	2	0	0	3	0	0	0	1	0	1	3		4	2	1		1	2		2	2
May 17, 2021 3:59:03 PM	uuid:09110424-ab72-404d-9e0a-d3c325493334	5	11	2	Kibonkho	May 17, 2021	1224	1	75	1224	1	uuid:09110424-ab72-404d-9e0a-d3c325493334/household-information[2]	2	2	2	73	2	0		3		1	1	2	0	1	1	2	0	0	2	0	0	0	2	0	1	3		3	1	2		2	2		2	2
May 17, 2021 4:01:29 PM	uuid:8a0bb2d1-0702-4be5-bf2f-c48da1d43a5e	7	12	2	Kibonkho	May 17, 2021	1225	1	62	1225	1	uuid:8a0bb2d1-0702-4be5-bf2f-c48da1d43a5e/household-information[2]	7	2	2	44	2	2		3		1	1	1	2	1	1	2	1	3	3	0	1	0	3	0	1	3		1	4	2		2	2		2	2
May 17, 2021 4:01:29 PM	uuid:8a0bb2d1-0702-4be5-bf2f-c48da1d43a5e	7	12	2	Kibonkho	May 17, 2021	1225	1	62	1225	1	uuid:8a0bb2d1-0702-4be5-bf2f-c48da1d43a5e/household-information[4]	7	4	3	16	1	3		0		1	2	1	2	1	1	2	1	3	3	0	1	0	3	0	1	3		1	4	2		2	2		2	2
May 17, 2021 4:01:29 PM	uuid:8a0bb2d1-0702-4be5-bf2f-c48da1d43a5e	7	12	2	Kibonkho	May 17, 2021	1225	1	62	1225	1	uuid:8a0bb2d1-0702-4be5-bf2f-c48da1d43a5e/household-information[1]	7	1	1	62	1	2		3		1	1	1	2	1	1	2	1	3	3	0	1	0	3	0	1	3		1	4	2		2	2		2	2
May 17, 2021 4:01:29 PM	uuid:8a0bb2d1-0702-4be5-bf2f-c48da1d43a5e	7	12	2	Kibonkho	May 17, 2021	1225	1	62	1225	1	uuid:8a0bb2d1-0702-4be5-bf2f-c48da1d43a5e/household-information[7]	7	7	6	1	2	0		0		1	1	1	2	1	1	2	1	3	3	0	1	0	3	0	1	3		1	4	2		2	2		2	2
May 17, 2021 4:01:29 PM	uuid:8a0bb2d1-0702-4be5-bf2f-c48da1d43a5e	7	12	2	Kibonkho	May 17, 2021	1225	1	62	1225	1	uuid:8a0bb2d1-0702-4be5-bf2f-c48da1d43a5e/household-information[5]	7	5	3	9	1	2		0		1	2	1	2	1	1	2	1	3	3	0	1	0	3	0	1	3		1	4	2		2	2		2	2
May 17, 2021 4:01:29 PM	uuid:8a0bb2d1-0702-4be5-bf2f-c48da1d43a5e	7	12	2	Kibonkho	May 17, 2021	1225	1	62	1225	1	uuid:8a0bb2d1-0702-4be5-bf2f-c48da1d43a5e/household-information[3]	7	3	3	23	2	2		3		1	1	1	2	1	1	2	1	3	3	0	1	0	3	0	1	3		1	4	2		2	2		2	2
May 17, 2021 4:01:29 PM	uuid:8a0bb2d1-0702-4be5-bf2f-c48da1d43a5e	7	12	2	Kibonkho	May 17, 2021	1225	1	62	1225	1	uuid:8a0bb2d1-0702-4be5-bf2f-c48da1d43a5e/household-information[6]	7	6	6	5	2	0		0		1	2	1	2	1	1	2	1	3	3	0	1	0	3	0	1	3		1	4	2		2	2		2	2
May 17, 2021 4:03:53 PM	uuid:161a7943-9bdb-4100-bbd8-dbeaff7f7739	10	13	2	Kibonkho	May 17, 2021	1226	1	49	1226	1	uuid:161a7943-9bdb-4100-bbd8-dbeaff7f7739/household-information[3]	6	3	3	20	1	2		2		1	1	1	2	1	1	2	1	2	3	0	1	2	3	0	1	3		4	4	5	Processed wood	2	5	Processed wood	2	2
May 17, 2021 4:03:53 PM	uuid:161a7943-9bdb-4100-bbd8-dbeaff7f7739	10	13	2	Kibonkho	May 17, 2021	1226	1	49	1226	1	uuid:161a7943-9bdb-4100-bbd8-dbeaff7f7739/household-information[1]	6	1	1	49	1	2		3		1	1	1	2	1	1	2	1	2	3	0	1	2	3	0	1	3		4	4	5	Processed wood	2	5	Processed wood	2	2
May 17, 2021 4:03:53 PM	uuid:161a7943-9bdb-4100-bbd8-dbeaff7f7739	10	13	2	Kibonkho	May 17, 2021	1226	1	49	1226	1	uuid:161a7943-9bdb-4100-bbd8-dbeaff7f7739/household-information[2]	6	2	2	35	2	2		3		1	1	1	2	1	1	2	1	2	3	0	1	2	3	0	1	3		4	4	5	Processed wood	2	5	Processed wood	2	2
May 17, 2021 4:03:53 PM	uuid:161a7943-9bdb-4100-bbd8-dbeaff7f7739	10	13	2	Kibonkho	May 17, 2021	1226	1	49	1226	1	uuid:161a7943-9bdb-4100-bbd8-dbeaff7f7739/household-information[4]	6	4	3	12	2	2		6	student	1	1	1	2	1	1	2	1	2	3	0	1	2	3	0	1	3		4	4	5	Processed wood	2	5	Processed wood	2	2
May 17, 2021 4:03:53 PM	uuid:161a7943-9bdb-4100-bbd8-dbeaff7f7739	10	13	2	Kibonkho	May 17, 2021	1226	1	49	1226	1	uuid:161a7943-9bdb-4100-bbd8-dbeaff7f7739/household-information[6]	6	6	3	5	2	1		6	student	1	1	1	2	1	1	2	1	2	3	0	1	2	3	0	1	3		4	4	5	Processed wood	2	5	Processed wood	2	2
May 17, 2021 4:03:53 PM	uuid:161a7943-9bdb-4100-bbd8-dbeaff7f7739	10	13	2	Kibonkho	May 17, 2021	1226	1	49	1226	1	uuid:161a7943-9bdb-4100-bbd8-dbeaff7f7739/household-information[5]	6	5	3	10	2	2		6	student	1	1	1	2	1	1	2	1	2	3	0	1	2	3	0	1	3		4	4	5	Processed wood	2	5	Processed wood	2	2
May 17, 2021 4:12:55 PM	uuid:0e8dceb6-4d3d-4775-88bb-2723ee4af328	6	17	2	Kibonkho	May 17, 2021	1227	1	18	1227	3	uuid:0e8dceb6-4d3d-4775-88bb-2723ee4af328/household-information[1]	2	1	1	19	1	2		2		1	2	1	2	1	1	2	0	0	2	0	0	0	0	0	1	3		3	3	2		3	2		2	2
May 17, 2021 4:04:51 PM	uuid:745736dc-d05b-4127-bb07-ccbf1c5f69ad	11	14	2	Kibonkho	May 17, 2021	1228	1	80	1228	1	uuid:745736dc-d05b-4127-bb07-ccbf1c5f69ad/household-information[5]	5	5	3	40	2	2		2		1	1	2	0	1	1	2	1	1	3	0	1	1	3	0	1	3		2	5	2		2	2		2	5
May 17, 2021 4:04:51 PM	uuid:745736dc-d05b-4127-bb07-ccbf1c5f69ad	11	14	2	Kibonkho	May 17, 2021	1228	1	80	1228	1	uuid:745736dc-d05b-4127-bb07-ccbf1c5f69ad/household-information[4]	5	4	6	1	2	0		0		1	1	2	0	1	1	2	1	1	3	0	1	1	3	0	1	3		2	5	2		2	2		2	5
May 17, 2021 4:04:51 PM	uuid:745736dc-d05b-4127-bb07-ccbf1c5f69ad	11	14	2	Kibonkho	May 17, 2021	1228	1	80	1228	1	uuid:745736dc-d05b-4127-bb07-ccbf1c5f69ad/household-information[1]	5	1	1	80	2	0		0		1	1	2	0	1	1	2	1	1	3	0	1	1	3	0	1	3		2	5	2		2	2		2	5
May 17, 2021 4:04:51 PM	uuid:745736dc-d05b-4127-bb07-ccbf1c5f69ad	11	14	2	Kibonkho	May 17, 2021	1228	1	80	1228	1	uuid:745736dc-d05b-4127-bb07-ccbf1c5f69ad/household-information[3]	5	3	6	10	1	2		0		1	1	2	0	1	1	2	1	1	3	0	1	1	3	0	1	3		2	5	2		2	2		2	5
May 17, 2021 4:04:51 PM	uuid:745736dc-d05b-4127-bb07-ccbf1c5f69ad	11	14	2	Kibonkho	May 17, 2021	1228	1	80	1228	1	uuid:745736dc-d05b-4127-bb07-ccbf1c5f69ad/household-information[2]	5	2	6	25	1	2		2		1	1	2	0	1	1	2	1	1	3	0	1	1	3	0	1	3		2	5	2		2	2		2	5
May 17, 2021 4:06:47 PM	uuid:fa3a4645-caf9-4079-847a-cfaeeeb898ce	13	15	2	Kibonkho	May 17, 2021	1229	1	60	1229	2	uuid:fa3a4645-caf9-4079-847a-cfaeeeb898ce/household-information[5]	5	5	6	15	1	2		0		1	2	2	0	1	1	2	0	2	3	0	0	0	0	0	1	3		4	2	2		2	2		2	2
May 17, 2021 4:06:47 PM	uuid:fa3a4645-caf9-4079-847a-cfaeeeb898ce	13	15	2	Kibonkho	May 17, 2021	1229	1	60	1229	2	uuid:fa3a4645-caf9-4079-847a-cfaeeeb898ce/household-information[4]	5	4	6	12	1	2		0		1	2	2	0	1	1	2	0	2	3	0	0	0	0	0	1	3		4	2	2		2	2		2	2
May 17, 2021 4:06:47 PM	uuid:fa3a4645-caf9-4079-847a-cfaeeeb898ce	13	15	2	Kibonkho	May 17, 2021	1229	1	60	1229	2	uuid:fa3a4645-caf9-4079-847a-cfaeeeb898ce/household-information[1]	5	1	1	70	1	0		3		1	2	2	0	1	1	2	0	2	3	0	0	0	0	0	1	3		4	2	2		2	2		2	2
May 17, 2021 4:06:47 PM	uuid:fa3a4645-caf9-4079-847a-cfaeeeb898ce	13	15	2	Kibonkho	May 17, 2021	1229	1	60	1229	2	uuid:fa3a4645-caf9-4079-847a-cfaeeeb898ce/household-information[3]	5	3	2	63	2	0		3		1	2	2	0	1	1	2	0	2	3	0	0	0	0	0	1	3		4	2	2		2	2		2	2
May 17, 2021 4:11:05 PM	uuid:70d7230b-ce07-43d9-b138-370b35fdbeca	3	16	2	Kibonkho	May 17, 2021	1230	1	30	1230	3	uuid:70d7230b-ce07-43d9-b138-370b35fdbeca/household-information[1]	2	1	1	30	1	3		3		1	1	1	3	1	1	2	0	0	2	0	0	0	2	0	1	3		2	2	5	Net	1	5	Curtain	2	2
May 17, 2021 3:59:05 PM	uuid:83842769-0e32-45f3-85bd-6b3c5f235047	5	11	2	Kibonkho	May 17, 2021	1231	1	43	1231	2	uuid:83842769-0e32-45f3-85bd-6b3c5f235047/household-information[2]	3	2	2	43	2	2		3		1	1	1	2	1	1	2	0	0	3	0	0	0	3	0	1	3		1	4	2		2	3		2	2
May 17, 2021 3:59:05 PM	uuid:83842769-0e32-45f3-85bd-6b3c5f235047	5	11	2	Kibonkho	May 17, 2021	1231	1	43	1231	2	uuid:83842769-0e32-45f3-85bd-6b3c5f235047/household-information[1]	3	1	1	57	1	2		3		1	1	1	2	1	1	2	0	0	3	0	0	0	3	0	1	3		1	4	2		2	3		2	2
May 17, 2021 4:01:30 PM	uuid:cc108c5b-0853-42d4-9977-bc7972df5605	2	12	2	Kibonkho	May 17, 2021	1232	1	30	1232	3	uuid:cc108c5b-0853-42d4-9977-bc7972df5605/household-information[3]	5	3	6	16	2	2		0		1	1	1	0	1	1	2	1	3	2	0	1	2	2	0	1	3		3	1	2		1	2		2	5
May 17, 2021 4:01:30 PM	uuid:cc108c5b-0853-42d4-9977-bc7972df5605	2	12	2	Kibonkho	May 17, 2021	1232	1	30	1232	3	uuid:cc108c5b-0853-42d4-9977-bc7972df5605/household-information[4]	5	4	6	10	1	2		0		1	1	1	0	1	1	2	1	3	2	0	1	2	2	0	1	3		3	1	2		1	2		2	5
May 17, 2021 4:01:30 PM	uuid:cc108c5b-0853-42d4-9977-bc7972df5605	2	12	2	Kibonkho	May 17, 2021	1232	1	30	1232	3	uuid:cc108c5b-0853-42d4-9977-bc7972df5605/household-information[2]	5	2	3	30	2	3		3		1	1	1	0	1	1	2	1	3	2	0	1	2	2	0	1	3		3	1	2		1	2		2	5
May 17, 2021 4:01:30 PM	uuid:cc108c5b-0853-42d4-9977-bc7972df5605	2	12	2	Kibonkho	May 17, 2021	1232	1	30	1232	3	uuid:cc108c5b-0853-42d4-9977-bc7972df5605/household-information[5]	5	5	6	4	2	0		0		1	1	1	0	1	1	2	1	3	2	0	1	2	2	0	1	3		3	1	2		1	2		2	5
May 17, 2021 4:03:55 PM	uuid:dd70980d-2bd0-492e-ac60-bf9990977da4	9	13	2	Kibonkho	May 17, 2021	1233	1	35	1233	1	uuid:dd70980d-2bd0-492e-ac60-bf9990977da4/household-information[1]	2	1	1	35	1	2		6	Technician	1	1	1	2	1	1	2	0	0	2	0	0	0	2	0	1	3		4	5	5	steel bar	2	5	Processed wood	2	2
May 17, 2021 4:03:55 PM	uuid:dd70980d-2bd0-492e-ac60-bf9990977da4	9	13	2	Kibonkho	May 17, 2021	1233	1	35	1233	1	uuid:dd70980d-2bd0-492e-ac60-bf9990977da4/household-information[2]	2	2	2	30	2	2		3		1	1	1	2	1	1	2	0	0	2	0	0	0	2	0	1	3		4	5	5	steel bar	2	5	Processed wood	2	2
May 17, 2021 4:12:56 PM	uuid:8de8b9c9-6ffd-4194-98fc-d4a65f5a552f	16	17	2	Kibonkho	May 17, 2021	1234	1	61	1234	2	uuid:8de8b9c9-6ffd-4194-98fc-d4a65f5a552f/household-information[2]	12	2	2	61	2	2		3		1	2	1	2	2	1	2	1	4	7	0	0	0	0	0	1	3		4	2	2		1	2		2	2
May 17, 2021 4:12:56 PM	uuid:8de8b9c9-6ffd-4194-98fc-d4a65f5a552f	16	17	2	Kibonkho	May 17, 2021	1234	1	61	1234	2	uuid:8de8b9c9-6ffd-4194-98fc-d4a65f5a552f/household-information[1]	12	1	1	61	1	2		3		1	2	1	2	2	1	2	1	4	7	0	0	0	0	0	1	3		4	2	2		1	2		2	2
May 17, 2021 4:12:56 PM	uuid:8de8b9c9-6ffd-4194-98fc-d4a65f5a552f	16	17	2	Kibonkho	May 17, 2021	1234	1	61	1234	2	uuid:8de8b9c9-6ffd-4194-98fc-d4a65f5a552f/household-information[10]	12	10	6	10	1	2		6	student	1	2	1	2	2	1	2	1	4	7	0	0	0	0	0	1	3		4	2	2		1	2		2	2
May 17, 2021 4:12:56 PM	uuid:8de8b9c9-6ffd-4194-98fc-d4a65f5a552f	16	17	2	Kibonkho	May 17, 2021	1234	1	61	1234	2	uuid:8de8b9c9-6ffd-4194-98fc-d4a65f5a552f/household-information[4]	12	4	3	26	1	2		3		1	2	1	2	2	1	2	1	4	7	0	0	0	0	0	2	3		1	2	2		2	3		2	2
May 17, 2021 4:12:56 PM	uuid:8de8b9c9-6ffd-4194-98fc-d4a65f5a552f	16	17	2	Kibonkho	May 17, 2021	1234	1	61	1234	2	uuid:8de8b9c9-6ffd-4194-98fc-d4a65f5a552f/household-information[12]	12	12	6	2	2	0		0		1	2	1	2	2	1	2	1	4	7	0	0	0	0	0	1	3		4	2	2		1	2		2	2
May 17, 2021 4:12:56 PM	uuid:8de8b9c9-6ffd-4194-98fc-d4a65f5a552f	16	17	2	Kibonkho	May 17, 2021	1234	1	61	1234	2	uuid:8de8b9c9-6ffd-4194-98fc-d4a65f5a552f/household-information[11]	12	11	6	7	2	2		6	student	1	2	1	2	2	1	2	1	4	7	0	0	0	0	0	1	3		4	2	2		1	2		2	2
May 17, 2021 4:12:56 PM	uuid:8de8b9c9-6ffd-4194-98fc-d4a65f5a552f	16	17	2	Kibonkho	May 17, 2021	1234	1	61	1234	2	uuid:8de8b9c9-6ffd-4194-98fc-d4a65f5a552f/household-information[7]	12	7	6	8	2	2		6	student	1	2	1	2	2	1	2	1	4	7	0	0	0	0	0	1	3		4	2	2		1	2		2	2
May 17, 2021 4:12:56 PM	uuid:8de8b9c9-6ffd-4194-98fc-d4a65f5a552f	16	17	2	Kibonkho	May 17, 2021	1234	1	61	1234	2	uuid:8de8b9c9-6ffd-4194-98fc-d4a65f5a552f/household-information[3]	12	3	3	20	2	2		2		1	2	1	2	2	1	2	1	4	7	0	0	0	0	0	1	3		4	2	2		1	2		2	2
May 17, 2021 4:12:56 PM	uuid:8de8b9c9-6ffd-4194-98fc-d4a65f5a552f	16	17	2	Kibonkho	May 17, 2021	1234	1	61	1234	2	uuid:8de8b9c9-6ffd-4194-98fc-d4a65f5a552f/household-information[6]	12	6	3	18	1	3		0		1	2	1	2	2	1	2	1	4	7	0	0	0	0	0	1	3		4	2	2		1	2		2	2
May 17, 2021 4:12:56 PM	uuid:8de8b9c9-6ffd-4194-98fc-d4a65f5a552f	16	17	2	Kibonkho	May 17, 2021	1234	1	61	1234	2	uuid:8de8b9c9-6ffd-4194-98fc-d4a65f5a552f/household-information[8]	12	8	3	22	1	2		3		1	2	1	2	2	1	2	1	4	7	0	0	0	0	0	1	3		4	2	2		1	2		2	2
May 17, 2021 4:12:56 PM	uuid:8de8b9c9-6ffd-4194-98fc-d4a65f5a552f	16	17	2	Kibonkho	May 17, 2021	1234	1	61	1234	2	uuid:8de8b9c9-6ffd-4194-98fc-d4a65f5a552f/household-information[5]	12	5	3	17	1	3		6	student	1	2	1	2	2	1	2	1	4	7	0	0	0	0	0	1	3		4	2	2		1	2		2	2
May 17, 2021 4:12:56 PM	uuid:8de8b9c9-6ffd-4194-98fc-d4a65f5a552f	16	17	2	Kibonkho	May 17, 2021	1234	1	61	1234	2	uuid:8de8b9c9-6ffd-4194-98fc-d4a65f5a552f/household-information[9]	12	9	3	20	2	2		3		1	2	1	2	2	2	2	1	4	7	0	0	0	0	0	1	3		4	2	2		1	2		2	2
May 17, 2021 4:04:53 PM	uuid:caf47003-8eb9-41e1-96e6-82ba5d4e9017	4	14	2	Kibonkho	May 17, 2021	1235	1	40	1235	1	uuid:caf47003-8eb9-41e1-96e6-82ba5d4e9017/household-information[2]	2	2	9	25	2	3		2		1	1	1	2	1	1	2	0	0	2	0	0	0	2	0	1	3		4	4	2		2	2		2	5
May 17, 2021 4:06:48 PM	uuid:22f6fadb-951c-4586-af1f-67a4b06cebaa	13	15	2	Kibonkho	May 17, 2021	1236	1	30	1236	1	uuid:22f6fadb-951c-4586-af1f-67a4b06cebaa/household-information[2]	2	2	2	25	2	2		2		1	1	1	3	1	1	2	0	0	2	0	0	0	2	0	1	3		4	2	5	Net	1	2		2	2
May 17, 2021 4:06:48 PM	uuid:22f6fadb-951c-4586-af1f-67a4b06cebaa	13	15	2	Kibonkho	May 17, 2021	1236	1	30	1236	1	uuid:22f6fadb-951c-4586-af1f-67a4b06cebaa/household-information[1]	2	1	1	30	1	3		2		1	1	1	3	1	1	2	0	0	2	0	0	0	2	0	1	3		4	2	5	Net	1	2		2	2
May 17, 2021 4:11:06 PM	uuid:6f7a41d8-93f1-47af-9693-4f07f9a54dab	3	16	2	Kibonkho	May 17, 2021	1237	1	51	1237	1	uuid:6f7a41d8-93f1-47af-9693-4f07f9a54dab/household-information[7]	8	7	6	5	2	0		0		1	1	1	2	1	1	2	0	5	3	0	0	5	3	0	1	3		1	3	1		2	2		2	2
May 17, 2021 4:11:06 PM	uuid:6f7a41d8-93f1-47af-9693-4f07f9a54dab	3	16	2	Kibonkho	May 17, 2021	1237	1	51	1237	1	uuid:6f7a41d8-93f1-47af-9693-4f07f9a54dab/household-information[4]	8	4	3	12	2	2		0		1	1	1	2	1	1	2	0	5	3	0	0	5	3	0	1	3		1	3	1		2	2		2	2
May 17, 2021 4:11:06 PM	uuid:6f7a41d8-93f1-47af-9693-4f07f9a54dab	3	16	2	Kibonkho	May 17, 2021	1237	1	51	1237	1	uuid:6f7a41d8-93f1-47af-9693-4f07f9a54dab/household-information[2]	8	2	2	45	2	2		3		1	1	1	2	1	1	2	0	5	3	0	0	5	3	0	1	3		1	3	1		2	2		2	2
May 17, 2021 4:11:06 PM	uuid:6f7a41d8-93f1-47af-9693-4f07f9a54dab	3	16	2	Kibonkho	May 17, 2021	1237	1	51	1237	1	uuid:6f7a41d8-93f1-47af-9693-4f07f9a54dab/household-information[5]	8	5	6	9	2	2		0		1	1	1	2	1	1	2	0	5	3	0	0	5	3	0	1	3		1	3	1		2	2		2	2
May 17, 2021 4:11:06 PM	uuid:6f7a41d8-93f1-47af-9693-4f07f9a54dab	3	16	2	Kibonkho	May 17, 2021	1237	1	51	1237	1	uuid:6f7a41d8-93f1-47af-9693-4f07f9a54dab/household-information[6]	8	6	6	6	2	2		0		1	1	1	2	1	1	2	0	5	3	0	0	5	3	0	1	3		1	3	1		2	2		2	2
May 17, 2021 4:11:06 PM	uuid:6f7a41d8-93f1-47af-9693-4f07f9a54dab	3	16	2	Kibonkho	May 17, 2021	1237	1	51	1237	1	uuid:6f7a41d8-93f1-47af-9693-4f07f9a54dab/household-information[8]	8	8	6	5	1	0		0		1	1	1	2	1	1	2	0	5	3	0	0	5	3	0	1	3		1	3	1		2	2		2	2
May 17, 2021 4:11:06 PM	uuid:6f7a41d8-93f1-47af-9693-4f07f9a54dab	3	16	2	Kibonkho	May 17, 2021	1237	1	51	1237	1	uuid:6f7a41d8-93f1-47af-9693-4f07f9a54dab/household-information[3]	8	3	3	22	1	3		0		1	2	1	2	1	1	2	0	5	3	0	0	5	3	0	1	3		1	3	1		2	2		2	2
May 17, 2021 3:59:12 PM	uuid:a0f52cf4-a9aa-4de1-a107-beab6d0521d0	1	11	2	Kibonkho	May 17, 2021	1238	1	23	1238	2	uuid:a0f52cf4-a9aa-4de1-a107-beab6d0521d0/household-information[3]	4	3	3	14	1	3		0		1	1	1	2	1	1	2	0	2	2	1	0	2	2	1	1	3		4	2	2		1	2		2	5
May 17, 2021 3:59:12 PM	uuid:a0f52cf4-a9aa-4de1-a107-beab6d0521d0	1	11	2	Kibonkho	May 17, 2021	1238	1	23	1238	2	uuid:a0f52cf4-a9aa-4de1-a107-beab6d0521d0/household-information[4]	4	4	3	9	1	2		0		1	1	1	2	1	1	2	0	2	2	1	0	2	2	1	1	3		4	2	2		1	2		2	5
May 17, 2021 3:59:12 PM	uuid:a0f52cf4-a9aa-4de1-a107-beab6d0521d0	1	11	2	Kibonkho	May 17, 2021	1238	1	23	1238	2	uuid:a0f52cf4-a9aa-4de1-a107-beab6d0521d0/household-information[2]	4	2	2	23	2	2		2		1	1	1	2	1	1	2	0	2	2	1	0	2	2	1	1	3		4	2	2		1	2		2	5
May 17, 2021 3:59:12 PM	uuid:a0f52cf4-a9aa-4de1-a107-beab6d0521d0	1	11	2	Kibonkho	May 17, 2021	1238	1	23	1238	2	uuid:a0f52cf4-a9aa-4de1-a107-beab6d0521d0/household-information[1]	4	1	1	36	1	2		5		1	1	1	2	1	1	2	0	2	2	1	0	2	2	1	1	3		4	2	2		1	2		2	5
May 17, 2021 4:01:31 PM	uuid:22878741-3362-4f3f-ad46-78174c1f8578	7	12	2	Kibonkho	May 17, 2021	1239	1	45	1239	2	uuid:22878741-3362-4f3f-ad46-78174c1f8578/household-information[6]	8	6	3	13	2	2		0		1	1	1	0	1	1	2	2	1	4	0	2	1	4	0	1	3		4	4	2		1	2		2	2
May 17, 2021 4:01:31 PM	uuid:22878741-3362-4f3f-ad46-78174c1f8578	7	12	2	Kibonkho	May 17, 2021	1239	1	45	1239	2	uuid:22878741-3362-4f3f-ad46-78174c1f8578/household-information[5]	8	5	3	19	2	3		0		1	1	1	0	1	1	2	2	1	4	0	2	1	4	0	1	3		4	4	2		1	2		2	2
May 17, 2021 4:01:31 PM	uuid:22878741-3362-4f3f-ad46-78174c1f8578	7	12	2	Kibonkho	May 17, 2021	1239	1	45	1239	2	uuid:22878741-3362-4f3f-ad46-78174c1f8578/household-information[4]	8	4	3	21	2	2		3		1	1	1	0	1	1	2	2	1	4	0	2	1	4	0	1	3		4	4	2		1	2		2	2
May 17, 2021 4:01:31 PM	uuid:22878741-3362-4f3f-ad46-78174c1f8578	7	12	2	Kibonkho	May 17, 2021	1239	1	45	1239	2	uuid:22878741-3362-4f3f-ad46-78174c1f8578/household-information[8]	8	8	6	1	1	0		0		1	1	1	0	1	1	2	2	1	4	0	2	1	4	0	1	3		4	4	2		1	2		2	2
May 17, 2021 4:01:31 PM	uuid:22878741-3362-4f3f-ad46-78174c1f8578	7	12	2	Kibonkho	May 17, 2021	1239	1	45	1239	2	uuid:22878741-3362-4f3f-ad46-78174c1f8578/household-information[2]	8	2	2	45	2	0		3		1	1	1	0	1	1	2	2	1	4	0	2	1	4	0	1	3		4	4	2		1	2		2	2
May 17, 2021 4:01:31 PM	uuid:22878741-3362-4f3f-ad46-78174c1f8578	7	12	2	Kibonkho	May 17, 2021	1239	1	45	1239	2	uuid:22878741-3362-4f3f-ad46-78174c1f8578/household-information[1]	8	1	1	63	1	0		3		1	1	1	0	1	1	2	2	1	4	0	2	1	4	0	1	3		4	4	2		1	2		2	2
May 17, 2021 4:01:31 PM	uuid:22878741-3362-4f3f-ad46-78174c1f8578	7	12	2	Kibonkho	May 17, 2021	1239	1	45	1239	2	uuid:22878741-3362-4f3f-ad46-78174c1f8578/household-information[7]	8	7	6	3	2	2		0		1	1	1	0	1	1	2	2	1	4	0	2	1	4	0	1	3		4	4	2		1	2		2	2
May 17, 2021 4:03:56 PM	uuid:65b69581-f785-43c9-a28c-65289b35fdc8	10	13	2	Kibonkho	May 17, 2021	1240	1	64	1240	1	uuid:65b69581-f785-43c9-a28c-65289b35fdc8/household-information[4]	7	4	3	20	2	2		3		1	1	1	2	1	1	2	1	2	4	0	1	2	4	0	1	3		4	5	5	Net	2	3		2	2
May 17, 2021 4:03:56 PM	uuid:65b69581-f785-43c9-a28c-65289b35fdc8	10	13	2	Kibonkho	May 17, 2021	1240	1	64	1240	1	uuid:65b69581-f785-43c9-a28c-65289b35fdc8/household-information[2]	7	2	3	35	1	2		1		1	1	1	2	1	1	2	1	2	4	0	1	2	4	0	1	3		4	5	5	Net	2	3		2	2
May 17, 2021 4:03:56 PM	uuid:65b69581-f785-43c9-a28c-65289b35fdc8	10	13	2	Kibonkho	May 17, 2021	1240	1	64	1240	1	uuid:65b69581-f785-43c9-a28c-65289b35fdc8/household-information[1]	7	1	1	64	2	2		3		1	1	1	2	1	1	2	1	2	4	0	1	2	4	0	1	3		4	5	5	Net	2	3		2	2
May 17, 2021 4:03:56 PM	uuid:65b69581-f785-43c9-a28c-65289b35fdc8	10	13	2	Kibonkho	May 17, 2021	1240	1	64	1240	1	uuid:65b69581-f785-43c9-a28c-65289b35fdc8/household-information[5]	7	5	6	13	1	2		6	student	1	1	1	2	1	1	2	1	2	4	0	1	2	4	0	1	3		4	5	5	Net	2	3		2	2
May 17, 2021 4:03:56 PM	uuid:65b69581-f785-43c9-a28c-65289b35fdc8	10	13	2	Kibonkho	May 17, 2021	1240	1	64	1240	1	uuid:65b69581-f785-43c9-a28c-65289b35fdc8/household-information[3]	7	3	3	37	1	2		2		1	1	1	2	1	1	2	1	2	4	0	1	2	4	0	1	3		4	5	5	Net	2	3		2	2
May 17, 2021 4:03:56 PM	uuid:65b69581-f785-43c9-a28c-65289b35fdc8	10	13	2	Kibonkho	May 17, 2021	1240	1	64	1240	1	uuid:65b69581-f785-43c9-a28c-65289b35fdc8/household-information[7]	7	7	6	2	2	0		0		1	1	1	2	1	1	2	1	2	4	0	1	2	4	0	1	3		4	5	5	Net	2	3		2	2
May 17, 2021 4:01:34 PM	uuid:85351a4f-d9f9-431e-85e5-f808f42e6318	7	12	2	Kibonkho	May 17, 2021	1241	1	23	1241	3	uuid:85351a4f-d9f9-431e-85e5-f808f42e6318/household-information[4]	9	4	6	11	1	2		0		1	1	1	2	1	1	2	0	6	3	0	0	6	3	0	1	3		3	2	2		2	2		2	2
May 17, 2021 4:01:34 PM	uuid:85351a4f-d9f9-431e-85e5-f808f42e6318	7	12	2	Kibonkho	May 17, 2021	1241	1	23	1241	3	uuid:85351a4f-d9f9-431e-85e5-f808f42e6318/household-information[8]	9	8	6	9	1	2		0		1	1	1	2	1	1	2	0	6	3	0	0	6	3	0	1	3		3	2	2		2	2		2	2
May 17, 2021 4:01:34 PM	uuid:85351a4f-d9f9-431e-85e5-f808f42e6318	7	12	2	Kibonkho	May 17, 2021	1241	1	23	1241	3	uuid:85351a4f-d9f9-431e-85e5-f808f42e6318/household-information[7]	9	7	6	9	2	2		0		1	1	1	2	1	1	2	0	6	3	0	0	6	3	0	1	3		3	2	2		2	2		2	2
May 17, 2021 4:01:34 PM	uuid:85351a4f-d9f9-431e-85e5-f808f42e6318	7	12	2	Kibonkho	May 17, 2021	1241	1	23	1241	3	uuid:85351a4f-d9f9-431e-85e5-f808f42e6318/household-information[3]	9	3	1	45	1	2		3		1	1	1	2	1	1	2	0	6	3	0	0	6	3	0	1	3		3	2	2		2	2		2	2
May 17, 2021 4:01:34 PM	uuid:85351a4f-d9f9-431e-85e5-f808f42e6318	7	12	2	Kibonkho	May 17, 2021	1241	1	23	1241	3	uuid:85351a4f-d9f9-431e-85e5-f808f42e6318/household-information[5]	9	5	6	12	2	2		0		1	1	1	2	1	1	2	0	6	3	0	0	6	3	0	1	3		3	2	2		2	2		2	2
May 17, 2021 4:01:34 PM	uuid:85351a4f-d9f9-431e-85e5-f808f42e6318	7	12	2	Kibonkho	May 17, 2021	1241	1	23	1241	3	uuid:85351a4f-d9f9-431e-85e5-f808f42e6318/household-information[2]	9	2	2	23	2	3		3		1	1	1	2	1	1	2	0	6	3	0	0	6	3	0	1	3		3	2	2		2	2		2	2
May 17, 2021 4:01:34 PM	uuid:85351a4f-d9f9-431e-85e5-f808f42e6318	7	12	2	Kibonkho	May 17, 2021	1241	1	23	1241	3	uuid:85351a4f-d9f9-431e-85e5-f808f42e6318/household-information[1]	9	1	2	37	2	2		3		1	1	1	2	1	1	2	0	6	3	0	0	6	3	0	1	3		3	2	2		2	2		2	2
May 17, 2021 4:01:34 PM	uuid:85351a4f-d9f9-431e-85e5-f808f42e6318	7	12	2	Kibonkho	May 17, 2021	1241	1	23	1241	3	uuid:85351a4f-d9f9-431e-85e5-f808f42e6318/household-information[6]	9	6	6	9	2	2		0		1	1	1	2	1	1	2	0	6	3	0	0	6	3	0	1	3		3	2	2		2	2		2	2
May 17, 2021 4:04:54 PM	uuid:07dd38d0-484f-4e41-a6c4-0f7e1f4db409	11	14	2	Kibonkho	May 17, 2021	1242	1	50	1242	1	uuid:07dd38d0-484f-4e41-a6c4-0f7e1f4db409/household-information[2]	4	2	2	50	2	2		3		1	1	1	2	1	1	2	0	2	2	0	0	2	2	0	1	3		3	2	2		2	2		2	2
May 17, 2021 4:04:54 PM	uuid:07dd38d0-484f-4e41-a6c4-0f7e1f4db409	11	14	2	Kibonkho	May 17, 2021	1242	1	50	1242	1	uuid:07dd38d0-484f-4e41-a6c4-0f7e1f4db409/household-information[4]	4	4	3	13	1	2		0		1	1	1	2	1	1	2	0	2	2	0	0	2	2	0	1	3		3	2	2		2	2		2	2
May 17, 2021 4:04:54 PM	uuid:07dd38d0-484f-4e41-a6c4-0f7e1f4db409	11	14	2	Kibonkho	May 17, 2021	1242	1	50	1242	1	uuid:07dd38d0-484f-4e41-a6c4-0f7e1f4db409/household-information[1]	4	1	1	50	1	2		3		1	1	1	2	1	1	2	0	2	2	0	0	2	2	0	1	3		3	2	2		2	2		2	2
May 17, 2021 4:11:07 PM	uuid:fead5f47-a8dd-4b71-bd27-bc45678639e9	14	16	2	Kibonkho	May 17, 2021	1244	1	30	1244	1	uuid:fead5f47-a8dd-4b71-bd27-bc45678639e9/household-information[3]	3	3	3	3	2	0		0		1	1	1	2	1	1	2	1	0	2	0	1	0	2	0	1	3		4	4	5	Steel bar & net	2	2		2	2
May 17, 2021 4:11:07 PM	uuid:fead5f47-a8dd-4b71-bd27-bc45678639e9	14	16	2	Kibonkho	May 17, 2021	1244	1	30	1244	1	uuid:fead5f47-a8dd-4b71-bd27-bc45678639e9/household-information[1]	3	1	1	30	2	2		3		1	1	1	2	1	1	2	1	0	2	0	1	0	2	0	1	3		4	4	5	Steel bar & net	2	2		2	2
May 17, 2021 4:11:07 PM	uuid:fead5f47-a8dd-4b71-bd27-bc45678639e9	14	16	2	Kibonkho	May 17, 2021	1244	1	30	1244	1	uuid:fead5f47-a8dd-4b71-bd27-bc45678639e9/household-information[2]	3	2	2	30	1	2		3		1	1	1	2	1	1	2	1	0	2	0	1	0	2	0	1	3		4	4	5	Steel bar & net	2	2		2	2
May 17, 2021 3:59:20 PM	uuid:a68164a5-630c-4716-a178-1dd31026e4ee	5	11	2	Kibonkho	May 17, 2021	1245	1	38	1245	1	uuid:a68164a5-630c-4716-a178-1dd31026e4ee/household-information[1]	6	1	1	38	1	2		0		1	2	2	2	1	1	2	0	3	3	0	0	3	3	0	1	3		4	3	5	steel bar	2	2		2	2
May 17, 2021 3:59:20 PM	uuid:a68164a5-630c-4716-a178-1dd31026e4ee	5	11	2	Kibonkho	May 17, 2021	1245	1	38	1245	1	uuid:a68164a5-630c-4716-a178-1dd31026e4ee/household-information[3]	6	3	8	95	1	2		0		1	2	2	2	1	1	2	0	3	3	0	0	3	3	0	1	3		4	3	5	steel bar	2	2		2	2
May 17, 2021 3:59:20 PM	uuid:a68164a5-630c-4716-a178-1dd31026e4ee	5	11	2	Kibonkho	May 17, 2021	1245	1	38	1245	1	uuid:a68164a5-630c-4716-a178-1dd31026e4ee/household-information[2]	6	2	2	30	2	2		3		1	2	2	2	1	1	2	0	3	3	0	0	3	3	0	1	3		4	3	5	steel bar	2	2		2	2
May 17, 2021 3:59:20 PM	uuid:a68164a5-630c-4716-a178-1dd31026e4ee	5	11	2	Kibonkho	May 17, 2021	1245	1	38	1245	1	uuid:a68164a5-630c-4716-a178-1dd31026e4ee/household-information[4]	6	4	3	11	1	2		0		1	2	2	2	1	1	2	0	3	3	0	0	3	3	0	1	3		4	3	5	steel bar	2	2		2	2
May 17, 2021 3:59:20 PM	uuid:a68164a5-630c-4716-a178-1dd31026e4ee	5	11	2	Kibonkho	May 17, 2021	1245	1	38	1245	1	uuid:a68164a5-630c-4716-a178-1dd31026e4ee/household-information[5]	6	5	3	8	2	2		0		2		2	2	1	1	2	0	3	3	0	0	3	3	0	1	3		4	3	5	steel bar	2	2		2	2
May 17, 2021 3:59:20 PM	uuid:a68164a5-630c-4716-a178-1dd31026e4ee	5	11	2	Kibonkho	May 17, 2021	1245	1	38	1245	1	uuid:a68164a5-630c-4716-a178-1dd31026e4ee/household-information[6]	6	6	3	6	1	1		0		1	2	2	2	1	1	2	0	3	3	0	0	3	3	0	1	3		4	3	5	steel bar	2	2		2	2
May 17, 2021 4:01:32 PM	uuid:08045af0-cb3f-4184-bb02-4729672189e0	2	12	2	Kibonkho	May 17, 2021	1246	1	20	1246	3	uuid:08045af0-cb3f-4184-bb02-4729672189e0/household-information[2]	2	2	2	45	2	0		3		1	1	2	0	1	1	2	0	0	2	0	0	0	2	0	1	3		5	2	2		1	2		2	2
May 17, 2021 4:01:33 PM	uuid:a5408818-b693-484f-b60a-3e172674d82d	2	12	2	Kibonkho	May 17, 2021	1247	1	24	1247	1	uuid:a5408818-b693-484f-b60a-3e172674d82d/household-information[5]	5	5	3	3	1	0		0		1	2	1	2	1	1	2	1	2	2	0	0	0	2	0	1	3		1	2	2		2	2		2	5
May 17, 2021 4:01:33 PM	uuid:a5408818-b693-484f-b60a-3e172674d82d	2	12	2	Kibonkho	May 17, 2021	1247	1	24	1247	1	uuid:a5408818-b693-484f-b60a-3e172674d82d/household-information[1]	5	1	1	32	1	2		3		1	1	1	2	1	1	2	1	2	2	0	0	0	2	0	1	3		1	2	2		2	2		2	5
May 17, 2021 4:01:33 PM	uuid:a5408818-b693-484f-b60a-3e172674d82d	2	12	2	Kibonkho	May 17, 2021	1247	1	24	1247	1	uuid:a5408818-b693-484f-b60a-3e172674d82d/household-information[3]	5	3	3	12	2	2		0		1	1	1	2	1	1	2	1	2	2	0	0	0	2	0	1	3		1	2	2		2	2		2	5
May 17, 2021 4:01:33 PM	uuid:a5408818-b693-484f-b60a-3e172674d82d	2	12	2	Kibonkho	May 17, 2021	1247	1	24	1247	1	uuid:a5408818-b693-484f-b60a-3e172674d82d/household-information[4]	5	4	3	8	1	2		0		1	2	1	2	1	1	2	1	2	2	0	0	0	2	0	1	3		1	2	2		2	2		2	5
May 17, 2021 4:01:33 PM	uuid:a5408818-b693-484f-b60a-3e172674d82d	2	12	2	Kibonkho	May 17, 2021	1247	1	24	1247	1	uuid:a5408818-b693-484f-b60a-3e172674d82d/household-information[2]	5	2	2	24	2	2		3		1	1	1	2	1	1	2	1	2	2	0	0	0	2	0	1	3		1	2	2		2	2		2	5
May 17, 2021 4:03:57 PM	uuid:ca77e409-5a3b-4a15-bb80-46969eb04412	9	13	2	Kibonkho	May 17, 2021	1248	1	78	1248	1	uuid:ca77e409-5a3b-4a15-bb80-46969eb04412/household-information[4]	4	4	6	10	1	2		6	student	1	2	2	0	1	1	2	1	1	2	0	0	0	0	0	1	3		4	4	5	steel bar	2	5	Processed wood	2	5
May 17, 2021 4:03:57 PM	uuid:ca77e409-5a3b-4a15-bb80-46969eb04412	9	13	2	Kibonkho	May 17, 2021	1248	1	78	1248	1	uuid:ca77e409-5a3b-4a15-bb80-46969eb04412/household-information[3]	4	3	6	3	1	0		0		1	2	2	0	1	1	2	1	1	2	0	0	0	0	0	1	3		4	4	5	steel bar	2	5	Processed wood	2	5
May 17, 2021 4:03:57 PM	uuid:ca77e409-5a3b-4a15-bb80-46969eb04412	9	13	2	Kibonkho	May 17, 2021	1248	1	78	1248	1	uuid:ca77e409-5a3b-4a15-bb80-46969eb04412/household-information[1]	4	1	1	78	2	0		3		1	2	2	0	1	1	2	1	1	2	0	0	0	0	0	1	3		4	4	5	steel bar	2	5	Processed wood	2	5
May 17, 2021 4:04:55 PM	uuid:796d8479-9a4d-450c-86bb-1cd1a4f000be	11	14	2	Kibonkho	May 17, 2021	1249	1	70	1249	1	uuid:796d8479-9a4d-450c-86bb-1cd1a4f000be/household-information[2]	4	2	7	96	1	2		0		1	2	1	2	1	1	2	1	0	3	0	1	0	2	0	1	3		3	4	1		2	2		2	2
May 17, 2021 4:04:55 PM	uuid:796d8479-9a4d-450c-86bb-1cd1a4f000be	11	14	2	Kibonkho	May 17, 2021	1249	1	70	1249	1	uuid:796d8479-9a4d-450c-86bb-1cd1a4f000be/household-information[4]	4	4	6	2	1	0		0		1	1	1	2	1	1	2	1	0	3	0	1	0	2	0	1	3		3	4	1		2	2		2	2
May 17, 2021 4:04:55 PM	uuid:796d8479-9a4d-450c-86bb-1cd1a4f000be	11	14	2	Kibonkho	May 17, 2021	1249	1	70	1249	1	uuid:796d8479-9a4d-450c-86bb-1cd1a4f000be/household-information[3]	4	3	6	27	2	2		3		1	1	1	2	1	1	2	1	0	3	0	1	0	2	0	1	3		3	4	1		2	2		2	2
May 17, 2021 4:04:55 PM	uuid:796d8479-9a4d-450c-86bb-1cd1a4f000be	11	14	2	Kibonkho	May 17, 2021	1249	1	70	1249	1	uuid:796d8479-9a4d-450c-86bb-1cd1a4f000be/household-information[1]	4	1	1	70	2	2		3		1	1	1	2	1	1	2	1	0	3	0	1	0	2	0	1	3		3	4	1		2	2		2	2
May 17, 2021 4:06:49 PM	uuid:f8199353-e4bf-4031-a7bb-5844e46a9320	13	15	2	Kibonkho	May 17, 2021	1250	1	50	1250	1	uuid:f8199353-e4bf-4031-a7bb-5844e46a9320/household-information[7]	7	7	3	20	1	2		0		1	2	1	2	1	1	2	0	1	6	0	0	0	0	0	1	3		4	4	3		2	2		2	2
May 17, 2021 4:06:49 PM	uuid:f8199353-e4bf-4031-a7bb-5844e46a9320	13	15	2	Kibonkho	May 17, 2021	1250	1	50	1250	1	uuid:f8199353-e4bf-4031-a7bb-5844e46a9320/household-information[2]	7	2	4	28	1	2		3		1	2	1	2	1	1	2	0	1	6	0	0	0	0	0	1	3		4	4	3		2	2		2	2
May 17, 2021 4:06:49 PM	uuid:f8199353-e4bf-4031-a7bb-5844e46a9320	13	15	2	Kibonkho	May 17, 2021	1250	1	50	1250	1	uuid:f8199353-e4bf-4031-a7bb-5844e46a9320/household-information[1]	7	1	1	50	1	2		3		1	2	1	2	1	1	2	0	1	6	0	0	0	0	0	1	3		4	4	3		2	2		2	2
May 17, 2021 4:06:49 PM	uuid:f8199353-e4bf-4031-a7bb-5844e46a9320	13	15	2	Kibonkho	May 17, 2021	1250	1	50	1250	1	uuid:f8199353-e4bf-4031-a7bb-5844e46a9320/household-information[6]	7	6	4	45	1	2		3		1	2	1	2	1	1	2	0	1	6	0	0	0	0	0	1	3		4	4	3		2	2		2	2
May 17, 2021 4:06:49 PM	uuid:f8199353-e4bf-4031-a7bb-5844e46a9320	13	15	2	Kibonkho	May 17, 2021	1250	1	50	1250	1	uuid:f8199353-e4bf-4031-a7bb-5844e46a9320/household-information[5]	7	5	11	85	2	0		0		1	2	1	2	1	1	2	0	1	6	0	0	0	0	0	1	3		4	4	3		2	2		2	2
May 17, 2021 4:06:49 PM	uuid:f8199353-e4bf-4031-a7bb-5844e46a9320	13	15	2	Kibonkho	May 17, 2021	1250	1	50	1250	1	uuid:f8199353-e4bf-4031-a7bb-5844e46a9320/household-information[3]	7	3	3	20	2	2		0		1	2	1	2	1	1	2	0	1	6	0	0	0	0	0	1	3		4	4	3		2	2		2	2
May 17, 2021 4:06:49 PM	uuid:f8199353-e4bf-4031-a7bb-5844e46a9320	13	15	2	Kibonkho	May 17, 2021	1250	1	50	1250	1	uuid:f8199353-e4bf-4031-a7bb-5844e46a9320/household-information[4]	7	4	3	14	2	2		0		1	2	1	2	1	1	2	0	1	6	0	0	0	0	0	1	3		4	4	3		2	2		2	2
May 17, 2021 4:04:57 PM	uuid:2482887c-412d-40dd-a979-cf5489ca6077	4	14	2	Kibonkho	May 17, 2021	1252	1	65	1252	3	uuid:2482887c-412d-40dd-a979-cf5489ca6077/household-information[2]	7	2	1	70	1	2		3		1	1	1	2	1	1	2	1	4	2	0	1	4	2	0	1	3		4	4	1		2	3		2	2
May 17, 2021 4:04:57 PM	uuid:2482887c-412d-40dd-a979-cf5489ca6077	4	14	2	Kibonkho	May 17, 2021	1252	1	65	1252	3	uuid:2482887c-412d-40dd-a979-cf5489ca6077/household-information[3]	7	3	3	15	1	3		0		2		1	2	1	1	2	1	4	2	0	1	4	2	0	1	3		4	4	1		2	3		2	2
May 17, 2021 4:04:57 PM	uuid:2482887c-412d-40dd-a979-cf5489ca6077	4	14	2	Kibonkho	May 17, 2021	1252	1	65	1252	3	uuid:2482887c-412d-40dd-a979-cf5489ca6077/household-information[4]	7	4	3	13	2	2		0		1	1	1	2	1	1	2	1	4	2	0	1	4	2	0	1	3		4	4	1		2	3		2	2
May 17, 2021 4:04:57 PM	uuid:2482887c-412d-40dd-a979-cf5489ca6077	4	14	2	Kibonkho	May 17, 2021	1252	1	65	1252	3	uuid:2482887c-412d-40dd-a979-cf5489ca6077/household-information[1]	7	1	4	65	1	2		3		1	1	1	2	1	1	2	1	4	2	0	1	4	2	0	1	3		4	4	1		2	3		2	2
May 17, 2021 4:04:57 PM	uuid:2482887c-412d-40dd-a979-cf5489ca6077	4	14	2	Kibonkho	May 17, 2021	1252	1	65	1252	3	uuid:2482887c-412d-40dd-a979-cf5489ca6077/household-information[5]	7	5	3	11	1	2		0		1	1	1	2	1	1	2	1	4	2	0	1	4	2	0	1	3		4	4	1		2	3		2	2
May 17, 2021 4:04:57 PM	uuid:2482887c-412d-40dd-a979-cf5489ca6077	4	14	2	Kibonkho	May 17, 2021	1252	1	65	1252	3	uuid:2482887c-412d-40dd-a979-cf5489ca6077/household-information[7]	7	7	3	4	1	1		0		1	1	1	2	1	1	2	1	4	2	0	1	4	2	0	1	3		4	4	1		2	3		2	2
May 17, 2021 4:00:08 PM	uuid:258106b5-ce02-4771-bcac-08028dc616f2	5	11	2	Kibonkho	May 17, 2021	1254	1	69	1254	1	uuid:258106b5-ce02-4771-bcac-08028dc616f2/household-information[2]	2	2	4	50	2	0		3		1	1	2	0	1	1	2	0	0	2	0	0	0	2	0	1	3		4	2	3		1	2		2	2
May 17, 2021 4:06:51 PM	uuid:6b845e33-9240-4dc0-a37a-7e894d303664	13	15	2	Kibonkho	May 17, 2021	1257	1	40	1257	1	uuid:6b845e33-9240-4dc0-a37a-7e894d303664/household-information[3]	5	3	3	18	2	3		0		1	1	1	2	1	1	2	1	1	3	0	1	1	3	0	1	3		3	4	5	Net	2	2		2	5
May 17, 2021 4:06:51 PM	uuid:6b845e33-9240-4dc0-a37a-7e894d303664	13	15	2	Kibonkho	May 17, 2021	1257	1	40	1257	1	uuid:6b845e33-9240-4dc0-a37a-7e894d303664/household-information[5]	5	5	3	1	1	0		0		1	1	1	2	1	1	2	1	1	3	0	1	1	3	0	1	3		3	4	5	Net	2	2		2	5
May 17, 2021 4:06:51 PM	uuid:6b845e33-9240-4dc0-a37a-7e894d303664	13	15	2	Kibonkho	May 17, 2021	1257	1	40	1257	1	uuid:6b845e33-9240-4dc0-a37a-7e894d303664/household-information[1]	5	1	1	40	1	2		3		1	1	1	2	1	1	2	1	1	3	0	1	1	3	0	1	3		3	4	5	Net	2	2		2	5
May 17, 2021 4:06:51 PM	uuid:6b845e33-9240-4dc0-a37a-7e894d303664	13	15	2	Kibonkho	May 17, 2021	1257	1	40	1257	1	uuid:6b845e33-9240-4dc0-a37a-7e894d303664/household-information[4]	5	4	3	11	2	0		0		1	1	1	2	1	1	2	1	1	3	0	1	1	3	0	1	3		3	4	5	Net	2	2		2	5
May 17, 2021 4:11:09 PM	uuid:9a52b341-695b-428b-af73-42737749b1ec	3	16	2	Kibonkho	May 17, 2021	1258	1	54	1258	2	uuid:9a52b341-695b-428b-af73-42737749b1ec/household-information[1]	2	1	1	67	1	2		3		1	2	1	2	1	1	2	0	0	2	0	0	0	2	0	1	3		4	8	2		2	2		2	2
May 17, 2021 4:11:10 PM	uuid:293e4df6-6876-4ba1-ac8d-244a95d4db1b	14	16	2	Kibonkho	May 17, 2021	1259	1	52	1259	1	uuid:293e4df6-6876-4ba1-ac8d-244a95d4db1b/household-information[5]	10	5	3	17	2	3		0		1	2	1	2	1	1	1	1	5	4	0	0	0	0	0	1	3		4	1	0		1	2		2	2
May 17, 2021 4:11:10 PM	uuid:293e4df6-6876-4ba1-ac8d-244a95d4db1b	14	16	2	Kibonkho	May 17, 2021	1259	1	52	1259	1	uuid:293e4df6-6876-4ba1-ac8d-244a95d4db1b/household-information[3]	10	3	3	28	2	2		2		1	2	1	2	1	1	1	1	5	4	0	0	0	0	0	1	3		4	1	0		1	2		2	2
May 17, 2021 4:11:10 PM	uuid:293e4df6-6876-4ba1-ac8d-244a95d4db1b	14	16	2	Kibonkho	May 17, 2021	1259	1	52	1259	1	uuid:293e4df6-6876-4ba1-ac8d-244a95d4db1b/household-information[6]	10	6	3	10	2	2		0		1	2	1	2	1	1	1	1	5	4	0	0	0	0	0	1	3		4	1	0		1	2		2	2
May 17, 2021 4:11:10 PM	uuid:293e4df6-6876-4ba1-ac8d-244a95d4db1b	14	16	2	Kibonkho	May 17, 2021	1259	1	52	1259	1	uuid:293e4df6-6876-4ba1-ac8d-244a95d4db1b/household-information[2]	10	2	11	90	2	0		0		1	2	1	2	1	1	1	1	5	4	0	0	0	0	0	1	3		4	1	0		1	2		2	2
May 17, 2021 4:11:10 PM	uuid:293e4df6-6876-4ba1-ac8d-244a95d4db1b	14	16	2	Kibonkho	May 17, 2021	1259	1	52	1259	1	uuid:293e4df6-6876-4ba1-ac8d-244a95d4db1b/household-information[9]	10	9	6	8	1	2		0		1	2	1	2	1	1	1	1	5	4	0	0	0	0	0	1	3		4	1	0		1	2		2	2
May 17, 2021 4:11:10 PM	uuid:293e4df6-6876-4ba1-ac8d-244a95d4db1b	14	16	2	Kibonkho	May 17, 2021	1259	1	52	1259	1	uuid:293e4df6-6876-4ba1-ac8d-244a95d4db1b/household-information[8]	10	8	6	6	1	0		0		1	2	1	2	1	1	1	1	5	4	0	0	0	0	0	1	3		4	1	0		1	2		2	2
May 17, 2021 4:11:10 PM	uuid:293e4df6-6876-4ba1-ac8d-244a95d4db1b	14	16	2	Kibonkho	May 17, 2021	1259	1	52	1259	1	uuid:293e4df6-6876-4ba1-ac8d-244a95d4db1b/household-information[7]	10	7	6	6	2	0		0		1	2	1	2	1	1	1	1	5	4	0	0	0	0	0	1	3		4	1	0		1	2		2	2
May 17, 2021 4:11:10 PM	uuid:293e4df6-6876-4ba1-ac8d-244a95d4db1b	14	16	2	Kibonkho	May 17, 2021	1259	1	52	1259	1	uuid:293e4df6-6876-4ba1-ac8d-244a95d4db1b/household-information[10]	10	10	6	1	1	0		0		1	2	1	2	1	1	1	1	5	4	0	0	0	0	0	1	3		4	1	0		1	2		2	2
May 17, 2021 4:11:10 PM	uuid:293e4df6-6876-4ba1-ac8d-244a95d4db1b	14	16	2	Kibonkho	May 17, 2021	1259	1	52	1259	1	uuid:293e4df6-6876-4ba1-ac8d-244a95d4db1b/household-information[1]	10	1	1	52	2	2		3		1	2	1	2	1	1	1	1	5	4	0	0	0	0	0	1	3		4	1	0		1	2		2	2
May 17, 2021 4:11:10 PM	uuid:293e4df6-6876-4ba1-ac8d-244a95d4db1b	14	16	2	Kibonkho	May 17, 2021	1259	1	52	1259	1	uuid:293e4df6-6876-4ba1-ac8d-244a95d4db1b/household-information[4]	10	4	3	19	1	3		0		1	2	1	2	1	1	1	1	5	4	0	0	0	0	0	1	3		4	1	0		1	2		2	2
May 17, 2021 4:03:58 PM	uuid:6d645e8c-d02b-44e5-9c85-e8db0e1960ed	10	13	2	Kibonkho	May 17, 2021	1261	1	25	1261	1	uuid:6d645e8c-d02b-44e5-9c85-e8db0e1960ed/household-information[2]	5	2	2	23	2	2		3		1	2	2	2	1	1	2	2	1	2	0	0	0	0	0	1	3		4	1	1		1	5	Processed wood	2	2
May 17, 2021 4:03:58 PM	uuid:6d645e8c-d02b-44e5-9c85-e8db0e1960ed	10	13	2	Kibonkho	May 17, 2021	1261	1	25	1261	1	uuid:6d645e8c-d02b-44e5-9c85-e8db0e1960ed/household-information[3]	5	3	3	10	1	0		0		1	2	2	2	1	1	2	2	1	2	0	0	0	0	0	1	3		4	1	1		1	5	Processed wood	2	2
May 17, 2021 4:03:58 PM	uuid:6d645e8c-d02b-44e5-9c85-e8db0e1960ed	10	13	2	Kibonkho	May 17, 2021	1261	1	25	1261	1	uuid:6d645e8c-d02b-44e5-9c85-e8db0e1960ed/household-information[1]	5	1	1	25	1	2		3		1	2	2	2	1	1	2	2	1	2	0	0	0	0	0	1	3		4	1	1		1	5	Processed wood	2	2
May 17, 2021 4:03:58 PM	uuid:6d645e8c-d02b-44e5-9c85-e8db0e1960ed	10	13	2	Kibonkho	May 17, 2021	1261	1	25	1261	1	uuid:6d645e8c-d02b-44e5-9c85-e8db0e1960ed/household-information[4]	5	4	3	5	1	0		0		1	2	2	2	1	1	2	2	1	2	0	0	0	0	0	1	3		4	1	1		1	5	Processed wood	2	2
May 17, 2021 4:03:58 PM	uuid:6d645e8c-d02b-44e5-9c85-e8db0e1960ed	10	13	2	Kibonkho	May 17, 2021	1261	1	25	1261	1	uuid:6d645e8c-d02b-44e5-9c85-e8db0e1960ed/household-information[5]	5	5	3	1	2	0		0		1	2	2	2	1	1	2	2	1	2	0	0	0	0	0	1	3		4	1	1		1	5	Processed wood	2	2
May 17, 2021 4:12:58 PM	uuid:4b6b26a8-6b56-47fc-96e1-690b64e16a26	6	17	2	Kibonkho	May 17, 2021	1262	1	48	1262	1	uuid:4b6b26a8-6b56-47fc-96e1-690b64e16a26/household-information[1]	3	1	1	48	1	2		3		1	1	1	2	1	1	2	0	0	3	0	0	0	3	0	1	3		4	3	1		2	2		2	2
May 17, 2021 4:12:58 PM	uuid:4b6b26a8-6b56-47fc-96e1-690b64e16a26	6	17	2	Kibonkho	May 17, 2021	1262	1	48	1262	1	uuid:4b6b26a8-6b56-47fc-96e1-690b64e16a26/household-information[3]	3	3	11	75	1	0		3		1	1	1	2	1	1	2	0	0	3	0	0	0	3	0	1	3		4	3	1		2	2		2	2
May 17, 2021 4:01:35 PM	uuid:df732f64-3f2e-492b-9904-cdbc7d18cb6a	2	12	2	Kibonkho	May 17, 2021	1263	1	35	1263	1	uuid:df732f64-3f2e-492b-9904-cdbc7d18cb6a/household-information[2]	5	2	3	16	1	2		0		1	1	1	2	1	1	2	1	3	1	0	1	3	1	0	1	3		3	2	2		1	2		2	2
May 17, 2021 4:01:35 PM	uuid:df732f64-3f2e-492b-9904-cdbc7d18cb6a	2	12	2	Kibonkho	May 17, 2021	1263	1	35	1263	1	uuid:df732f64-3f2e-492b-9904-cdbc7d18cb6a/household-information[3]	5	3	3	9	1	2		0		1	1	1	2	1	1	2	1	3	1	0	1	3	1	0	1	3		3	2	2		1	2		2	2
May 17, 2021 4:01:35 PM	uuid:df732f64-3f2e-492b-9904-cdbc7d18cb6a	2	12	2	Kibonkho	May 17, 2021	1263	1	35	1263	1	uuid:df732f64-3f2e-492b-9904-cdbc7d18cb6a/household-information[4]	5	4	3	5	2	0		0		1	1	1	2	1	1	2	1	3	1	0	1	3	1	0	1	3		3	2	2		1	2		2	2
May 17, 2021 4:01:35 PM	uuid:df732f64-3f2e-492b-9904-cdbc7d18cb6a	2	12	2	Kibonkho	May 17, 2021	1263	1	35	1263	1	uuid:df732f64-3f2e-492b-9904-cdbc7d18cb6a/household-information[5]	5	5	3	1	1	0		0		1	1	1	2	1	1	2	1	3	1	0	1	3	1	0	1	3		3	2	2		1	2		2	2
May 17, 2021 4:01:35 PM	uuid:df732f64-3f2e-492b-9904-cdbc7d18cb6a	2	12	2	Kibonkho	May 17, 2021	1263	1	35	1263	1	uuid:df732f64-3f2e-492b-9904-cdbc7d18cb6a/household-information[1]	5	1	1	35	2	2		3		1	1	1	2	1	1	2	1	3	1	0	1	3	1	0	1	3		3	2	2		1	2		2	2
May 17, 2021 4:06:53 PM	uuid:bbf0facb-e293-4f83-85cf-9b8c623045b9	13	15	2	Kibonkho	May 17, 2021	1264	1	54	1264	1	uuid:bbf0facb-e293-4f83-85cf-9b8c623045b9/household-information[2]	2	2	2	48	2	2		3		1	1	1	2	1	1	2	0	0	2	0	0	0	2	0	1	1		4	1	3		2	2		2	2
May 17, 2021 4:04:58 PM	uuid:76b9fc5f-16a6-403e-9ffc-e04ec40ed69d	11	14	2	Kibonkho	May 17, 2021	1265	1	28	1265	1	uuid:76b9fc5f-16a6-403e-9ffc-e04ec40ed69d/household-information[1]	1	1	1	28	1	2		3		1	1	2	2	1	1	2	0	0	1	0	0	0	1	0	1	3		4	2	2		1	2		2	5
May 17, 2021 4:03:59 PM	uuid:a5aa6782-738c-445c-a107-419ebf1c80a2	9	13	2	Kibonkho	May 17, 2021	1266	1	41	1266	1	uuid:a5aa6782-738c-445c-a107-419ebf1c80a2/household-information[3]	7	3	3	16	1	3		6	student	1	1	1	2	2	2	2	1	3	3	0	1	3	3	0	2	3		0	4	5	steel bar	2	5	Processed wood	2	2
May 17, 2021 4:03:59 PM	uuid:a5aa6782-738c-445c-a107-419ebf1c80a2	9	13	2	Kibonkho	May 17, 2021	1266	1	41	1266	1	uuid:a5aa6782-738c-445c-a107-419ebf1c80a2/household-information[7]	7	7	3	25	1	2		1		1	1	1	2	2	1	2	1	3	3	0	1	3	3	0	1	3		4	4	5	steel bar	1	5	Processed wood	2	5
May 17, 2021 4:03:59 PM	uuid:a5aa6782-738c-445c-a107-419ebf1c80a2	9	13	2	Kibonkho	May 17, 2021	1266	1	41	1266	1	uuid:a5aa6782-738c-445c-a107-419ebf1c80a2/household-information[5]	7	5	3	11	2	2		6	student	1	1	1	2	2	2	2	1	3	3	0	1	3	3	0	1	3		4	4	5	steel bar	1	5	Processed wood	2	5
May 17, 2021 4:03:59 PM	uuid:a5aa6782-738c-445c-a107-419ebf1c80a2	9	13	2	Kibonkho	May 17, 2021	1266	1	41	1266	1	uuid:a5aa6782-738c-445c-a107-419ebf1c80a2/household-information[1]	7	1	1	41	1	2		1		1	1	1	2	2	2	2	1	3	3	0	1	3	3	0	1	3		4	4	5	steel bar	1	5	Processed wood	2	5
May 17, 2021 4:03:59 PM	uuid:a5aa6782-738c-445c-a107-419ebf1c80a2	9	13	2	Kibonkho	May 17, 2021	1266	1	41	1266	1	uuid:a5aa6782-738c-445c-a107-419ebf1c80a2/household-information[2]	7	2	2	32	2	2		2		1	1	1	2	2	2	2	1	3	3	0	1	3	3	0	1	3		4	4	5	steel bar	1	5	Processed wood	2	5
May 17, 2021 4:03:59 PM	uuid:a5aa6782-738c-445c-a107-419ebf1c80a2	9	13	2	Kibonkho	May 17, 2021	1266	1	41	1266	1	uuid:a5aa6782-738c-445c-a107-419ebf1c80a2/household-information[6]	7	6	3	1	2	0		0		1	1	1	2	2	2	2	1	3	3	0	1	3	3	0	1	3		4	4	5	steel bar	1	5	Processed wood	2	5
May 17, 2021 4:06:57 PM	uuid:020b9a0a-80b7-4709-8f41-6b4d60706b16	13	15	2	Kibonkho	May 17, 2021	1267	1	82	1267	1	uuid:020b9a0a-80b7-4709-8f41-6b4d60706b16/household-information[5]	6	5	6	4	2	0		0		1	2	1	0	1	1	2	1	2	3	0	0	0	0	0	1	3		4	2	5	Net	3	2		2	2
May 17, 2021 4:06:57 PM	uuid:020b9a0a-80b7-4709-8f41-6b4d60706b16	13	15	2	Kibonkho	May 17, 2021	1267	1	82	1267	1	uuid:020b9a0a-80b7-4709-8f41-6b4d60706b16/household-information[1]	6	1	1	82	1	0		3		1	2	1	0	1	1	2	1	2	3	0	0	0	0	0	1	3		4	2	5	Net	3	2		2	2
May 17, 2021 4:06:57 PM	uuid:020b9a0a-80b7-4709-8f41-6b4d60706b16	13	15	2	Kibonkho	May 17, 2021	1267	1	82	1267	1	uuid:020b9a0a-80b7-4709-8f41-6b4d60706b16/household-information[2]	6	2	2	40	2	0		3		1	2	1	0	1	1	2	1	2	3	0	0	0	0	0	1	3		4	2	5	Net	3	2		2	2
May 17, 2021 4:06:57 PM	uuid:020b9a0a-80b7-4709-8f41-6b4d60706b16	13	15	2	Kibonkho	May 17, 2021	1267	1	82	1267	1	uuid:020b9a0a-80b7-4709-8f41-6b4d60706b16/household-information[6]	6	6	6	1	1	0		0		1	2	1	0	1	1	2	1	2	3	0	0	0	0	0	1	3		4	2	5	Net	3	2		2	2
May 17, 2021 4:06:57 PM	uuid:020b9a0a-80b7-4709-8f41-6b4d60706b16	13	15	2	Kibonkho	May 17, 2021	1267	1	82	1267	1	uuid:020b9a0a-80b7-4709-8f41-6b4d60706b16/household-information[3]	6	3	3	18	1	3		0		1	2	1	0	1	1	2	1	2	3	0	0	0	0	0	1	3		4	2	5	Net	3	2		2	2
May 17, 2021 4:12:59 PM	uuid:86dcc6a5-ee75-4bd1-8f38-70e0d6b82c6c	16	17	2	Kibonkho	May 17, 2021	1270	1	76	1270	1	uuid:86dcc6a5-ee75-4bd1-8f38-70e0d6b82c6c/household-information[6]	11	6	3	44	2	3		2		1	1	1	3	2	1	2	1	2	8	0	1	2	8	0	1	3		1	2	2		2	2		2	2
May 17, 2021 4:12:59 PM	uuid:86dcc6a5-ee75-4bd1-8f38-70e0d6b82c6c	16	17	2	Kibonkho	May 17, 2021	1270	1	76	1270	1	uuid:86dcc6a5-ee75-4bd1-8f38-70e0d6b82c6c/household-information[1]	11	1	1	76	1	3		3		1	1	1	3	2	1	2	1	2	8	0	1	2	8	0	2	3		4	2	2		1	2		2	2
May 17, 2021 4:12:59 PM	uuid:86dcc6a5-ee75-4bd1-8f38-70e0d6b82c6c	16	17	2	Kibonkho	May 17, 2021	1270	1	76	1270	1	uuid:86dcc6a5-ee75-4bd1-8f38-70e0d6b82c6c/household-information[9]	11	9	3	37	1	3		5		1	1	1	3	2	1	2	1	2	8	0	1	2	8	0	2	3		4	2	2		1	2		2	2
May 17, 2021 4:12:59 PM	uuid:86dcc6a5-ee75-4bd1-8f38-70e0d6b82c6c	16	17	2	Kibonkho	May 17, 2021	1270	1	76	1270	1	uuid:86dcc6a5-ee75-4bd1-8f38-70e0d6b82c6c/household-information[5]	11	5	3	52	2	3		2		1	1	1	3	2	1	2	1	2	8	0	1	2	8	0	2	3		4	2	2		1	2		2	2
May 17, 2021 4:12:59 PM	uuid:86dcc6a5-ee75-4bd1-8f38-70e0d6b82c6c	16	17	2	Kibonkho	May 17, 2021	1270	1	76	1270	1	uuid:86dcc6a5-ee75-4bd1-8f38-70e0d6b82c6c/household-information[4]	11	4	6	3	1	1		0		1	1	1	3	2	1	2	1	2	8	0	1	2	8	0	2	3		4	2	2		1	2		2	2
May 17, 2021 4:12:59 PM	uuid:86dcc6a5-ee75-4bd1-8f38-70e0d6b82c6c	16	17	2	Kibonkho	May 17, 2021	1270	1	76	1270	1	uuid:86dcc6a5-ee75-4bd1-8f38-70e0d6b82c6c/household-information[11]	11	11	6	8	1	2		6	student	1	1	1	3	2	2	2	1	2	8	0	1	2	8	0	2	3		4	2	2		1	2		2	2
May 17, 2021 4:12:59 PM	uuid:86dcc6a5-ee75-4bd1-8f38-70e0d6b82c6c	16	17	2	Kibonkho	May 17, 2021	1270	1	76	1270	1	uuid:86dcc6a5-ee75-4bd1-8f38-70e0d6b82c6c/household-information[8]	11	8	6	12	2	2		6	student	1	1	1	3	2	1	2	1	2	8	0	1	2	8	0	2	3		4	2	2		1	2		2	2
May 17, 2021 4:12:59 PM	uuid:86dcc6a5-ee75-4bd1-8f38-70e0d6b82c6c	16	17	2	Kibonkho	May 17, 2021	1270	1	76	1270	1	uuid:86dcc6a5-ee75-4bd1-8f38-70e0d6b82c6c/household-information[2]	11	2	2	73	2	2		3		1	1	1	3	2	1	2	1	2	8	0	1	2	8	0	2	3		4	2	2		1	2		2	2
May 17, 2021 4:12:59 PM	uuid:86dcc6a5-ee75-4bd1-8f38-70e0d6b82c6c	16	17	2	Kibonkho	May 17, 2021	1270	1	76	1270	1	uuid:86dcc6a5-ee75-4bd1-8f38-70e0d6b82c6c/household-information[7]	11	7	6	29	2	3		2		1	1	1	3	2	1	2	1	2	8	0	1	2	8	0	2	3		4	2	2		1	2		2	2
May 17, 2021 4:12:59 PM	uuid:86dcc6a5-ee75-4bd1-8f38-70e0d6b82c6c	16	17	2	Kibonkho	May 17, 2021	1270	1	76	1270	1	uuid:86dcc6a5-ee75-4bd1-8f38-70e0d6b82c6c/household-information[3]	11	3	3	38	1	2		3		1	1	1	3	2	1	2	1	2	8	0	1	2	8	0	2	3		4	2	2		1	2		2	2
May 17, 2021 4:01:36 PM	uuid:f3e45f3d-3610-4b8e-b245-31a92abc56d0	7	12	2	Kibonkho	May 17, 2021	1272	1	18	1272	2	uuid:f3e45f3d-3610-4b8e-b245-31a92abc56d0/household-information[2]	3	2	2	18	2	2		3		1	1	1	2	1	1	2	0	1	2	0	0	1	2	0	1	3		4	3	2		1	2		2	5
May 17, 2021 4:01:36 PM	uuid:f3e45f3d-3610-4b8e-b245-31a92abc56d0	7	12	2	Kibonkho	May 17, 2021	1272	1	18	1272	2	uuid:f3e45f3d-3610-4b8e-b245-31a92abc56d0/household-information[1]	3	1	1	34	1	2		3		1	1	1	2	1	1	2	0	1	2	0	0	1	2	0	1	3		4	3	2		1	2		2	5
May 17, 2021 4:01:36 PM	uuid:f3e45f3d-3610-4b8e-b245-31a92abc56d0	7	12	2	Kibonkho	May 17, 2021	1272	1	18	1272	2	uuid:f3e45f3d-3610-4b8e-b245-31a92abc56d0/household-information[3]	3	3	3	8	1	2		0		1	1	1	2	1	1	2	0	1	2	0	0	1	2	0	1	3		4	3	2		1	2		2	5
May 17, 2021 4:04:01 PM	uuid:dc329145-8bbe-4502-8841-712d4151dffb	10	13	2	Kibonkho	May 17, 2021	1274	1	81	1274	1	uuid:dc329145-8bbe-4502-8841-712d4151dffb/household-information[1]	2	1	1	81	2	0		3		1	1	2	0	1	1	2	0	1	1	0	0	1	1	0	1	3		4	3	5	steel bar	1	5	Processed wood	2	5
May 17, 2021 4:11:12 PM	uuid:f589fa4f-2c2b-42d2-9743-9093819fa555	3	16	2	Kibonkho	May 17, 2021	1278	1	25	1278	2	uuid:f589fa4f-2c2b-42d2-9743-9093819fa555/household-information[1]	5	1	1	36	1	2		3		1	2	1	2	1	1	2	1	2	2	0	0	0	0	0	1	3		1	2	4		1	2		2	2
May 17, 2021 4:11:12 PM	uuid:f589fa4f-2c2b-42d2-9743-9093819fa555	3	16	2	Kibonkho	May 17, 2021	1278	1	25	1278	2	uuid:f589fa4f-2c2b-42d2-9743-9093819fa555/household-information[5]	5	5	3	1	2	0		0		1	2	1	2	1	1	2	1	2	2	0	0	0	0	0	1	3		1	2	4		1	2		2	2
May 17, 2021 4:11:12 PM	uuid:f589fa4f-2c2b-42d2-9743-9093819fa555	3	16	2	Kibonkho	May 17, 2021	1278	1	25	1278	2	uuid:f589fa4f-2c2b-42d2-9743-9093819fa555/household-information[3]	5	3	3	9	2	2		0		1	2	1	2	1	1	2	1	2	2	0	0	0	0	0	1	3		1	2	4		1	2		2	2
May 17, 2021 4:11:12 PM	uuid:f589fa4f-2c2b-42d2-9743-9093819fa555	3	16	2	Kibonkho	May 17, 2021	1278	1	25	1278	2	uuid:f589fa4f-2c2b-42d2-9743-9093819fa555/household-information[4]	5	4	3	6	2	0		0		1	2	1	2	1	1	2	1	2	2	0	0	0	0	0	1	3		1	2	4		1	2		2	2
May 17, 2021 4:13:01 PM	uuid:0e7b8dc5-e053-4868-80da-3df5d61e7abf	6	17	2	Kibonkho	May 17, 2021	1279	1	52	1279	1	uuid:0e7b8dc5-e053-4868-80da-3df5d61e7abf/household-information[5]	8	5	3	5	2	1		0		1	1	1	3	1	1	2	2	0	6	0	2	0	6	0	1	3		3	9	4		2	2		2	6
May 17, 2021 4:13:01 PM	uuid:0e7b8dc5-e053-4868-80da-3df5d61e7abf	6	17	2	Kibonkho	May 17, 2021	1279	1	52	1279	1	uuid:0e7b8dc5-e053-4868-80da-3df5d61e7abf/household-information[8]	8	8	3	1	1	0		0		1	1	1	3	1	1	2	2	0	6	0	2	0	6	0	1	3		3	9	4		2	2		2	6
May 17, 2021 4:13:01 PM	uuid:0e7b8dc5-e053-4868-80da-3df5d61e7abf	6	17	2	Kibonkho	May 17, 2021	1279	1	52	1279	1	uuid:0e7b8dc5-e053-4868-80da-3df5d61e7abf/household-information[1]	8	1	1	52	2	3		2		1	1	1	3	1	1	2	2	0	6	0	2	0	6	0	1	3		3	9	4		2	2		2	6
May 17, 2021 4:13:01 PM	uuid:0e7b8dc5-e053-4868-80da-3df5d61e7abf	6	17	2	Kibonkho	May 17, 2021	1279	1	52	1279	1	uuid:0e7b8dc5-e053-4868-80da-3df5d61e7abf/household-information[4]	8	4	4	38	2	2		3		1	1	1	3	1	1	2	2	0	6	0	2	0	6	0	1	3		3	9	4		2	2		2	6
May 17, 2021 4:13:01 PM	uuid:0e7b8dc5-e053-4868-80da-3df5d61e7abf	6	17	2	Kibonkho	May 17, 2021	1279	1	52	1279	1	uuid:0e7b8dc5-e053-4868-80da-3df5d61e7abf/household-information[7]	8	7	3	21	2	3		3		1	1	1	3	1	1	2	2	0	6	0	2	0	6	0	1	3		3	9	4		2	2		2	6
May 17, 2021 4:13:01 PM	uuid:0e7b8dc5-e053-4868-80da-3df5d61e7abf	6	17	2	Kibonkho	May 17, 2021	1279	1	52	1279	1	uuid:0e7b8dc5-e053-4868-80da-3df5d61e7abf/household-information[6]	8	6	3	26	2	3		3		1	1	1	3	1	1	2	2	0	6	0	2	0	6	0	1	3		3	9	4		2	2		2	6
May 17, 2021 4:13:01 PM	uuid:0e7b8dc5-e053-4868-80da-3df5d61e7abf	6	17	2	Kibonkho	May 17, 2021	1279	1	52	1279	1	uuid:0e7b8dc5-e053-4868-80da-3df5d61e7abf/household-information[3]	8	3	4	49	1	2		6	Driver	1	1	1	3	1	1	2	2	0	6	0	2	0	6	0	1	3		3	9	4		2	2		2	6
May 17, 2021 4:13:01 PM	uuid:0e7b8dc5-e053-4868-80da-3df5d61e7abf	6	17	2	Kibonkho	May 17, 2021	1279	1	52	1279	1	uuid:0e7b8dc5-e053-4868-80da-3df5d61e7abf/household-information[2]	8	2	4	47	1	2		1		1	1	1	3	1	1	2	2	0	6	0	2	0	6	0	1	3		3	9	4		2	2		2	6
May 17, 2021 4:13:02 PM	uuid:9d0cc0e0-fb77-4785-a4aa-7053aacb585e	16	17	2	Kibonkho	May 17, 2021	1281	1	25	1281	2	uuid:9d0cc0e0-fb77-4785-a4aa-7053aacb585e/household-information[3]	5	3	3	4	1	1		0		1	1	1	3	1	1	2	1	2	2	0	1	0	2	0	1	3		1	4	2		2	2		2	5
May 17, 2021 4:13:02 PM	uuid:9d0cc0e0-fb77-4785-a4aa-7053aacb585e	16	17	2	Kibonkho	May 17, 2021	1281	1	25	1281	2	uuid:9d0cc0e0-fb77-4785-a4aa-7053aacb585e/household-information[1]	5	1	1	30	1	3		2		1	1	1	3	1	1	2	1	2	2	0	1	0	2	0	1	3		1	4	2		2	2		2	5
May 17, 2021 4:13:02 PM	uuid:9d0cc0e0-fb77-4785-a4aa-7053aacb585e	16	17	2	Kibonkho	May 17, 2021	1281	1	25	1281	2	uuid:9d0cc0e0-fb77-4785-a4aa-7053aacb585e/household-information[2]	5	2	2	25	2	3		2		1	1	1	3	1	1	2	1	2	2	0	1	0	2	0	1	3		1	4	2		2	2		2	5
May 17, 2021 4:13:02 PM	uuid:9d0cc0e0-fb77-4785-a4aa-7053aacb585e	16	17	2	Kibonkho	May 17, 2021	1281	1	25	1281	2	uuid:9d0cc0e0-fb77-4785-a4aa-7053aacb585e/household-information[5]	5	5	5	12	2	1		0		1	2	1	3	1	1	2	1	2	2	0	1	0	2	0	1	3		1	4	2		2	2		2	5
May 18, 2021 4:09:06 PM	uuid:6a60087a-7c29-4204-adac-9ed358b262ff	10	13	2	Mbuyu	May 18, 2021	1284	1	87	1284	1	uuid:6a60087a-7c29-4204-adac-9ed358b262ff/household-information[1]	3	1	1	84	1	0		3		1	1	2	0	1	1	2	0	1	1	0	0	1	1	0	1	3		4	6	1		2	3		2	2
May 18, 2021 4:09:06 PM	uuid:6a60087a-7c29-4204-adac-9ed358b262ff	10	13	2	Mbuyu	May 18, 2021	1284	1	87	1284	1	uuid:6a60087a-7c29-4204-adac-9ed358b262ff/household-information[2]	3	2	2	55	2	0		3		2		2	0	1	1	2	0	1	1	0	0	1	1	0	1	3		4	6	1		2	3		2	2
May 18, 2021 4:09:06 PM	uuid:6a60087a-7c29-4204-adac-9ed358b262ff	10	13	2	Mbuyu	May 18, 2021	1284	1	87	1284	1	uuid:6a60087a-7c29-4204-adac-9ed358b262ff/household-information[3]	3	3	6	6	1	2		6	student	1	1	2	0	1	1	2	0	1	1	0	0	1	1	0	1	3		4	6	1		2	3		2	2
May 18, 2021 4:04:14 PM	uuid:e04ecb09-606c-4ea4-afd6-bb0f7dc55686	14	16	2	Mbuyu	May 18, 2021	1285	1	25	1285	1	uuid:e04ecb09-606c-4ea4-afd6-bb0f7dc55686/household-information[1]	3	1	1	25	1	2		3		1	1	1	2	1	1	2	1	0	2	0	1	0	2	0	1	3		2	1	5	Net	1	2		2	2
May 18, 2021 4:04:14 PM	uuid:e04ecb09-606c-4ea4-afd6-bb0f7dc55686	14	16	2	Mbuyu	May 18, 2021	1285	1	25	1285	1	uuid:e04ecb09-606c-4ea4-afd6-bb0f7dc55686/household-information[2]	3	2	2	22	2	2		3		1	1	1	2	1	1	2	1	0	2	0	1	0	2	0	1	3		2	1	5	Net	1	2		2	2
May 18, 2021 4:04:14 PM	uuid:e04ecb09-606c-4ea4-afd6-bb0f7dc55686	14	16	2	Mbuyu	May 18, 2021	1285	1	25	1285	1	uuid:e04ecb09-606c-4ea4-afd6-bb0f7dc55686/household-information[3]	3	3	3	1	2	2		0		1	1	1	2	1	1	2	1	0	2	0	1	0	2	0	1	3		2	1	5	Net	1	2		2	2
May 18, 2021 4:10:50 PM	uuid:b7d660b2-db6d-4a64-ae14-5aefdd5fb3c7	11	14	2	Mbuyu	May 18, 2021	1286	1	42	1286	3	uuid:b7d660b2-db6d-4a64-ae14-5aefdd5fb3c7/household-information[6]	10	6	6	13	2	2		0		1	2	2	0	1	1	2	1	6	3	0	0	0	0	0	1	3		4	2	1		2	3		2	2
May 18, 2021 4:10:50 PM	uuid:b7d660b2-db6d-4a64-ae14-5aefdd5fb3c7	11	14	2	Mbuyu	May 18, 2021	1286	1	42	1286	3	uuid:b7d660b2-db6d-4a64-ae14-5aefdd5fb3c7/household-information[1]	10	1	1	81	1	0		0		2		2	0	1	1	2	1	6	3	0	0	0	0	0	1	3		4	2	1		2	3		2	2
May 18, 2021 4:10:50 PM	uuid:b7d660b2-db6d-4a64-ae14-5aefdd5fb3c7	11	14	2	Mbuyu	May 18, 2021	1286	1	42	1286	3	uuid:b7d660b2-db6d-4a64-ae14-5aefdd5fb3c7/household-information[4]	10	4	6	16	2	2		3		1	2	2	0	1	1	2	1	6	3	0	0	0	0	0	1	3		4	2	1		2	3		2	2
May 18, 2021 4:10:50 PM	uuid:b7d660b2-db6d-4a64-ae14-5aefdd5fb3c7	11	14	2	Mbuyu	May 18, 2021	1286	1	42	1286	3	uuid:b7d660b2-db6d-4a64-ae14-5aefdd5fb3c7/household-information[3]	10	3	6	20	2	2		3		1	2	2	0	1	1	2	1	6	3	0	0	0	0	0	1	3		4	2	1		2	3		2	2
May 18, 2021 4:10:50 PM	uuid:b7d660b2-db6d-4a64-ae14-5aefdd5fb3c7	11	14	2	Mbuyu	May 18, 2021	1286	1	42	1286	3	uuid:b7d660b2-db6d-4a64-ae14-5aefdd5fb3c7/household-information[2]	10	2	2	60	2	0		3		1	2	2	0	1	1	2	1	6	3	0	0	0	0	0	1	3		4	2	1		2	3		2	2
May 18, 2021 4:10:50 PM	uuid:b7d660b2-db6d-4a64-ae14-5aefdd5fb3c7	11	14	2	Mbuyu	May 18, 2021	1286	1	42	1286	3	uuid:b7d660b2-db6d-4a64-ae14-5aefdd5fb3c7/household-information[5]	10	5	6	9	2	2		0		1	2	2	0	1	1	2	1	6	3	0	0	0	0	0	1	3		4	2	1		2	3		2	2
May 18, 2021 4:10:50 PM	uuid:b7d660b2-db6d-4a64-ae14-5aefdd5fb3c7	11	14	2	Mbuyu	May 18, 2021	1286	1	42	1286	3	uuid:b7d660b2-db6d-4a64-ae14-5aefdd5fb3c7/household-information[9]	10	9	6	11	1	2		0		1	2	2	0	1	1	2	1	6	3	0	0	0	0	0	1	3		4	2	1		2	3		2	2
May 18, 2021 4:10:50 PM	uuid:b7d660b2-db6d-4a64-ae14-5aefdd5fb3c7	11	14	2	Mbuyu	May 18, 2021	1286	1	42	1286	3	uuid:b7d660b2-db6d-4a64-ae14-5aefdd5fb3c7/household-information[7]	10	7	6	3	2	0		0		1	2	2	0	1	1	2	1	6	3	0	0	0	0	0	1	3		4	2	1		2	3		2	2
May 18, 2021 4:10:50 PM	uuid:b7d660b2-db6d-4a64-ae14-5aefdd5fb3c7	11	14	2	Mbuyu	May 18, 2021	1286	1	42	1286	3	uuid:b7d660b2-db6d-4a64-ae14-5aefdd5fb3c7/household-information[8]	10	8	6	9	1	2		0		1	2	2	0	1	1	2	1	6	3	0	0	0	0	0	1	3		4	2	1		2	3		2	2
May 18, 2021 4:10:50 PM	uuid:b7d660b2-db6d-4a64-ae14-5aefdd5fb3c7	11	14	2	Mbuyu	May 18, 2021	1286	1	42	1286	3	uuid:b7d660b2-db6d-4a64-ae14-5aefdd5fb3c7/household-information[10]	10	10	6	15	1	2		0		1	2	2	0	1	1	2	1	6	3	0	0	0	0	0	1	3		4	2	1		2	3		2	2
May 18, 2021 4:16:30 PM	uuid:7c6b568d-9649-4009-92c3-d9e77f282d48	13	15	2	Mbuyu	May 18, 2021	1287	1	25	1287	1	uuid:7c6b568d-9649-4009-92c3-d9e77f282d48/household-information[1]	1	1	1	25	1	3		3		1	1	1	3	1	1	2	0	0	1	0	0	0	1	0	1	3		4	1	5	Net	1	3		2	2
May 18, 2021 4:12:20 PM	uuid:3e7eca72-3f42-4616-8419-7fc92b64f3e9	5	11	2	Mbuyu	May 18, 2021	1289	1	27	1289	2	uuid:3e7eca72-3f42-4616-8419-7fc92b64f3e9/household-information[4]	6	4	3	16	1	2		2		1	1	1	2	1	1	2	1	2	3	1	1	2	3	1	1	3		4	3	5	steel bar	2	2		2	2
May 18, 2021 4:12:20 PM	uuid:3e7eca72-3f42-4616-8419-7fc92b64f3e9	5	11	2	Mbuyu	May 18, 2021	1289	1	27	1289	2	uuid:3e7eca72-3f42-4616-8419-7fc92b64f3e9/household-information[6]	6	6	3	14	1	2		0		1	1	1	2	1	1	2	1	2	3	1	1	2	3	1	1	3		4	3	5	steel bar	2	2		2	2
May 18, 2021 4:12:20 PM	uuid:3e7eca72-3f42-4616-8419-7fc92b64f3e9	5	11	2	Mbuyu	May 18, 2021	1289	1	27	1289	2	uuid:3e7eca72-3f42-4616-8419-7fc92b64f3e9/household-information[3]	6	3	3	5	1	1		0		1	1	1	2	1	1	2	1	2	3	1	1	2	3	1	1	3		4	3	5	steel bar	2	2		2	2
May 18, 2021 4:12:20 PM	uuid:3e7eca72-3f42-4616-8419-7fc92b64f3e9	5	11	2	Mbuyu	May 18, 2021	1289	1	27	1289	2	uuid:3e7eca72-3f42-4616-8419-7fc92b64f3e9/household-information[1]	6	1	1	30	1	2		2		1	1	1	2	1	1	2	1	2	3	1	1	2	3	1	1	3		4	3	5	steel bar	2	2		2	2
May 18, 2021 4:12:20 PM	uuid:3e7eca72-3f42-4616-8419-7fc92b64f3e9	5	11	2	Mbuyu	May 18, 2021	1289	1	27	1289	2	uuid:3e7eca72-3f42-4616-8419-7fc92b64f3e9/household-information[2]	6	2	2	27	2	3		2		1	1	1	2	1	1	2	1	2	3	1	1	2	3	1	1	3		4	3	5	steel bar	2	2		2	2
May 18, 2021 4:12:20 PM	uuid:3e7eca72-3f42-4616-8419-7fc92b64f3e9	5	11	2	Mbuyu	May 18, 2021	1289	1	27	1289	2	uuid:3e7eca72-3f42-4616-8419-7fc92b64f3e9/household-information[5]	6	5	3	19	1	2		3		1	1	1	2	1	1	2	1	2	3	1	1	2	3	1	1	3		4	3	5	steel bar	2	2		2	2
May 18, 2021 4:06:26 PM	uuid:940b48c1-40e1-4ddf-927c-c18c38ed01e0	2	12	2	Mbuyu	May 18, 2021	1290	1	81	1290	3	uuid:940b48c1-40e1-4ddf-927c-c18c38ed01e0/household-information[1]	1	1	1	58	1	0		3		1	2	2	0	1	1	2	0	0	1	0	0	0	0	0	1	1		1	1	2		1	2		2	2
May 18, 2021 4:09:07 PM	uuid:69017e0d-7d7d-4c92-93a3-fc1ef3274a23	9	13	2	Mbuyu	May 18, 2021	1291	1	60	1291	1	uuid:69017e0d-7d7d-4c92-93a3-fc1ef3274a23/household-information[1]	6	1	1	70	1	2		3		1	1	1	2	4	3	2	1	1	4	0	0	0	1	0	1	3		4	2	3		2	3		2	2
May 18, 2021 4:09:07 PM	uuid:69017e0d-7d7d-4c92-93a3-fc1ef3274a23	9	13	2	Mbuyu	May 18, 2021	1291	1	60	1291	1	uuid:69017e0d-7d7d-4c92-93a3-fc1ef3274a23/household-information[5]	6	5	2	57	2	2		3		1	2	1	2	4	1	2	1	1	4	0	0	0	1	0	4	3		0	1	5	steel bar	1	5	Processed wood	2	2
May 18, 2021 4:09:07 PM	uuid:69017e0d-7d7d-4c92-93a3-fc1ef3274a23	9	13	2	Mbuyu	May 18, 2021	1291	1	60	1291	1	uuid:69017e0d-7d7d-4c92-93a3-fc1ef3274a23/household-information[3]	6	3	6	10	1	2		6	student	1	2	1	2	4	3	2	1	1	4	0	0	0	1	0	2	3		4	2	3		2	3		2	2
May 18, 2021 4:09:07 PM	uuid:69017e0d-7d7d-4c92-93a3-fc1ef3274a23	9	13	2	Mbuyu	May 18, 2021	1291	1	60	1291	1	uuid:69017e0d-7d7d-4c92-93a3-fc1ef3274a23/household-information[2]	6	2	2	70	2	0		3		1	2	1	2	4	3	2	1	1	4	0	0	0	1	0	4	3		0	1	5	steel bar	1	5	Processed wood	2	2
May 18, 2021 4:09:07 PM	uuid:69017e0d-7d7d-4c92-93a3-fc1ef3274a23	9	13	2	Mbuyu	May 18, 2021	1291	1	60	1291	1	uuid:69017e0d-7d7d-4c92-93a3-fc1ef3274a23/household-information[4]	6	4	4	82	2	0		3		1	2	1	2	4	4	2	1	1	4	0	0	0	1	0	4	3		0	1	5	steel bar	1	5	Processed wood	2	2
May 18, 2021 4:04:14 PM	uuid:827dd83a-d141-4e91-928a-3d0b0fc5b40d	3	16	2	Mbuyu	May 18, 2021	1292	1	20	1292	2	uuid:827dd83a-d141-4e91-928a-3d0b0fc5b40d/household-information[1]	3	1	2	20	2	2		3		1	1	1	2	1	1	2	1	0	2	0	1	0	2	0	1	3		1	1	5	Net	1	3		2	2
May 18, 2021 4:04:14 PM	uuid:827dd83a-d141-4e91-928a-3d0b0fc5b40d	3	16	2	Mbuyu	May 18, 2021	1292	1	20	1292	2	uuid:827dd83a-d141-4e91-928a-3d0b0fc5b40d/household-information[3]	3	3	1	25	1	2		3		1	1	1	2	1	1	2	1	0	2	0	1	0	2	0	1	3		1	1	5	Net	1	3		2	2
May 18, 2021 4:04:14 PM	uuid:827dd83a-d141-4e91-928a-3d0b0fc5b40d	3	16	2	Mbuyu	May 18, 2021	1292	1	20	1292	2	uuid:827dd83a-d141-4e91-928a-3d0b0fc5b40d/household-information[2]	3	2	3	1	2	0		0		1	1	1	2	1	1	2	1	0	2	0	1	0	2	0	1	3		1	1	5	Net	1	3		2	2
May 18, 2021 4:10:52 PM	uuid:233cbc4e-e7c6-4216-a55f-7b9f071e22fc	4	14	2	Mbuyu	May 18, 2021	1293	1	42	1293	1	uuid:233cbc4e-e7c6-4216-a55f-7b9f071e22fc/household-information[1]	2	1	1	42	2	2		3		1	2	1	2	1	1	2	1	0	1	0	0	0	0	0	1	3		1	2	1		1	3		2	2
May 18, 2021 4:10:52 PM	uuid:233cbc4e-e7c6-4216-a55f-7b9f071e22fc	4	14	2	Mbuyu	May 18, 2021	1293	1	42	1293	1	uuid:233cbc4e-e7c6-4216-a55f-7b9f071e22fc/household-information[2]	2	2	3	2	1	0		0		1	2	1	2	1	1	2	1	0	1	0	0	0	0	0	1	3		1	2	1		1	3		2	2
May 18, 2021 4:10:53 PM	uuid:2b6e1f82-34dc-4afb-8957-822c875a9ee5	11	14	2	Mbuyu	May 18, 2021	1294	1	20	1294	3	uuid:2b6e1f82-34dc-4afb-8957-822c875a9ee5/household-information[1]	2	1	1	39	1	2		3		1	1	1	2	1	1	2	0	0	2	0	0	0	2	0	1	3		4	1	1		1	3		2	2
May 18, 2021 4:14:40 PM	uuid:1d6d2651-f163-413a-82bd-61adcf13e66b	6	17	2	Mbuyu	May 18, 2021	1296	1	38	1296	2	uuid:1d6d2651-f163-413a-82bd-61adcf13e66b/household-information[5]	9	5	3	16	1	2		3		1	2	1	2	2	2	2	2	3	4	0	0	0	0	0	1	3		4	2	2		1	2		2	2
May 18, 2021 4:14:40 PM	uuid:1d6d2651-f163-413a-82bd-61adcf13e66b	6	17	2	Mbuyu	May 18, 2021	1296	1	38	1296	2	uuid:1d6d2651-f163-413a-82bd-61adcf13e66b/household-information[2]	9	2	2	38	2	2		3		1	2	1	2	2	2	2	2	3	4	0	0	0	0	0	1	3		4	2	2		1	2		2	2
May 18, 2021 4:14:40 PM	uuid:1d6d2651-f163-413a-82bd-61adcf13e66b	6	17	2	Mbuyu	May 18, 2021	1296	1	38	1296	2	uuid:1d6d2651-f163-413a-82bd-61adcf13e66b/household-information[1]	9	1	1	46	1	2		3		1	2	1	2	2	2	2	2	3	4	0	0	0	0	0	1	3		4	2	2		1	2		2	2
May 18, 2021 4:14:40 PM	uuid:1d6d2651-f163-413a-82bd-61adcf13e66b	6	17	2	Mbuyu	May 18, 2021	1296	1	38	1296	2	uuid:1d6d2651-f163-413a-82bd-61adcf13e66b/household-information[8]	9	8	3	5	2	0		0		1	2	1	2	2	2	2	2	3	4	0	0	0	0	0	1	3		4	2	2		1	2		2	2
May 18, 2021 4:14:40 PM	uuid:1d6d2651-f163-413a-82bd-61adcf13e66b	6	17	2	Mbuyu	May 18, 2021	1296	1	38	1296	2	uuid:1d6d2651-f163-413a-82bd-61adcf13e66b/household-information[3]	9	3	3	21	2	2		0		1	2	1	2	2	1	2	2	3	4	0	0	0	0	0	1	3		4	2	2		1	2		2	2
May 18, 2021 4:14:40 PM	uuid:1d6d2651-f163-413a-82bd-61adcf13e66b	6	17	2	Mbuyu	May 18, 2021	1296	1	38	1296	2	uuid:1d6d2651-f163-413a-82bd-61adcf13e66b/household-information[6]	9	6	3	13	2	2		0		1	2	1	2	2	2	2	2	3	4	0	0	0	0	0	1	3		4	2	2		1	2		2	2
May 18, 2021 4:14:40 PM	uuid:1d6d2651-f163-413a-82bd-61adcf13e66b	6	17	2	Mbuyu	May 18, 2021	1296	1	38	1296	2	uuid:1d6d2651-f163-413a-82bd-61adcf13e66b/household-information[9]	9	9	3	3	1	0		0		1	2	1	2	2	2	2	2	3	4	0	0	0	0	0	2	3		4	1	1		1	2		2	2
May 18, 2021 4:14:40 PM	uuid:1d6d2651-f163-413a-82bd-61adcf13e66b	6	17	2	Mbuyu	May 18, 2021	1296	1	38	1296	2	uuid:1d6d2651-f163-413a-82bd-61adcf13e66b/household-information[4]	9	4	3	18	2	2		3		1	2	1	2	2	2	2	2	3	4	0	0	0	0	0	1	3		4	2	2		1	2		2	2
May 18, 2021 4:12:21 PM	uuid:61f83b76-406f-474c-b67a-f205777548c9	5	11	2	Mbuyu	May 18, 2021	1297	1	79	1297	1	uuid:61f83b76-406f-474c-b67a-f205777548c9/household-information[2]	8	2	2	60	2	2		3		1	2	2	0	1	1	2	0	5	3	0	0	0	0	0	1	3		2	4	3		2	3		2	2
May 18, 2021 4:12:21 PM	uuid:61f83b76-406f-474c-b67a-f205777548c9	5	11	2	Mbuyu	May 18, 2021	1297	1	79	1297	1	uuid:61f83b76-406f-474c-b67a-f205777548c9/household-information[7]	8	7	6	8	1	2		0		1	2	2	0	1	1	2	0	5	3	0	0	0	0	0	1	3		2	4	3		2	3		2	2
May 18, 2021 4:12:21 PM	uuid:61f83b76-406f-474c-b67a-f205777548c9	5	11	2	Mbuyu	May 18, 2021	1297	1	79	1297	1	uuid:61f83b76-406f-474c-b67a-f205777548c9/household-information[4]	8	4	6	10	1	2		0		1	2	2	0	1	1	2	0	5	3	0	0	0	0	0	1	3		2	4	3		2	3		2	2
May 18, 2021 4:12:21 PM	uuid:61f83b76-406f-474c-b67a-f205777548c9	5	11	2	Mbuyu	May 18, 2021	1297	1	79	1297	1	uuid:61f83b76-406f-474c-b67a-f205777548c9/household-information[5]	8	5	6	7	1	2		0		1	2	2	0	1	1	2	0	5	3	0	0	0	0	0	1	3		2	4	3		2	3		2	2
May 18, 2021 4:12:21 PM	uuid:61f83b76-406f-474c-b67a-f205777548c9	5	11	2	Mbuyu	May 18, 2021	1297	1	79	1297	1	uuid:61f83b76-406f-474c-b67a-f205777548c9/household-information[1]	8	1	1	79	1	0		3		1	2	2	0	1	1	2	0	5	3	0	0	0	0	0	1	3		2	4	3		2	3		2	2
May 18, 2021 4:12:21 PM	uuid:61f83b76-406f-474c-b67a-f205777548c9	5	11	2	Mbuyu	May 18, 2021	1297	1	79	1297	1	uuid:61f83b76-406f-474c-b67a-f205777548c9/household-information[6]	8	6	6	11	2	2		0		2		2	0	1	1	2	0	5	3	0	0	0	0	0	1	3		2	4	3		2	3		2	2
May 18, 2021 4:12:21 PM	uuid:61f83b76-406f-474c-b67a-f205777548c9	5	11	2	Mbuyu	May 18, 2021	1297	1	79	1297	1	uuid:61f83b76-406f-474c-b67a-f205777548c9/household-information[3]	8	3	6	18	1	2		3		1	2	2	0	1	1	2	0	5	3	0	0	0	0	0	1	3		2	4	3		2	3		2	2
May 18, 2021 4:12:21 PM	uuid:61f83b76-406f-474c-b67a-f205777548c9	5	11	2	Mbuyu	May 18, 2021	1297	1	79	1297	1	uuid:61f83b76-406f-474c-b67a-f205777548c9/household-information[8]	8	8	6	16	1	2		3		1	2	2	0	1	1	2	0	5	3	0	0	0	0	0	1	3		2	4	3		2	3		2	2
May 18, 2021 4:06:26 PM	uuid:e042c7ab-a960-4cbd-8fed-18cf3d86861a	7	12	2	Mbuyu	May 18, 2021	1298	1	45	1298	1	uuid:e042c7ab-a960-4cbd-8fed-18cf3d86861a/household-information[4]	5	4	6	10	1	2		0		1	2	2	0	1	1	2	0	4	1	0	0	0	0	0	1	3		6	2	2		2	2		2	2
May 18, 2021 4:06:26 PM	uuid:e042c7ab-a960-4cbd-8fed-18cf3d86861a	7	12	2	Mbuyu	May 18, 2021	1298	1	45	1298	1	uuid:e042c7ab-a960-4cbd-8fed-18cf3d86861a/household-information[1]	5	1	1	45	2	0		3		1	2	2	0	1	1	2	0	4	1	0	0	0	0	0	1	3		6	2	2		2	2		2	2
May 18, 2021 4:06:26 PM	uuid:e042c7ab-a960-4cbd-8fed-18cf3d86861a	7	12	2	Mbuyu	May 18, 2021	1298	1	45	1298	1	uuid:e042c7ab-a960-4cbd-8fed-18cf3d86861a/household-information[3]	5	3	6	11	1	2		0		1	2	2	0	1	1	2	0	4	1	0	0	0	0	0	1	3		6	2	2		2	2		2	2
May 18, 2021 4:06:26 PM	uuid:e042c7ab-a960-4cbd-8fed-18cf3d86861a	7	12	2	Mbuyu	May 18, 2021	1298	1	45	1298	1	uuid:e042c7ab-a960-4cbd-8fed-18cf3d86861a/household-information[2]	5	2	3	13	2	3		0		1	1	2	0	1	1	2	0	4	1	0	0	0	0	0	1	3		6	2	2		2	2		2	2
May 18, 2021 4:06:26 PM	uuid:e042c7ab-a960-4cbd-8fed-18cf3d86861a	7	12	2	Mbuyu	May 18, 2021	1298	1	45	1298	1	uuid:e042c7ab-a960-4cbd-8fed-18cf3d86861a/household-information[5]	5	5	6	5	1	0		0		1	2	2	0	1	1	2	0	4	1	0	0	0	0	0	1	3		6	2	2		2	2		2	2
May 18, 2021 4:09:09 PM	uuid:99c2befc-6d12-400b-ba73-6709ad3d7eb6	10	13	2	Mbuyu	May 18, 2021	1299	1	28	1299	1	uuid:99c2befc-6d12-400b-ba73-6709ad3d7eb6/household-information[1]	5	1	1	28	1	3		3		1	1	1	3	1	1	2	2	0	3	0	2	0	2	0	1	3		4	2	2		2	0		2	2
May 18, 2021 4:09:09 PM	uuid:99c2befc-6d12-400b-ba73-6709ad3d7eb6	10	13	2	Mbuyu	May 18, 2021	1299	1	28	1299	1	uuid:99c2befc-6d12-400b-ba73-6709ad3d7eb6/household-information[5]	5	5	3	1	2	0		0		1	1	1	3	1	1	2	2	0	3	0	2	0	2	0	1	3		4	2	2		2	0		2	2
May 18, 2021 4:09:09 PM	uuid:99c2befc-6d12-400b-ba73-6709ad3d7eb6	10	13	2	Mbuyu	May 18, 2021	1299	1	28	1299	1	uuid:99c2befc-6d12-400b-ba73-6709ad3d7eb6/household-information[3]	5	3	9	70	2	0		3		1	2	1	3	1	1	2	2	0	3	0	2	0	2	0	1	3		4	2	2		2	0		2	2
May 18, 2021 4:09:09 PM	uuid:99c2befc-6d12-400b-ba73-6709ad3d7eb6	10	13	2	Mbuyu	May 18, 2021	1299	1	28	1299	1	uuid:99c2befc-6d12-400b-ba73-6709ad3d7eb6/household-information[4]	5	4	3	3	1	0		0		1	1	1	3	1	1	2	2	0	3	0	2	0	2	0	1	3		4	2	2		2	0		2	2
May 18, 2021 4:14:46 PM	uuid:4b145058-f6de-47a7-a985-cfbd4879d49d	6	17	2	Mbuyu	May 18, 2021	1301	1	28	1301	2	uuid:4b145058-f6de-47a7-a985-cfbd4879d49d/household-information[5]	5	5	3	11	2	2		0		1	1	1	2	1	1	2	1	2	2	0	1	2	0	0	1	3		1	1	2		2	2		2	2
May 18, 2021 4:14:46 PM	uuid:4b145058-f6de-47a7-a985-cfbd4879d49d	6	17	2	Mbuyu	May 18, 2021	1301	1	28	1301	2	uuid:4b145058-f6de-47a7-a985-cfbd4879d49d/household-information[1]	5	1	1	32	1	2		3		1	2	1	2	1	1	2	1	2	2	0	1	2	0	0	1	3		1	1	2		2	2		2	2
May 18, 2021 4:14:46 PM	uuid:4b145058-f6de-47a7-a985-cfbd4879d49d	6	17	2	Mbuyu	May 18, 2021	1301	1	28	1301	2	uuid:4b145058-f6de-47a7-a985-cfbd4879d49d/household-information[3]	5	3	3	12	2	2		0		1	1	1	2	1	1	2	1	2	2	0	1	2	0	0	1	3		1	1	2		2	2		2	2
May 18, 2021 4:14:46 PM	uuid:4b145058-f6de-47a7-a985-cfbd4879d49d	6	17	2	Mbuyu	May 18, 2021	1301	1	28	1301	2	uuid:4b145058-f6de-47a7-a985-cfbd4879d49d/household-information[4]	5	4	3	5	2	1		0		1	1	1	2	1	1	2	1	2	2	0	1	2	0	0	1	3		1	1	2		2	2		2	2
May 18, 2021 4:06:27 PM	uuid:8db82ae4-2204-48fe-b07d-51f64297d351	2	12	2	Mbuyu	May 18, 2021	1303	1	45	1303	3	uuid:8db82ae4-2204-48fe-b07d-51f64297d351/household-information[1]	3	1	1	56	1	2		3		1	2	1	2	1	1	2	1	0	2	0	0	0	0	0	1	3		4	4	2		2	2		2	2
May 18, 2021 4:06:27 PM	uuid:8db82ae4-2204-48fe-b07d-51f64297d351	2	12	2	Mbuyu	May 18, 2021	1303	1	45	1303	3	uuid:8db82ae4-2204-48fe-b07d-51f64297d351/household-information[3]	3	3	3	2	1	0		0		1	2	1	2	1	1	2	1	0	2	0	0	0	0	0	1	3		4	4	2		2	2		2	2
May 18, 2021 4:09:10 PM	uuid:0f79fb13-5c3f-4013-8917-19d959e71acd	9	13	2	Mbuyu	May 18, 2021	1304	1	32	1304	1	uuid:0f79fb13-5c3f-4013-8917-19d959e71acd/household-information[3]	5	3	3	8	2	2		6	student	1	2	1	2	1	1	2	1	2	2	0	1	0	1	0	1	3		4	5	5	steel bar	2	5	Processed wood	2	2
May 18, 2021 4:09:10 PM	uuid:0f79fb13-5c3f-4013-8917-19d959e71acd	9	13	2	Mbuyu	May 18, 2021	1304	1	32	1304	1	uuid:0f79fb13-5c3f-4013-8917-19d959e71acd/household-information[1]	5	1	1	32	1	2		3		1	1	1	2	1	1	2	1	2	2	0	1	0	1	0	1	3		4	5	5	steel bar	2	5	Processed wood	2	2
May 18, 2021 4:09:10 PM	uuid:0f79fb13-5c3f-4013-8917-19d959e71acd	9	13	2	Mbuyu	May 18, 2021	1304	1	32	1304	1	uuid:0f79fb13-5c3f-4013-8917-19d959e71acd/household-information[4]	5	4	3	4	2	0		0		1	2	1	2	1	1	2	1	2	2	0	1	0	1	0	1	3		4	5	5	steel bar	2	5	Processed wood	2	2
May 18, 2021 4:09:10 PM	uuid:0f79fb13-5c3f-4013-8917-19d959e71acd	9	13	2	Mbuyu	May 18, 2021	1304	1	32	1304	1	uuid:0f79fb13-5c3f-4013-8917-19d959e71acd/household-information[2]	5	2	2	28	2	2		3		1	2	1	2	1	1	2	1	2	2	0	1	0	1	0	1	3		4	5	5	steel bar	2	5	Processed wood	2	2
May 18, 2021 4:09:10 PM	uuid:0f79fb13-5c3f-4013-8917-19d959e71acd	9	13	2	Mbuyu	May 18, 2021	1304	1	32	1304	1	uuid:0f79fb13-5c3f-4013-8917-19d959e71acd/household-information[5]	5	5	3	1	2	0		0		1	2	1	2	1	1	2	1	2	2	0	1	0	1	0	1	3		4	5	5	steel bar	2	5	Processed wood	2	2
May 18, 2021 4:04:15 PM	uuid:a89795b0-3ee9-40a4-8e88-79c0b8aff198	14	16	2	Mbuyu	May 18, 2021	1305	1	69	1305	1	uuid:a89795b0-3ee9-40a4-8e88-79c0b8aff198/household-information[4]	6	4	3	8	1	2		0		1	1	1	2	1	1	2	1	3	2	0	1	3	2	0	1	3		2	2	1		1	3		2	2
May 18, 2021 4:04:15 PM	uuid:a89795b0-3ee9-40a4-8e88-79c0b8aff198	14	16	2	Mbuyu	May 18, 2021	1305	1	69	1305	1	uuid:a89795b0-3ee9-40a4-8e88-79c0b8aff198/household-information[5]	6	5	3	5	1	2		3		1	1	1	2	1	1	2	1	3	2	0	1	3	2	0	1	3		2	2	1		1	3		2	2
May 18, 2021 4:04:15 PM	uuid:a89795b0-3ee9-40a4-8e88-79c0b8aff198	14	16	2	Mbuyu	May 18, 2021	1305	1	69	1305	1	uuid:a89795b0-3ee9-40a4-8e88-79c0b8aff198/household-information[3]	6	3	3	10	1	2		0		1	1	1	2	1	1	2	1	3	2	0	1	3	2	0	1	3		2	2	1		1	3		2	2
May 18, 2021 4:04:15 PM	uuid:a89795b0-3ee9-40a4-8e88-79c0b8aff198	14	16	2	Mbuyu	May 18, 2021	1305	1	69	1305	1	uuid:a89795b0-3ee9-40a4-8e88-79c0b8aff198/household-information[2]	6	2	2	36	2	2		3		1	1	1	2	1	1	2	1	3	2	0	1	3	2	0	1	3		2	2	1		1	3		2	2
May 18, 2021 4:04:15 PM	uuid:a89795b0-3ee9-40a4-8e88-79c0b8aff198	14	16	2	Mbuyu	May 18, 2021	1305	1	69	1305	1	uuid:a89795b0-3ee9-40a4-8e88-79c0b8aff198/household-information[1]	6	1	1	69	1	2		3		1	1	1	2	1	1	2	1	3	2	0	1	3	2	0	1	3		2	2	1		1	3		2	2
May 18, 2021 4:04:15 PM	uuid:a89795b0-3ee9-40a4-8e88-79c0b8aff198	14	16	2	Mbuyu	May 18, 2021	1305	1	69	1305	1	uuid:a89795b0-3ee9-40a4-8e88-79c0b8aff198/household-information[6]	6	6	3	1	1	0		0		1	1	1	2	1	1	2	1	3	2	0	1	3	2	0	1	3		2	2	1		1	3		2	2
May 18, 2021 4:10:54 PM	uuid:2edf4501-35ee-4174-b1d1-24b36960ccb1	4	14	2	Mbuyu	May 18, 2021	1306	1	20	1306	3	uuid:2edf4501-35ee-4174-b1d1-24b36960ccb1/household-information[1]	3	1	1	39	1	2		3		1	2	1	2	1	1	2	0	1	2	0	0	0	0	0	1	3		6	3	2		3	1		2	2
May 18, 2021 4:10:54 PM	uuid:2edf4501-35ee-4174-b1d1-24b36960ccb1	4	14	2	Mbuyu	May 18, 2021	1306	1	20	1306	3	uuid:2edf4501-35ee-4174-b1d1-24b36960ccb1/household-information[3]	3	3	3	17	1	3		0		1	2	1	2	1	1	2	0	1	2	0	0	0	0	0	1	3		6	3	2		3	1		2	2
May 18, 2021 4:06:29 PM	uuid:6dfb47d5-c8f1-44e5-a2f4-25a6a732b2d4	2	12	2	Mbuyu	May 18, 2021	1309	1	59	1309	1	uuid:6dfb47d5-c8f1-44e5-a2f4-25a6a732b2d4/household-information[3]	3	3	3	14	2	2		0		1	2	1	2	1	1	2	0	2	1	0	0	0	0	0	1	3		4	1	2		1	2		2	2
May 18, 2021 4:06:29 PM	uuid:6dfb47d5-c8f1-44e5-a2f4-25a6a732b2d4	2	12	2	Mbuyu	May 18, 2021	1309	1	59	1309	1	uuid:6dfb47d5-c8f1-44e5-a2f4-25a6a732b2d4/household-information[1]	3	1	1	59	1	2		3		1	2	1	2	1	1	2	0	2	1	0	0	0	0	0	1	3		4	1	2		1	2		2	2
May 18, 2021 4:04:16 PM	uuid:e83747d2-8e01-4cd4-97e1-2710ffabe648	3	16	2	Mbuyu	May 18, 2021	1310	1	70	1310	1	uuid:e83747d2-8e01-4cd4-97e1-2710ffabe648/household-information[3]	4	3	3	18	2	3		3		1	1	1	2	1	1	2	0	1	3	0	0	1	3	0	1	3		4	3	5	Net	2	2		2	6
May 18, 2021 4:04:16 PM	uuid:e83747d2-8e01-4cd4-97e1-2710ffabe648	3	16	2	Mbuyu	May 18, 2021	1310	1	70	1310	1	uuid:e83747d2-8e01-4cd4-97e1-2710ffabe648/household-information[1]	4	1	1	70	1	2		3		1	1	1	2	1	1	2	0	1	3	0	0	1	3	0	1	3		4	3	5	Net	2	2		2	6
May 18, 2021 4:04:16 PM	uuid:e83747d2-8e01-4cd4-97e1-2710ffabe648	3	16	2	Mbuyu	May 18, 2021	1310	1	70	1310	1	uuid:e83747d2-8e01-4cd4-97e1-2710ffabe648/household-information[4]	4	4	3	14	1	2		0		1	1	1	2	1	1	2	0	1	3	0	0	1	3	0	1	3		4	3	5	Net	2	2		2	6
May 18, 2021 4:14:42 PM	uuid:baeee57b-84cd-4784-af8a-ca891f64b6b7	16	17	2	Mbuyu	May 18, 2021	1311	1	58	1311	1	uuid:baeee57b-84cd-4784-af8a-ca891f64b6b7/household-information[3]	3	3	3	15	2	2		0		1	2	1	2	1	1	2	0	1	2	0	0	0	0	0	1	1		4	4	1		1	2		2	2
May 18, 2021 4:14:42 PM	uuid:baeee57b-84cd-4784-af8a-ca891f64b6b7	16	17	2	Mbuyu	May 18, 2021	1311	1	58	1311	1	uuid:baeee57b-84cd-4784-af8a-ca891f64b6b7/household-information[2]	3	2	2	47	2	1		3		1	2	1	2	1	1	2	0	1	2	0	0	0	0	0	1	1		4	4	1		1	2		2	2
May 18, 2021 4:14:42 PM	uuid:baeee57b-84cd-4784-af8a-ca891f64b6b7	16	17	2	Mbuyu	May 18, 2021	1311	1	58	1311	1	uuid:baeee57b-84cd-4784-af8a-ca891f64b6b7/household-information[1]	3	1	1	88	1	2		3		1	2	1	2	1	1	2	0	1	2	0	0	0	0	0	1	1		4	4	1		1	2		2	2
May 18, 2021 4:10:57 PM	uuid:02199973-1290-4cb3-a61c-76500d65835a	11	14	2	Mbuyu	May 18, 2021	1312	1	49	1312	1	uuid:02199973-1290-4cb3-a61c-76500d65835a/household-information[3]	6	3	8	78	2	0		3		1	1	1	2	1	1	2	0	3	3	0	0	3	3	0	1	3		4	4	1		3	3		2	2
May 18, 2021 4:10:57 PM	uuid:02199973-1290-4cb3-a61c-76500d65835a	11	14	2	Mbuyu	May 18, 2021	1312	1	49	1312	1	uuid:02199973-1290-4cb3-a61c-76500d65835a/household-information[4]	6	4	3	17	1	2		0		1	1	1	2	1	1	2	0	3	3	0	0	3	3	0	1	3		4	4	1		3	3		2	2
May 18, 2021 4:10:57 PM	uuid:02199973-1290-4cb3-a61c-76500d65835a	11	14	2	Mbuyu	May 18, 2021	1312	1	49	1312	1	uuid:02199973-1290-4cb3-a61c-76500d65835a/household-information[5]	6	5	3	13	2	2		0		1	1	1	2	1	1	2	0	3	3	0	0	3	3	0	1	3		4	4	1		3	3		2	2
May 18, 2021 4:10:57 PM	uuid:02199973-1290-4cb3-a61c-76500d65835a	11	14	2	Mbuyu	May 18, 2021	1312	1	49	1312	1	uuid:02199973-1290-4cb3-a61c-76500d65835a/household-information[6]	6	6	3	9	2	2		0		1	1	1	2	1	1	2	0	3	3	0	0	3	3	0	1	3		4	4	1		3	3		2	2
May 18, 2021 4:10:57 PM	uuid:02199973-1290-4cb3-a61c-76500d65835a	11	14	2	Mbuyu	May 18, 2021	1312	1	49	1312	1	uuid:02199973-1290-4cb3-a61c-76500d65835a/household-information[1]	6	1	1	49	1	2		3		1	1	1	2	1	1	2	0	3	3	0	0	3	3	0	1	3		4	4	1		3	3		2	2
May 18, 2021 4:12:24 PM	uuid:61cd42c2-5e6e-48ee-aa87-f646b2cf5cc8	5	11	2	Mbuyu	May 18, 2021	1313	1	25	1313	3	uuid:61cd42c2-5e6e-48ee-aa87-f646b2cf5cc8/household-information[2]	4	2	2	20	2	3		3		1	1	1	2	1	1	2	0	0	4	0	0	0	2	0	1	3		1	2	2		1	2		2	2
May 18, 2021 4:12:24 PM	uuid:61cd42c2-5e6e-48ee-aa87-f646b2cf5cc8	5	11	2	Mbuyu	May 18, 2021	1313	1	25	1313	3	uuid:61cd42c2-5e6e-48ee-aa87-f646b2cf5cc8/household-information[1]	4	1	1	27	1	2		3		1	1	1	2	1	1	2	0	0	4	0	0	0	2	0	1	3		1	2	2		1	2		2	2
May 18, 2021 4:12:24 PM	uuid:61cd42c2-5e6e-48ee-aa87-f646b2cf5cc8	5	11	2	Mbuyu	May 18, 2021	1313	1	25	1313	3	uuid:61cd42c2-5e6e-48ee-aa87-f646b2cf5cc8/household-information[4]	4	4	7	21	2	2		3		1	2	1	2	1	1	2	0	0	4	0	0	0	2	0	1	3		1	2	2		1	2		2	2
May 18, 2021 4:16:35 PM	uuid:e521c6e9-9339-4b5f-812c-a5de9270e0ed	13	15	2	Mbuyu	May 18, 2021	1314	1	25	1314	1	uuid:e521c6e9-9339-4b5f-812c-a5de9270e0ed/household-information[3]	6	3	4	18	1	2		6	Motorcyclist	1	1	1	2	1	1	2	0	2	2	0	0	2	2	0	1	3		4	8	5	Net	2	2		2	2
May 18, 2021 4:16:35 PM	uuid:e521c6e9-9339-4b5f-812c-a5de9270e0ed	13	15	2	Mbuyu	May 18, 2021	1314	1	25	1314	1	uuid:e521c6e9-9339-4b5f-812c-a5de9270e0ed/household-information[1]	6	1	1	25	1	2		2		1	1	1	2	1	1	2	0	2	2	0	0	2	2	0	1	3		4	8	5	Net	2	2		2	2
May 18, 2021 4:16:35 PM	uuid:e521c6e9-9339-4b5f-812c-a5de9270e0ed	13	15	2	Mbuyu	May 18, 2021	1314	1	25	1314	1	uuid:e521c6e9-9339-4b5f-812c-a5de9270e0ed/household-information[6]	6	6	3	1	2	0		0		2		1	2	1	1	2	0	2	2	0	0	2	2	0	1	3		4	8	5	Net	2	2		2	2
May 18, 2021 4:16:35 PM	uuid:e521c6e9-9339-4b5f-812c-a5de9270e0ed	13	15	2	Mbuyu	May 18, 2021	1314	1	25	1314	1	uuid:e521c6e9-9339-4b5f-812c-a5de9270e0ed/household-information[2]	6	2	2	20	2	3		2		2		1	2	1	1	2	0	2	2	0	0	2	2	0	1	3		4	8	5	Net	2	2		2	2
May 18, 2021 4:16:35 PM	uuid:e521c6e9-9339-4b5f-812c-a5de9270e0ed	13	15	2	Mbuyu	May 18, 2021	1314	1	25	1314	1	uuid:e521c6e9-9339-4b5f-812c-a5de9270e0ed/household-information[4]	6	4	3	6	2	0		0		1	1	1	2	1	1	2	0	2	2	0	0	2	2	0	1	3		4	8	5	Net	2	2		2	2
May 18, 2021 4:16:35 PM	uuid:e521c6e9-9339-4b5f-812c-a5de9270e0ed	13	15	2	Mbuyu	May 18, 2021	1314	1	25	1314	1	uuid:e521c6e9-9339-4b5f-812c-a5de9270e0ed/household-information[5]	6	5	3	4	2	0		0		1	1	1	2	1	1	2	0	2	2	0	0	2	2	0	1	3		4	8	5	Net	2	2		2	2
May 18, 2021 4:09:11 PM	uuid:8e609012-5bfe-468f-950f-9963b687e1e9	10	13	2	Mbuyu	May 18, 2021	1315	1	82	1315	1	uuid:8e609012-5bfe-468f-950f-9963b687e1e9/household-information[1]	2	1	1	82	1	0		3		1	1	2	0	1	1	2	0	0	2	0	0	0	2	0	1	3		4	4	1		2	3		2	2
May 18, 2021 4:09:11 PM	uuid:8e609012-5bfe-468f-950f-9963b687e1e9	10	13	2	Mbuyu	May 18, 2021	1315	1	82	1315	1	uuid:8e609012-5bfe-468f-950f-9963b687e1e9/household-information[2]	2	2	2	60	2	0		3		1	1	2	0	1	1	2	0	0	2	0	0	0	2	0	1	3		4	4	1		2	3		2	2
May 18, 2021 4:16:40 PM	uuid:447d7031-7be8-492f-b744-fecd9263a43a	13	15	2	Mbuyu	May 18, 2021	1316	1	42	1316	1	uuid:447d7031-7be8-492f-b744-fecd9263a43a/household-information[2]	6	2	2	35	2	2		3		1	1	1	2	1	1	2	1	2	2	0	1	2	2	0	1	3		2	4	5	Net	2	2		2	2
May 18, 2021 4:16:40 PM	uuid:447d7031-7be8-492f-b744-fecd9263a43a	13	15	2	Mbuyu	May 18, 2021	1316	1	42	1316	1	uuid:447d7031-7be8-492f-b744-fecd9263a43a/household-information[3]	6	3	3	15	2	3		0		1	1	1	2	1	1	2	1	2	2	0	1	2	2	0	1	3		2	4	5	Net	2	2		2	2
May 18, 2021 4:16:40 PM	uuid:447d7031-7be8-492f-b744-fecd9263a43a	13	15	2	Mbuyu	May 18, 2021	1316	1	42	1316	1	uuid:447d7031-7be8-492f-b744-fecd9263a43a/household-information[4]	6	4	3	12	2	2		0		1	1	1	2	1	1	2	1	2	2	0	1	2	2	0	1	3		2	4	5	Net	2	2		2	2
May 18, 2021 4:16:40 PM	uuid:447d7031-7be8-492f-b744-fecd9263a43a	13	15	2	Mbuyu	May 18, 2021	1316	1	42	1316	1	uuid:447d7031-7be8-492f-b744-fecd9263a43a/household-information[6]	6	6	3	4	2	0		0		1	1	1	2	1	1	2	1	2	2	0	1	2	2	0	1	3		2	4	5	Net	2	2		2	2
May 18, 2021 4:16:40 PM	uuid:447d7031-7be8-492f-b744-fecd9263a43a	13	15	2	Mbuyu	May 18, 2021	1316	1	42	1316	1	uuid:447d7031-7be8-492f-b744-fecd9263a43a/household-information[1]	6	1	1	42	1	2		3		1	1	1	2	1	1	2	1	2	2	0	1	2	2	0	1	3		2	4	5	Net	2	2		2	2
May 18, 2021 4:16:40 PM	uuid:447d7031-7be8-492f-b744-fecd9263a43a	13	15	2	Mbuyu	May 18, 2021	1316	1	42	1316	1	uuid:447d7031-7be8-492f-b744-fecd9263a43a/household-information[5]	6	5	3	8	2	2		0		1	1	1	2	1	1	2	1	2	2	0	1	2	2	0	1	3		2	4	5	Net	2	2		2	2
May 18, 2021 4:06:30 PM	uuid:601c7645-6efe-444b-a84b-760a7ae8de46	7	12	2	Mbuyu	May 18, 2021	1317	1	59	1317	3	uuid:601c7645-6efe-444b-a84b-760a7ae8de46/household-information[1]	4	1	1	32	1	2		3		1	2	1	2	1	1	2	0	1	3	0	0	0	0	0	1	3		3	2	2		2	2		2	2
May 18, 2021 4:06:30 PM	uuid:601c7645-6efe-444b-a84b-760a7ae8de46	7	12	2	Mbuyu	May 18, 2021	1317	1	59	1317	3	uuid:601c7645-6efe-444b-a84b-760a7ae8de46/household-information[3]	4	3	3	19	2	3		3		1	2	1	2	1	1	2	0	1	3	0	0	0	0	0	1	3		3	2	2		2	2		2	2
May 18, 2021 4:06:30 PM	uuid:601c7645-6efe-444b-a84b-760a7ae8de46	7	12	2	Mbuyu	May 18, 2021	1317	1	59	1317	3	uuid:601c7645-6efe-444b-a84b-760a7ae8de46/household-information[4]	4	4	3	21	1	3		3		1	2	1	2	1	1	2	0	1	3	0	0	0	0	0	1	3		3	2	2		2	2		2	2
May 18, 2021 4:06:30 PM	uuid:601c7645-6efe-444b-a84b-760a7ae8de46	7	12	2	Mbuyu	May 18, 2021	1317	1	59	1317	3	uuid:601c7645-6efe-444b-a84b-760a7ae8de46/household-information[2]	4	2	3	28	1	2		3		1	2	1	2	1	1	2	0	1	3	0	0	0	0	0	1	3		3	2	2		2	2		2	2
May 18, 2021 4:04:17 PM	uuid:5a63fc62-270f-419d-a22e-81cc1b4cda81	14	16	2	Mbuyu	May 18, 2021	1318	1	38	1318	1	uuid:5a63fc62-270f-419d-a22e-81cc1b4cda81/household-information[3]	4	3	3	10	2	2		0		1	1	1	2	1	1	2	1	1	2	0	1	1	2	0	1	3		4	2	1		2	5	Curtain	2	2
May 18, 2021 4:04:17 PM	uuid:5a63fc62-270f-419d-a22e-81cc1b4cda81	14	16	2	Mbuyu	May 18, 2021	1318	1	38	1318	1	uuid:5a63fc62-270f-419d-a22e-81cc1b4cda81/household-information[2]	4	2	2	21	2	2		3		1	1	1	2	1	1	2	1	1	2	0	1	1	2	0	1	3		4	2	1		2	5	Curtain	2	2
May 18, 2021 4:04:17 PM	uuid:5a63fc62-270f-419d-a22e-81cc1b4cda81	14	16	2	Mbuyu	May 18, 2021	1318	1	38	1318	1	uuid:5a63fc62-270f-419d-a22e-81cc1b4cda81/household-information[4]	4	4	3	1	2	0		0		1	1	1	2	1	1	2	1	1	2	0	1	1	2	0	1	3		4	2	1		2	5	Curtain	2	2
May 18, 2021 4:04:17 PM	uuid:5a63fc62-270f-419d-a22e-81cc1b4cda81	14	16	2	Mbuyu	May 18, 2021	1318	1	38	1318	1	uuid:5a63fc62-270f-419d-a22e-81cc1b4cda81/household-information[1]	4	1	1	38	1	2		3		1	1	1	2	1	1	2	1	1	2	0	1	1	2	0	1	3		4	2	1		2	5	Curtain	2	2
May 18, 2021 4:14:44 PM	uuid:f8ecdab0-3103-4b3e-a2e0-db51d69ce02a	6	17	2	Mbuyu	May 18, 2021	1319	1	25	1319	3	uuid:f8ecdab0-3103-4b3e-a2e0-db51d69ce02a/household-information[3]	7	3	6	25	2	3		3		1	2	2	1	1	1	2	1	2	4	0	0	0	0	0	1	3		4	4	2		2	2		2	2
May 18, 2021 4:14:44 PM	uuid:f8ecdab0-3103-4b3e-a2e0-db51d69ce02a	6	17	2	Mbuyu	May 18, 2021	1319	1	25	1319	3	uuid:f8ecdab0-3103-4b3e-a2e0-db51d69ce02a/household-information[4]	7	4	6	19	2	3		3		1	2	2	1	1	1	2	1	2	4	0	0	0	0	0	1	3		4	4	2		2	2		2	2
May 18, 2021 4:14:44 PM	uuid:f8ecdab0-3103-4b3e-a2e0-db51d69ce02a	6	17	2	Mbuyu	May 18, 2021	1319	1	25	1319	3	uuid:f8ecdab0-3103-4b3e-a2e0-db51d69ce02a/household-information[2]	7	2	2	70	2	1		3		1	2	2	1	1	1	2	1	2	4	0	0	0	0	0	1	3		4	4	2		2	2		2	2
May 18, 2021 4:14:44 PM	uuid:f8ecdab0-3103-4b3e-a2e0-db51d69ce02a	6	17	2	Mbuyu	May 18, 2021	1319	1	25	1319	3	uuid:f8ecdab0-3103-4b3e-a2e0-db51d69ce02a/household-information[6]	7	6	6	7	2	2		0		1	2	2	1	1	1	2	1	2	4	0	0	0	0	0	1	3		4	4	2		2	2		2	2
May 18, 2021 4:14:44 PM	uuid:f8ecdab0-3103-4b3e-a2e0-db51d69ce02a	6	17	2	Mbuyu	May 18, 2021	1319	1	25	1319	3	uuid:f8ecdab0-3103-4b3e-a2e0-db51d69ce02a/household-information[7]	7	7	6	3	2	0		0		1	2	2	1	1	1	2	1	2	4	0	0	0	0	0	1	3		4	4	2		2	2		2	2
May 18, 2021 4:14:44 PM	uuid:f8ecdab0-3103-4b3e-a2e0-db51d69ce02a	6	17	2	Mbuyu	May 18, 2021	1319	1	25	1319	3	uuid:f8ecdab0-3103-4b3e-a2e0-db51d69ce02a/household-information[5]	7	5	6	11	1	2		0		1	2	2	1	1	1	2	1	2	4	0	0	0	0	0	1	3		4	4	2		2	2		2	2
May 18, 2021 4:14:44 PM	uuid:f8ecdab0-3103-4b3e-a2e0-db51d69ce02a	6	17	2	Mbuyu	May 18, 2021	1319	1	25	1319	3	uuid:f8ecdab0-3103-4b3e-a2e0-db51d69ce02a/household-information[1]	7	1	1	86	1	0		3		1	2	2	1	1	1	2	1	2	4	0	0	0	0	0	1	3		4	4	2		2	2		2	2
May 18, 2021 4:10:58 PM	uuid:7de570ad-d0c8-4431-abbd-73fa7fbaffc0	4	14	2	Mbuyu	May 18, 2021	1320	1	46	1320	1	uuid:7de570ad-d0c8-4431-abbd-73fa7fbaffc0/household-information[7]	7	7	6	5	1	1		0		1	1	2	0	1	1	2	0	5	2	0	0	5	2	0	1	3		4	4	1		2	3		2	2
May 18, 2021 4:10:58 PM	uuid:7de570ad-d0c8-4431-abbd-73fa7fbaffc0	4	14	2	Mbuyu	May 18, 2021	1320	1	46	1320	1	uuid:7de570ad-d0c8-4431-abbd-73fa7fbaffc0/household-information[5]	7	5	6	15	1	2		0		1	1	2	0	1	1	2	0	5	2	0	0	5	2	0	1	3		4	4	1		2	3		2	2
May 18, 2021 4:10:58 PM	uuid:7de570ad-d0c8-4431-abbd-73fa7fbaffc0	4	14	2	Mbuyu	May 18, 2021	1320	1	46	1320	1	uuid:7de570ad-d0c8-4431-abbd-73fa7fbaffc0/household-information[2]	7	2	3	20	2	2		3		2		2	0	1	1	2	0	5	2	0	0	5	2	0	1	3		4	4	1		2	3		2	2
May 18, 2021 4:10:58 PM	uuid:7de570ad-d0c8-4431-abbd-73fa7fbaffc0	4	14	2	Mbuyu	May 18, 2021	1320	1	46	1320	1	uuid:7de570ad-d0c8-4431-abbd-73fa7fbaffc0/household-information[6]	7	6	6	10	2	2		0		1	1	2	0	1	1	2	0	5	2	0	0	5	2	0	1	3		4	4	1		2	3		2	2
May 18, 2021 4:10:58 PM	uuid:7de570ad-d0c8-4431-abbd-73fa7fbaffc0	4	14	2	Mbuyu	May 18, 2021	1320	1	46	1320	1	uuid:7de570ad-d0c8-4431-abbd-73fa7fbaffc0/household-information[3]	7	3	6	16	2	3		0		1	1	2	0	1	1	2	0	5	2	0	0	5	2	0	1	3		4	4	1		2	3		2	2
May 18, 2021 4:10:58 PM	uuid:7de570ad-d0c8-4431-abbd-73fa7fbaffc0	4	14	2	Mbuyu	May 18, 2021	1320	1	46	1320	1	uuid:7de570ad-d0c8-4431-abbd-73fa7fbaffc0/household-information[4]	7	4	6	16	1	2		0		1	1	2	0	1	1	2	0	5	2	0	0	5	2	0	1	3		4	4	1		2	3		2	2
May 18, 2021 4:12:25 PM	uuid:e4623a0e-e222-45a7-aa2b-f3e4c7305b03	5	11	2	Mbuyu	May 18, 2021	1321	1	38	1321	1	uuid:e4623a0e-e222-45a7-aa2b-f3e4c7305b03/household-information[6]	7	6	3	8	1	2		0		1	1	1	2	2	1	2	1	4	2	0	1	4	2	0	1	3		4	1	2		1	2		2	2
May 18, 2021 4:12:25 PM	uuid:e4623a0e-e222-45a7-aa2b-f3e4c7305b03	5	11	2	Mbuyu	May 18, 2021	1321	1	38	1321	1	uuid:e4623a0e-e222-45a7-aa2b-f3e4c7305b03/household-information[7]	7	7	3	4	1	0		0		1	1	1	2	2	1	2	1	4	2	0	1	4	2	0	2	3		4	1	2		1	3		2	2
May 18, 2021 4:12:25 PM	uuid:e4623a0e-e222-45a7-aa2b-f3e4c7305b03	5	11	2	Mbuyu	May 18, 2021	1321	1	38	1321	1	uuid:e4623a0e-e222-45a7-aa2b-f3e4c7305b03/household-information[4]	7	4	3	13	1	2		0		1	1	1	2	2	2	2	1	4	2	0	1	4	2	0	2	3		4	1	2		1	3		2	2
May 18, 2021 4:12:25 PM	uuid:e4623a0e-e222-45a7-aa2b-f3e4c7305b03	5	11	2	Mbuyu	May 18, 2021	1321	1	38	1321	1	uuid:e4623a0e-e222-45a7-aa2b-f3e4c7305b03/household-information[1]	7	1	1	38	1	2		3		1	1	1	2	2	1	2	1	4	2	0	1	4	2	0	2	3		4	1	2		1	3		2	2
May 18, 2021 4:12:25 PM	uuid:e4623a0e-e222-45a7-aa2b-f3e4c7305b03	5	11	2	Mbuyu	May 18, 2021	1321	1	38	1321	1	uuid:e4623a0e-e222-45a7-aa2b-f3e4c7305b03/household-information[3]	7	3	3	15	2	2		0		1	1	1	2	2	1	2	1	4	2	0	1	4	2	0	2	3		4	1	2		1	3		2	2
May 18, 2021 4:12:25 PM	uuid:e4623a0e-e222-45a7-aa2b-f3e4c7305b03	5	11	2	Mbuyu	May 18, 2021	1321	1	38	1321	1	uuid:e4623a0e-e222-45a7-aa2b-f3e4c7305b03/household-information[5]	7	5	3	10	2	2		0		1	1	1	2	2	1	2	1	4	2	0	1	4	2	0	2	3		4	1	2		1	3		2	2
May 18, 2021 4:09:12 PM	uuid:49a74072-f394-41d3-941f-b743d6323ae4	9	13	2	Mbuyu	May 18, 2021	1322	1	68	1322	1	uuid:49a74072-f394-41d3-941f-b743d6323ae4/household-information[6]	10	6	6	10	2	2		6	student	1	2	1	2	1	1	2	2	4	4	0	0	0	0	0	1	3		4	1	5	steel bar	2	3		2	2
May 18, 2021 4:09:12 PM	uuid:49a74072-f394-41d3-941f-b743d6323ae4	9	13	2	Mbuyu	May 18, 2021	1322	1	68	1322	1	uuid:49a74072-f394-41d3-941f-b743d6323ae4/household-information[7]	10	7	6	6	1	2		6	student	1	2	1	2	1	1	2	2	4	4	0	0	0	0	0	1	3		4	1	5	steel bar	2	3		2	2
May 18, 2021 4:09:12 PM	uuid:49a74072-f394-41d3-941f-b743d6323ae4	9	13	2	Mbuyu	May 18, 2021	1322	1	68	1322	1	uuid:49a74072-f394-41d3-941f-b743d6323ae4/household-information[2]	10	2	11	92	2	0		0		1	2	1	2	1	1	2	2	4	4	0	0	0	0	0	1	3		4	1	5	steel bar	2	3		2	2
May 18, 2021 4:09:12 PM	uuid:49a74072-f394-41d3-941f-b743d6323ae4	9	13	2	Mbuyu	May 18, 2021	1322	1	68	1322	1	uuid:49a74072-f394-41d3-941f-b743d6323ae4/household-information[10]	10	10	3	32	1	2		3		1	2	1	2	1	1	2	2	4	4	0	0	0	0	0	1	3		4	1	5	steel bar	2	3		2	2
May 18, 2021 4:09:12 PM	uuid:49a74072-f394-41d3-941f-b743d6323ae4	9	13	2	Mbuyu	May 18, 2021	1322	1	68	1322	1	uuid:49a74072-f394-41d3-941f-b743d6323ae4/household-information[1]	10	1	1	68	1	2		3		1	2	1	2	1	1	2	2	4	4	0	0	0	0	0	1	3		4	1	5	steel bar	2	3		2	2
May 18, 2021 4:09:12 PM	uuid:49a74072-f394-41d3-941f-b743d6323ae4	9	13	2	Mbuyu	May 18, 2021	1322	1	68	1322	1	uuid:49a74072-f394-41d3-941f-b743d6323ae4/household-information[8]	10	8	6	3	1	0		0		1	2	1	2	1	1	2	2	4	4	0	0	0	0	0	1	3		4	1	5	steel bar	2	3		2	2
May 18, 2021 4:09:12 PM	uuid:49a74072-f394-41d3-941f-b743d6323ae4	9	13	2	Mbuyu	May 18, 2021	1322	1	68	1322	1	uuid:49a74072-f394-41d3-941f-b743d6323ae4/household-information[4]	10	4	6	17	2	2		0		1	2	1	2	1	1	2	2	4	4	0	0	0	0	0	1	3		4	1	5	steel bar	2	3		2	2
May 18, 2021 4:09:12 PM	uuid:49a74072-f394-41d3-941f-b743d6323ae4	9	13	2	Mbuyu	May 18, 2021	1322	1	68	1322	1	uuid:49a74072-f394-41d3-941f-b743d6323ae4/household-information[3]	10	3	3	37	2	2		3		1	2	1	2	1	1	2	2	4	4	0	0	0	0	0	1	3		4	1	5	steel bar	2	3		2	2
May 18, 2021 4:09:12 PM	uuid:49a74072-f394-41d3-941f-b743d6323ae4	9	13	2	Mbuyu	May 18, 2021	1322	1	68	1322	1	uuid:49a74072-f394-41d3-941f-b743d6323ae4/household-information[5]	10	5	6	13	2	2		6	student	1	2	1	2	1	1	2	2	4	4	0	0	0	0	0	1	3		4	1	5	steel bar	2	3		2	2
May 18, 2021 4:06:31 PM	uuid:385c826f-b6c3-4bb4-8be9-a36502a8e70e	7	12	2	Mbuyu	May 18, 2021	1323	1	64	1323	1	uuid:385c826f-b6c3-4bb4-8be9-a36502a8e70e/household-information[4]	7	4	6	12	1	2		0		1	2	1	0	1	1	2	0	5	2	0	0	0	2	0	1	3		4	2	2		2	2		2	2
May 18, 2021 4:06:31 PM	uuid:385c826f-b6c3-4bb4-8be9-a36502a8e70e	7	12	2	Mbuyu	May 18, 2021	1323	1	64	1323	1	uuid:385c826f-b6c3-4bb4-8be9-a36502a8e70e/household-information[5]	7	5	6	9	1	2		0		1	2	1	0	1	1	2	0	5	2	0	0	0	2	0	1	3		4	2	2		2	2		2	2
May 18, 2021 4:06:31 PM	uuid:385c826f-b6c3-4bb4-8be9-a36502a8e70e	7	12	2	Mbuyu	May 18, 2021	1323	1	64	1323	1	uuid:385c826f-b6c3-4bb4-8be9-a36502a8e70e/household-information[6]	7	6	6	14	2	2		0		1	2	1	0	1	1	2	0	5	2	0	0	0	2	0	1	3		4	2	2		2	2		2	2
May 18, 2021 4:06:31 PM	uuid:385c826f-b6c3-4bb4-8be9-a36502a8e70e	7	12	2	Mbuyu	May 18, 2021	1323	1	64	1323	1	uuid:385c826f-b6c3-4bb4-8be9-a36502a8e70e/household-information[7]	7	7	6	5	2	0		0		1	2	1	0	1	1	2	0	5	2	0	0	0	2	0	1	3		4	2	2		2	2		2	2
May 18, 2021 4:06:31 PM	uuid:385c826f-b6c3-4bb4-8be9-a36502a8e70e	7	12	2	Mbuyu	May 18, 2021	1323	1	64	1323	1	uuid:385c826f-b6c3-4bb4-8be9-a36502a8e70e/household-information[2]	7	2	2	57	2	0		3		1	1	1	0	1	1	2	0	5	2	0	0	0	2	0	1	3		4	2	2		2	2		2	2
May 18, 2021 4:06:31 PM	uuid:385c826f-b6c3-4bb4-8be9-a36502a8e70e	7	12	2	Mbuyu	May 18, 2021	1323	1	64	1323	1	uuid:385c826f-b6c3-4bb4-8be9-a36502a8e70e/household-information[3]	7	3	6	14	1	2		0		1	2	1	0	1	1	2	0	5	2	0	0	0	2	0	1	3		4	2	2		2	2		2	2
May 19, 2021 1:18:24 PM	uuid:c1bab461-fc01-466b-b1bf-32000c839b14	5	11	2	Mkwazu	May 19, 2021	1324	1	51	1324	1	uuid:c1bab461-fc01-466b-b1bf-32000c839b14/household-information[1]	2	1	1	51	1	2		3		1	2	1	2	1	1	2	0	0	2	0	0	0	0	0	1	3		4	4	5	steel bar	4	5	Iron sheet & stick	2	2
May 19, 2021 1:18:24 PM	uuid:c1bab461-fc01-466b-b1bf-32000c839b14	5	11	2	Mkwazu	May 19, 2021	1324	1	51	1324	1	uuid:c1bab461-fc01-466b-b1bf-32000c839b14/household-information[2]	2	2	4	44	1	0		3		1	2	1	2	1	1	2	0	0	2	0	0	0	0	0	1	3		4	4	5	steel bar	4	5	Iron sheet & stick	2	2
May 18, 2021 4:06:32 PM	uuid:a070c4ea-2ca1-44ad-9fcc-b6e53696b86f	2	12	2	Mbuyu	May 18, 2021	1325	1	34	1325	1	uuid:a070c4ea-2ca1-44ad-9fcc-b6e53696b86f/household-information[1]	9	1	1	34	1	2		3		1	1	1	2	1	1	2	3	2	4	0	3	2	4	0	1	3		4	4	2		2	2		2	2
May 18, 2021 4:06:32 PM	uuid:a070c4ea-2ca1-44ad-9fcc-b6e53696b86f	2	12	2	Mbuyu	May 18, 2021	1325	1	34	1325	1	uuid:a070c4ea-2ca1-44ad-9fcc-b6e53696b86f/household-information[5]	9	5	9	36	1	2		3		1	1	1	2	1	1	2	3	2	4	0	3	2	4	0	1	3		4	4	2		2	2		2	2
May 18, 2021 4:06:32 PM	uuid:a070c4ea-2ca1-44ad-9fcc-b6e53696b86f	2	12	2	Mbuyu	May 18, 2021	1325	1	34	1325	1	uuid:a070c4ea-2ca1-44ad-9fcc-b6e53696b86f/household-information[6]	9	6	7	27	2	2		3		1	1	1	2	1	1	2	3	2	4	0	3	2	4	0	1	3		4	4	2		2	2		2	2
May 18, 2021 4:06:32 PM	uuid:a070c4ea-2ca1-44ad-9fcc-b6e53696b86f	2	12	2	Mbuyu	May 18, 2021	1325	1	34	1325	1	uuid:a070c4ea-2ca1-44ad-9fcc-b6e53696b86f/household-information[8]	9	8	3	4	2	0		0		1	1	1	2	1	1	2	3	2	4	0	3	2	4	0	1	3		4	4	2		2	2		2	2
May 18, 2021 4:06:32 PM	uuid:a070c4ea-2ca1-44ad-9fcc-b6e53696b86f	2	12	2	Mbuyu	May 18, 2021	1325	1	34	1325	1	uuid:a070c4ea-2ca1-44ad-9fcc-b6e53696b86f/household-information[9]	9	9	3	2	1	0		0		1	1	1	2	1	1	2	3	2	4	0	3	2	4	0	1	3		4	4	2		2	2		2	2
May 18, 2021 4:06:32 PM	uuid:a070c4ea-2ca1-44ad-9fcc-b6e53696b86f	2	12	2	Mbuyu	May 18, 2021	1325	1	34	1325	1	uuid:a070c4ea-2ca1-44ad-9fcc-b6e53696b86f/household-information[2]	9	2	2	25	2	2		3		1	1	1	2	1	1	2	3	2	4	0	3	2	4	0	1	3		4	4	2		2	2		2	2
May 18, 2021 4:06:32 PM	uuid:a070c4ea-2ca1-44ad-9fcc-b6e53696b86f	2	12	2	Mbuyu	May 18, 2021	1325	1	34	1325	1	uuid:a070c4ea-2ca1-44ad-9fcc-b6e53696b86f/household-information[7]	9	7	3	11	2	2		3		1	1	1	2	1	1	2	3	2	4	0	3	2	4	0	1	3		4	4	2		2	2		2	2
May 18, 2021 4:06:32 PM	uuid:a070c4ea-2ca1-44ad-9fcc-b6e53696b86f	2	12	2	Mbuyu	May 18, 2021	1325	1	34	1325	1	uuid:a070c4ea-2ca1-44ad-9fcc-b6e53696b86f/household-information[4]	9	4	3	3	1	0		0		1	1	1	2	1	1	2	3	2	4	0	3	2	4	0	1	3		4	4	2		2	2		2	2
May 18, 2021 4:04:17 PM	uuid:c8ec0997-d2c3-4c16-a6a3-8537650a6f35	14	16	2	Mbuyu	May 18, 2021	1326	1	35	1326	1	uuid:c8ec0997-d2c3-4c16-a6a3-8537650a6f35/household-information[1]	1	1	1	35	1	2		3		1	1	1	2	1	1	2	0	0	1	0	0	0	1	0	1	3		2	3	5	Net	1	2		2	2
May 18, 2021 4:14:45 PM	uuid:02060f57-0b75-4c29-aea1-b944694fc810	16	17	2	Mbuyu	May 18, 2021	1327	1	50	1327	1	uuid:02060f57-0b75-4c29-aea1-b944694fc810/household-information[1]	1	1	1	50	2	1		1		1	1	2	1	1	1	2	0	0	1	0	0	0	1	0	1	3		4	1	3		1	0		2	6
May 19, 2021 1:21:35 PM	uuid:e660ee46-1d9b-4f85-8a94-1cc2e42e8ba9	7	12	2	Mkwazu	May 19, 2021	1328	1	46	1328	1	uuid:e660ee46-1d9b-4f85-8a94-1cc2e42e8ba9/household-information[3]	3	3	3	13	2	2		0		1	1	1	2	1	1	2	0	3	2	0	0	1	2	0	1	3		4	2	2		1	2		2	2
May 19, 2021 1:21:35 PM	uuid:e660ee46-1d9b-4f85-8a94-1cc2e42e8ba9	7	12	2	Mkwazu	May 19, 2021	1328	1	46	1328	1	uuid:e660ee46-1d9b-4f85-8a94-1cc2e42e8ba9/household-information[2]	3	2	2	41	2	2		3		1	1	1	2	1	1	2	0	3	2	0	0	1	2	0	1	3		4	2	2		1	2		2	2
May 18, 2021 4:12:26 PM	uuid:eb1bf760-8178-4983-9a58-4bbb53ea0d70	5	11	2	Mbuyu	May 18, 2021	1329	1	38	1329	3	uuid:eb1bf760-8178-4983-9a58-4bbb53ea0d70/household-information[2]	2	2	3	19	2	0		3		1	1	1	2	1	1	2	0	0	2	0	0	0	2	0	1	3		4	4	3		1	3		2	5
May 19, 2021 1:12:07 PM	uuid:2358ab2b-1ffd-460d-93da-e0c9abc43938	10	13	2	Mkwazu	May 19, 2021	1331	1	43	1331	1	uuid:2358ab2b-1ffd-460d-93da-e0c9abc43938/household-information[1]	3	1	1	43	1	2		3		1	1	1	2	1	1	2	1	0	2	0	1	0	2	0	1	3		3	4	5	Net	1	3		2	2
May 19, 2021 1:12:07 PM	uuid:2358ab2b-1ffd-460d-93da-e0c9abc43938	10	13	2	Mkwazu	May 19, 2021	1331	1	43	1331	1	uuid:2358ab2b-1ffd-460d-93da-e0c9abc43938/household-information[2]	3	2	2	30	2	2		3		1	1	1	2	1	1	2	1	0	2	0	1	0	2	0	1	3		3	4	5	Net	1	3		2	2
May 18, 2021 4:04:18 PM	uuid:5fc0b3a5-fd40-4a16-8d71-5a69d9c761ff	3	16	2	Mbuyu	May 18, 2021	1332	1	80	1332	1	uuid:5fc0b3a5-fd40-4a16-8d71-5a69d9c761ff/household-information[5]	6	5	3	31	2	3		3		1	2	1	2	1	1	2	0	3	4	0	0	0	0	0	1	3		2	2	5	Steel bar & net	1	2		2	2
May 18, 2021 4:04:18 PM	uuid:5fc0b3a5-fd40-4a16-8d71-5a69d9c761ff	3	16	2	Mbuyu	May 18, 2021	1332	1	80	1332	1	uuid:5fc0b3a5-fd40-4a16-8d71-5a69d9c761ff/household-information[1]	6	1	1	80	1	0		3		1	2	1	2	1	1	2	0	3	4	0	0	0	0	0	1	3		2	2	5	Steel bar & net	1	2		2	2
May 18, 2021 4:04:18 PM	uuid:5fc0b3a5-fd40-4a16-8d71-5a69d9c761ff	3	16	2	Mbuyu	May 18, 2021	1332	1	80	1332	1	uuid:5fc0b3a5-fd40-4a16-8d71-5a69d9c761ff/household-information[3]	6	3	6	7	1	2		0		1	2	1	2	1	1	2	0	3	4	0	0	0	0	0	1	3		2	2	5	Steel bar & net	1	2		2	2
May 18, 2021 4:04:18 PM	uuid:5fc0b3a5-fd40-4a16-8d71-5a69d9c761ff	3	16	2	Mbuyu	May 18, 2021	1332	1	80	1332	1	uuid:5fc0b3a5-fd40-4a16-8d71-5a69d9c761ff/household-information[4]	6	4	6	7	2	2		0		1	2	1	2	1	1	2	0	3	4	0	0	0	0	0	1	3		2	2	5	Steel bar & net	1	2		2	2
May 18, 2021 4:04:18 PM	uuid:5fc0b3a5-fd40-4a16-8d71-5a69d9c761ff	3	16	2	Mbuyu	May 18, 2021	1332	1	80	1332	1	uuid:5fc0b3a5-fd40-4a16-8d71-5a69d9c761ff/household-information[6]	6	6	3	47	2	2		3		1	2	1	2	1	1	2	0	3	4	0	0	0	0	0	1	3		2	2	5	Steel bar & net	1	2		2	2
May 18, 2021 4:04:18 PM	uuid:5fc0b3a5-fd40-4a16-8d71-5a69d9c761ff	3	16	2	Mbuyu	May 18, 2021	1332	1	80	1332	1	uuid:5fc0b3a5-fd40-4a16-8d71-5a69d9c761ff/household-information[7]	6	7	6	12	1	2		0		1	2	1	2	1	1	2	0	3	4	0	0	0	0	0	1	3		2	2	5	Steel bar & net	1	2		2	2
May 18, 2021 4:04:18 PM	uuid:5fc0b3a5-fd40-4a16-8d71-5a69d9c761ff	3	16	2	Mbuyu	May 18, 2021	1332	1	80	1332	1	uuid:5fc0b3a5-fd40-4a16-8d71-5a69d9c761ff/household-information[2]	6	2	2	62	2	0		3		1	2	1	2	1	1	2	0	3	4	0	0	0	0	0	1	3		2	2	5	Steel bar & net	1	2		2	2
May 19, 2021 1:17:23 PM	uuid:aee99409-2b80-421c-a545-284dbd7b21f4	11	14	2	Mkwazu	May 19, 2021	1333	1	73	1333	1	uuid:aee99409-2b80-421c-a545-284dbd7b21f4/household-information[2]	4	2	2	67	2	2		3		2		1	2	1	1	2	0	1	3	0	0	0	0	0	1	3		5	1	1		1	2		2	2
May 19, 2021 1:17:23 PM	uuid:aee99409-2b80-421c-a545-284dbd7b21f4	11	14	2	Mkwazu	May 19, 2021	1333	1	73	1333	1	uuid:aee99409-2b80-421c-a545-284dbd7b21f4/household-information[4]	4	4	3	20	1	2		3		1	2	1	2	1	1	2	0	1	3	0	0	0	0	0	1	3		5	1	1		1	2		2	2
May 19, 2021 1:17:23 PM	uuid:aee99409-2b80-421c-a545-284dbd7b21f4	11	14	2	Mkwazu	May 19, 2021	1333	1	73	1333	1	uuid:aee99409-2b80-421c-a545-284dbd7b21f4/household-information[1]	4	1	1	73	1	2		3		1	2	1	2	1	1	2	0	1	3	0	0	0	0	0	1	3		5	1	1		1	2		2	2
May 19, 2021 1:17:38 PM	uuid:c3396438-af4b-45db-98f7-082c54db1c2b	13	15	2	Mkwazu	May 19, 2021	1334	1	40	1334	1	uuid:c3396438-af4b-45db-98f7-082c54db1c2b/household-information[1]	3	1	1	40	2	2		3		1	2	1	2	1	1	2	0	1	2	0	0	0	0	0	1	3		4	3	5	Net	2	3		2	2
May 19, 2021 1:17:38 PM	uuid:c3396438-af4b-45db-98f7-082c54db1c2b	13	15	2	Mkwazu	May 19, 2021	1334	1	40	1334	1	uuid:c3396438-af4b-45db-98f7-082c54db1c2b/household-information[3]	3	3	3	19	1	3		3		1	2	1	2	1	1	2	0	1	2	0	0	0	0	0	1	3		4	3	5	Net	2	3		2	2
May 19, 2021 1:17:38 PM	uuid:c3396438-af4b-45db-98f7-082c54db1c2b	13	15	2	Mkwazu	May 19, 2021	1334	1	40	1334	1	uuid:c3396438-af4b-45db-98f7-082c54db1c2b/household-information[2]	3	2	3	8	1	2		0		1	2	1	2	1	1	2	0	1	2	0	0	0	0	0	1	3		4	3	5	Net	2	3		2	2
May 18, 2021 4:12:27 PM	uuid:adb6ee5b-425e-48fe-8d13-1b9080b4cb8c	5	11	2	Mbuyu	May 18, 2021	1335	1	30	1335	2	uuid:adb6ee5b-425e-48fe-8d13-1b9080b4cb8c/household-information[4]	5	4	3	8	2	0		0		1	1	1	2	1	1	2	0	3	2	1	0	3	2	1	1	3		3	1	5	steel bar	2	3		2	2
May 18, 2021 4:12:27 PM	uuid:adb6ee5b-425e-48fe-8d13-1b9080b4cb8c	5	11	2	Mbuyu	May 18, 2021	1335	1	30	1335	2	uuid:adb6ee5b-425e-48fe-8d13-1b9080b4cb8c/household-information[1]	5	1	1	41	1	2		3		1	1	1	2	1	1	2	0	3	2	1	0	3	2	1	1	3		3	1	5	steel bar	2	3		2	2
May 18, 2021 4:12:27 PM	uuid:adb6ee5b-425e-48fe-8d13-1b9080b4cb8c	5	11	2	Mbuyu	May 18, 2021	1335	1	30	1335	2	uuid:adb6ee5b-425e-48fe-8d13-1b9080b4cb8c/household-information[2]	5	2	2	30	2	2		3		1	1	1	2	1	1	2	0	3	2	1	0	3	2	1	1	3		3	1	5	steel bar	2	3		2	2
May 18, 2021 4:12:27 PM	uuid:adb6ee5b-425e-48fe-8d13-1b9080b4cb8c	5	11	2	Mbuyu	May 18, 2021	1335	1	30	1335	2	uuid:adb6ee5b-425e-48fe-8d13-1b9080b4cb8c/household-information[3]	5	3	3	11	2	2		0		1	1	1	2	1	1	2	0	3	2	1	0	3	2	1	1	3		3	1	5	steel bar	2	3		2	2
May 18, 2021 4:12:27 PM	uuid:adb6ee5b-425e-48fe-8d13-1b9080b4cb8c	5	11	2	Mbuyu	May 18, 2021	1335	1	30	1335	2	uuid:adb6ee5b-425e-48fe-8d13-1b9080b4cb8c/household-information[5]	5	5	3	6	1	0		0		1	1	1	2	1	1	2	0	3	2	1	0	3	2	1	1	3		3	1	5	steel bar	2	3		2	2
May 19, 2021 1:11:36 PM	uuid:b79a6648-dc71-4d43-bcff-a344b3fbf48e	3	16	2	Mkwazu	May 19, 2021	1336	1	63	1336	1	uuid:b79a6648-dc71-4d43-bcff-a344b3fbf48e/household-information[8]	9	8	6	9	1	2		0		1	1	2	0	1	1	2	1	6	2	0	1	6	2	0	1	3		6	2	5	Net	2	2		2	2
May 19, 2021 1:11:36 PM	uuid:b79a6648-dc71-4d43-bcff-a344b3fbf48e	3	16	2	Mkwazu	May 19, 2021	1336	1	63	1336	1	uuid:b79a6648-dc71-4d43-bcff-a344b3fbf48e/household-information[6]	9	6	6	8	1	2		0		1	1	2	0	1	1	2	1	6	2	0	1	6	2	0	1	3		6	2	5	Net	2	2		2	2
May 19, 2021 1:11:36 PM	uuid:b79a6648-dc71-4d43-bcff-a344b3fbf48e	3	16	2	Mkwazu	May 19, 2021	1336	1	63	1336	1	uuid:b79a6648-dc71-4d43-bcff-a344b3fbf48e/household-information[4]	9	4	6	12	1	2		0		1	1	2	0	1	1	2	1	6	2	0	1	6	2	0	1	3		6	2	5	Net	2	2		2	2
May 19, 2021 1:11:36 PM	uuid:b79a6648-dc71-4d43-bcff-a344b3fbf48e	3	16	2	Mkwazu	May 19, 2021	1336	1	63	1336	1	uuid:b79a6648-dc71-4d43-bcff-a344b3fbf48e/household-information[3]	9	3	6	13	2	2		0		1	1	2	0	1	1	2	1	6	2	0	1	6	2	0	1	3		6	2	5	Net	2	2		2	2
May 19, 2021 1:11:36 PM	uuid:b79a6648-dc71-4d43-bcff-a344b3fbf48e	3	16	2	Mkwazu	May 19, 2021	1336	1	63	1336	1	uuid:b79a6648-dc71-4d43-bcff-a344b3fbf48e/household-information[7]	9	7	6	7	2	1		0		1	1	2	0	1	1	2	1	6	2	0	1	6	2	0	1	3		6	2	5	Net	2	2		2	2
May 19, 2021 1:11:36 PM	uuid:b79a6648-dc71-4d43-bcff-a344b3fbf48e	3	16	2	Mkwazu	May 19, 2021	1336	1	63	1336	1	uuid:b79a6648-dc71-4d43-bcff-a344b3fbf48e/household-information[2]	9	2	3	38	2	2		3		1	1	2	0	1	1	2	1	6	2	0	1	6	2	0	1	3		6	2	5	Net	2	2		2	2
May 19, 2021 1:11:36 PM	uuid:b79a6648-dc71-4d43-bcff-a344b3fbf48e	3	16	2	Mkwazu	May 19, 2021	1336	1	63	1336	1	uuid:b79a6648-dc71-4d43-bcff-a344b3fbf48e/household-information[1]	9	1	1	63	2	0		3		1	1	2	0	1	1	2	1	6	2	0	1	6	2	0	1	3		6	2	5	Net	2	2		2	2
May 19, 2021 1:11:36 PM	uuid:b79a6648-dc71-4d43-bcff-a344b3fbf48e	3	16	2	Mkwazu	May 19, 2021	1336	1	63	1336	1	uuid:b79a6648-dc71-4d43-bcff-a344b3fbf48e/household-information[5]	9	5	6	12	1	2		0		1	1	2	0	1	1	2	1	6	2	0	1	6	2	0	1	3		6	2	5	Net	2	2		2	2
May 19, 2021 1:11:36 PM	uuid:b79a6648-dc71-4d43-bcff-a344b3fbf48e	3	16	2	Mkwazu	May 19, 2021	1336	1	63	1336	1	uuid:b79a6648-dc71-4d43-bcff-a344b3fbf48e/household-information[9]	9	9	6	2	1	0		0		1	1	2	0	1	1	2	1	6	2	0	1	6	2	0	1	3		6	2	5	Net	2	2		2	2
May 19, 2021 1:07:15 PM	uuid:5f1facd7-737b-4e32-9336-b2c7cc687681	16	17	2	Mkwazu	May 19, 2021	1337	1	30	1337	1	uuid:5f1facd7-737b-4e32-9336-b2c7cc687681/household-information[4]	4	4	3	1	2	0		0		1	2	1	2	1	1	2	1	2	1	0	0	0	0	0	1	3		4	1	2		1	2		2	2
May 19, 2021 1:07:15 PM	uuid:5f1facd7-737b-4e32-9336-b2c7cc687681	16	17	2	Mkwazu	May 19, 2021	1337	1	30	1337	1	uuid:5f1facd7-737b-4e32-9336-b2c7cc687681/household-information[3]	4	3	3	7	1	2		0		1	2	1	2	1	1	2	1	2	1	0	0	0	0	0	1	3		4	1	2		1	2		2	2
May 19, 2021 1:07:15 PM	uuid:5f1facd7-737b-4e32-9336-b2c7cc687681	16	17	2	Mkwazu	May 19, 2021	1337	1	30	1337	1	uuid:5f1facd7-737b-4e32-9336-b2c7cc687681/household-information[1]	4	1	1	30	2	2		3		1	2	1	2	1	1	2	1	2	1	0	0	0	0	0	1	3		4	1	2		1	2		2	2
May 19, 2021 1:07:15 PM	uuid:5f1facd7-737b-4e32-9336-b2c7cc687681	16	17	2	Mkwazu	May 19, 2021	1337	1	30	1337	1	uuid:5f1facd7-737b-4e32-9336-b2c7cc687681/household-information[2]	4	2	3	12	2	2		0		1	2	1	2	1	1	2	1	2	1	0	0	0	0	0	1	3		4	1	2		1	2		2	2
May 19, 2021 1:18:27 PM	uuid:af1403d7-914c-4f46-a28a-bf54dc97d78a	1	11	2	Mkwazu	May 19, 2021	1338	1	52	1338	2	uuid:af1403d7-914c-4f46-a28a-bf54dc97d78a/household-information[5]	7	5	3	12	1	2		0		1	1	1	2	1	1	2	1	2	4	1	1	2	4	1	1	3		4	4	3		3	5	Iron sheet	2	6
May 19, 2021 1:18:27 PM	uuid:af1403d7-914c-4f46-a28a-bf54dc97d78a	1	11	2	Mkwazu	May 19, 2021	1338	1	52	1338	2	uuid:af1403d7-914c-4f46-a28a-bf54dc97d78a/household-information[3]	7	3	3	21	2	2		3		1	2	1	2	1	1	2	1	2	4	1	1	2	4	1	1	3		4	4	3		3	5	Iron sheet	2	6
May 19, 2021 1:18:27 PM	uuid:af1403d7-914c-4f46-a28a-bf54dc97d78a	1	11	2	Mkwazu	May 19, 2021	1338	1	52	1338	2	uuid:af1403d7-914c-4f46-a28a-bf54dc97d78a/household-information[1]	7	1	1	54	1	2		3		1	1	1	2	1	1	2	1	2	4	1	1	2	4	1	1	3		4	4	3		3	5	Iron sheet	2	6
May 19, 2021 1:18:27 PM	uuid:af1403d7-914c-4f46-a28a-bf54dc97d78a	1	11	2	Mkwazu	May 19, 2021	1338	1	52	1338	2	uuid:af1403d7-914c-4f46-a28a-bf54dc97d78a/household-information[6]	7	6	3	14	1	2		0		1	1	1	2	1	1	2	1	2	4	1	1	2	4	1	1	3		4	4	3		3	5	Iron sheet	2	6
May 19, 2021 1:18:27 PM	uuid:af1403d7-914c-4f46-a28a-bf54dc97d78a	1	11	2	Mkwazu	May 19, 2021	1338	1	52	1338	2	uuid:af1403d7-914c-4f46-a28a-bf54dc97d78a/household-information[4]	7	4	3	21	2	2		3		1	1	1	2	1	1	2	1	2	4	1	1	2	4	1	1	3		4	4	3		3	5	Iron sheet	2	6
May 19, 2021 1:18:27 PM	uuid:af1403d7-914c-4f46-a28a-bf54dc97d78a	1	11	2	Mkwazu	May 19, 2021	1338	1	52	1338	2	uuid:af1403d7-914c-4f46-a28a-bf54dc97d78a/household-information[2]	7	2	2	52	2	2		3		1	1	1	2	1	1	2	1	2	4	1	1	2	4	1	1	3		4	4	3		3	5	Iron sheet	2	6
May 18, 2021 4:04:19 PM	uuid:b9a743fd-dd60-4884-9b9b-cfcb77cf7197	14	16	2	Mbuyu	May 18, 2021	1339	1	70	1339	1	uuid:b9a743fd-dd60-4884-9b9b-cfcb77cf7197/household-information[1]	9	1	1	70	1	2		3		1	1	1	2	1	1	2	0	3	6	0	0	3	3	0	1	3		2	6	5	Net	2	2		1	2
May 18, 2021 4:04:19 PM	uuid:b9a743fd-dd60-4884-9b9b-cfcb77cf7197	14	16	2	Mbuyu	May 18, 2021	1339	1	70	1339	1	uuid:b9a743fd-dd60-4884-9b9b-cfcb77cf7197/household-information[7]	9	7	6	18	1	2		3		1	1	1	2	1	1	2	0	3	6	0	0	3	3	0	1	3		2	6	5	Net	2	2		1	2
May 18, 2021 4:04:19 PM	uuid:b9a743fd-dd60-4884-9b9b-cfcb77cf7197	14	16	2	Mbuyu	May 18, 2021	1339	1	70	1339	1	uuid:b9a743fd-dd60-4884-9b9b-cfcb77cf7197/household-information[8]	9	8	6	5	1	0		0		1	1	1	2	1	1	2	0	3	6	0	0	3	3	0	1	3		2	6	5	Net	2	2		1	2
May 18, 2021 4:04:19 PM	uuid:b9a743fd-dd60-4884-9b9b-cfcb77cf7197	14	16	2	Mbuyu	May 18, 2021	1339	1	70	1339	1	uuid:b9a743fd-dd60-4884-9b9b-cfcb77cf7197/household-information[4]	9	4	3	32	2	2		3		1	2	1	2	1	1	2	0	3	6	0	0	3	3	0	1	3		2	6	5	Net	2	2		1	2
May 18, 2021 4:04:19 PM	uuid:b9a743fd-dd60-4884-9b9b-cfcb77cf7197	14	16	2	Mbuyu	May 18, 2021	1339	1	70	1339	1	uuid:b9a743fd-dd60-4884-9b9b-cfcb77cf7197/household-information[2]	9	2	2	62	2	0		3		1	1	1	2	1	1	2	0	3	6	0	0	3	3	0	1	3		2	6	5	Net	2	2		1	2
May 18, 2021 4:04:19 PM	uuid:b9a743fd-dd60-4884-9b9b-cfcb77cf7197	14	16	2	Mbuyu	May 18, 2021	1339	1	70	1339	1	uuid:b9a743fd-dd60-4884-9b9b-cfcb77cf7197/household-information[3]	9	3	4	66	2	0		3		1	1	1	2	1	1	2	0	3	6	0	0	3	3	0	1	3		2	6	5	Net	2	2		1	2
May 18, 2021 4:04:19 PM	uuid:b9a743fd-dd60-4884-9b9b-cfcb77cf7197	14	16	2	Mbuyu	May 18, 2021	1339	1	70	1339	1	uuid:b9a743fd-dd60-4884-9b9b-cfcb77cf7197/household-information[9]	9	9	6	14	1	2		0		1	1	1	2	1	1	2	0	3	6	0	0	3	3	0	1	3		2	6	5	Net	2	2		1	2
May 18, 2021 4:04:19 PM	uuid:b9a743fd-dd60-4884-9b9b-cfcb77cf7197	14	16	2	Mbuyu	May 18, 2021	1339	1	70	1339	1	uuid:b9a743fd-dd60-4884-9b9b-cfcb77cf7197/household-information[6]	9	6	6	9	2	2		0		1	1	1	2	1	1	2	0	3	6	0	0	3	3	0	1	3		2	6	5	Net	2	2		1	2
May 19, 2021 1:21:37 PM	uuid:e34db178-1bae-4def-bc76-eb8f7409326c	2	12	2	Mkwazu	May 19, 2021	1340	1	72	1340	1	uuid:e34db178-1bae-4def-bc76-eb8f7409326c/household-information[2]	5	2	3	25	2	2		3		1	1	2	0	1	1	2	1	2	2	0	1	2	2	0	1	3		4	3	2		1	2		2	2
May 19, 2021 1:21:37 PM	uuid:e34db178-1bae-4def-bc76-eb8f7409326c	2	12	2	Mkwazu	May 19, 2021	1340	1	72	1340	1	uuid:e34db178-1bae-4def-bc76-eb8f7409326c/household-information[3]	5	3	6	4	1	0		0		1	1	2	0	1	1	2	1	2	2	0	1	2	2	0	1	3		4	3	2		1	2		2	2
May 19, 2021 1:21:37 PM	uuid:e34db178-1bae-4def-bc76-eb8f7409326c	2	12	2	Mkwazu	May 19, 2021	1340	1	72	1340	1	uuid:e34db178-1bae-4def-bc76-eb8f7409326c/household-information[5]	5	5	6	8	2	2		0		1	1	2	0	1	1	2	1	2	2	0	1	2	2	0	1	3		4	3	2		1	2		2	2
May 19, 2021 1:21:37 PM	uuid:e34db178-1bae-4def-bc76-eb8f7409326c	2	12	2	Mkwazu	May 19, 2021	1340	1	72	1340	1	uuid:e34db178-1bae-4def-bc76-eb8f7409326c/household-information[4]	5	4	6	11	2	2		0		1	1	2	0	1	1	2	1	2	2	0	1	2	2	0	1	3		4	3	2		1	2		2	2
May 19, 2021 1:21:37 PM	uuid:e34db178-1bae-4def-bc76-eb8f7409326c	2	12	2	Mkwazu	May 19, 2021	1340	1	72	1340	1	uuid:e34db178-1bae-4def-bc76-eb8f7409326c/household-information[1]	5	1	1	72	2	0		3		1	1	2	0	1	1	2	1	2	2	0	1	2	2	0	1	3		4	3	2		1	2		2	2
May 19, 2021 1:12:08 PM	uuid:87d625c0-1780-47f4-a9fc-a408962fe613	9	13	2	Mkwazu	May 19, 2021	1341	1	59	1341	1	uuid:87d625c0-1780-47f4-a9fc-a408962fe613/household-information[1]	1	1	1	59	1	2		3		1	2	1	2	2	1	2	0	0	1	0	0	0	0	0	2	1		4	1	0		1	5	Processed wood	2	2
May 19, 2021 1:17:25 PM	uuid:543f2204-3597-4856-8637-4e258487ef12	11	14	2	Mkwazu	May 19, 2021	1342	1	50	1342	1	uuid:543f2204-3597-4856-8637-4e258487ef12/household-information[6]	6	6	3	4	1	0		0		1	1	1	2	1	1	2	1	3	2	0	1	3	2	0	1	3		4	4	2		2	2		2	6
May 19, 2021 1:17:25 PM	uuid:543f2204-3597-4856-8637-4e258487ef12	11	14	2	Mkwazu	May 19, 2021	1342	1	50	1342	1	uuid:543f2204-3597-4856-8637-4e258487ef12/household-information[3]	6	3	3	13	1	2		0		1	1	1	2	1	1	2	1	3	2	0	1	3	2	0	1	3		4	4	2		2	2		2	6
May 19, 2021 1:17:25 PM	uuid:543f2204-3597-4856-8637-4e258487ef12	11	14	2	Mkwazu	May 19, 2021	1342	1	50	1342	1	uuid:543f2204-3597-4856-8637-4e258487ef12/household-information[5]	6	5	3	8	1	2		0		1	1	1	2	1	1	2	1	3	2	0	1	3	2	0	1	3		4	4	2		2	2		2	6
May 19, 2021 1:17:25 PM	uuid:543f2204-3597-4856-8637-4e258487ef12	11	14	2	Mkwazu	May 19, 2021	1342	1	50	1342	1	uuid:543f2204-3597-4856-8637-4e258487ef12/household-information[1]	6	1	1	50	1	2		3		1	1	1	2	1	1	2	1	3	2	0	1	3	2	0	1	3		4	4	2		2	2		2	6
May 19, 2021 1:17:25 PM	uuid:543f2204-3597-4856-8637-4e258487ef12	11	14	2	Mkwazu	May 19, 2021	1342	1	50	1342	1	uuid:543f2204-3597-4856-8637-4e258487ef12/household-information[2]	6	2	2	35	2	0		3		1	1	1	2	1	1	2	1	3	2	0	1	3	2	0	1	3		4	4	2		2	2		2	6
May 19, 2021 1:17:40 PM	uuid:e96c0c82-6808-492b-a535-4e973bcca9e0	13	15	2	Mkwazu	May 19, 2021	1343	1	31	1343	1	uuid:e96c0c82-6808-492b-a535-4e973bcca9e0/household-information[3]	5	3	3	13	1	2		0		1	1	1	2	1	1	2	1	2	2	0	1	2	2	0	1	1		2	1	5	Net	1	3		2	2
May 19, 2021 1:17:40 PM	uuid:e96c0c82-6808-492b-a535-4e973bcca9e0	13	15	2	Mkwazu	May 19, 2021	1343	1	31	1343	1	uuid:e96c0c82-6808-492b-a535-4e973bcca9e0/household-information[1]	5	1	1	31	1	2		3		1	1	1	2	1	1	2	1	2	2	0	1	2	2	0	1	1		2	1	5	Net	1	3		2	2
May 19, 2021 1:17:40 PM	uuid:e96c0c82-6808-492b-a535-4e973bcca9e0	13	15	2	Mkwazu	May 19, 2021	1343	1	31	1343	1	uuid:e96c0c82-6808-492b-a535-4e973bcca9e0/household-information[2]	5	2	2	28	2	2		3		1	1	1	2	1	1	2	1	2	2	0	1	2	2	0	1	1		2	1	5	Net	1	3		2	2
May 19, 2021 1:17:40 PM	uuid:e96c0c82-6808-492b-a535-4e973bcca9e0	13	15	2	Mkwazu	May 19, 2021	1343	1	31	1343	1	uuid:e96c0c82-6808-492b-a535-4e973bcca9e0/household-information[4]	5	4	3	9	1	2		0		1	1	1	2	1	1	2	1	2	2	0	1	2	2	0	1	1		2	1	5	Net	1	3		2	2
May 19, 2021 1:17:40 PM	uuid:e96c0c82-6808-492b-a535-4e973bcca9e0	13	15	2	Mkwazu	May 19, 2021	1343	1	31	1343	1	uuid:e96c0c82-6808-492b-a535-4e973bcca9e0/household-information[5]	5	5	3	1	1	0		0		1	1	1	2	1	1	2	1	2	2	0	1	2	2	0	1	1		2	1	5	Net	1	3		2	2
May 19, 2021 1:11:37 PM	uuid:628a9e47-9c80-4882-b8cd-e5388a29abe4	14	16	2	Mkwazu	May 19, 2021	1344	1	66	1344	2	uuid:628a9e47-9c80-4882-b8cd-e5388a29abe4/household-information[6]	9	6	6	10	2	2		0		1	1	1	2	1	1	2	2	4	3	0	2	4	3	0	1	3		4	2	2		3	3		2	2
May 19, 2021 1:11:37 PM	uuid:628a9e47-9c80-4882-b8cd-e5388a29abe4	14	16	2	Mkwazu	May 19, 2021	1344	1	66	1344	2	uuid:628a9e47-9c80-4882-b8cd-e5388a29abe4/household-information[9]	9	9	6	1	2	0		0		1	1	1	2	1	1	2	2	4	3	0	2	4	3	0	1	3		4	2	2		3	3		2	2
May 19, 2021 1:11:37 PM	uuid:628a9e47-9c80-4882-b8cd-e5388a29abe4	14	16	2	Mkwazu	May 19, 2021	1344	1	66	1344	2	uuid:628a9e47-9c80-4882-b8cd-e5388a29abe4/household-information[3]	9	3	3	19	2	2		3		1	1	1	2	1	1	2	2	4	3	0	2	4	3	0	1	3		4	2	2		3	3		2	2
May 19, 2021 1:11:37 PM	uuid:628a9e47-9c80-4882-b8cd-e5388a29abe4	14	16	2	Mkwazu	May 19, 2021	1344	1	66	1344	2	uuid:628a9e47-9c80-4882-b8cd-e5388a29abe4/household-information[1]	9	1	1	70	1	2		3		1	1	1	2	1	1	2	2	4	3	0	2	4	3	0	1	3		4	2	2		3	3		2	2
May 19, 2021 1:11:37 PM	uuid:628a9e47-9c80-4882-b8cd-e5388a29abe4	14	16	2	Mkwazu	May 19, 2021	1344	1	66	1344	2	uuid:628a9e47-9c80-4882-b8cd-e5388a29abe4/household-information[7]	9	7	6	10	1	2		0		1	1	1	2	1	1	2	2	4	3	0	2	4	3	0	1	3		4	2	2		3	3		2	2
May 19, 2021 1:11:37 PM	uuid:628a9e47-9c80-4882-b8cd-e5388a29abe4	14	16	2	Mkwazu	May 19, 2021	1344	1	66	1344	2	uuid:628a9e47-9c80-4882-b8cd-e5388a29abe4/household-information[5]	9	5	3	10	2	2		0		1	1	1	2	1	1	2	2	4	3	0	2	4	3	0	1	3		4	2	2		3	3		2	2
May 19, 2021 1:11:37 PM	uuid:628a9e47-9c80-4882-b8cd-e5388a29abe4	14	16	2	Mkwazu	May 19, 2021	1344	1	66	1344	2	uuid:628a9e47-9c80-4882-b8cd-e5388a29abe4/household-information[2]	9	2	2	66	2	2		3		1	1	1	2	1	1	2	2	4	3	0	2	4	3	0	1	3		4	2	2		3	3		2	2
May 19, 2021 1:11:37 PM	uuid:628a9e47-9c80-4882-b8cd-e5388a29abe4	14	16	2	Mkwazu	May 19, 2021	1344	1	66	1344	2	uuid:628a9e47-9c80-4882-b8cd-e5388a29abe4/household-information[8]	9	8	6	4	2	0		0		1	1	1	2	1	1	2	2	4	3	0	2	4	3	0	1	3		4	2	2		3	3		2	2
May 19, 2021 1:07:16 PM	uuid:9e5b00db-f84e-4d46-9d43-f21b78af6373	6	17	2	Mkwazu	May 19, 2021	1345	1	71	1345	1	uuid:9e5b00db-f84e-4d46-9d43-f21b78af6373/household-information[3]	7	3	3	33	2	2		3		1	1	2	1	1	1	2	1	2	4	0	1	2	4	0	1	3		4	4	2		2	2		2	2
May 19, 2021 1:07:16 PM	uuid:9e5b00db-f84e-4d46-9d43-f21b78af6373	6	17	2	Mkwazu	May 19, 2021	1345	1	71	1345	1	uuid:9e5b00db-f84e-4d46-9d43-f21b78af6373/household-information[4]	7	4	6	14	2	2		0		1	1	2	1	1	1	2	1	2	4	0	1	2	4	0	1	3		4	4	2		2	2		2	2
May 19, 2021 1:07:16 PM	uuid:9e5b00db-f84e-4d46-9d43-f21b78af6373	6	17	2	Mkwazu	May 19, 2021	1345	1	71	1345	1	uuid:9e5b00db-f84e-4d46-9d43-f21b78af6373/household-information[5]	7	5	6	29	2	2		0		1	1	2	1	1	1	2	1	2	4	0	1	2	4	0	1	3		4	4	2		2	2		2	2
May 19, 2021 1:07:16 PM	uuid:9e5b00db-f84e-4d46-9d43-f21b78af6373	6	17	2	Mkwazu	May 19, 2021	1345	1	71	1345	1	uuid:9e5b00db-f84e-4d46-9d43-f21b78af6373/household-information[1]	7	1	1	71	2	1		3		1	1	2	1	1	1	2	1	2	4	0	1	2	4	0	1	3		4	4	2		2	2		2	2
May 19, 2021 1:07:16 PM	uuid:9e5b00db-f84e-4d46-9d43-f21b78af6373	6	17	2	Mkwazu	May 19, 2021	1345	1	71	1345	1	uuid:9e5b00db-f84e-4d46-9d43-f21b78af6373/household-information[2]	7	2	3	38	1	2		3		1	1	2	1	1	1	2	1	2	4	0	1	2	4	0	1	3		4	4	2		2	2		2	2
May 19, 2021 1:07:16 PM	uuid:9e5b00db-f84e-4d46-9d43-f21b78af6373	6	17	2	Mkwazu	May 19, 2021	1345	1	71	1345	1	uuid:9e5b00db-f84e-4d46-9d43-f21b78af6373/household-information[6]	7	6	6	3	2	0		0		1	1	2	1	1	1	2	1	2	4	0	1	2	4	0	1	3		4	4	2		2	2		2	2
May 19, 2021 1:07:17 PM	uuid:39738d74-fced-40c7-a576-953e1975835e	16	17	2	Mkwazu	May 19, 2021	1346	1	52	1346	1	uuid:39738d74-fced-40c7-a576-953e1975835e/household-information[2]	2	2	3	16	2	0		0		1	1	1	2	1	1	2	0	1	1	0	0	1	1	0	1	3		4	3	2		1	2		2	6
May 19, 2021 1:18:28 PM	uuid:af5649bb-ad97-4f11-aa90-22ab28a22013	5	11	2	Mkwazu	May 19, 2021	1347	1	64	1347	2	uuid:af5649bb-ad97-4f11-aa90-22ab28a22013/household-information[3]	3	3	6	11	1	2		0		1	1	2	0	1	1	2	0	1	2	0	0	1	2	0	1	3		3	1	2		1	3		2	2
May 19, 2021 1:18:28 PM	uuid:af5649bb-ad97-4f11-aa90-22ab28a22013	5	11	2	Mkwazu	May 19, 2021	1347	1	64	1347	2	uuid:af5649bb-ad97-4f11-aa90-22ab28a22013/household-information[1]	3	1	1	66	1	0		3		1	1	2	0	1	1	2	0	1	2	0	0	1	2	0	1	3		3	1	2		1	3		2	2
May 19, 2021 1:18:28 PM	uuid:af5649bb-ad97-4f11-aa90-22ab28a22013	5	11	2	Mkwazu	May 19, 2021	1347	1	64	1347	2	uuid:af5649bb-ad97-4f11-aa90-22ab28a22013/household-information[2]	3	2	2	64	2	2		3		1	1	2	0	1	1	2	0	1	2	0	0	1	2	0	1	3		3	1	2		1	3		2	2
May 19, 2021 1:21:37 PM	uuid:968e31a7-5acf-4330-9657-1ac8bbcb9ccf	7	12	2	Mkwazu	May 19, 2021	1348	1	25	1348	3	uuid:968e31a7-5acf-4330-9657-1ac8bbcb9ccf/household-information[1]	1	1	1	53	1	2		3		1	1	1	2	1	1	2	0	0	1	0	0	0	1	0	1	3		2	4	2		2	2		2	2
May 19, 2021 1:12:10 PM	uuid:0a9270bd-d123-4686-995f-12e95b5aaa26	10	13	2	Mkwazu	May 19, 2021	1349	1	63	1349	1	uuid:0a9270bd-d123-4686-995f-12e95b5aaa26/household-information[5]	5	5	3	22	1	2		2		2		1	2	1	1	2	0	2	2	0	0	2	2	0	1	3		4	8	5	steel bar	2	5	Processed wood	2	6
May 19, 2021 1:12:10 PM	uuid:0a9270bd-d123-4686-995f-12e95b5aaa26	10	13	2	Mkwazu	May 19, 2021	1349	1	63	1349	1	uuid:0a9270bd-d123-4686-995f-12e95b5aaa26/household-information[4]	5	4	6	9	2	2		4		1	1	1	2	1	1	2	0	2	2	0	0	2	2	0	1	3		4	8	5	steel bar	2	5	Processed wood	2	6
May 19, 2021 1:12:10 PM	uuid:0a9270bd-d123-4686-995f-12e95b5aaa26	10	13	2	Mkwazu	May 19, 2021	1349	1	63	1349	1	uuid:0a9270bd-d123-4686-995f-12e95b5aaa26/household-information[3]	5	3	3	19	1	3		2		1	1	1	2	1	1	2	0	2	2	0	0	2	2	0	1	3		4	8	5	steel bar	2	5	Processed wood	2	6
May 19, 2021 1:12:10 PM	uuid:0a9270bd-d123-4686-995f-12e95b5aaa26	10	13	2	Mkwazu	May 19, 2021	1349	1	63	1349	1	uuid:0a9270bd-d123-4686-995f-12e95b5aaa26/household-information[1]	5	1	1	63	1	2		3		1	1	1	2	1	1	2	0	2	2	0	0	2	2	0	1	3		4	8	5	steel bar	2	5	Processed wood	2	6
May 19, 2021 1:12:10 PM	uuid:0a9270bd-d123-4686-995f-12e95b5aaa26	10	13	2	Mkwazu	May 19, 2021	1349	1	63	1349	1	uuid:0a9270bd-d123-4686-995f-12e95b5aaa26/household-information[2]	5	2	2	59	2	2		3		1	1	1	2	1	1	2	0	2	2	0	0	2	2	0	1	3		4	8	5	steel bar	2	5	Processed wood	2	6
May 19, 2021 1:17:26 PM	uuid:c6239142-5723-4e94-8678-2b6279671fc3	4	14	2	Mkwazu	May 19, 2021	1350	1	44	1350	2	uuid:c6239142-5723-4e94-8678-2b6279671fc3/household-information[6]	6	6	3	8	2	2		0		1	1	1	2	1	1	2	0	4	2	0	0	4	2	0	1	3		4	3	2		3	1		2	2
May 19, 2021 1:17:26 PM	uuid:c6239142-5723-4e94-8678-2b6279671fc3	4	14	2	Mkwazu	May 19, 2021	1350	1	44	1350	2	uuid:c6239142-5723-4e94-8678-2b6279671fc3/household-information[4]	6	4	3	16	2	3		0		1	1	1	2	1	1	2	0	4	2	0	0	4	2	0	1	3		4	3	2		3	1		2	2
May 19, 2021 1:17:26 PM	uuid:c6239142-5723-4e94-8678-2b6279671fc3	4	14	2	Mkwazu	May 19, 2021	1350	1	44	1350	2	uuid:c6239142-5723-4e94-8678-2b6279671fc3/household-information[3]	6	3	3	17	1	3		3		1	1	1	2	1	1	2	0	4	2	0	0	4	2	0	1	3		4	3	2		3	1		2	2
May 19, 2021 1:17:26 PM	uuid:c6239142-5723-4e94-8678-2b6279671fc3	4	14	2	Mkwazu	May 19, 2021	1350	1	44	1350	2	uuid:c6239142-5723-4e94-8678-2b6279671fc3/household-information[1]	6	1	2	44	2	2		3		1	1	1	2	1	1	2	0	4	2	0	0	4	2	0	1	3		4	3	2		3	1		2	2
May 19, 2021 1:17:26 PM	uuid:c6239142-5723-4e94-8678-2b6279671fc3	4	14	2	Mkwazu	May 19, 2021	1350	1	44	1350	2	uuid:c6239142-5723-4e94-8678-2b6279671fc3/household-information[2]	6	2	1	52	1	2		3		1	1	1	2	1	1	2	0	4	2	0	0	4	2	0	1	3		4	3	2		3	1		2	2
May 19, 2021 1:18:29 PM	uuid:11a77e58-02ba-4d18-ada1-59f8919fce0a	5	11	2	Mkwazu	May 19, 2021	1351	1	36	1351	2	uuid:11a77e58-02ba-4d18-ada1-59f8919fce0a/household-information[7]	8	7	3	1	1	0		0		1	1	1	2	1	1	2	1	4	3	0	1	4	3	0	1	3		4	2	0		2	3		2	2
May 19, 2021 1:18:29 PM	uuid:11a77e58-02ba-4d18-ada1-59f8919fce0a	5	11	2	Mkwazu	May 19, 2021	1351	1	36	1351	2	uuid:11a77e58-02ba-4d18-ada1-59f8919fce0a/household-information[6]	8	6	3	10	1	2		0		1	1	1	2	1	1	2	1	4	3	0	1	4	3	0	1	3		4	2	0		2	3		2	2
May 19, 2021 1:18:29 PM	uuid:11a77e58-02ba-4d18-ada1-59f8919fce0a	5	11	2	Mkwazu	May 19, 2021	1351	1	36	1351	2	uuid:11a77e58-02ba-4d18-ada1-59f8919fce0a/household-information[3]	8	3	3	17	2	3		0		1	1	1	2	1	1	2	1	4	3	0	1	4	3	0	1	3		4	2	0		2	3		2	2
May 19, 2021 1:18:29 PM	uuid:11a77e58-02ba-4d18-ada1-59f8919fce0a	5	11	2	Mkwazu	May 19, 2021	1351	1	36	1351	2	uuid:11a77e58-02ba-4d18-ada1-59f8919fce0a/household-information[2]	8	2	2	36	2	0		3		1	1	1	2	1	1	2	1	4	3	0	1	4	3	0	1	3		4	2	0		2	3		2	2
May 19, 2021 1:18:29 PM	uuid:11a77e58-02ba-4d18-ada1-59f8919fce0a	5	11	2	Mkwazu	May 19, 2021	1351	1	36	1351	2	uuid:11a77e58-02ba-4d18-ada1-59f8919fce0a/household-information[1]	8	1	1	52	1	0		6	Traditional doctor	1	1	1	2	1	1	2	1	4	3	0	1	4	3	0	1	3		4	2	0		2	3		2	2
May 19, 2021 1:18:29 PM	uuid:11a77e58-02ba-4d18-ada1-59f8919fce0a	5	11	2	Mkwazu	May 19, 2021	1351	1	36	1351	2	uuid:11a77e58-02ba-4d18-ada1-59f8919fce0a/household-information[5]	8	5	3	10	2	2		0		1	1	1	2	1	1	2	1	4	3	0	1	4	3	0	1	3		4	2	0		2	3		2	2
May 19, 2021 1:18:29 PM	uuid:11a77e58-02ba-4d18-ada1-59f8919fce0a	5	11	2	Mkwazu	May 19, 2021	1351	1	36	1351	2	uuid:11a77e58-02ba-4d18-ada1-59f8919fce0a/household-information[4]	8	4	3	15	1	2		0		1	1	1	2	1	1	2	1	4	3	0	1	4	3	0	1	3		4	2	0		2	3		2	2
May 19, 2021 1:18:29 PM	uuid:11a77e58-02ba-4d18-ada1-59f8919fce0a	5	11	2	Mkwazu	May 19, 2021	1351	1	36	1351	2	uuid:11a77e58-02ba-4d18-ada1-59f8919fce0a/household-information[8]	8	8	7	54	1	2		3		1	1	1	2	1	1	2	1	4	3	0	1	4	3	0	1	3		4	2	0		2	3		2	2
May 19, 2021 1:17:43 PM	uuid:e0e7f845-5930-4548-9a3f-bc66b3a4d042	13	15	2	Mkwazu	May 19, 2021	1352	1	42	1352	1	uuid:e0e7f845-5930-4548-9a3f-bc66b3a4d042/household-information[3]	3	3	3	5	2	0		0		1	1	1	2	1	1	2	0	1	2	0	0	1	2	0	1	3		6	5	5	Net	4	3		2	2
May 19, 2021 1:17:43 PM	uuid:e0e7f845-5930-4548-9a3f-bc66b3a4d042	13	15	2	Mkwazu	May 19, 2021	1352	1	42	1352	1	uuid:e0e7f845-5930-4548-9a3f-bc66b3a4d042/household-information[2]	3	2	2	35	2	2		0		1	1	1	2	1	1	2	0	1	2	0	0	1	2	0	1	3		6	5	5	Net	4	3		2	2
May 19, 2021 1:17:43 PM	uuid:e0e7f845-5930-4548-9a3f-bc66b3a4d042	13	15	2	Mkwazu	May 19, 2021	1352	1	42	1352	1	uuid:e0e7f845-5930-4548-9a3f-bc66b3a4d042/household-information[1]	3	1	1	42	1	2		3		1	1	1	2	1	1	2	0	1	2	0	0	1	2	0	1	3		6	5	5	Net	4	3		2	2
May 19, 2021 1:11:38 PM	uuid:086208ec-e23e-4591-a327-96da79de4a39	3	16	2	Mkwazu	May 19, 2021	1353	1	40	1353	1	uuid:086208ec-e23e-4591-a327-96da79de4a39/household-information[6]	6	6	3	4	1	0		0		1	1	1	2	1	1	2	1	3	2	0	1	3	2	0	1	3		4	4	2		1	2		2	2
May 19, 2021 1:11:38 PM	uuid:086208ec-e23e-4591-a327-96da79de4a39	3	16	2	Mkwazu	May 19, 2021	1353	1	40	1353	1	uuid:086208ec-e23e-4591-a327-96da79de4a39/household-information[4]	6	4	3	14	2	2		0		1	1	1	2	1	1	2	1	3	2	0	1	3	2	0	1	3		4	4	2		1	2		2	2
May 19, 2021 1:11:38 PM	uuid:086208ec-e23e-4591-a327-96da79de4a39	3	16	2	Mkwazu	May 19, 2021	1353	1	40	1353	1	uuid:086208ec-e23e-4591-a327-96da79de4a39/household-information[3]	6	3	3	16	2	3		0		1	1	1	2	1	1	2	1	3	2	0	1	3	2	0	1	3		4	4	2		1	2		2	2
May 19, 2021 1:11:38 PM	uuid:086208ec-e23e-4591-a327-96da79de4a39	3	16	2	Mkwazu	May 19, 2021	1353	1	40	1353	1	uuid:086208ec-e23e-4591-a327-96da79de4a39/household-information[5]	6	5	3	8	2	2		0		1	1	1	2	1	1	2	1	3	2	0	1	3	2	0	1	3		4	4	2		1	2		2	2
May 19, 2021 1:11:38 PM	uuid:086208ec-e23e-4591-a327-96da79de4a39	3	16	2	Mkwazu	May 19, 2021	1353	1	40	1353	1	uuid:086208ec-e23e-4591-a327-96da79de4a39/household-information[2]	6	2	2	37	2	2		3		1	1	1	2	1	1	2	1	3	2	0	1	3	2	0	1	3		4	4	2		1	2		2	2
May 19, 2021 1:21:38 PM	uuid:a19fc0ee-f142-46f3-bd25-867c74e10848	2	12	2	Mkwazu	May 19, 2021	1354	1	27	1354	1	uuid:a19fc0ee-f142-46f3-bd25-867c74e10848/household-information[2]	3	2	2	20	2	2		3		1	1	1	2	1	1	2	1	0	2	0	1	0	2	0	1	3		3	3	2		1	2		2	2
May 19, 2021 1:21:38 PM	uuid:a19fc0ee-f142-46f3-bd25-867c74e10848	2	12	2	Mkwazu	May 19, 2021	1354	1	27	1354	1	uuid:a19fc0ee-f142-46f3-bd25-867c74e10848/household-information[1]	3	1	1	27	1	2		3		1	1	1	2	1	1	2	1	0	2	0	1	0	2	0	1	3		3	3	2		1	2		2	2
May 19, 2021 1:12:12 PM	uuid:cf70b387-cf0c-40c4-b408-487e1640dc81	9	13	2	Mkwazu	May 19, 2021	1355	1	35	1355	1	uuid:cf70b387-cf0c-40c4-b408-487e1640dc81/household-information[3]	4	3	3	6	2	2		6	student	1	1	2	2	1	1	2	0	2	2	0	0	2	0	0	1	3		4	2	0		2	3		2	5
May 19, 2021 1:12:12 PM	uuid:cf70b387-cf0c-40c4-b408-487e1640dc81	9	13	2	Mkwazu	May 19, 2021	1355	1	35	1355	1	uuid:cf70b387-cf0c-40c4-b408-487e1640dc81/household-information[1]	4	1	1	35	1	2		3		1	2	2	2	1	1	2	0	2	2	0	0	2	0	0	1	3		4	2	0		2	3		2	5
May 19, 2021 1:12:12 PM	uuid:cf70b387-cf0c-40c4-b408-487e1640dc81	9	13	2	Mkwazu	May 19, 2021	1355	1	35	1355	1	uuid:cf70b387-cf0c-40c4-b408-487e1640dc81/household-information[2]	4	2	2	30	2	2		3		1	2	2	2	1	1	2	0	2	2	0	0	2	0	0	1	3		4	2	0		2	3		2	5
May 19, 2021 1:17:27 PM	uuid:e9dcc9a2-614d-4d7f-b9ae-48de2d09a5cf	4	14	2	Mkwazu	May 19, 2021	1356	1	30	1356	2	uuid:e9dcc9a2-614d-4d7f-b9ae-48de2d09a5cf/household-information[1]	5	1	1	50	1	2		3		1	1	1	2	1	1	2	1	2	2	0	1	2	2	0	1	3		2	4	2		2	2		2	2
May 19, 2021 1:17:27 PM	uuid:e9dcc9a2-614d-4d7f-b9ae-48de2d09a5cf	4	14	2	Mkwazu	May 19, 2021	1356	1	30	1356	2	uuid:e9dcc9a2-614d-4d7f-b9ae-48de2d09a5cf/household-information[2]	5	2	2	30	2	2		3		1	1	1	2	1	1	2	1	2	2	0	1	2	2	0	1	3		2	4	2		2	2		2	2
May 19, 2021 1:17:27 PM	uuid:e9dcc9a2-614d-4d7f-b9ae-48de2d09a5cf	4	14	2	Mkwazu	May 19, 2021	1356	1	30	1356	2	uuid:e9dcc9a2-614d-4d7f-b9ae-48de2d09a5cf/household-information[4]	5	4	3	8	2	2		0		1	1	1	2	1	1	2	1	2	2	0	1	2	2	0	1	3		2	4	2		2	2		2	2
May 19, 2021 1:17:27 PM	uuid:e9dcc9a2-614d-4d7f-b9ae-48de2d09a5cf	4	14	2	Mkwazu	May 19, 2021	1356	1	30	1356	2	uuid:e9dcc9a2-614d-4d7f-b9ae-48de2d09a5cf/household-information[3]	5	3	3	11	1	2		0		1	1	1	2	1	1	2	1	2	2	0	1	2	2	0	1	3		2	4	2		2	2		2	2
May 19, 2021 1:17:27 PM	uuid:e9dcc9a2-614d-4d7f-b9ae-48de2d09a5cf	4	14	2	Mkwazu	May 19, 2021	1356	1	30	1356	2	uuid:e9dcc9a2-614d-4d7f-b9ae-48de2d09a5cf/household-information[5]	5	5	3	4	1	0		0		1	1	1	2	1	1	2	1	2	2	0	1	2	2	0	1	3		2	4	2		2	2		2	2
May 19, 2021 1:17:45 PM	uuid:6e18fac2-849e-40be-a35c-490848bb9d99	13	15	2	Mkwazu	May 19, 2021	1357	1	24	1357	2	uuid:6e18fac2-849e-40be-a35c-490848bb9d99/household-information[4]	4	4	6	3	2	0		0		1	1	2	0	1	1	2	1	0	3	0	1	0	3	0	1	3		6	4	5	steel bar	3	2		2	2
May 19, 2021 1:17:45 PM	uuid:6e18fac2-849e-40be-a35c-490848bb9d99	13	15	2	Mkwazu	May 19, 2021	1357	1	24	1357	2	uuid:6e18fac2-849e-40be-a35c-490848bb9d99/household-information[1]	4	1	1	75	2	0		3		1	1	2	0	1	1	2	1	0	3	0	1	0	3	0	1	3		6	4	5	steel bar	3	2		2	2
May 19, 2021 1:17:45 PM	uuid:6e18fac2-849e-40be-a35c-490848bb9d99	13	15	2	Mkwazu	May 19, 2021	1357	1	24	1357	2	uuid:6e18fac2-849e-40be-a35c-490848bb9d99/household-information[2]	4	2	6	24	2	2		3		1	1	2	0	1	1	2	1	0	3	0	1	0	3	0	1	3		6	4	5	steel bar	3	2		2	2
May 19, 2021 1:11:40 PM	uuid:f01a4e05-1fda-4634-befe-9151f02c1971	3	16	2	Mkwazu	May 19, 2021	1358	1	27	1358	3	uuid:f01a4e05-1fda-4634-befe-9151f02c1971/household-information[2]	6	2	6	25	2	3		3		1	2	1	0	1	1	2	1	1	4	0	1	0	1	0	1	3		4	3	0		1	2		2	2
May 19, 2021 1:11:40 PM	uuid:f01a4e05-1fda-4634-befe-9151f02c1971	3	16	2	Mkwazu	May 19, 2021	1358	1	27	1358	3	uuid:f01a4e05-1fda-4634-befe-9151f02c1971/household-information[4]	6	4	6	42	2	2		3		1	2	1	0	1	1	2	1	1	4	0	1	0	1	0	1	3		4	3	0		1	2		2	2
May 19, 2021 1:11:40 PM	uuid:f01a4e05-1fda-4634-befe-9151f02c1971	3	16	2	Mkwazu	May 19, 2021	1358	1	27	1358	3	uuid:f01a4e05-1fda-4634-befe-9151f02c1971/household-information[1]	6	1	1	62	2	0		0		1	2	1	0	1	1	2	1	1	4	0	1	0	1	0	1	3		4	3	0		1	2		2	2
May 19, 2021 1:11:40 PM	uuid:f01a4e05-1fda-4634-befe-9151f02c1971	3	16	2	Mkwazu	May 19, 2021	1358	1	27	1358	3	uuid:f01a4e05-1fda-4634-befe-9151f02c1971/household-information[3]	6	3	9	1	1	0		0		1	1	1	0	1	1	2	1	1	4	0	1	0	1	0	1	3		4	3	0		1	2		2	2
May 19, 2021 1:11:40 PM	uuid:f01a4e05-1fda-4634-befe-9151f02c1971	3	16	2	Mkwazu	May 19, 2021	1358	1	27	1358	3	uuid:f01a4e05-1fda-4634-befe-9151f02c1971/household-information[5]	6	5	5	46	1	2		3		2		1	0	1	1	2	1	1	4	0	1	0	1	0	1	3		4	3	0		1	2		2	2
May 19, 2021 1:07:18 PM	uuid:3493c8db-d87d-48e3-8de3-f27a69dd7baf	6	17	2	Mkwazu	May 19, 2021	1359	1	50	1359	1	uuid:3493c8db-d87d-48e3-8de3-f27a69dd7baf/household-information[5]	5	5	9	22	1	2		3		1	2	1	3	1	1	2	0	0	5	0	0	0	5	0	1	3		4	3	0		2	2		2	2
May 19, 2021 1:07:18 PM	uuid:3493c8db-d87d-48e3-8de3-f27a69dd7baf	6	17	2	Mkwazu	May 19, 2021	1359	1	50	1359	1	uuid:3493c8db-d87d-48e3-8de3-f27a69dd7baf/household-information[3]	5	3	9	50	1	1		3		1	2	1	3	1	1	2	0	0	5	0	0	0	5	0	1	3		4	3	0		2	2		2	2
May 19, 2021 1:07:18 PM	uuid:3493c8db-d87d-48e3-8de3-f27a69dd7baf	6	17	2	Mkwazu	May 19, 2021	1359	1	50	1359	1	uuid:3493c8db-d87d-48e3-8de3-f27a69dd7baf/household-information[2]	5	2	2	45	2	4		2		1	2	1	3	1	1	2	0	0	5	0	0	0	5	0	1	3		4	3	0		2	2		2	2
May 19, 2021 1:07:18 PM	uuid:3493c8db-d87d-48e3-8de3-f27a69dd7baf	6	17	2	Mkwazu	May 19, 2021	1359	1	50	1359	1	uuid:3493c8db-d87d-48e3-8de3-f27a69dd7baf/household-information[1]	5	1	1	48	1	3		2		1	2	1	3	1	1	2	0	0	5	0	0	0	5	0	1	3		4	3	0		2	2		2	2
May 19, 2021 1:07:18 PM	uuid:3493c8db-d87d-48e3-8de3-f27a69dd7baf	6	17	2	Mkwazu	May 19, 2021	1359	1	50	1359	1	uuid:3493c8db-d87d-48e3-8de3-f27a69dd7baf/household-information[4]	5	4	9	19	1	3		3		1	2	1	3	1	1	2	0	0	5	0	0	0	5	0	1	3		4	3	0		2	2		2	2
May 25, 2021 8:44:09 AM	uuid:83339d9a-797e-4334-b3c9-253d1b406e9f	1	11	2	Mitindi	May 20, 2021	1360	1	84	1360	1	uuid:83339d9a-797e-4334-b3c9-253d1b406e9f/household-information[8]	8	8	6	17	1	0		0		1	1	1	2	1	1	2	1	2	5	0	1	2	5	0	1	3		4	4	2		2	2		2	2
May 25, 2021 8:44:09 AM	uuid:83339d9a-797e-4334-b3c9-253d1b406e9f	1	11	2	Mitindi	May 20, 2021	1360	1	84	1360	1	uuid:83339d9a-797e-4334-b3c9-253d1b406e9f/household-information[6]	8	6	6	6	1	1		0		1	1	1	2	1	1	2	1	2	5	0	1	2	5	0	1	3		4	4	2		2	2		2	2
May 25, 2021 8:44:09 AM	uuid:83339d9a-797e-4334-b3c9-253d1b406e9f	1	11	2	Mitindi	May 20, 2021	1360	1	84	1360	1	uuid:83339d9a-797e-4334-b3c9-253d1b406e9f/household-information[1]	8	1	1	84	1	2		3		1	1	1	2	1	1	2	1	2	5	0	1	2	5	0	1	3		4	4	2		2	2		2	2
May 25, 2021 8:44:09 AM	uuid:83339d9a-797e-4334-b3c9-253d1b406e9f	1	11	2	Mitindi	May 20, 2021	1360	1	84	1360	1	uuid:83339d9a-797e-4334-b3c9-253d1b406e9f/household-information[2]	8	2	2	61	2	0		0		1	1	1	2	1	1	2	1	2	5	0	1	2	5	0	1	3		4	4	2		2	2		2	2
May 25, 2021 8:44:09 AM	uuid:83339d9a-797e-4334-b3c9-253d1b406e9f	1	11	2	Mitindi	May 20, 2021	1360	1	84	1360	1	uuid:83339d9a-797e-4334-b3c9-253d1b406e9f/household-information[3]	8	3	3	20	2	2		3		1	1	1	2	1	1	2	1	2	5	0	1	2	5	0	1	3		4	4	2		2	2		2	2
May 25, 2021 8:44:09 AM	uuid:83339d9a-797e-4334-b3c9-253d1b406e9f	1	11	2	Mitindi	May 20, 2021	1360	1	84	1360	1	uuid:83339d9a-797e-4334-b3c9-253d1b406e9f/household-information[5]	8	5	6	9	1	0		0		1	1	1	2	1	1	2	1	2	5	0	1	2	5	0	1	3		4	4	2		2	2		2	2
May 25, 2021 8:44:09 AM	uuid:83339d9a-797e-4334-b3c9-253d1b406e9f	1	11	2	Mitindi	May 20, 2021	1360	1	84	1360	1	uuid:83339d9a-797e-4334-b3c9-253d1b406e9f/household-information[7]	8	7	6	2	1	0		0		1	1	1	2	1	1	2	1	2	5	0	1	2	5	0	1	3		4	4	2		2	2		2	2
May 19, 2021 1:21:39 PM	uuid:ff61de41-9392-4ef7-be9d-5994f9731128	7	12	2	Mkwazu	May 19, 2021	1361	1	40	1361	2	uuid:ff61de41-9392-4ef7-be9d-5994f9731128/household-information[2]	3	2	2	40	2	2		3		1	1	1	2	1	1	2	0	0	3	0	0	0	3	0	1	3		4	9	2		1	2		2	2
May 19, 2021 1:21:39 PM	uuid:ff61de41-9392-4ef7-be9d-5994f9731128	7	12	2	Mkwazu	May 19, 2021	1361	1	40	1361	2	uuid:ff61de41-9392-4ef7-be9d-5994f9731128/household-information[1]	3	1	1	44	1	2		3		1	1	1	2	1	1	2	0	0	3	0	0	0	3	0	1	3		4	9	2		1	2		2	2
May 19, 2021 1:12:13 PM	uuid:146a083a-9068-454b-9b56-ce9c95ccbb13	10	13	2	Mkwazu	May 19, 2021	1362	1	83	1362	1	uuid:146a083a-9068-454b-9b56-ce9c95ccbb13/household-information[1]	2	1	1	83	1	2		3		1	1	1	2	1	1	2	0	0	2	0	0	0	2	0	1	3		4	8	5	steel bar	2	5	Processed wood	2	6
May 19, 2021 1:12:13 PM	uuid:146a083a-9068-454b-9b56-ce9c95ccbb13	10	13	2	Mkwazu	May 19, 2021	1362	1	83	1362	1	uuid:146a083a-9068-454b-9b56-ce9c95ccbb13/household-information[2]	2	2	2	80	2	0		3		1	1	1	2	1	1	2	0	0	2	0	0	0	2	0	1	3		4	8	5	steel bar	2	5	Processed wood	2	6
May 19, 2021 1:17:47 PM	uuid:2f7962d8-c1c5-4bb2-bb6a-70add66be11f	13	15	2	Mkwazu	May 19, 2021	1364	1	26	1364	2	uuid:2f7962d8-c1c5-4bb2-bb6a-70add66be11f/household-information[3]	4	3	3	6	1	1		0		1	1	1	3	1	1	2	1	1	2	0	1	1	2	0	1	3		4	3	5	Net & curtain	2	2		1	2
May 19, 2021 1:17:47 PM	uuid:2f7962d8-c1c5-4bb2-bb6a-70add66be11f	13	15	2	Mkwazu	May 19, 2021	1364	1	26	1364	2	uuid:2f7962d8-c1c5-4bb2-bb6a-70add66be11f/household-information[1]	4	1	1	30	1	3		3		1	1	1	3	1	1	2	1	1	2	0	1	1	2	0	1	3		4	3	5	Net & curtain	2	2		1	2
May 19, 2021 1:17:47 PM	uuid:2f7962d8-c1c5-4bb2-bb6a-70add66be11f	13	15	2	Mkwazu	May 19, 2021	1364	1	26	1364	2	uuid:2f7962d8-c1c5-4bb2-bb6a-70add66be11f/household-information[4]	4	4	3	1	1	0		0		1	1	1	3	1	1	2	1	1	2	0	1	1	2	0	1	3		4	3	5	Net & curtain	2	2		1	2
May 19, 2021 1:17:47 PM	uuid:2f7962d8-c1c5-4bb2-bb6a-70add66be11f	13	15	2	Mkwazu	May 19, 2021	1364	1	26	1364	2	uuid:2f7962d8-c1c5-4bb2-bb6a-70add66be11f/household-information[2]	4	2	2	26	2	2		3		1	1	1	3	1	1	2	1	1	2	0	1	1	2	0	1	3		4	3	5	Net & curtain	2	2		1	2
May 25, 2021 8:31:06 AM	uuid:521482bd-93b4-4eaa-88f4-92012c63354a	4	14	2	Mitindi	May 20, 2021	1365	1	47	1365	1	uuid:521482bd-93b4-4eaa-88f4-92012c63354a/household-information[2]	6	2	2	40	2	2		3		1	1	1	2	1	1	2	1	2	3	0	1	2	3	0	1	3		4	2	2		1	2		2	2
May 25, 2021 8:31:06 AM	uuid:521482bd-93b4-4eaa-88f4-92012c63354a	4	14	2	Mitindi	May 20, 2021	1365	1	47	1365	1	uuid:521482bd-93b4-4eaa-88f4-92012c63354a/household-information[5]	6	5	3	6	2	0		0		1	1	1	2	1	1	2	1	2	3	0	1	2	3	0	1	3		4	2	2		1	2		2	2
May 25, 2021 8:31:06 AM	uuid:521482bd-93b4-4eaa-88f4-92012c63354a	4	14	2	Mitindi	May 20, 2021	1365	1	47	1365	1	uuid:521482bd-93b4-4eaa-88f4-92012c63354a/household-information[6]	6	6	3	4	2	0		0		1	1	1	2	1	1	2	1	2	3	0	1	2	3	0	1	3		4	2	2		1	2		2	2
May 25, 2021 8:31:06 AM	uuid:521482bd-93b4-4eaa-88f4-92012c63354a	4	14	2	Mitindi	May 20, 2021	1365	1	47	1365	1	uuid:521482bd-93b4-4eaa-88f4-92012c63354a/household-information[3]	6	3	3	18	1	2		3		1	1	1	2	1	1	2	1	2	3	0	1	2	3	0	1	3		4	2	2		1	2		2	2
May 25, 2021 8:31:06 AM	uuid:521482bd-93b4-4eaa-88f4-92012c63354a	4	14	2	Mitindi	May 20, 2021	1365	1	47	1365	1	uuid:521482bd-93b4-4eaa-88f4-92012c63354a/household-information[1]	6	1	1	47	1	2		3		1	1	1	2	1	1	2	1	2	3	0	1	2	3	0	1	3		4	2	2		1	2		2	2
May 25, 2021 8:31:06 AM	uuid:521482bd-93b4-4eaa-88f4-92012c63354a	4	14	2	Mitindi	May 20, 2021	1365	1	47	1365	1	uuid:521482bd-93b4-4eaa-88f4-92012c63354a/household-information[4]	6	4	3	12	1	2		0		1	1	1	2	1	1	2	1	2	3	0	1	2	3	0	1	3		4	2	2		1	2		2	2
May 19, 2021 1:07:19 PM	uuid:b8b75952-1b70-4859-a4d9-bcb4b86db4bf	16	17	2	Mkwazu	May 19, 2021	1366	1	67	1366	1	uuid:b8b75952-1b70-4859-a4d9-bcb4b86db4bf/household-information[2]	3	2	2	59	2	2		3		1	1	1	2	1	1	2	0	0	3	0	0	0	3	0	1	3		4	3	2		1	2		2	2
May 19, 2021 1:07:19 PM	uuid:b8b75952-1b70-4859-a4d9-bcb4b86db4bf	16	17	2	Mkwazu	May 19, 2021	1366	1	67	1366	1	uuid:b8b75952-1b70-4859-a4d9-bcb4b86db4bf/household-information[3]	3	3	3	24	2	3		3		1	1	1	2	1	1	2	0	0	3	0	0	0	3	0	1	3		4	3	2		1	2		2	2
May 19, 2021 1:07:19 PM	uuid:b8b75952-1b70-4859-a4d9-bcb4b86db4bf	16	17	2	Mkwazu	May 19, 2021	1366	1	67	1366	1	uuid:b8b75952-1b70-4859-a4d9-bcb4b86db4bf/household-information[1]	3	1	1	67	1	2		3		1	1	1	2	1	1	2	0	0	3	0	0	0	3	0	1	3		4	3	2		1	2		2	2
May 25, 2021 8:50:07 AM	uuid:c5566dda-c035-4423-9206-494d509af51a	16	17	2	Mitindi	May 20, 2021	1367	1	56	1367	1	uuid:c5566dda-c035-4423-9206-494d509af51a/household-information[1]	5	1	1	56	2	0		4		1	1	2	1	1	1	2	0	4	1	0	0	0	1	0	1	3		4	3	2		2	2		1	2
May 25, 2021 8:50:07 AM	uuid:c5566dda-c035-4423-9206-494d509af51a	16	17	2	Mitindi	May 20, 2021	1367	1	56	1367	1	uuid:c5566dda-c035-4423-9206-494d509af51a/household-information[3]	5	3	3	16	2	0		4		1	2	2	1	1	1	2	0	4	1	0	0	0	1	0	1	3		4	3	2		2	2		1	2
May 25, 2021 8:50:07 AM	uuid:c5566dda-c035-4423-9206-494d509af51a	16	17	2	Mitindi	May 20, 2021	1367	1	56	1367	1	uuid:c5566dda-c035-4423-9206-494d509af51a/household-information[4]	5	4	3	15	1	0		4		1	2	2	1	1	1	2	0	4	1	0	0	0	1	0	1	3		4	3	2		2	2		1	2
May 25, 2021 8:50:07 AM	uuid:c5566dda-c035-4423-9206-494d509af51a	16	17	2	Mitindi	May 20, 2021	1367	1	56	1367	1	uuid:c5566dda-c035-4423-9206-494d509af51a/household-information[5]	5	5	3	14	1	2		4		1	2	2	1	1	1	2	0	4	1	0	0	0	1	0	1	3		4	3	2		2	2		1	2
May 19, 2021 1:21:40 PM	uuid:c4693f25-1f3f-4019-93d5-6157707fb983	2	12	2	Mkwazu	May 19, 2021	1368	1	50	1368	1	uuid:c4693f25-1f3f-4019-93d5-6157707fb983/household-information[4]	4	4	3	19	2	3		3		1	1	1	2	1	1	2	0	0	4	0	0	0	4	0	1	3		6	11	5	Iron	1	5	Iron steel	2	6
May 19, 2021 1:21:40 PM	uuid:c4693f25-1f3f-4019-93d5-6157707fb983	2	12	2	Mkwazu	May 19, 2021	1368	1	50	1368	1	uuid:c4693f25-1f3f-4019-93d5-6157707fb983/household-information[2]	4	2	2	35	2	2		3		1	1	1	2	1	1	2	0	0	4	0	0	0	4	0	1	3		6	11	5	Iron	1	5	Iron steel	2	6
May 19, 2021 1:21:40 PM	uuid:c4693f25-1f3f-4019-93d5-6157707fb983	2	12	2	Mkwazu	May 19, 2021	1368	1	50	1368	1	uuid:c4693f25-1f3f-4019-93d5-6157707fb983/household-information[3]	4	3	3	25	2	3		3		1	1	1	2	1	1	2	0	0	4	0	0	0	4	0	1	3		6	11	5	Iron	1	5	Iron steel	2	6
May 19, 2021 1:12:15 PM	uuid:fe5dc653-ff0a-41ca-8be2-68638cc25ce6	9	13	2	Mkwazu	May 19, 2021	1369	1	42	1369	1	uuid:fe5dc653-ff0a-41ca-8be2-68638cc25ce6/household-information[1]	6	1	1	42	1	0		3		1	2	2	2	1	1	1	1	2	3	0	1	0	1	0	1	3		2	2	5	Net	2	5	Processed wood	2	6
May 19, 2021 1:12:15 PM	uuid:fe5dc653-ff0a-41ca-8be2-68638cc25ce6	9	13	2	Mkwazu	May 19, 2021	1369	1	42	1369	1	uuid:fe5dc653-ff0a-41ca-8be2-68638cc25ce6/household-information[6]	6	6	3	1	2	0		0		1	1	2	2	1	1	1	1	2	3	0	1	0	1	0	1	3		2	2	5	Net	2	5	Processed wood	2	6
May 19, 2021 1:12:15 PM	uuid:fe5dc653-ff0a-41ca-8be2-68638cc25ce6	9	13	2	Mkwazu	May 19, 2021	1369	1	42	1369	1	uuid:fe5dc653-ff0a-41ca-8be2-68638cc25ce6/household-information[4]	6	4	3	16	2	2		6	student	1	2	2	2	1	1	1	1	2	3	0	1	0	1	0	1	3		2	2	5	Net	2	5	Processed wood	2	6
May 19, 2021 1:12:15 PM	uuid:fe5dc653-ff0a-41ca-8be2-68638cc25ce6	9	13	2	Mkwazu	May 19, 2021	1369	1	42	1369	1	uuid:fe5dc653-ff0a-41ca-8be2-68638cc25ce6/household-information[2]	6	2	2	31	2	2		3		1	1	2	2	1	1	1	1	2	3	0	1	0	1	0	1	3		2	2	5	Net	2	5	Processed wood	2	6
May 19, 2021 1:12:15 PM	uuid:fe5dc653-ff0a-41ca-8be2-68638cc25ce6	9	13	2	Mkwazu	May 19, 2021	1369	1	42	1369	1	uuid:fe5dc653-ff0a-41ca-8be2-68638cc25ce6/household-information[5]	6	5	3	11	1	2		6	student	1	2	2	2	1	1	1	1	2	3	0	1	0	1	0	1	3		2	2	5	Net	2	5	Processed wood	2	6
May 25, 2021 8:44:10 AM	uuid:6685780c-2171-470e-91ca-9ebd37dbd862	1	11	2	Mitindi	May 20, 2021	1370	1	43	1370	1	uuid:6685780c-2171-470e-91ca-9ebd37dbd862/household-information[3]	8	3	3	20	2	3		3		1	1	1	2	1	1	2	3	3	2	0	3	3	2	0	1	1		2	1	2		2	2		2	2
May 25, 2021 8:44:10 AM	uuid:6685780c-2171-470e-91ca-9ebd37dbd862	1	11	2	Mitindi	May 20, 2021	1370	1	43	1370	1	uuid:6685780c-2171-470e-91ca-9ebd37dbd862/household-information[6]	8	6	3	4	1	0		0		1	1	1	2	1	1	2	3	3	2	0	3	3	2	0	1	1		2	1	2		2	2		2	2
May 25, 2021 8:44:10 AM	uuid:6685780c-2171-470e-91ca-9ebd37dbd862	1	11	2	Mitindi	May 20, 2021	1370	1	43	1370	1	uuid:6685780c-2171-470e-91ca-9ebd37dbd862/household-information[5]	8	5	3	6	1	0		0		1	1	1	2	1	1	2	3	3	2	0	3	3	2	0	1	1		2	1	2		2	2		2	2
May 25, 2021 8:44:10 AM	uuid:6685780c-2171-470e-91ca-9ebd37dbd862	1	11	2	Mitindi	May 20, 2021	1370	1	43	1370	1	uuid:6685780c-2171-470e-91ca-9ebd37dbd862/household-information[8]	8	8	3	3	1	0		0		1	1	1	2	1	1	2	3	3	2	0	3	3	2	0	1	1		2	1	2		2	2		2	2
May 25, 2021 8:44:10 AM	uuid:6685780c-2171-470e-91ca-9ebd37dbd862	1	11	2	Mitindi	May 20, 2021	1370	1	43	1370	1	uuid:6685780c-2171-470e-91ca-9ebd37dbd862/household-information[7]	8	7	3	1	2	0		0		1	1	1	2	1	1	2	3	3	2	0	3	3	2	0	1	1		2	1	2		2	2		2	2
May 25, 2021 8:44:10 AM	uuid:6685780c-2171-470e-91ca-9ebd37dbd862	1	11	2	Mitindi	May 20, 2021	1370	1	43	1370	1	uuid:6685780c-2171-470e-91ca-9ebd37dbd862/household-information[1]	8	1	1	43	2	2		3		1	1	1	2	1	1	2	3	3	2	0	3	3	2	0	1	1		2	1	2		2	2		2	2
May 25, 2021 8:44:10 AM	uuid:6685780c-2171-470e-91ca-9ebd37dbd862	1	11	2	Mitindi	May 20, 2021	1370	1	43	1370	1	uuid:6685780c-2171-470e-91ca-9ebd37dbd862/household-information[4]	8	4	3	14	1	2		3		1	1	1	2	1	1	2	3	3	2	0	3	3	2	0	1	1		2	1	2		2	2		2	2
May 25, 2021 8:44:10 AM	uuid:6685780c-2171-470e-91ca-9ebd37dbd862	1	11	2	Mitindi	May 20, 2021	1370	1	43	1370	1	uuid:6685780c-2171-470e-91ca-9ebd37dbd862/household-information[2]	8	2	3	23	2	2		5		1	1	1	2	1	1	2	3	3	2	0	3	3	2	0	1	1		2	1	2		2	2		2	2
May 25, 2021 8:31:08 AM	uuid:4f25d8fd-bb47-4b50-af75-162ebc55d5b0	11	14	2	Mitindi	May 20, 2021	1372	1	31	1372	2	uuid:4f25d8fd-bb47-4b50-af75-162ebc55d5b0/household-information[2]	6	2	1	34	1	2		3		1	1	1	2	1	1	2	1	3	2	0	1	3	2	0	1	3		4	4	2		3	2		2	2
May 25, 2021 8:31:08 AM	uuid:4f25d8fd-bb47-4b50-af75-162ebc55d5b0	11	14	2	Mitindi	May 20, 2021	1372	1	31	1372	2	uuid:4f25d8fd-bb47-4b50-af75-162ebc55d5b0/household-information[1]	6	1	2	31	2	2		3		1	1	1	2	1	1	2	1	3	2	0	1	3	2	0	1	3		4	4	2		3	2		2	2
May 25, 2021 8:31:08 AM	uuid:4f25d8fd-bb47-4b50-af75-162ebc55d5b0	11	14	2	Mitindi	May 20, 2021	1372	1	31	1372	2	uuid:4f25d8fd-bb47-4b50-af75-162ebc55d5b0/household-information[3]	6	3	3	17	2	2		3		2		1	2	1	1	2	1	3	2	0	1	3	2	0	1	3		4	4	2		3	2		2	2
May 25, 2021 8:31:08 AM	uuid:4f25d8fd-bb47-4b50-af75-162ebc55d5b0	11	14	2	Mitindi	May 20, 2021	1372	1	31	1372	2	uuid:4f25d8fd-bb47-4b50-af75-162ebc55d5b0/household-information[5]	6	5	3	12	1	2		0		1	1	1	2	1	1	2	1	3	2	0	1	3	2	0	1	3		4	4	2		3	2		2	2
May 25, 2021 8:31:08 AM	uuid:4f25d8fd-bb47-4b50-af75-162ebc55d5b0	11	14	2	Mitindi	May 20, 2021	1372	1	31	1372	2	uuid:4f25d8fd-bb47-4b50-af75-162ebc55d5b0/household-information[6]	6	6	3	1	2	0		0		1	1	1	2	1	1	2	1	3	2	0	1	3	2	0	1	3		4	4	2		3	2		2	2
May 25, 2021 8:31:08 AM	uuid:4f25d8fd-bb47-4b50-af75-162ebc55d5b0	11	14	2	Mitindi	May 20, 2021	1372	1	31	1372	2	uuid:4f25d8fd-bb47-4b50-af75-162ebc55d5b0/household-information[4]	6	4	3	13	2	2		0		1	1	1	2	1	1	2	1	3	2	0	1	3	2	0	1	3		4	4	2		3	2		2	2
May 19, 2021 1:07:20 PM	uuid:dda59bff-d581-4e43-97e5-972edd3eb9f2	6	17	2	Mkwazu	May 19, 2021	1373	1	44	1373	1	uuid:dda59bff-d581-4e43-97e5-972edd3eb9f2/household-information[7]	9	7	3	22	2	2		3		2		1	2	1	1	2	2	2	5	0	0	0	0	0	1	3		4	4	2		2	2		2	2
May 19, 2021 1:07:20 PM	uuid:dda59bff-d581-4e43-97e5-972edd3eb9f2	6	17	2	Mkwazu	May 19, 2021	1373	1	44	1373	1	uuid:dda59bff-d581-4e43-97e5-972edd3eb9f2/household-information[9]	9	9	6	2	1	0		0		1	2	1	2	1	1	2	2	2	5	0	0	0	0	0	1	3		4	4	2		2	2		2	2
May 19, 2021 1:07:20 PM	uuid:dda59bff-d581-4e43-97e5-972edd3eb9f2	6	17	2	Mkwazu	May 19, 2021	1373	1	44	1373	1	uuid:dda59bff-d581-4e43-97e5-972edd3eb9f2/household-information[2]	9	2	2	40	2	2		3		1	2	1	2	1	1	2	2	2	5	0	0	0	0	0	1	3		4	4	2		2	2		2	2
May 19, 2021 1:07:20 PM	uuid:dda59bff-d581-4e43-97e5-972edd3eb9f2	6	17	2	Mkwazu	May 19, 2021	1373	1	44	1373	1	uuid:dda59bff-d581-4e43-97e5-972edd3eb9f2/household-information[1]	9	1	1	44	1	2		3		1	2	1	2	1	1	2	2	2	5	0	0	0	0	0	1	3		4	4	2		2	2		2	2
May 19, 2021 1:07:20 PM	uuid:dda59bff-d581-4e43-97e5-972edd3eb9f2	6	17	2	Mkwazu	May 19, 2021	1373	1	44	1373	1	uuid:dda59bff-d581-4e43-97e5-972edd3eb9f2/household-information[8]	9	8	6	4	2	0		0		1	2	1	2	1	1	2	2	2	5	0	0	0	0	0	1	3		4	4	2		2	2		2	2
May 19, 2021 1:07:20 PM	uuid:dda59bff-d581-4e43-97e5-972edd3eb9f2	6	17	2	Mkwazu	May 19, 2021	1373	1	44	1373	1	uuid:dda59bff-d581-4e43-97e5-972edd3eb9f2/household-information[6]	9	6	3	12	1	2		0		1	2	1	2	1	1	2	2	2	5	0	0	0	0	0	1	3		4	4	2		2	2		2	2
May 19, 2021 1:07:20 PM	uuid:dda59bff-d581-4e43-97e5-972edd3eb9f2	6	17	2	Mkwazu	May 19, 2021	1373	1	44	1373	1	uuid:dda59bff-d581-4e43-97e5-972edd3eb9f2/household-information[4]	9	4	3	18	1	2		3		1	2	1	2	1	1	2	2	2	5	0	0	0	0	0	1	3		4	4	2		2	2		2	2
May 19, 2021 1:07:20 PM	uuid:dda59bff-d581-4e43-97e5-972edd3eb9f2	6	17	2	Mkwazu	May 19, 2021	1373	1	44	1373	1	uuid:dda59bff-d581-4e43-97e5-972edd3eb9f2/household-information[3]	9	3	3	24	2	2		3		1	2	1	2	1	1	2	2	2	5	0	0	0	0	0	1	3		4	4	2		2	2		2	2
May 25, 2021 8:50:08 AM	uuid:6fcad6b1-a506-4e86-b5b7-eb34a20a8c46	6	17	2	Mitindi	May 20, 2021	1374	1	33	1374	2	uuid:6fcad6b1-a506-4e86-b5b7-eb34a20a8c46/household-information[4]	6	4	3	10	1	2		4		1	1	2	0	1	1	2	2	2	2	0	2	2	2	0	1	3		4	2	2		1	2		1	2
May 25, 2021 8:50:08 AM	uuid:6fcad6b1-a506-4e86-b5b7-eb34a20a8c46	6	17	2	Mitindi	May 20, 2021	1374	1	33	1374	2	uuid:6fcad6b1-a506-4e86-b5b7-eb34a20a8c46/household-information[1]	6	1	1	39	1	0		4		1	1	2	0	1	1	2	2	2	2	0	2	2	2	0	1	3		4	2	2		1	2		1	2
May 25, 2021 8:50:08 AM	uuid:6fcad6b1-a506-4e86-b5b7-eb34a20a8c46	6	17	2	Mitindi	May 20, 2021	1374	1	33	1374	2	uuid:6fcad6b1-a506-4e86-b5b7-eb34a20a8c46/household-information[3]	6	3	3	14	2	0		4		1	1	2	0	1	1	2	2	2	2	0	2	2	2	0	1	3		4	2	2		1	2		1	2
May 25, 2021 8:50:08 AM	uuid:6fcad6b1-a506-4e86-b5b7-eb34a20a8c46	6	17	2	Mitindi	May 20, 2021	1374	1	33	1374	2	uuid:6fcad6b1-a506-4e86-b5b7-eb34a20a8c46/household-information[6]	6	6	3	1	2	0		0		1	1	2	0	1	1	2	2	2	2	0	2	2	2	0	1	3		4	2	2		1	2		1	2
May 25, 2021 8:50:08 AM	uuid:6fcad6b1-a506-4e86-b5b7-eb34a20a8c46	6	17	2	Mitindi	May 20, 2021	1374	1	33	1374	2	uuid:6fcad6b1-a506-4e86-b5b7-eb34a20a8c46/household-information[5]	6	5	3	5	1	0		0		1	1	2	0	1	1	2	2	2	2	0	2	2	2	0	1	3		4	2	2		1	2		1	2
May 25, 2021 8:50:08 AM	uuid:6fcad6b1-a506-4e86-b5b7-eb34a20a8c46	6	17	2	Mitindi	May 20, 2021	1374	1	33	1374	2	uuid:6fcad6b1-a506-4e86-b5b7-eb34a20a8c46/household-information[2]	6	2	2	33	2	2		4		1	1	2	0	1	1	2	2	2	2	0	2	2	2	0	1	3		4	2	2		1	2		1	2
May 25, 2021 8:44:11 AM	uuid:3be84407-a5b4-4495-8e09-7c0941262287	1	11	2	Mitindi	May 20, 2021	1375	1	60	1375	1	uuid:3be84407-a5b4-4495-8e09-7c0941262287/household-information[3]	6	3	3	25	1	0		0		1	2	1	2	1	1	2	0	1	5	0	0	0	2	0	1	3		4	2	2		2	2		2	2
May 25, 2021 8:44:11 AM	uuid:3be84407-a5b4-4495-8e09-7c0941262287	1	11	2	Mitindi	May 20, 2021	1375	1	60	1375	1	uuid:3be84407-a5b4-4495-8e09-7c0941262287/household-information[5]	6	5	5	19	2	0		3		1	2	1	2	1	1	2	0	1	5	0	0	0	2	0	1	3		4	2	2		2	2		2	2
May 25, 2021 8:44:11 AM	uuid:3be84407-a5b4-4495-8e09-7c0941262287	1	11	2	Mitindi	May 20, 2021	1375	1	60	1375	1	uuid:3be84407-a5b4-4495-8e09-7c0941262287/household-information[2]	6	2	2	50	2	0		0		1	1	1	2	1	1	2	0	1	5	0	0	0	2	0	1	3		4	2	2		2	2		2	2
May 25, 2021 8:44:11 AM	uuid:3be84407-a5b4-4495-8e09-7c0941262287	1	11	2	Mitindi	May 20, 2021	1375	1	60	1375	1	uuid:3be84407-a5b4-4495-8e09-7c0941262287/household-information[6]	6	6	6	7	2	0		0		1	2	1	2	1	1	2	0	1	5	0	0	0	2	0	1	3		4	2	2		2	2		2	2
May 25, 2021 8:44:11 AM	uuid:3be84407-a5b4-4495-8e09-7c0941262287	1	11	2	Mitindi	May 20, 2021	1375	1	60	1375	1	uuid:3be84407-a5b4-4495-8e09-7c0941262287/household-information[1]	6	1	1	60	1	2		3		1	1	1	2	1	1	2	0	1	5	0	0	0	2	0	1	3		4	2	2		2	2		2	2
May 25, 2021 8:44:11 AM	uuid:3be84407-a5b4-4495-8e09-7c0941262287	1	11	2	Mitindi	May 20, 2021	1375	1	60	1375	1	uuid:3be84407-a5b4-4495-8e09-7c0941262287/household-information[4]	6	4	5	29	1	2		3		1	2	1	2	1	1	2	0	1	5	0	0	0	2	0	1	3		4	2	2		2	2		2	2
May 19, 2021 1:12:17 PM	uuid:d66d0ecb-1229-45b0-8d40-2a86d483bd9f	10	13	2	Mkwazu	May 19, 2021	1376	1	35	1376	1	uuid:d66d0ecb-1229-45b0-8d40-2a86d483bd9f/household-information[5]	6	5	3	6	1	0		0		1	1	1	2	1	1	2	1	3	2	0	1	3	2	0	1	3		4	8	0		2	5	Processed wood	2	6
May 19, 2021 1:12:17 PM	uuid:d66d0ecb-1229-45b0-8d40-2a86d483bd9f	10	13	2	Mkwazu	May 19, 2021	1376	1	35	1376	1	uuid:d66d0ecb-1229-45b0-8d40-2a86d483bd9f/household-information[3]	6	3	3	13	1	2		6	student	1	1	1	2	1	1	2	1	3	2	0	1	3	2	0	1	3		4	8	0		2	5	Processed wood	2	6
May 19, 2021 1:12:17 PM	uuid:d66d0ecb-1229-45b0-8d40-2a86d483bd9f	10	13	2	Mkwazu	May 19, 2021	1376	1	35	1376	1	uuid:d66d0ecb-1229-45b0-8d40-2a86d483bd9f/household-information[2]	6	2	2	33	2	2		3		1	1	1	2	1	1	2	1	3	2	0	1	3	2	0	1	3		4	8	0		2	5	Processed wood	2	6
May 19, 2021 1:12:17 PM	uuid:d66d0ecb-1229-45b0-8d40-2a86d483bd9f	10	13	2	Mkwazu	May 19, 2021	1376	1	35	1376	1	uuid:d66d0ecb-1229-45b0-8d40-2a86d483bd9f/household-information[4]	6	4	3	11	1	2		6	student	1	1	1	2	1	1	2	1	3	2	0	1	3	2	0	1	3		4	8	0		2	5	Processed wood	2	6
May 19, 2021 1:12:17 PM	uuid:d66d0ecb-1229-45b0-8d40-2a86d483bd9f	10	13	2	Mkwazu	May 19, 2021	1376	1	35	1376	1	uuid:d66d0ecb-1229-45b0-8d40-2a86d483bd9f/household-information[1]	6	1	1	35	1	2		3		1	1	1	2	1	1	2	1	3	2	0	1	3	2	0	1	3		4	8	0		2	5	Processed wood	2	6
May 19, 2021 1:12:17 PM	uuid:d66d0ecb-1229-45b0-8d40-2a86d483bd9f	10	13	2	Mkwazu	May 19, 2021	1376	1	35	1376	1	uuid:d66d0ecb-1229-45b0-8d40-2a86d483bd9f/household-information[6]	6	6	3	1	2	0		0		1	1	1	2	1	1	2	1	3	2	0	1	3	2	0	1	3		4	8	0		2	5	Processed wood	2	6
May 25, 2021 8:48:31 AM	uuid:a28f443f-2da7-489f-88ec-0862e77c4297	10	13	2	Mitindi	May 20, 2021	1377	1	70	1377	1	uuid:a28f443f-2da7-489f-88ec-0862e77c4297/household-information[1]	2	1	1	70	1	2		3		1	1	1	2	1	1	2	0	0	2	0	0	0	2	0	1	3		4	4	0		2	5	Processed wood	2	2
May 25, 2021 8:31:10 AM	uuid:de85980e-a179-4dcf-af2c-87d9b43c1874	4	14	2	Mitindi	May 20, 2021	1378	1	39	1378	1	uuid:de85980e-a179-4dcf-af2c-87d9b43c1874/household-information[1]	5	1	1	39	1	0		3		1	1	1	0	1	1	2	0	3	2	0	0	3	2	0	1	3		4	2	1		2	2		2	2
May 25, 2021 8:31:10 AM	uuid:de85980e-a179-4dcf-af2c-87d9b43c1874	4	14	2	Mitindi	May 20, 2021	1378	1	39	1378	1	uuid:de85980e-a179-4dcf-af2c-87d9b43c1874/household-information[4]	5	4	3	6	1	0		0		1	1	1	0	1	1	2	0	3	2	0	0	3	2	0	1	3		4	2	1		2	2		2	2
May 25, 2021 8:31:10 AM	uuid:de85980e-a179-4dcf-af2c-87d9b43c1874	4	14	2	Mitindi	May 20, 2021	1378	1	39	1378	1	uuid:de85980e-a179-4dcf-af2c-87d9b43c1874/household-information[2]	5	2	2	31	1	0		3		1	1	1	0	1	1	2	0	3	2	0	0	3	2	0	1	3		4	2	1		2	2		2	2
May 25, 2021 8:31:10 AM	uuid:de85980e-a179-4dcf-af2c-87d9b43c1874	4	14	2	Mitindi	May 20, 2021	1378	1	39	1378	1	uuid:de85980e-a179-4dcf-af2c-87d9b43c1874/household-information[3]	5	3	3	10	2	2		0		1	1	1	0	1	1	2	0	3	2	0	0	3	2	0	1	3		4	2	1		2	2		2	2
May 25, 2021 8:50:09 AM	uuid:9a029fd9-5e18-46b7-a874-0075a1afca18	16	17	2	Mitindi	May 20, 2021	1379	1	24	1379	2	uuid:9a029fd9-5e18-46b7-a874-0075a1afca18/household-information[4]	4	4	3	1	2	0		0		1	2	1	2	1	1	2	2	0	2	0	2	0	2	0	1	3		4	2	2		1	3		2	2
May 25, 2021 8:50:09 AM	uuid:9a029fd9-5e18-46b7-a874-0075a1afca18	16	17	2	Mitindi	May 20, 2021	1379	1	24	1379	2	uuid:9a029fd9-5e18-46b7-a874-0075a1afca18/household-information[3]	4	3	3	4	1	0		0		1	2	1	2	1	1	2	2	0	2	0	2	0	2	0	1	3		4	2	2		1	3		2	2
May 25, 2021 8:50:09 AM	uuid:9a029fd9-5e18-46b7-a874-0075a1afca18	16	17	2	Mitindi	May 20, 2021	1379	1	24	1379	2	uuid:9a029fd9-5e18-46b7-a874-0075a1afca18/household-information[2]	4	2	2	24	2	2		4		1	2	1	2	1	1	2	2	0	2	0	2	0	2	0	1	3		4	2	2		1	3		2	2
May 25, 2021 8:50:09 AM	uuid:9a029fd9-5e18-46b7-a874-0075a1afca18	16	17	2	Mitindi	May 20, 2021	1379	1	24	1379	2	uuid:9a029fd9-5e18-46b7-a874-0075a1afca18/household-information[1]	4	1	1	42	1	2		4		1	2	1	2	1	1	2	2	0	2	0	2	0	2	0	1	3		4	2	2		1	3		2	2
May 25, 2021 8:44:13 AM	uuid:30b258c6-73f2-40ad-b1ee-31eafe3c0e57	5	11	2	Mitindi	May 20, 2021	1380	1	18	1380	1	uuid:30b258c6-73f2-40ad-b1ee-31eafe3c0e57/household-information[2]	2	2	2	50	1	1		4		1	1	1	1	1	1	2	0	0	2	0	0	0	2	0	1	1		2	2	2		1	2		2	2
May 25, 2021 8:44:13 AM	uuid:30b258c6-73f2-40ad-b1ee-31eafe3c0e57	5	11	2	Mitindi	May 20, 2021	1380	1	18	1380	1	uuid:30b258c6-73f2-40ad-b1ee-31eafe3c0e57/household-information[1]	2	1	1	18	2	0		4		1	1	1	1	1	1	2	0	0	2	0	0	0	2	0	1	1		2	2	2		1	2		2	2
May 25, 2021 8:31:11 AM	uuid:ff5fc2ad-5a6e-4ea5-a2d8-037b04851d30	4	14	2	Mitindi	May 20, 2021	1381	1	70	1381	2	uuid:ff5fc2ad-5a6e-4ea5-a2d8-037b04851d30/household-information[2]	5	2	2	70	2	2		3		1	1	1	2	1	1	2	0	0	5	0	0	0	5	0	1	3		1	5	3		2	3		2	6
May 25, 2021 8:31:11 AM	uuid:ff5fc2ad-5a6e-4ea5-a2d8-037b04851d30	4	14	2	Mitindi	May 20, 2021	1381	1	70	1381	2	uuid:ff5fc2ad-5a6e-4ea5-a2d8-037b04851d30/household-information[4]	5	4	3	37	1	2		3		1	1	1	2	1	1	2	0	0	5	0	0	0	5	0	1	3		1	5	3		2	3		2	6
May 25, 2021 8:31:11 AM	uuid:ff5fc2ad-5a6e-4ea5-a2d8-037b04851d30	4	14	2	Mitindi	May 20, 2021	1381	1	70	1381	2	uuid:ff5fc2ad-5a6e-4ea5-a2d8-037b04851d30/household-information[5]	5	5	3	31	1	2		3		1	1	1	2	1	1	2	0	0	5	0	0	0	5	0	1	3		1	5	3		2	3		2	6
May 25, 2021 8:31:11 AM	uuid:ff5fc2ad-5a6e-4ea5-a2d8-037b04851d30	4	14	2	Mitindi	May 20, 2021	1381	1	70	1381	2	uuid:ff5fc2ad-5a6e-4ea5-a2d8-037b04851d30/household-information[1]	5	1	1	75	1	2		3		1	1	1	2	1	1	2	0	0	5	0	0	0	5	0	1	3		1	5	3		2	3		2	6
May 25, 2021 8:50:10 AM	uuid:d07bf273-3304-4908-97b2-e82a51d8d362	6	17	2	Mitindi	May 20, 2021	1382	1	86	1382	1	uuid:d07bf273-3304-4908-97b2-e82a51d8d362/household-information[2]	6	2	2	56	2	1		3		1	2	2	1	1	1	2	1	2	3	0	0	0	0	0	1	3		4	4	0		2	2		2	2
May 25, 2021 8:50:10 AM	uuid:d07bf273-3304-4908-97b2-e82a51d8d362	6	17	2	Mitindi	May 20, 2021	1382	1	86	1382	1	uuid:d07bf273-3304-4908-97b2-e82a51d8d362/household-information[4]	6	4	6	14	2	2		0		1	2	2	1	1	1	2	1	2	3	0	0	0	0	0	1	3		4	4	0		2	2		2	2
May 25, 2021 8:50:10 AM	uuid:d07bf273-3304-4908-97b2-e82a51d8d362	6	17	2	Mitindi	May 20, 2021	1382	1	86	1382	1	uuid:d07bf273-3304-4908-97b2-e82a51d8d362/household-information[3]	6	3	4	28	2	1		3		1	2	2	1	1	1	2	1	2	3	0	0	0	0	0	1	3		4	4	0		2	2		2	2
May 25, 2021 8:50:10 AM	uuid:d07bf273-3304-4908-97b2-e82a51d8d362	6	17	2	Mitindi	May 20, 2021	1382	1	86	1382	1	uuid:d07bf273-3304-4908-97b2-e82a51d8d362/household-information[1]	6	1	1	86	1	1		3		1	2	2	1	1	1	2	1	2	3	0	0	0	0	0	1	3		4	4	0		2	2		2	2
May 25, 2021 8:50:10 AM	uuid:d07bf273-3304-4908-97b2-e82a51d8d362	6	17	2	Mitindi	May 20, 2021	1382	1	86	1382	1	uuid:d07bf273-3304-4908-97b2-e82a51d8d362/household-information[6]	6	6	3	3	2	0		0		1	2	2	1	1	1	2	1	2	3	0	0	0	0	0	1	3		4	4	0		2	2		2	2
May 25, 2021 8:50:10 AM	uuid:d07bf273-3304-4908-97b2-e82a51d8d362	6	17	2	Mitindi	May 20, 2021	1382	1	86	1382	1	uuid:d07bf273-3304-4908-97b2-e82a51d8d362/household-information[5]	6	5	6	12	2	2		0		1	2	2	1	1	1	2	1	2	3	0	0	0	0	0	1	3		4	4	0		2	2		2	2
May 19, 2021 1:12:26 PM	uuid:acf916c5-6711-43f9-a7a4-f381892e6e88	9	13	2	Mkwazu	May 19, 2021	1383	1	60	1383	1	uuid:acf916c5-6711-43f9-a7a4-f381892e6e88/household-information[1]	2	1	1	60	2	0		3		1	1	2	0	1	1	2	0	1	1	0	0	1	1	0	1	3		4	2	1		1	0		2	2
May 19, 2021 1:12:26 PM	uuid:acf916c5-6711-43f9-a7a4-f381892e6e88	9	13	2	Mkwazu	May 19, 2021	1383	1	60	1383	1	uuid:acf916c5-6711-43f9-a7a4-f381892e6e88/household-information[2]	2	2	6	11	1	2		6	student	1	1	2	0	1	1	2	0	1	1	0	0	1	1	0	1	3		4	2	1		1	0		2	2
5/25/2021 8:44	uuid:804ed29a-8684-4249-9256-0ea89ac1084a	5	11	3	Kudigongo	24-May-21	1384	1	61	1384	1	uuid:804ed29a-8684-4249-9256-0ea89ac1084a/household-information[1]	3	1	1	61	1	2		3		1	1	1	2	1	1	2	0	1	2	0	0	1	2	0	1	3		4	1	2		1	2		2	2
5/25/2021 8:44	uuid:804ed29a-8684-4249-9256-0ea89ac1084a	5	11	3	Kudigongo	24-May-21	1384	1	61	1384	1	uuid:804ed29a-8684-4249-9256-0ea89ac1084a/household-information[3]	3	3	6	16	1	3		0		1	1	1	2	1	1	2	0	1	2	0	0	1	2	0	1	3		4	1	2		1	2		2	2
May 25, 2021 8:48:33 AM	uuid:3a287014-dbb9-4b2e-be5a-e8b09cc5202e	9	13	2	Mitindi	May 20, 2021	1385	1	44	1385	1	uuid:3a287014-dbb9-4b2e-be5a-e8b09cc5202e/household-information[4]	8	4	3	16	2	2		6	student	1	2	2	0	1	1	2	1	4	3	0	0	0	0	0	1	1		4	2	1		1	5	Processed wood	2	2
May 25, 2021 8:48:33 AM	uuid:3a287014-dbb9-4b2e-be5a-e8b09cc5202e	9	13	2	Mitindi	May 20, 2021	1385	1	44	1385	1	uuid:3a287014-dbb9-4b2e-be5a-e8b09cc5202e/household-information[1]	8	1	1	44	2	0		3		1	2	2	0	1	1	2	1	4	3	0	0	0	0	0	1	1		4	2	1		1	5	Processed wood	2	2
May 25, 2021 8:48:33 AM	uuid:3a287014-dbb9-4b2e-be5a-e8b09cc5202e	9	13	2	Mitindi	May 20, 2021	1385	1	44	1385	1	uuid:3a287014-dbb9-4b2e-be5a-e8b09cc5202e/household-information[6]	8	6	3	10	1	2		6	student	1	2	2	0	1	1	2	1	4	3	0	0	0	0	0	1	1		4	2	1		1	5	Processed wood	2	2
May 25, 2021 8:48:33 AM	uuid:3a287014-dbb9-4b2e-be5a-e8b09cc5202e	9	13	2	Mitindi	May 20, 2021	1385	1	44	1385	1	uuid:3a287014-dbb9-4b2e-be5a-e8b09cc5202e/household-information[8]	8	8	3	2	2	0		0		1	2	2	0	1	1	2	1	4	3	0	0	0	0	0	1	1		4	2	1		1	5	Processed wood	2	2
May 25, 2021 8:48:33 AM	uuid:3a287014-dbb9-4b2e-be5a-e8b09cc5202e	9	13	2	Mitindi	May 20, 2021	1385	1	44	1385	1	uuid:3a287014-dbb9-4b2e-be5a-e8b09cc5202e/household-information[3]	8	3	3	21	1	0		3		1	2	2	0	1	1	2	1	4	3	0	0	0	0	0	1	1		4	2	1		1	5	Processed wood	2	2
May 25, 2021 8:48:33 AM	uuid:3a287014-dbb9-4b2e-be5a-e8b09cc5202e	9	13	2	Mitindi	May 20, 2021	1385	1	44	1385	1	uuid:3a287014-dbb9-4b2e-be5a-e8b09cc5202e/household-information[7]	8	7	3	7	1	0		0		1	2	2	0	1	1	2	1	4	3	0	0	0	0	0	1	1		4	2	1		1	5	Processed wood	2	2
May 25, 2021 8:48:33 AM	uuid:3a287014-dbb9-4b2e-be5a-e8b09cc5202e	9	13	2	Mitindi	May 20, 2021	1385	1	44	1385	1	uuid:3a287014-dbb9-4b2e-be5a-e8b09cc5202e/household-information[5]	8	5	3	13	2	2		6	student	1	2	2	0	1	1	2	1	4	3	0	0	0	0	0	1	1		4	2	1		1	5	Processed wood	2	2
May 25, 2021 8:48:33 AM	uuid:3a287014-dbb9-4b2e-be5a-e8b09cc5202e	9	13	2	Mitindi	May 20, 2021	1385	1	44	1385	1	uuid:3a287014-dbb9-4b2e-be5a-e8b09cc5202e/household-information[2]	8	2	2	46	1	0		3		1	2	2	0	1	1	2	1	4	3	0	0	0	0	0	1	1		4	2	1		1	5	Processed wood	2	2
May 25, 2021 8:31:12 AM	uuid:987e9a40-da29-4058-9dc6-c2863b650717	4	14	2	Mitindi	May 20, 2021	1386	1	32	1386	1	uuid:987e9a40-da29-4058-9dc6-c2863b650717/household-information[2]	4	2	3	5	2	0		4		1	1	2	0	1	1	2	1	2	1	0	1	2	1	0	1	3		4	2	2		1	2		2	2
May 25, 2021 8:31:12 AM	uuid:987e9a40-da29-4058-9dc6-c2863b650717	4	14	2	Mitindi	May 20, 2021	1386	1	32	1386	1	uuid:987e9a40-da29-4058-9dc6-c2863b650717/household-information[3]	4	3	3	17	1	3		0		1	1	2	0	1	1	2	1	2	1	0	1	2	1	0	1	3		4	2	2		1	2		2	2
May 25, 2021 8:31:12 AM	uuid:987e9a40-da29-4058-9dc6-c2863b650717	4	14	2	Mitindi	May 20, 2021	1386	1	32	1386	1	uuid:987e9a40-da29-4058-9dc6-c2863b650717/household-information[1]	4	1	1	32	2	0		4		1	1	2	0	1	1	2	1	2	1	0	1	2	1	0	1	3		4	2	2		1	2		2	2
5/25/2021 8:50	uuid:54e3b4bc-0971-44d1-9b63-646acd02d3f5	2	12	3	Kudigongo	24-May-21	1387	1	70	1387	1	uuid:54e3b4bc-0971-44d1-9b63-646acd02d3f5/household-information[2]	2	2	2	40	2	2		3		1	1	1	2	1	1	2	0	0	2	0	0	0	2	0	1	3		6	5	2		2	2		2	2
5/25/2021 8:50	uuid:54e3b4bc-0971-44d1-9b63-646acd02d3f5	2	12	3	Kudigongo	24-May-21	1387	1	70	1387	1	uuid:54e3b4bc-0971-44d1-9b63-646acd02d3f5/household-information[1]	2	1	1	70	1	2		3		1	1	1	2	1	1	2	0	0	2	0	0	0	2	0	1	3		6	5	2		2	2		2	2
5/25/2021 8:48	uuid:8653dff5-a32f-45d2-ac08-e611e85734ef	9	13	3	Kudigongo	24-May-21	1388	1	46	1388	1	uuid:8653dff5-a32f-45d2-ac08-e611e85734ef/household-information[4]	7	4	3	13	2	2		6	student	1	1	1	2	1	1	2	1	3	3	0	1	3	3	0	1	3		4	3	5	steel bar	2	5	Processed wood	2	2
5/25/2021 8:48	uuid:8653dff5-a32f-45d2-ac08-e611e85734ef	9	13	3	Kudigongo	24-May-21	1388	1	46	1388	1	uuid:8653dff5-a32f-45d2-ac08-e611e85734ef/household-information[1]	7	1	1	46	2	2		3		1	1	1	2	1	1	2	1	3	3	0	1	3	3	0	1	3		4	3	5	steel bar	2	5	Processed wood	2	2
5/25/2021 8:48	uuid:8653dff5-a32f-45d2-ac08-e611e85734ef	9	13	3	Kudigongo	24-May-21	1388	1	46	1388	1	uuid:8653dff5-a32f-45d2-ac08-e611e85734ef/household-information[6]	7	6	6	6	2	1		6	student	1	1	1	2	1	1	2	1	3	3	0	1	3	3	0	1	3		4	3	5	steel bar	2	5	Processed wood	2	2
5/25/2021 8:48	uuid:8653dff5-a32f-45d2-ac08-e611e85734ef	9	13	3	Kudigongo	24-May-21	1388	1	46	1388	1	uuid:8653dff5-a32f-45d2-ac08-e611e85734ef/household-information[3]	7	3	3	22	2	2		0		1	1	1	2	1	1	2	1	3	3	0	1	3	3	0	1	3		4	3	5	steel bar	2	5	Processed wood	2	2
5/25/2021 8:48	uuid:8653dff5-a32f-45d2-ac08-e611e85734ef	9	13	3	Kudigongo	24-May-21	1388	1	46	1388	1	uuid:8653dff5-a32f-45d2-ac08-e611e85734ef/household-information[5]	7	5	3	10	1	0		6	student	1	1	1	2	1	1	2	1	3	3	0	1	3	3	0	1	3		4	3	5	steel bar	2	5	Processed wood	2	2
5/25/2021 8:48	uuid:8653dff5-a32f-45d2-ac08-e611e85734ef	9	13	3	Kudigongo	24-May-21	1388	1	46	1388	1	uuid:8653dff5-a32f-45d2-ac08-e611e85734ef/household-information[2]	7	2	3	32	2	3		0		1	1	1	2	1	1	2	1	3	3	0	1	3	3	0	1	3		4	3	5	steel bar	2	5	Processed wood	2	2
May 25, 2021 8:48:35 AM	uuid:ea8fc18f-a563-433e-9093-1536e319eedb	10	13	2	Mitindi	May 20, 2021	1389	1	36	1389	1	uuid:ea8fc18f-a563-433e-9093-1536e319eedb/household-information[3]	3	3	3	16	1	0		4		1	2	1	2	1	1	2	0	1	2	0	0	1	2	0	1	3		4	2	5	Processed wood	1	3		2	2
May 25, 2021 8:48:35 AM	uuid:ea8fc18f-a563-433e-9093-1536e319eedb	10	13	2	Mitindi	May 20, 2021	1389	1	36	1389	1	uuid:ea8fc18f-a563-433e-9093-1536e319eedb/household-information[2]	3	2	2	49	1	0		4		1	2	1	2	1	1	2	0	1	2	0	0	1	2	0	1	3		4	2	5	Processed wood	1	3		2	2
May 25, 2021 8:48:35 AM	uuid:ea8fc18f-a563-433e-9093-1536e319eedb	10	13	2	Mitindi	May 20, 2021	1389	1	36	1389	1	uuid:ea8fc18f-a563-433e-9093-1536e319eedb/household-information[1]	3	1	1	36	2	2		4		1	2	1	2	1	1	2	0	1	2	0	0	1	2	0	1	3		4	2	5	Processed wood	1	3		2	2
May 19, 2021 1:12:31 PM	uuid:1dac45a9-23c9-4209-b75b-5e8b71cf86a0	9	13	2	Mkwazu	May 19, 2021	1390	1	49	1390	1	uuid:1dac45a9-23c9-4209-b75b-5e8b71cf86a0/household-information[8]	8	8	11	70	1	0		3		1	2	1	2	1	1	2	1	3	4	0	1	3	4	0	1	3		4	1	1		2	3		2	2
May 19, 2021 1:12:31 PM	uuid:1dac45a9-23c9-4209-b75b-5e8b71cf86a0	9	13	2	Mkwazu	May 19, 2021	1390	1	49	1390	1	uuid:1dac45a9-23c9-4209-b75b-5e8b71cf86a0/household-information[3]	8	3	3	22	2	2		3		1	2	1	2	1	1	2	1	3	4	0	1	3	4	0	1	3		4	1	1		2	3		2	2
May 19, 2021 1:12:31 PM	uuid:1dac45a9-23c9-4209-b75b-5e8b71cf86a0	9	13	2	Mkwazu	May 19, 2021	1390	1	49	1390	1	uuid:1dac45a9-23c9-4209-b75b-5e8b71cf86a0/household-information[7]	8	7	6	6	1	0		0		1	2	1	2	1	1	2	1	3	4	0	1	3	4	0	1	3		4	1	1		2	3		2	2
May 19, 2021 1:12:31 PM	uuid:1dac45a9-23c9-4209-b75b-5e8b71cf86a0	9	13	2	Mkwazu	May 19, 2021	1390	1	49	1390	1	uuid:1dac45a9-23c9-4209-b75b-5e8b71cf86a0/household-information[1]	8	1	1	49	1	3		3		1	2	1	2	1	1	2	1	3	4	0	1	3	4	0	1	3		4	1	1		2	3		2	2
May 19, 2021 1:12:31 PM	uuid:1dac45a9-23c9-4209-b75b-5e8b71cf86a0	9	13	2	Mkwazu	May 19, 2021	1390	1	49	1390	1	uuid:1dac45a9-23c9-4209-b75b-5e8b71cf86a0/household-information[2]	8	2	2	41	2	2		3		1	2	1	2	1	1	2	1	3	4	0	1	3	4	0	1	3		4	1	1		2	3		2	2
May 19, 2021 1:12:31 PM	uuid:1dac45a9-23c9-4209-b75b-5e8b71cf86a0	9	13	2	Mkwazu	May 19, 2021	1390	1	49	1390	1	uuid:1dac45a9-23c9-4209-b75b-5e8b71cf86a0/household-information[4]	8	4	3	12	2	2		6	student	1	2	1	2	1	1	2	1	3	4	0	1	3	4	0	1	3		4	1	1		2	3		2	2
May 19, 2021 1:12:31 PM	uuid:1dac45a9-23c9-4209-b75b-5e8b71cf86a0	9	13	2	Mkwazu	May 19, 2021	1390	1	49	1390	1	uuid:1dac45a9-23c9-4209-b75b-5e8b71cf86a0/household-information[6]	8	6	3	2	2	0		0		1	2	1	2	1	1	2	1	3	4	0	1	3	4	0	1	3		4	1	1		2	3		2	2
May 25, 2021 8:50:25 AM	uuid:8931eeb4-27f2-49cd-9fd1-36847758fbc7	2	12	2	Kibonkho	May 20, 2021	1391	1	21	1391	1	uuid:8931eeb4-27f2-49cd-9fd1-36847758fbc7/household-information[1]	2	1	1	21	1	2		3		1	1	1	2	1	1	2	0	0	2	0	0	0	2	0	1	3		3	4	2		2	0		2	5
May 25, 2021 8:50:25 AM	uuid:8931eeb4-27f2-49cd-9fd1-36847758fbc7	2	12	2	Kibonkho	May 20, 2021	1391	1	21	1391	1	uuid:8931eeb4-27f2-49cd-9fd1-36847758fbc7/household-information[2]	2	2	9	20	1	2		3		1	1	1	2	1	1	2	0	0	2	0	0	0	2	0	1	3		3	4	2		2	0		2	5
5/25/2021 8:37	uuid:bca0edfa-d7fb-4fed-9971-5c917fe8df9e	11	14	3	Kudigongo	24-May-21	1392	1	59	1392	1	uuid:bca0edfa-d7fb-4fed-9971-5c917fe8df9e/household-information[2]	3	2	6	11	2	2		0		1	1	1	2	1	1	2	0	2	1	0	0	2	1	0	1	3		4	8	2		3	2		2	2
5/25/2021 8:37	uuid:bca0edfa-d7fb-4fed-9971-5c917fe8df9e	11	14	3	Kudigongo	24-May-21	1392	1	59	1392	1	uuid:bca0edfa-d7fb-4fed-9971-5c917fe8df9e/household-information[1]	3	1	1	59	2	2		3		1	1	1	2	1	1	2	0	2	1	0	0	2	1	0	1	3		4	8	2		3	2		2	2
5/25/2021 8:37	uuid:bca0edfa-d7fb-4fed-9971-5c917fe8df9e	11	14	3	Kudigongo	24-May-21	1392	1	59	1392	1	uuid:bca0edfa-d7fb-4fed-9971-5c917fe8df9e/household-information[3]	3	3	6	15	2	3		0		2		1	2	1	1	2	0	2	1	0	0	2	1	0	1	3		4	8	2		3	2		2	2
[truncated: 221 more rows]
[truncated: 44 more columns]

## Sheet: Baseline Dictionary
Variable name	Questions	Code and label
[truncated: 94 more rows]

## Sheet: Technician Aes
submissiondate	key	technician	tablet	village	date	responder	consent	agreeskinitching	agreefacialburning	agreesneezing	agreenosedischarge	agreeheadache	agreenausea	agreeeyeirritation	agreetears	agreebadsmell	agreeothersymptoms	agreespecificsymptoms	agreereport
[truncated: 20 more rows]

[truncated: 12 more sheets: Dictionary Tech Aes, HH members Aes, Dictionary HH members Aes, Long rain malaria data, Short rain malaria data, Malaria data dictionary, CDC mosquito data, CDC mosquito data dictionary , Cone bioassay data, Cone bioassay dictionary , HPLC chemical data, HPLC dictionary]
