# Supplementary material for: A household randomised-control trial of insecticide-treated screening for malarial control in unimproved houses in Tanzania
Source: Research Square preprint supplement (doi:10.21203/rs.3.rs-6218916/v1), 2025-03-28
Supplement: Supplementary file 3 [file da954ee834aaa1be51921181.docx]

Efficacy of Insecticide Treated Eave Nets and Insecticide Treated Window screens on malaria in Tanzania**. To be filled in before the interview**

1. Initial of Data collector |___|___|___| 2. Date : |___|___| / |___|___| / |___|___| (*Day/month/year*) 3. Village name: _______________________ 4. Name of sub-village : ______________________

5. Name of leader of sub-village (First/Middle/Last) : __________________________________________________________ 6. Household code |____|____|____|____| 7. Repeat Household code |____|____|____|____|

8.GPRS coordinates of household: Southings |____|____|____|____|____|____|____|____|____|____| Eastings |____|____|____|____|____|____|____|____|____|____| Elevation |____|____|____|____|____|____|____|____|____|____|

9. Is the household available for testing? [__] Yes [__] No, why? [__] Damaged [__] Relocated ________________________ [__] Travelled and return unknown

10. Do you agree to take part in the malaria testing?? [__] Yes [__] No – Stop 11. Responder? [__] Head of househod [__] Spouse[__] Adult resident older than 18 years old

12. Age of responder |___|___|___| [Responder must be older than 18] 13. Name of head of household (First-Middle-Last): __________________________________________________________ 14. How many people are available in the household? |___|___|

| A. Head of household=1, Souse=2, Child=3, brother or sister=4, Nephew or niece=5, Grandchild=6, son or dauther-in-law=7, Grandfather or grandmother=8, Other relative=9, Adopted/foster/step child=10, Mother/Father =11, Not related= 12.  B. Gender: Male=1, Female=2  C. Highest education: No formal=0, Pre-primary=1, Primary=2, Secondary= 3, Tertiary =4, Other = 5, mention in the box.  D. Major occupation: None=0, Salary=1, Business=2, Farming=3, Livestock=4, Service=5 Other =6, specify in the box  E. Slept in the house last night? Slept under the bednet last night? If interested in malaria testing, Travelled in the last two weeks?Taken anti malaria for the past one month*?* Are you feeling unwell? No=0, Yes =1.  F. If interested in malaria testing, what’s residence status? Permanent residence = 1, Visitor = 2***, If not present (Revisit) = 3***  G. Malaria status by RDT/QPCR: Positive: Plasmodium falciparum=PfPos+, Negative= PfNeg- | | | | | | | | | | | | | | | | | | | | | |
| --- | --- | --- | --- | --- | --- | --- | --- | --- | --- | --- | --- | --- | --- | --- | --- | --- | --- | --- | --- | --- | --- |
| Serial | 15. Informed Consent id | 16. Name of participant (First name only) | 17. Relation to head of household | 18. Age | 19. Gender | 20. Highest education | 21. Major occupation | 22. Slept in the household last night? | *23. Slept under bednet last night?* | *24.* Are interested in malaria testing? | *25.* Household residence status? | *26.* Taken anti malaria within the last two weeks? | *27.* Travelled in the last two weeks? | 28. Initial of blood drawer? | 29. Do you have fever? | *30. If unwell, measure right Ear Temperature in Celsius, if not possible measure left ear.* | 31. mRDT code | 32. Code assigned to blood for PCR | *33. Malaria status by mRDT* | *34. Malaria status by qPCR* | *35.* Molecular quantification Plasmodium falciparum |
|  |  |  |  |  |  |  |  |  |  |  |  |  |  |  |  |  |  |  |  |  | ________/µl |
|  |  |  |  |  |  |  |  |  |  |  |  |  |  |  |  |  |  |  |  |  | ________/µl |
|  |  |  |  |  |  |  |  |  |  |  |  |  |  |  |  |  |  |  |  |  | ________/µl |
|  |  |  |  |  |  |  |  |  |  |  |  |  |  |  |  |  |  |  |  |  | ________/µl |
|  |  |  |  |  |  |  |  |  |  |  |  |  |  |  |  |  |  |  |  |  | ________/µl |
|  |  |  |  |  |  |  |  |  |  |  |  |  |  |  |  |  |  |  |  |  | ________/µl |
|  |  |  |  |  |  |  |  |  |  |  |  |  |  |  |  |  |  |  |  |  | ________/µl |
|  |  |  |  |  |  |  |  |  |  |  |  |  |  |  |  |  |  |  |  |  | ________/µl |
